# Supplementary material
Source: publisher figshare collection journal article supplement (https://acs.figshare.com/ndownloader/files/4863586)
Supplement: Supplementary file 1 [file 4863586]

HETATM    1  N   ORN A   1       3.130  90.653  84.684  1.00 65.29           N  
ANISOU    1  N   ORN A   1    12130   6982   5696   -452  -1139    518       N  
HETATM    2  CA  ORN A   1       3.857  91.680  85.416  1.00 52.62           C  
ANISOU    2  CA  ORN A   1     9879   5656   4460   -181   -712    531       C  
HETATM    3  C   ORN A   1       5.204  91.112  85.942  1.00 55.04           C  
ANISOU    3  C   ORN A   1    10464   5690   4758    152   -524    541       C  
HETATM    4  O   ORN A   1       5.426  89.922  86.018  1.00 57.74           O  
ANISOU    4  O   ORN A   1    11414   5699   4825     88   -706    526       O  
HETATM    5  CB  ORN A   1       3.051  92.200  86.704  1.00 54.57           C  
ANISOU    5  CB  ORN A   1     9446   6323   4965   -634   -707    572       C  
HETATM    6  CG  ORN A   1       1.932  93.162  86.406  1.00 74.29           C  
ANISOU    6  CG  ORN A   1    11426   9214   7586   -824   -726    616       C  
HETATM    7  CD  ORN A   1       2.456  94.516  86.053  1.00 54.14           C  
ANISOU    7  CD  ORN A   1     8439   6841   5290   -381   -395    576       C  
HETATM    8  NE  ORN A   1       3.122  95.166  87.192  1.00 56.60           N  
ANISOU    8  NE  ORN A   1     8342   7283   5880   -232   -157    562       N  
HETATM    9  HA  ORN A   1       4.080  92.474  84.697  1.00 63.15           H  
HETATM   10  HB2 ORN A   1       2.639  91.343  87.255  1.00 65.48           H  
HETATM   11  HB3 ORN A   1       3.767  92.743  87.336  1.00 65.48           H  
HETATM   12  HG2 ORN A   1       1.335  92.774  85.573  1.00 89.15           H  
HETATM   13  HG3 ORN A   1       1.294  93.251  87.293  1.00 89.15           H  
HETATM   14  HD2 ORN A   1       1.615  95.143  85.745  1.00 64.97           H  
HETATM   15  HD3 ORN A   1       3.177  94.411  85.236  1.00 64.97           H  
HETATM   16  HE1 ORN A   1       2.500  95.540  87.907  1.00 67.92           H  
HETATM   17  H1  ORN A   1       3.715  90.137  84.022  1.00 78.35           H  
HETATM   18  H2  ORN A   1       2.716  89.941  85.291  1.00 78.35           H  
HETATM   19  H3  ORN A   1       2.354  91.023  84.130  1.00 78.35           H  
ATOM     20  N   LEU A   2       6.107  92.030  86.358  1.00 52.08           N  
ANISOU   20  N   LEU A   2     9604   5464   4719    495   -179    593       N  
ATOM     21  CA  LEU A   2       7.366  91.636  86.957  1.00 51.54           C  
ANISOU   21  CA  LEU A   2     9660   5198   4726    776     -5    663       C  
ATOM     22  C   LEU A   2       7.148  91.623  88.446  1.00 53.19           C  
ANISOU   22  C   LEU A   2     9537   5564   5106    388    -64    623       C  
ATOM     23  O   LEU A   2       6.465  92.502  88.979  1.00 55.60           O  
ANISOU   23  O   LEU A   2     9307   6200   5619    166    -61    589       O  
ATOM     24  CB  LEU A   2       8.486  92.639  86.677  1.00 49.84           C  
ANISOU   24  CB  LEU A   2     9058   5040   4838   1312    332    818       C  
ATOM     25  CG  LEU A   2       8.877  92.794  85.224  1.00 59.10           C  
ANISOU   25  CG  LEU A   2    10480   6101   5875   1830    488    930       C  
ATOM     26  CD1 LEU A   2       9.848  93.890  85.126  1.00 57.85           C  
ANISOU   26  CD1 LEU A   2     9778   6067   6135   2252    791   1154       C  
ATOM     27  CD2 LEU A   2       9.477  91.496  84.719  1.00 61.26           C  
ANISOU   27  CD2 LEU A   2    11562   5985   5729   2139    477    979       C  
ATOM     28  H   LEU A   2       5.969  92.878  86.359  1.00 62.49           H  
ATOM     29  HA  LEU A   2       7.631  90.753  86.656  1.00 61.85           H  
ATOM     30  HB2 LEU A   2       8.204  93.510  86.997  1.00 59.80           H  
ATOM     31  HB3 LEU A   2       9.277  92.357  87.162  1.00 59.80           H  
ATOM     32  HG  LEU A   2       8.097  93.013  84.690  1.00 70.92           H  
ATOM     33 HD11 LEU A   2      10.108  93.999  84.198  1.00 69.42           H  
ATOM     34 HD12 LEU A   2       9.438  94.705  85.455  1.00 69.42           H  
ATOM     35 HD13 LEU A   2      10.626  93.670  85.663  1.00 69.42           H  
ATOM     36 HD21 LEU A   2       9.725  91.604  83.788  1.00 73.51           H  
ATOM     37 HD22 LEU A   2      10.262  91.285  85.248  1.00 73.51           H  
ATOM     38 HD23 LEU A   2       8.819  90.789  84.807  1.00 73.51           H  
ATOM     39  N   VAL A   3       7.790  90.688  89.122  1.00 51.01           N  
ANISOU   39  N   VAL A   3     7026   5680   6677  -1211   -184    918       N  
ATOM     40  CA  VAL A   3       7.703  90.630  90.592  1.00 49.06           C  
ANISOU   40  CA  VAL A   3     6983   5215   6442  -1201    -21    910       C  
ATOM     41  C   VAL A   3       9.160  90.658  91.076  1.00 47.37           C  
ANISOU   41  C   VAL A   3     6887   5109   6003   -901   -100    834       C  
ATOM     42  O   VAL A   3       9.965  89.796  90.697  1.00 47.26           O  
ANISOU   42  O   VAL A   3     7054   5131   5771   -680   -229    736       O  
ATOM     43  CB  VAL A   3       6.978  89.412  91.078  1.00 50.85           C  
ANISOU   43  CB  VAL A   3     7575   5129   6619  -1324     24    907       C  
ATOM     44  CG1 VAL A   3       7.027  89.374  92.635  1.00 57.38           C  
ANISOU   44  CG1 VAL A   3     8655   5795   7352  -1303    212    928       C  
ATOM     45  CG2 VAL A   3       5.551  89.410  90.586  1.00 59.01           C  
ANISOU   45  CG2 VAL A   3     8411   6071   7939  -1650     65   1028       C  
ATOM     46  H   VAL A   3       8.298  90.086  88.777  1.00 61.22           H  
ATOM     47  HA  VAL A   3       7.247  91.418  90.926  1.00 58.87           H  
ATOM     48  HB  VAL A   3       7.420  88.618  90.739  1.00 61.03           H  
ATOM     49 HG11 VAL A   3       6.558  88.584  92.946  1.00 68.86           H  
ATOM     50 HG12 VAL A   3       7.954  89.342  92.920  1.00 68.86           H  
ATOM     51 HG13 VAL A   3       6.601  90.172  92.983  1.00 68.86           H  
ATOM     52 HG21 VAL A   3       5.105  88.613  90.914  1.00 70.81           H  
ATOM     53 HG22 VAL A   3       5.101  90.202  90.919  1.00 70.81           H  
ATOM     54 HG23 VAL A   3       5.552  89.413  89.616  1.00 70.81           H  
ATOM     55  N   PHE A   4       9.528  91.703  91.815  1.00 45.66           N  
ANISOU   55  N   PHE A   4     6532   4947   5868   -874    -61    873       N  
ATOM     56  CA  PHE A   4      10.821  91.784  92.473  1.00 45.38           C  
ANISOU   56  CA  PHE A   4     6605   4962   5675   -644   -185    837       C  
ATOM     57  C   PHE A   4      10.662  91.306  93.922  1.00 48.97           C  
ANISOU   57  C   PHE A   4     7502   5127   5977   -634   -107    789       C  
ATOM     58  O   PHE A   4       9.561  91.282  94.461  1.00 55.53           O  
ANISOU   58  O   PHE A   4     8450   5794   6856   -818    107    806       O  
ATOM     59  CB  PHE A   4      11.368  93.198  92.465  1.00 44.57           C  
ANISOU   59  CB  PHE A   4     6151   5040   5745   -656   -283    924       C  
ATOM     60  CG  PHE A   4      11.583  93.748  91.063  1.00 44.46           C  
ANISOU   60  CG  PHE A   4     5697   5347   5847   -708   -366   1046       C  
ATOM     61  CD1 PHE A   4      10.535  94.250  90.346  1.00 65.55           C  
ANISOU   61  CD1 PHE A   4     8148   8033   8725   -928   -309   1121       C  
ATOM     62  CD2 PHE A   4      12.800  93.632  90.484  1.00 56.44           C  
ANISOU   62  CD2 PHE A   4     7041   7160   7244   -530   -488   1099       C  
ATOM     63  CE1 PHE A   4      10.740  94.691  89.057  1.00 59.29           C  
ANISOU   63  CE1 PHE A   4     7014   7542   7971   -997   -409   1265       C  
ATOM     64  CE2 PHE A   4      13.006  94.090  89.216  1.00 59.71           C  
ANISOU   64  CE2 PHE A   4     7079   7922   7687   -590   -521   1243       C  
ATOM     65  CZ  PHE A   4      11.965  94.617  88.534  1.00 47.27           C  
ANISOU   65  CZ  PHE A   4     5348   6340   6271   -837   -493   1327       C  
ATOM     66  H   PHE A   4       9.031  92.391  91.951  1.00 54.79           H  
ATOM     67  HA  PHE A   4      11.454  91.204  92.021  1.00 54.46           H  
ATOM     68  HB2 PHE A   4      10.740  93.781  92.921  1.00 53.49           H  
ATOM     69  HB3 PHE A   4      12.222  93.208  92.924  1.00 53.49           H  
ATOM     70  HD1 PHE A   4       9.690  94.307  90.730  1.00 78.66           H  
ATOM     71  HD2 PHE A   4      13.511  93.280  90.969  1.00 67.73           H  
ATOM     72  HE1 PHE A   4      10.041  95.063  88.570  1.00 71.15           H  
ATOM     73  HE2 PHE A   4      13.848  94.035  88.825  1.00 71.66           H  
ATOM     74  HZ  PHE A   4      12.102  94.918  87.664  1.00 56.72           H  
ATOM     75  N   PHE A   5      11.770  90.883  94.522  1.00 48.67           N  
ANISOU   75  N   PHE A   5     7694   5052   5748   -419   -280    755       N  
ATOM     76  CA  PHE A   5      11.757  90.329  95.881  1.00 48.75           C  
ANISOU   76  CA  PHE A   5     8192   4793   5537   -407   -269    741       C  
ATOM     77  C   PHE A   5      12.616  91.209  96.771  1.00 54.95           C  
ANISOU   77  C   PHE A   5     9010   5600   6270   -315   -433    736       C  
ATOM     78  O   PHE A   5      13.589  91.825  96.320  1.00 52.04           O  
ANISOU   78  O   PHE A   5     8321   5428   6024   -198   -646    764       O  
ATOM     79  CB  PHE A   5      12.211  88.928  95.916  1.00 54.16           C  
ANISOU   79  CB  PHE A   5     9218   5312   6046   -254   -420    721       C  
ATOM     80  CG  PHE A   5      11.299  88.043  95.159  1.00 70.07           C  
ANISOU   80  CG  PHE A   5    11295   7218   8111   -381   -327    715       C  
ATOM     81  CD1 PHE A   5      10.159  87.543  95.769  1.00 64.22           C  
ANISOU   81  CD1 PHE A   5    10827   6237   7336   -646   -148    805       C  
ATOM     82  CD2 PHE A   5      11.514  87.786  93.804  1.00 75.68           C  
ANISOU   82  CD2 PHE A   5    11768   8090   8898   -265   -413    636       C  
ATOM     83  CE1 PHE A   5       9.275  86.704  95.072  1.00 73.02           C  
ANISOU   83  CE1 PHE A   5    11992   7206   8547   -820   -134    837       C  
ATOM     84  CE2 PHE A   5      10.636  86.960  93.108  1.00 79.09           C  
ANISOU   84  CE2 PHE A   5    12318   8368   9364   -403   -403    612       C  
ATOM     85  CZ  PHE A   5       9.513  86.423  93.760  1.00 68.66           C  
ANISOU   85  CZ  PHE A   5    11270   6748   8069   -700   -294    724       C  
ATOM     86  H   PHE A   5      12.551  90.905  94.163  1.00 58.41           H  
ATOM     87  HA  PHE A   5      10.849  90.356  96.222  1.00 58.50           H  
ATOM     88  HB2 PHE A   5      13.094  88.867  95.518  1.00 64.99           H  
ATOM     89  HB3 PHE A   5      12.236  88.622  96.837  1.00 64.99           H  
ATOM     90  HD1 PHE A   5      10.009  87.719  96.669  1.00 77.06           H  
ATOM     91  HD2 PHE A   5      12.268  88.126  93.379  1.00 90.82           H  
ATOM     92  HE1 PHE A   5       8.525  86.355  95.498  1.00 87.63           H  
ATOM     93  HE2 PHE A   5      10.790  86.767  92.211  1.00 94.91           H  
ATOM     94  HZ  PHE A   5       8.920  85.883  93.289  1.00 82.39           H  
ATOM     95  N   ALA A   6      12.099  91.451  97.968  1.00 48.85           N  
ANISOU   95  N   ALA A   6     8572   4651   5338   -413   -304    711       N  
ATOM     96  CA  ALA A   6      12.773  92.266  98.959  1.00 48.09           C  
ANISOU   96  CA  ALA A   6     8637   4504   5130   -347   -492    668       C  
ATOM     97  C   ALA A   6      12.566  91.614 100.314  1.00 50.90           C  
ANISOU   97  C   ALA A   6     9611   4635   5094   -369   -430    662       C  
ATOM     98  O   ALA A   6      11.581  90.887 100.513  1.00 51.82           O  
ANISOU   98  O   ALA A   6     9933   4666   5091   -506   -127    710       O  
ATOM     99  CB  ALA A   6      12.233  93.667  98.990  1.00 47.57           C  
ANISOU   99  CB  ALA A   6     8337   4483   5256   -439   -383    596       C  
ATOM    100  H   ALA A   6      11.339  91.146  98.232  1.00 58.62           H  
ATOM    101  HA  ALA A   6      13.723  92.299  98.769  1.00 57.71           H  
ATOM    102  HB1 ALA A   6      12.711  94.174  99.665  1.00 57.09           H  
ATOM    103  HB2 ALA A   6      12.361  94.073  98.119  1.00 57.09           H  
ATOM    104  HB3 ALA A   6      11.288  93.636  99.207  1.00 57.09           H  
ATOM    105  N   GLU A   7      13.520  91.836 101.210  1.00 52.74           N  
ANISOU  105  N   GLU A   7    10133   4778   5129   -262   -751    645       N  
ATOM    106  CA  GLU A   7      13.325  91.525 102.634  1.00 56.12           C  
ANISOU  106  CA  GLU A   7    11202   5014   5107   -305   -712    636       C  
ATOM    107  C   GLU A   7      12.817  92.809 103.246  1.00 59.72           C  
ANISOU  107  C   GLU A   7    11717   5480   5495   -348   -551    469       C  
ATOM    108  O   GLU A   7      13.416  93.862 103.007  1.00 56.37           O  
ANISOU  108  O   GLU A   7    11033   5088   5297   -285   -824    390       O  
ATOM    109  CB  GLU A   7      14.608  91.119 103.329  1.00 58.32           C  
ANISOU  109  CB  GLU A   7    11816   5157   5186   -165  -1212    698       C  
ATOM    110  CG  GLU A   7      15.042  89.745 103.032  1.00 71.27           C  
ANISOU  110  CG  GLU A   7    13552   6704   6824    -73  -1374    833       C  
ATOM    111  CD  GLU A   7      16.284  89.361 103.812  1.00 77.56           C  
ANISOU  111  CD  GLU A   7    14675   7338   7455     82  -1905    912       C  
ATOM    112  OE1 GLU A   7      16.738  90.173 104.652  1.00 89.02           O  
ANISOU  112  OE1 GLU A   7    16332   8749   8744     70  -2148    868       O  
ATOM    113  OE2 GLU A   7      16.799  88.253 103.568  1.00 83.62           O1-
ANISOU  113  OE2 GLU A   7    15501   7994   8276    228  -2118   1007       O1-
ATOM    114  H   GLU A   7      14.293  92.165 101.025  1.00 63.29           H  
ATOM    115  HA  GLU A   7      12.660  90.827 102.743  1.00 67.34           H  
ATOM    116  HB2 GLU A   7      15.317  91.720 103.050  1.00 69.98           H  
ATOM    117  HB3 GLU A   7      14.478  91.187 104.288  1.00 69.98           H  
ATOM    118  HG2 GLU A   7      14.332  89.128 103.270  1.00 85.53           H  
ATOM    119  HG3 GLU A   7      15.244  89.672 102.086  1.00 85.53           H  
ATOM    120  N   ASP A   8      11.649  92.759 103.860  1.00 59.10           N  
ANISOU  120  N   ASP A   8    11885   5390   5181   -453    -87    423       N  
ATOM    121  CA  ASP A   8      11.051  93.915 104.513  1.00 61.14           C  
ANISOU  121  CA  ASP A   8    12244   5651   5333   -425    140    207       C  
ATOM    122  C   ASP A   8      11.399  93.756 105.972  1.00 65.61           C  
ANISOU  122  C   ASP A   8    13545   6092   5293   -387     37    153       C  
ATOM    123  O   ASP A   8      10.891  92.838 106.626  1.00 68.22           O  
ANISOU  123  O   ASP A   8    14266   6424   5230   -489    318    283       O  
ATOM    124  CB  ASP A   8       9.549  93.918 104.275  1.00 61.43           C  
ANISOU  124  CB  ASP A   8    12045   5808   5488   -528    758    202       C  
ATOM    125  CG  ASP A   8       8.852  95.171 104.748  1.00 70.54           C  
ANISOU  125  CG  ASP A   8    13177   6978   6647   -423   1032    -61       C  
ATOM    126  OD1 ASP A   8       9.451  95.988 105.478  1.00 65.84           O  
ANISOU  126  OD1 ASP A   8    12913   6262   5842   -280    766   -273       O  
ATOM    127  OD2 ASP A   8       7.664  95.347 104.371  1.00 85.70           O1-
ANISOU  127  OD2 ASP A   8    14737   9011   8814   -470   1497    -67       O1-
ATOM    128  H   ASP A   8      11.168  92.049 103.915  1.00 70.92           H  
ATOM    129  HA  ASP A   8      11.437  94.737 104.173  1.00 73.36           H  
ATOM    130  HB2 ASP A   8       9.384  93.829 103.324  1.00 73.72           H  
ATOM    131  HB3 ASP A   8       9.158  93.166 104.747  1.00 73.72           H  
ATOM    132  N   CYS A   9      12.285  94.610 106.469  1.00 66.97           N  
ANISOU  132  N   CYS A   9    13920   6144   5380   -273   -411     -3       N  
ATOM    133  CA  CYS A   9      12.840  94.464 107.813  1.00 71.51           C  
ANISOU  133  CA  CYS A   9    15240   6572   5360   -239   -673    -47       C  
ATOM    134  C   CYS A   9      12.299  95.521 108.764  1.00 81.71           C  
ANISOU  134  C   CYS A   9    16935   7818   6294   -145   -474   -373       C  
ATOM    135  O   CYS A   9      12.339  96.717 108.464  1.00 75.12           O  
ANISOU  135  O   CYS A   9    15851   6918   5775    -49   -614   -599       O  
ATOM    136  CB  CYS A   9      14.359  94.527 107.727  1.00 70.96           C  
ANISOU  136  CB  CYS A   9    15150   6367   5445   -182  -1437     37       C  
ATOM    137  SG  CYS A   9      15.034  93.189 106.685  1.00 75.29           S  
ANISOU  137  SG  CYS A   9    15273   6982   6352   -187  -1628    364       S  
ATOM    138  H   CYS A   9      12.587  95.293 106.042  1.00 80.36           H  
ATOM    139  HA  CYS A   9      12.595  93.593 108.163  1.00 85.82           H  
ATOM    140  HB2 CYS A   9      14.622  95.376 107.338  1.00 85.15           H  
ATOM    141  HB3 CYS A   9      14.734  94.436 108.617  1.00 85.15           H  
ATOM    142  N   GLY A  10      11.755  95.066 109.898  1.00 80.47           N  
ANISOU  142  N   GLY A  10    17414   7695   5465   -168   -130   -394       N  
ATOM    143  CA  GLY A  10      11.476  95.915 111.032  1.00 86.02           C  
ANISOU  143  CA  GLY A  10    18702   8348   5631    -30    -14   -730       C  
ATOM    144  C   GLY A  10      12.602  95.864 112.053  1.00 89.84           C  
ANISOU  144  C   GLY A  10    19921   8619   5595    -17   -669   -750       C  
ATOM    145  O   GLY A  10      13.703  95.398 111.776  1.00 97.19           O  
ANISOU  145  O   GLY A  10    20773   9421   6735    -85  -1288   -524       O  
ATOM    146  H   GLY A  10      11.537  94.244 110.026  1.00 96.56           H  
ATOM    147  HA2 GLY A  10      11.367  96.832 110.735  1.00103.22           H  
ATOM    148  HA3 GLY A  10      10.655  95.627 111.461  1.00103.22           H  
ATOM    149  N   SER A  11      12.303  96.365 113.261  1.00 96.17           N  
ANISOU  149  N   SER A  11    21450   9393   5698     92   -528  -1036       N  
ATOM    150  CA  SER A  11      13.334  96.455 114.282  1.00107.08           C  
ANISOU  150  CA  SER A  11    23326  10558   6801    102  -1178  -1031       C  
ATOM    151  C   SER A  11      13.986  95.103 114.498  1.00120.84           C  
ANISOU  151  C   SER A  11    25175  12271   8469    -82  -1455   -594       C  
ATOM    152  O   SER A  11      15.211  94.966 114.406  1.00127.80           O  
ANISOU  152  O   SER A  11    26016  12937   9605   -111  -2200   -451       O  
ATOM    153  CB  SER A  11      12.721  96.968 115.575  1.00108.35           C  
ANISOU  153  CB  SER A  11    23989  10784   6395    238   -818  -1303       C  
ATOM    154  OG  SER A  11      11.513  96.264 115.809  1.00124.97           O  
ANISOU  154  OG  SER A  11    26074  13223   8187    182     44  -1185       O  
ATOM    155  H   SER A  11      11.528  96.650 113.501  1.00115.40           H  
ATOM    156  HA  SER A  11      14.016  97.083 113.997  1.00128.49           H  
ATOM    157  HB2 SER A  11      13.335  96.810 116.308  1.00130.02           H  
ATOM    158  HB3 SER A  11      12.532  97.915 115.489  1.00130.02           H  
ATOM    159  HG  SER A  11      11.158  96.533 116.521  1.00149.97           H  
ATOM    160  N   ASN A  12      13.172  94.079 114.735  1.00101.79           N  
ANISOU  160  N   ASN A  12    22822  10060   5794   -210   -872   -363       N  
ATOM    161  CA  ASN A  12      13.678  92.774 115.124  1.00103.20           C  
ANISOU  161  CA  ASN A  12    23167  10161   5885   -379  -1122     15       C  
ATOM    162  C   ASN A  12      13.570  91.697 114.044  1.00119.91           C  
ANISOU  162  C   ASN A  12    24831  12317   8413   -505  -1034    339       C  
ATOM    163  O   ASN A  12      14.285  90.696 114.127  1.00106.44           O  
ANISOU  163  O   ASN A  12    23165  10455   6821   -582  -1445    602       O  
ATOM    164  CB  ASN A  12      12.936  92.308 116.376  1.00110.34           C  
ANISOU  164  CB  ASN A  12    24535  11222   6168   -474   -652     82       C  
ATOM    165  CG  ASN A  12      13.246  93.191 117.587  1.00138.74           C  
ANISOU  165  CG  ASN A  12    28679  14742   9293   -341   -863   -206       C  
ATOM    166  ND2 ASN A  12      12.289  93.316 118.499  1.00138.80           N  
ANISOU  166  ND2 ASN A  12    28987  15008   8741   -321   -250   -312       N  
ATOM    167  OD1 ASN A  12      14.338  93.758 117.693  1.00144.73           O  
ANISOU  167  OD1 ASN A  12    29562  15223  10208   -257  -1578   -321       O  
ATOM    168  H   ASN A  12      12.315  94.117 114.676  1.00122.15           H  
ATOM    169  HA  ASN A  12      14.616  92.863 115.354  1.00123.84           H  
ATOM    170  HB2 ASN A  12      11.981  92.345 116.212  1.00132.41           H  
ATOM    171  HB3 ASN A  12      13.205  91.401 116.586  1.00132.41           H  
ATOM    172 HD21 ASN A  12      12.420  93.802 119.197  1.00166.56           H  
ATOM    173 HD22 ASN A  12      11.538  92.910 118.393  1.00166.56           H  
ATOM    174  N   LYS A  13      12.709  91.850 113.046  1.00 93.54           N  
ANISOU  174  N   LYS A  13    21068   9155   5319   -515   -533    317       N  
ATOM    175  CA  LYS A  13      12.430  90.722 112.172  1.00 89.97           C  
ANISOU  175  CA  LYS A  13    20260   8730   5195   -659   -385    643       C  
ATOM    176  C   LYS A  13      12.289  91.188 110.734  1.00 83.59           C  
ANISOU  176  C   LYS A  13    18687   7992   5080   -584   -306    552       C  
ATOM    177  O   LYS A  13      12.014  92.351 110.478  1.00 82.41           O  
ANISOU  177  O   LYS A  13    18247   7925   5139   -465   -154    259       O  
ATOM    178  CB  LYS A  13      11.158  89.985 112.610  1.00 93.37           C  
ANISOU  178  CB  LYS A  13    20739   9352   5385   -866    319    831       C  
ATOM    179  CG  LYS A  13       9.921  90.865 112.760  1.00112.46           C  
ANISOU  179  CG  LYS A  13    23058  12052   7620   -828   1080    610       C  
ATOM    180  CD  LYS A  13       8.682  90.324 111.983  1.00101.11           C  
ANISOU  180  CD  LYS A  13    21122  10807   6487  -1020   1728    834       C  
ATOM    181  CE  LYS A  13       8.775  90.589 110.511  1.00105.89           C  
ANISOU  181  CE  LYS A  13    21018  11358   7857   -960   1588    771       C  
ATOM    182  NZ  LYS A  13       7.499  90.291 109.758  1.00111.85           N1+
ANISOU  182  NZ  LYS A  13    21183  12293   9023  -1130   2176    921       N1+
ATOM    183  H   LYS A  13      12.286  92.575 112.858  1.00112.25           H  
ATOM    184  HA  LYS A  13      13.170  90.096 112.215  1.00107.97           H  
ATOM    185  HB2 LYS A  13      10.953  89.303 111.951  1.00112.04           H  
ATOM    186  HB3 LYS A  13      11.325  89.566 113.469  1.00112.04           H  
ATOM    187  HG2 LYS A  13       9.684  90.918 113.699  1.00134.95           H  
ATOM    188  HG3 LYS A  13      10.122  91.751 112.420  1.00134.95           H  
ATOM    189  HD2 LYS A  13       8.620  89.365 112.113  1.00121.33           H  
ATOM    190  HD3 LYS A  13       7.882  90.758 112.318  1.00121.33           H  
ATOM    191  HE2 LYS A  13       8.988  91.526 110.375  1.00127.07           H  
ATOM    192  HE3 LYS A  13       9.477  90.034 110.137  1.00127.07           H  
ATOM    193  HZ1 LYS A  13       7.610  90.466 108.892  1.00134.22           H  
ATOM    194  HZ2 LYS A  13       7.282  89.434 109.855  1.00134.22           H  
ATOM    195  HZ3 LYS A  13       6.836  90.795 110.072  1.00134.22           H  
ATOM    196  N   CYS A  14      12.479  90.242 109.804  1.00 52.77           N  
ANISOU  196  N   CYS A  14     9705   5061   5282    178  -1067    148       N  
ATOM    197  CA  CYS A  14      12.447  90.466 108.359  1.00 52.37           C  
ANISOU  197  CA  CYS A  14     9411   5032   5454     87   -966    212       C  
ATOM    198  C   CYS A  14      11.515  89.450 107.733  1.00 51.10           C  
ANISOU  198  C   CYS A  14     9241   5107   5067   -189   -709    288       C  
ATOM    199  O   CYS A  14      11.430  88.309 108.201  1.00 53.54           O  
ANISOU  199  O   CYS A  14     9748   5410   5183   -359   -645    347       O  
ATOM    200  CB  CYS A  14      13.834  90.310 107.737  1.00 71.65           C  
ANISOU  200  CB  CYS A  14    11834   7122   8267    113  -1071    339       C  
ATOM    201  SG  CYS A  14      15.106  91.554 108.185  1.00 76.98           S  
ANISOU  201  SG  CYS A  14    12429   7449   9373    358  -1479    377       S  
ATOM    202  H   CYS A  14      12.635  89.420 110.004  1.00 63.32           H  
ATOM    203  HA  CYS A  14      12.115  91.357 108.169  1.00 62.84           H  
ATOM    204  HB2 CYS A  14      14.183  89.442 107.995  1.00 85.98           H  
ATOM    205  HB3 CYS A  14      13.735  90.340 106.772  1.00 85.98           H  
ATOM    206  N   ALA A  15      10.746  89.901 106.747  1.00 46.94           N  
ANISOU  206  N   ALA A  15     8494   4785   4557   -245   -601    297       N  
ATOM    207  CA  ALA A  15       9.851  89.067 105.981  1.00 49.47           C  
ANISOU  207  CA  ALA A  15     8801   5283   4710   -533   -448    391       C  
ATOM    208  C   ALA A  15      10.191  89.236 104.513  1.00 54.74           C  
ANISOU  208  C   ALA A  15     9397   5822   5580   -530   -425    413       C  
ATOM    209  O   ALA A  15      10.530  90.342 104.082  1.00 50.69           O  
ANISOU  209  O   ALA A  15     8679   5282   5300   -320   -464    370       O  
ATOM    210  CB  ALA A  15       8.408  89.480 106.201  1.00 62.81           C  
ANISOU  210  CB  ALA A  15    10275   7400   6189   -591   -342    432       C  
ATOM    211  H   ALA A  15      10.730  90.725 106.499  1.00 56.33           H  
ATOM    212  HA  ALA A  15       9.961  88.136 106.231  1.00 59.36           H  
ATOM    213  HB1 ALA A  15       7.831  88.903 105.676  1.00 75.37           H  
ATOM    214  HB2 ALA A  15       8.195  89.391 107.143  1.00 75.37           H  
ATOM    215  HB3 ALA A  15       8.298  90.402 105.921  1.00 75.37           H  
ATOM    216  N   ILE A  16      10.012  88.174 103.724  1.00 48.52           N  
ANISOU  216  N   ILE A  16     8798   4958   4679   -750   -378    492       N  
ATOM    217  CA  ILE A  16      10.197  88.295 102.271  1.00 52.67           C  
ANISOU  217  CA  ILE A  16     9320   5379   5313   -697   -341    517       C  
ATOM    218  C   ILE A  16       8.926  88.843 101.658  1.00 50.06           C  
ANISOU  218  C   ILE A  16     8749   5362   4911   -833   -309    512       C  
ATOM    219  O   ILE A  16       7.837  88.321 101.906  1.00 56.06           O  
ANISOU  219  O   ILE A  16     9506   6334   5460  -1121   -323    581       O  
ATOM    220  CB  ILE A  16      10.546  86.931 101.647  1.00 61.75           C  
ANISOU  220  CB  ILE A  16    10892   6262   6310   -812   -346    588       C  
ATOM    221  CG1 ILE A  16      11.950  86.491 102.081  1.00 71.39           C  
ANISOU  221  CG1 ILE A  16    12313   7175   7636   -599   -337    636       C  
ATOM    222  CG2 ILE A  16      10.431  86.996 100.135  1.00 58.87           C  
ANISOU  222  CG2 ILE A  16    10599   5828   5941   -747   -314    611       C  
ATOM    223  CD1 ILE A  16      13.055  87.382 101.554  1.00 77.73           C  
ANISOU  223  CD1 ILE A  16    12916   7849   8770   -235   -291    712       C  
ATOM    224  H   ILE A  16       9.788  87.389 103.995  1.00 58.22           H  
ATOM    225  HA  ILE A  16      10.921  88.914 102.086  1.00 63.20           H  
ATOM    226  HB  ILE A  16       9.908  86.277 101.973  1.00 74.11           H  
ATOM    227 HG12 ILE A  16      11.996  86.501 103.050  1.00 85.67           H  
ATOM    228 HG13 ILE A  16      12.112  85.592 101.753  1.00 85.67           H  
ATOM    229 HG21 ILE A  16      10.655  86.128  99.764  1.00 70.65           H  
ATOM    230 HG22 ILE A  16       9.521  87.233  99.897  1.00 70.65           H  
ATOM    231 HG23 ILE A  16      11.046  87.667  99.800  1.00 70.65           H  
ATOM    232 HD11 ILE A  16      13.909  87.044 101.867  1.00 93.28           H  
ATOM    233 HD12 ILE A  16      13.030  87.375 100.584  1.00 93.28           H  
ATOM    234 HD13 ILE A  16      12.915  88.284 101.882  1.00 93.28           H  
ATOM    235  N   ILE A  17       9.050  89.846 100.813  1.00 48.12           N  
ANISOU  235  N   ILE A  17     8281   5147   4855   -641   -273    481       N  
ATOM    236  CA  ILE A  17       7.892  90.301 100.080  1.00 50.77           C  
ANISOU  236  CA  ILE A  17     8406   5759   5125   -766   -242    491       C  
ATOM    237  C   ILE A  17       8.132  90.401  98.527  1.00 49.66           C  
ANISOU  237  C   ILE A  17     8322   5482   5063   -670   -215    506       C  
ATOM    238  O   ILE A  17       9.279  90.549  98.112  1.00 52.49           O  
ANISOU  238  O   ILE A  17     8751   5592   5599   -393   -174    527       O  
ATOM    239  CB  ILE A  17       7.457  91.667 100.576  1.00 56.01           C  
ANISOU  239  CB  ILE A  17     8699   6693   5888   -596   -207    430       C  
ATOM    240  CG1 ILE A  17       8.528  92.704 100.245  1.00 52.91           C  
ANISOU  240  CG1 ILE A  17     8180   6107   5817   -263   -233    373       C  
ATOM    241  CG2 ILE A  17       7.185  91.687 102.099  1.00 64.36           C  
ANISOU  241  CG2 ILE A  17     9751   7896   6807   -578   -216    416       C  
ATOM    242  CD1 ILE A  17       8.102  94.101 100.598  1.00 57.52           C  
ANISOU  242  CD1 ILE A  17     8470   6894   6491    -80   -252    296       C  
ATOM    243  H   ILE A  17       9.779  90.273 100.648  1.00 57.74           H  
ATOM    244  HA  ILE A  17       7.162  89.681 100.230  1.00 60.92           H  
ATOM    245  HB  ILE A  17       6.640  91.913 100.116  1.00 67.21           H  
ATOM    246 HG12 ILE A  17       9.333  92.499 100.745  1.00 63.49           H  
ATOM    247 HG13 ILE A  17       8.711  92.677  99.293  1.00 63.49           H  
ATOM    248 HG21 ILE A  17       6.912  92.580 102.359  1.00 77.23           H  
ATOM    249 HG22 ILE A  17       6.479  91.052 102.301  1.00 77.23           H  
ATOM    250 HG23 ILE A  17       7.997  91.439 102.568  1.00 77.23           H  
ATOM    251 HD11 ILE A  17       8.816  94.716 100.368  1.00 69.02           H  
ATOM    252 HD12 ILE A  17       7.300  94.323 100.099  1.00 69.02           H  
ATOM    253 HD13 ILE A  17       7.922  94.145 101.550  1.00 69.02           H  
HETATM  254  N   SAR A  18       7.037  90.367  97.735  1.00 57.11           N  
ANISOU  254  N   SAR A  18     9210   6609   5878   -876   -241    537       N  
HETATM  255  CA  SAR A  18       7.042  90.635  96.267  1.00 53.26           C  
ANISOU  255  CA  SAR A  18     8760   6050   5426   -762   -222    539       C  
HETATM  256  C   SAR A  18       6.663  91.965  96.064  1.00 56.04           C  
ANISOU  256  C   SAR A  18     8682   6659   5951   -624   -145    506       C  
HETATM  257  O   SAR A  18       5.795  92.542  96.672  1.00 58.06           O  
ANISOU  257  O   SAR A  18     8641   7229   6191   -726   -132    505       O  
HETATM  258  CN  SAR A  18       5.680  90.074  98.223  1.00 54.96           C  
ANISOU  258  CN  SAR A  18     8812   6647   5424  -1229   -299    625       C  
HETATM  259  HN1 SAR A  18       5.364  89.230  97.827  1.00 65.95           H  
HETATM  260  HN2 SAR A  18       5.074  90.805  97.965  1.00 65.95           H  
HETATM  261  HN3 SAR A  18       5.695  89.991  99.197  1.00 65.95           H  
HETATM  262  HA2 SAR A  18       7.765  90.324  95.705  1.00 63.91           H  
HETATM  263  HA3 SAR A  18       6.231  90.112  96.055  1.00 63.91           H  
ATOM    264  N   LEU A  19       7.380  92.639  95.199  1.00 48.33           N  
ANISOU  264  N   LEU A  19     7627   5566   5170   -314    -65    503       N  
ATOM    265  CA  LEU A  19       6.931  93.934  94.757  1.00 44.22           C  
ANISOU  265  CA  LEU A  19     6710   5280   4811   -191     -6    478       C  
ATOM    266  C   LEU A  19       6.571  93.797  93.280  1.00 59.49           C  
ANISOU  266  C   LEU A  19     8756   7195   6654   -181      9    510       C  
ATOM    267  O   LEU A  19       7.429  93.472  92.439  1.00 49.82           O  
ANISOU  267  O   LEU A  19     7777   5708   5445     63     64    563       O  
ATOM    268  CB  LEU A  19       7.997  94.944  94.923  1.00 46.82           C  
ANISOU  268  CB  LEU A  19     6816   5495   5477    150     37    491       C  
ATOM    269  CG  LEU A  19       8.382  95.198  96.399  1.00 55.92           C  
ANISOU  269  CG  LEU A  19     7911   6620   6717    169    -50    442       C  
ATOM    270  CD1 LEU A  19       9.670  95.968  96.423  1.00 70.78           C  
ANISOU  270  CD1 LEU A  19     9649   8267   8975    467   -100    525       C  
ATOM    271  CD2 LEU A  19       7.245  95.997  97.073  1.00 65.43           C  
ANISOU  271  CD2 LEU A  19     8875   8161   7823     97    -63    349       C  
ATOM    272  H   LEU A  19       8.123  92.375  94.856  1.00 58.00           H  
ATOM    273  HA  LEU A  19       6.146  94.209  95.256  1.00 53.06           H  
ATOM    274  HB2 LEU A  19       8.791  94.640  94.457  1.00 56.18           H  
ATOM    275  HB3 LEU A  19       7.694  95.784  94.546  1.00 56.18           H  
ATOM    276  HG  LEU A  19       8.502  94.356  96.865  1.00 67.11           H  
ATOM    277 HD11 LEU A  19       9.922  96.134  97.345  1.00 84.93           H  
ATOM    278 HD12 LEU A  19      10.358  95.446  95.980  1.00 84.93           H  
ATOM    279 HD13 LEU A  19       9.543  96.810  95.958  1.00 84.93           H  
ATOM    280 HD21 LEU A  19       7.481  96.159  98.000  1.00 78.51           H  
ATOM    281 HD22 LEU A  19       7.133  96.840  96.607  1.00 78.51           H  
ATOM    282 HD23 LEU A  19       6.426  95.480  97.025  1.00 78.51           H  
ATOM    283  N   MET A  20       5.316  94.042  92.964  1.00 48.04           N  
ANISOU  283  N   MET A  20     7137   6024   5091   -409    -36    508       N  
ATOM    284  CA  MET A  20       4.786  93.676  91.655  1.00 58.06           C  
ANISOU  284  CA  MET A  20     8607   7252   6202   -493   -111    536       C  
ATOM    285  C   MET A  20       4.703  94.917  90.799  1.00 53.81           C  
ANISOU  285  C   MET A  20     7734   6868   5843   -242      9    524       C  
ATOM    286  O   MET A  20       4.199  95.943  91.265  1.00 58.89           O  
ANISOU  286  O   MET A  20     7945   7805   6627   -237     73    506       O  
ATOM    287  CB  MET A  20       3.415  93.036  91.790  1.00 58.56           C  
ANISOU  287  CB  MET A  20     8698   7506   6047   -968   -302    613       C  
ATOM    288  CG  MET A  20       2.704  92.931  90.445  1.00 81.62           C  
ANISOU  288  CG  MET A  20    11753  10417   8840  -1079   -444    648       C  
ATOM    289  SD  MET A  20       1.503  91.582  90.527  1.00 86.88           S  
ANISOU  289  SD  MET A  20    12707  11061   9244  -1697   -825    813       S  
ATOM    290  CE  MET A  20       0.927  91.731  92.236  1.00 91.33           C  
ANISOU  290  CE  MET A  20    12792  12015   9893  -1923   -720    951       C  
ATOM    291  H   MET A  20       4.744  94.418  93.485  1.00 57.65           H  
ATOM    292  HA  MET A  20       5.381  93.035  91.235  1.00 69.67           H  
ATOM    293  HB2 MET A  20       3.514  92.141  92.150  1.00 70.28           H  
ATOM    294  HB3 MET A  20       2.867  93.576  92.380  1.00 70.28           H  
ATOM    295  HG2 MET A  20       2.233  93.758  90.257  1.00 97.94           H  
ATOM    296  HG3 MET A  20       3.349  92.735  89.747  1.00 97.94           H  
ATOM    297  HE1 MET A  20       0.264  91.045  92.406  1.00109.59           H  
ATOM    298  HE2 MET A  20       1.683  91.617  92.834  1.00109.59           H  
ATOM    299  HE3 MET A  20       0.535  92.609  92.361  1.00109.59           H  
ATOM    300  N   VAL A  21       5.223  94.833  89.570  1.00 49.95           N  
ANISOU  300  N   VAL A  21     7474   6175   5330     13     52    545       N  
ATOM    301  CA  VAL A  21       5.046  95.918  88.563  1.00 44.67           C  
ANISOU  301  CA  VAL A  21     6521   5654   4800    241    159    557       C  
ATOM    302  C   VAL A  21       4.488  95.276  87.277  1.00 45.49           C  
ANISOU  302  C   VAL A  21     7016   5654   4616    179     34    562       C  
ATOM    303  O   VAL A  21       5.239  94.781  86.452  1.00 50.64           O  
ANISOU  303  O   VAL A  21     8081   6017   5145    484     76    595       O  
ATOM    304  CB  VAL A  21       6.372  96.630  88.250  1.00 53.58           C  
ANISOU  304  CB  VAL A  21     7503   6633   6221    723    356    641       C  
ATOM    305  CG1 VAL A  21       6.130  97.786  87.219  1.00 67.82           C  
ANISOU  305  CG1 VAL A  21     8981   8606   8180    947    466    676       C  
ATOM    306  CG2 VAL A  21       7.050  97.141  89.523  1.00 71.67           C  
ANISOU  306  CG2 VAL A  21     9516   8921   8795    766    373    650       C  
ATOM    307  H   VAL A  21       5.683  94.164  89.285  1.00 59.94           H  
ATOM    308  HA  VAL A  21       4.408  96.571  88.890  1.00 53.61           H  
ATOM    309  HB  VAL A  21       6.974  95.992  87.836  1.00 64.29           H  
ATOM    310 HG11 VAL A  21       6.975  98.225  87.033  1.00 81.38           H  
ATOM    311 HG12 VAL A  21       5.765  97.410  86.403  1.00 81.38           H  
ATOM    312 HG13 VAL A  21       5.504  98.422  87.600  1.00 81.38           H  
ATOM    313 HG21 VAL A  21       7.880  97.582  89.283  1.00 86.00           H  
ATOM    314 HG22 VAL A  21       6.457  97.768  89.966  1.00 86.00           H  
ATOM    315 HG23 VAL A  21       7.231  96.388  90.107  1.00 86.00           H  
TER     316      VAL A  21 
HETATM  317  N   ORN B   1      13.316  98.944 106.825  1.00 55.41           N  
ANISOU  317  N   ORN B   1     9961   4837   6256    863   -730   -654       N  
HETATM  318  CA  ORN B   1      13.851  99.193 105.468  1.00 55.78           C  
ANISOU  318  CA  ORN B   1     9589   4958   6648    563   -743   -532       C  
HETATM  319  C   ORN B   1      13.678  97.941 104.635  1.00 58.55           C  
ANISOU  319  C   ORN B   1    10068   5319   6858    778   -649   -170       C  
HETATM  320  O   ORN B   1      13.508  96.804 105.117  1.00 60.99           O  
ANISOU  320  O   ORN B   1    10718   5668   6788   1193   -595    -68       O  
HETATM  321  CB  ORN B   1      15.386  99.508 105.492  1.00 53.76           C  
ANISOU  321  CB  ORN B   1     8860   5227   6340    515  -1037   -907       C  
HETATM  322  CG  ORN B   1      15.768 100.913 105.917  1.00 59.24           C  
ANISOU  322  CG  ORN B   1     9249   5921   7340    117  -1064  -1357       C  
HETATM  323  CD  ORN B   1      15.350 102.011 104.882  1.00 66.32           C  
ANISOU  323  CD  ORN B   1     9970   6352   8875   -395   -739  -1187       C  
HETATM  324  NE  ORN B   1      16.112 101.886 103.620  1.00 58.02           N  
ANISOU  324  NE  ORN B   1     8585   5442   8017   -528   -718  -1037       N  
HETATM  325  HA  ORN B   1      13.244  99.990 105.028  1.00 66.94           H  
HETATM  326  HB2 ORN B   1      15.787  99.358 104.480  1.00 64.51           H  
HETATM  327  HB3 ORN B   1      15.864  98.810 106.193  1.00 64.51           H  
HETATM  328  HG2 ORN B   1      15.293 101.132 106.880  1.00 71.09           H  
HETATM  329  HG3 ORN B   1      16.855 100.955 106.046  1.00 71.09           H  
HETATM  330  HD2 ORN B   1      14.283 101.904 104.666  1.00 79.58           H  
HETATM  331  HD3 ORN B   1      15.559 102.994 105.315  1.00 79.58           H  
HETATM  332  HE1 ORN B   1      17.033 102.320 103.625  1.00 69.62           H  
HETATM  333  H1  ORN B   1      12.398  98.491 106.822  1.00 66.49           H  
HETATM  334  H2  ORN B   1      13.915  98.338 107.391  1.00 66.49           H  
HETATM  335  H3  ORN B   1      13.197  99.798 107.376  1.00 66.49           H  
ATOM    336  N   LEU B   2      13.781  98.172 103.312  1.00 54.07           N  
ANISOU  336  N   LEU B   2     9226   4712   6607    486   -579     17       N  
ATOM    337  CA  LEU B   2      13.722  97.082 102.317  1.00 46.66           C  
ANISOU  337  CA  LEU B   2     8333   3824   5572    593   -479    299       C  
ATOM    338  C   LEU B   2      15.135  96.692 102.004  1.00 53.41           C  
ANISOU  338  C   LEU B   2     8898   5110   6286    707   -660    186       C  
ATOM    339  O   LEU B   2      15.999  97.582 101.939  1.00 52.68           O  
ANISOU  339  O   LEU B   2     8433   5201   6384    491   -804    -44       O  
ATOM    340  CB  LEU B   2      13.034  97.575 101.051  1.00 54.51           C  
ANISOU  340  CB  LEU B   2     9195   4601   6916    248   -319    557       C  
ATOM    341  CG  LEU B   2      11.626  98.118 101.265  1.00 57.45           C  
ANISOU  341  CG  LEU B   2     9614   4710   7506    125   -142    645       C  
ATOM    342  CD1 LEU B   2      11.052  98.631  99.987  1.00 56.01           C  
ANISOU  342  CD1 LEU B   2     9047   4618   7616    -99    -34    864       C  
ATOM    343  CD2 LEU B   2      10.707  97.015 101.872  1.00 54.77           C  
ANISOU  343  CD2 LEU B   2     9338   4514   6957    330      3    604       C  
ATOM    344  H   LEU B   2      13.934  98.946 102.969  1.00 64.89           H  
ATOM    345  HA  LEU B   2      13.243  96.317 102.674  1.00 55.99           H  
ATOM    346  HB2 LEU B   2      13.569  98.287 100.666  1.00 65.41           H  
ATOM    347  HB3 LEU B   2      12.973  96.837 100.424  1.00 65.41           H  
ATOM    348  HG  LEU B   2      11.664  98.855 101.894  1.00 68.94           H  
ATOM    349 HD11 LEU B   2      10.158  98.968 100.156  1.00 67.21           H  
ATOM    350 HD12 LEU B   2      11.617  99.344  99.651  1.00 67.21           H  
ATOM    351 HD13 LEU B   2      11.016  97.905  99.344  1.00 67.21           H  
ATOM    352 HD21 LEU B   2       9.818  97.381 102.000  1.00 65.72           H  
ATOM    353 HD22 LEU B   2      10.671  96.263 101.261  1.00 65.72           H  
ATOM    354 HD23 LEU B   2      11.075  96.732 102.724  1.00 65.72           H  
ATOM    355  N   VAL B   3      15.393  95.415 101.804  1.00 51.90           N  
ANISOU  355  N   VAL B   3     9688   5417   4614   1506   -273   1278       N  
ATOM    356  CA  VAL B   3      16.691  95.006 101.338  1.00 57.59           C  
ANISOU  356  CA  VAL B   3    10158   6434   5289   1572   -470   1356       C  
ATOM    357  C   VAL B   3      16.434  94.283 100.039  1.00 54.66           C  
ANISOU  357  C   VAL B   3     9882   6008   4878   1513   -259   1349       C  
ATOM    358  O   VAL B   3      15.777  93.248 100.061  1.00 54.80           O  
ANISOU  358  O   VAL B   3    10148   5633   5040   1545    355   1242       O  
ATOM    359  CB  VAL B   3      17.423  94.100 102.260  1.00 63.25           C  
ANISOU  359  CB  VAL B   3    11094   6994   5945   1905   -260   1466       C  
ATOM    360  CG1 VAL B   3      18.794  93.746 101.563  1.00 64.72           C  
ANISOU  360  CG1 VAL B   3    10960   7483   6147   1990   -469   1605       C  
ATOM    361  CG2 VAL B   3      17.639  94.744 103.646  1.00 69.35           C  
ANISOU  361  CG2 VAL B   3    11913   7794   6645   1878   -438   1506       C  
ATOM    362  H   VAL B   3      14.800  94.793 101.778  1.00 62.28           H  
ATOM    363  HA  VAL B   3      17.240  95.786 101.162  1.00 69.11           H  
ATOM    364  HB  VAL B   3      16.918  93.280 102.378  1.00 75.90           H  
ATOM    365 HG11 VAL B   3      19.298  93.153 102.142  1.00 77.67           H  
ATOM    366 HG12 VAL B   3      18.613  93.308 100.717  1.00 77.67           H  
ATOM    367 HG13 VAL B   3      19.292  94.564 101.413  1.00 77.67           H  
ATOM    368 HG21 VAL B   3      18.119  94.120 104.213  1.00 83.23           H  
ATOM    369 HG22 VAL B   3      18.156  95.558 103.538  1.00 83.23           H  
ATOM    370 HG23 VAL B   3      16.775  94.950 104.036  1.00 83.23           H  
ATOM    371  N   PHE B   4      17.020  94.755  98.949  1.00 51.04           N  
ANISOU  371  N   PHE B   4     9013   6006   4375   1246   -670   1311       N  
ATOM    372  CA  PHE B   4      17.005  94.100  97.645  1.00 54.65           C  
ANISOU  372  CA  PHE B   4     9153   6599   5011    868   -414   1048       C  
ATOM    373  C   PHE B   4      18.306  93.323  97.421  1.00 49.92           C  
ANISOU  373  C   PHE B   4     8517   6080   4369   1159   -269   1112       C  
ATOM    374  O   PHE B   4      19.301  93.502  98.141  1.00 59.99           O  
ANISOU  374  O   PHE B   4     9867   7443   5483   1602   -552   1417       O  
ATOM    375  CB  PHE B   4      16.830  95.101  96.525  1.00 58.08           C  
ANISOU  375  CB  PHE B   4     9109   7503   5454    294   -920    934       C  
ATOM    376  CG  PHE B   4      15.521  95.841  96.581  1.00 50.51           C  
ANISOU  376  CG  PHE B   4     8068   6460   4664     -1  -1044    910       C  
ATOM    377  CD1 PHE B   4      15.394  96.988  97.308  1.00 66.83           C  
ANISOU  377  CD1 PHE B   4    10191   8539   6664    157  -1462   1099       C  
ATOM    378  CD2 PHE B   4      14.428  95.354  95.876  1.00 55.43           C  
ANISOU  378  CD2 PHE B   4     8544   6979   5538   -463   -710    709       C  
ATOM    379  CE1 PHE B   4      14.218  97.637  97.358  1.00 50.00           C  
ANISOU  379  CE1 PHE B   4     7943   6275   4781    -54  -1497   1097       C  
ATOM    380  CE2 PHE B   4      13.227  96.009  95.904  1.00 59.23           C  
ANISOU  380  CE2 PHE B   4     8849   7391   6264   -713   -822    750       C  
ATOM    381  CZ  PHE B   4      13.126  97.150  96.660  1.00 53.48           C  
ANISOU  381  CZ  PHE B   4     8151   6632   5539   -464  -1188    948       C  
ATOM    382  H   PHE B   4      17.457  95.495  98.939  1.00 61.25           H  
ATOM    383  HA  PHE B   4      16.266  93.472  97.610  1.00 65.57           H  
ATOM    384  HB2 PHE B   4      17.544  95.755  96.575  1.00 69.69           H  
ATOM    385  HB3 PHE B   4      16.870  94.633  95.677  1.00 69.69           H  
ATOM    386  HD1 PHE B   4      16.122  97.315  97.786  1.00 80.20           H  
ATOM    387  HD2 PHE B   4      14.514  94.575  95.375  1.00 66.52           H  
ATOM    388  HE1 PHE B   4      14.139  98.416  97.859  1.00 60.00           H  
ATOM    389  HE2 PHE B   4      12.493  95.681  95.437  1.00 71.07           H  
ATOM    390  HZ  PHE B   4      12.319  97.610  96.692  1.00 64.18           H  
ATOM    391  N   PHE B   5      18.266  92.418  96.454  1.00 54.35           N  
ANISOU  391  N   PHE B   5     8976   6579   5096    895    216    837       N  
ATOM    392  CA  PHE B   5      19.408  91.553  96.240  1.00 54.78           C  
ANISOU  392  CA  PHE B   5     9004   6590   5220   1212    531    874       C  
ATOM    393  C   PHE B   5      19.842  91.542  94.794  1.00 57.93           C  
ANISOU  393  C   PHE B   5     9029   7340   5641    711    569    584       C  
ATOM    394  O   PHE B   5      19.041  91.645  93.848  1.00 52.85           O  
ANISOU  394  O   PHE B   5     8282   6807   4990     46    633    274       O  
ATOM    395  CB  PHE B   5      19.145  90.153  96.723  1.00 64.06           C  
ANISOU  395  CB  PHE B   5    10595   7152   6591   1544   1321    843       C  
ATOM    396  CG  PHE B   5      18.821  90.095  98.151  1.00 62.55           C  
ANISOU  396  CG  PHE B   5    10817   6616   6332   2017   1312   1144       C  
ATOM    397  CD1 PHE B   5      17.529  90.314  98.568  1.00 76.73           C  
ANISOU  397  CD1 PHE B   5    12843   8197   8112   1798   1404   1041       C  
ATOM    398  CD2 PHE B   5      19.818  89.851  99.113  1.00 76.11           C  
ANISOU  398  CD2 PHE B   5    12685   8238   7996   2660   1195   1569       C  
ATOM    399  CE1 PHE B   5      17.206  90.274  99.902  1.00 82.75           C  
ANISOU  399  CE1 PHE B   5    14044   8625   8773   2184   1457   1287       C  
ATOM    400  CE2 PHE B   5      19.495  89.814 100.459  1.00 75.53           C  
ANISOU  400  CE2 PHE B   5    13069   7853   7775   3011   1171   1856       C  
ATOM    401  CZ  PHE B   5      18.185  90.031 100.849  1.00 77.90           C  
ANISOU  401  CZ  PHE B   5    13630   7935   8033   2743   1327   1664       C  
ATOM    402  H   PHE B   5      17.605  92.288  95.920  1.00 65.22           H  
ATOM    403  HA  PHE B   5      20.151  91.899  96.759  1.00 65.73           H  
ATOM    404  HB2 PHE B   5      18.394  89.785  96.231  1.00 76.87           H  
ATOM    405  HB3 PHE B   5      19.936  89.613  96.573  1.00 76.87           H  
ATOM    406  HD1 PHE B   5      16.864  90.480  97.938  1.00 92.07           H  
ATOM    407  HD2 PHE B   5      20.697  89.708  98.844  1.00 91.34           H  
ATOM    408  HE1 PHE B   5      16.327  90.419 100.171  1.00 99.30           H  
ATOM    409  HE2 PHE B   5      20.152  89.648 101.095  1.00 90.63           H  
ATOM    410  HZ  PHE B   5      17.961  90.004 101.751  1.00 93.48           H  
ATOM    411  N   ALA B   6      21.144  91.450  94.635  1.00 52.10           N  
ANISOU  411  N   ALA B   6     8073   6803   4918   1004    504    719       N  
ATOM    412  CA  ALA B   6      21.753  91.424  93.326  1.00 53.13           C  
ANISOU  412  CA  ALA B   6     7869   7262   5055    577    601    454       C  
ATOM    413  C   ALA B   6      22.970  90.523  93.361  1.00 57.80           C  
ANISOU  413  C   ALA B   6     8390   7688   5885   1102   1078    558       C  
ATOM    414  O   ALA B   6      23.613  90.370  94.405  1.00 59.62           O  
ANISOU  414  O   ALA B   6     8660   7786   6207   1792    962    979       O  
ATOM    415  CB  ALA B   6      22.191  92.807  92.878  1.00 49.95           C  
ANISOU  415  CB  ALA B   6     7064   7506   4409    248   -225    541       C  
ATOM    416  H   ALA B   6      21.708  91.401  95.283  1.00 62.52           H  
ATOM    417  HA  ALA B   6      21.123  91.071  92.678  1.00 63.76           H  
ATOM    418  HB1 ALA B   6      22.592  92.741  91.998  1.00 59.94           H  
ATOM    419  HB2 ALA B   6      21.415  93.388  92.846  1.00 59.94           H  
ATOM    420  HB3 ALA B   6      22.838  93.154  93.512  1.00 59.94           H  
ATOM    421  N   GLU B   7      23.265  89.929  92.213  1.00 58.44           N  
ANISOU  421  N   GLU B   7     8370   7764   6072    744   1627    191       N  
ATOM    422  CA  GLU B   7      24.513  89.250  91.965  1.00 63.34           C  
ANISOU  422  CA  GLU B   7     8789   8304   6972   1149   2093    243       C  
ATOM    423  C   GLU B   7      25.489  90.295  91.440  1.00 62.09           C  
ANISOU  423  C   GLU B   7     8103   8827   6663    973   1471    345       C  
ATOM    424  O   GLU B   7      25.244  90.913  90.399  1.00 60.05           O  
ANISOU  424  O   GLU B   7     7705   8960   6151    225   1261     28       O  
ATOM    425  CB  GLU B   7      24.305  88.131  90.940  1.00 67.49           C  
ANISOU  425  CB  GLU B   7     9532   8452   7661    765   3083   -273       C  
ATOM    426  CG  GLU B   7      24.818  86.762  91.305  1.00 94.09           C  
ANISOU  426  CG  GLU B   7    13103  11163  11485   1421   3985   -208       C  
ATOM    427  CD  GLU B   7      25.215  85.955  90.066  1.00111.67           C  
ANISOU  427  CD  GLU B   7    15360  13190  13880   1049   4907   -710       C  
ATOM    428  OE1 GLU B   7      24.791  86.331  88.944  1.00107.93           O  
ANISOU  428  OE1 GLU B   7    14898  13033  13077    145   4885  -1167       O  
ATOM    429  OE2 GLU B   7      25.977  84.963  90.206  1.00110.23           O1-
ANISOU  429  OE2 GLU B   7    15192  12527  14162   1644   5660   -631       O1-
ATOM    430  H   GLU B   7      22.731  89.909  91.539  1.00 70.13           H  
ATOM    431  HA  GLU B   7      24.860  88.871  92.788  1.00 76.00           H  
ATOM    432  HB2 GLU B   7      23.352  88.044  90.778  1.00 80.99           H  
ATOM    433  HB3 GLU B   7      24.746  88.391  90.116  1.00 80.99           H  
ATOM    434  HG2 GLU B   7      25.601  86.855  91.869  1.00112.91           H  
ATOM    435  HG3 GLU B   7      24.123  86.274  91.774  1.00112.91           H  
ATOM    436  N   ASP B   8      26.570  90.517  92.157  1.00 63.62           N  
ANISOU  436  N   ASP B   8     8005   9183   6986   1607   1135    816       N  
ATOM    437  CA  ASP B   8      27.605  91.459  91.746  1.00 63.16           C  
ANISOU  437  CA  ASP B   8     7419   9768   6811   1484    560    961       C  
ATOM    438  C   ASP B   8      28.731  90.698  91.053  1.00 72.52           C  
ANISOU  438  C   ASP B   8     8269  10906   8380   1685   1241    873       C  
ATOM    439  O   ASP B   8      29.428  89.893  91.688  1.00 74.00           O  
ANISOU  439  O   ASP B   8     8365  10761   8989   2431   1614   1210       O  
ATOM    440  CB  ASP B   8      28.142  92.232  92.948  1.00 64.27           C  
ANISOU  440  CB  ASP B   8     7414  10172   6836   1976   -272   1558       C  
ATOM    441  CG  ASP B   8      28.980  93.435  92.544  1.00 78.15           C  
ANISOU  441  CG  ASP B   8     8689  12644   8360   1685  -1011   1683       C  
ATOM    442  OD1 ASP B   8      29.309  93.544  91.348  1.00 85.91           O  
ANISOU  442  OD1 ASP B   8     9402  13900   9340   1206   -801   1345       O  
ATOM    443  OD2 ASP B   8      29.311  94.271  93.419  1.00 87.05           O1-
ANISOU  443  OD2 ASP B   8     9747  14054   9274   1886  -1783   2107       O1-
ATOM    444  H   ASP B   8      26.737  90.127  92.905  1.00 76.35           H  
ATOM    445  HA  ASP B   8      27.231  92.095  91.116  1.00 75.79           H  
ATOM    446  HB2 ASP B   8      27.396  92.550  93.480  1.00 77.13           H  
ATOM    447  HB3 ASP B   8      28.701  91.642  93.479  1.00 77.13           H  
ATOM    448  N   CYS B   9      28.940  90.995  89.773  1.00 82.80           N  
ANISOU  448  N   CYS B   9     9368  12544   9548   1021   1387    459       N  
ATOM    449  CA  CYS B   9      29.783  90.193  88.891  1.00 90.98           C  
ANISOU  449  CA  CYS B   9    10193  13447  10928   1034   2259    195       C  
ATOM    450  C   CYS B   9      30.971  91.027  88.444  1.00 87.67           C  
ANISOU  450  C   CYS B   9     9157  13680  10475    942   1828    349       C  
ATOM    451  O   CYS B   9      30.796  92.054  87.782  1.00 92.13           O  
ANISOU  451  O   CYS B   9     9627  14782  10596    228   1259    169       O  
ATOM    452  CB  CYS B   9      28.988  89.709  87.668  1.00 86.91           C  
ANISOU  452  CB  CYS B   9    10063  12730  10230    195   2951   -501       C  
ATOM    453  SG  CYS B   9      27.298  89.071  88.057  1.00 89.64           S  
ANISOU  453  SG  CYS B   9    11128  12490  10442    -16   3206   -721       S  
ATOM    454  H   CYS B   9      28.594  91.678  89.381  1.00 99.36           H  
ATOM    455  HA  CYS B   9      30.112  89.418  89.372  1.00109.17           H  
ATOM    456  HB2 CYS B   9      28.887  90.450  87.050  1.00104.29           H  
ATOM    457  HB3 CYS B   9      29.482  88.992  87.241  1.00104.29           H  
ATOM    458  HG  CYS B   9      26.658  89.946  88.571  1.00107.57           H  
ATOM    459  N   GLY B  10      32.167  90.584  88.797  1.00109.13           N  
ANISOU  459  N   GLY B  10    11433  16347  13684   1652   2095    712       N  
ATOM    460  CA  GLY B  10      33.397  91.159  88.303  1.00 97.20           C  
ANISOU  460  CA  GLY B  10     9275  15398  12261   1601   1893    841       C  
ATOM    461  C   GLY B  10      33.995  90.299  87.215  1.00112.28           C  
ANISOU  461  C   GLY B  10    11037  17068  14555   1487   3032    408       C  
ATOM    462  O   GLY B  10      33.290  89.539  86.540  1.00110.43           O  
ANISOU  462  O   GLY B  10    11297  16372  14291   1097   3853   -149       O  
ATOM    463  H   GLY B  10      32.291  89.930  89.341  1.00130.96           H  
ATOM    464  HA2 GLY B  10      33.225  92.043  87.943  1.00116.65           H  
ATOM    465  HA3 GLY B  10      34.038  91.236  89.027  1.00116.65           H  
ATOM    466  N   SER B  11      35.319  90.403  87.050  1.00118.90           N  
ANISOU  466  N   SER B  11    11195  18211  15769   1810   3125    666       N  
ATOM    467  CA  SER B  11      35.984  89.661  85.983  1.00130.78           C  
ANISOU  467  CA  SER B  11    12517  19500  17675   1695   4278    238       C  
ATOM    468  C   SER B  11      35.675  88.172  86.075  1.00140.98           C  
ANISOU  468  C   SER B  11    14211  19866  19488   2162   5461     40       C  
ATOM    469  O   SER B  11      35.412  87.517  85.058  1.00144.36           O  
ANISOU  469  O   SER B  11    15005  19930  19916   1662   6476   -625       O  
ATOM    470  CB  SER B  11      37.492  89.886  86.042  1.00126.09           C  
ANISOU  470  CB  SER B  11    11037  19297  17575   2188   4228    687       C  
ATOM    471  OG  SER B  11      38.040  89.314  87.218  1.00134.31           O  
ANISOU  471  OG  SER B  11    11743  20042  19247   3262   4175   1404       O  
ATOM    472  H   SER B  11      35.841  90.887  87.532  1.00142.68           H  
ATOM    473  HA  SER B  11      35.664  89.983  85.125  1.00156.94           H  
ATOM    474  HB2 SER B  11      37.904  89.471  85.268  1.00151.31           H  
ATOM    475  HB3 SER B  11      37.670  90.839  86.042  1.00151.31           H  
ATOM    476  HG  SER B  11      38.870  89.443  87.241  1.00161.18           H  
ATOM    477  N   ASN B  12      35.710  87.619  87.284  1.00141.14           N  
ANISOU  477  N   ASN B  12    14213  19483  19932   3077   5359    615       N  
ATOM    478  CA  ASN B  12      35.473  86.198  87.480  1.00137.04           C  
ANISOU  478  CA  ASN B  12    14066  18041  19960   3605   6452    517       C  
ATOM    479  C   ASN B  12      34.446  85.997  88.590  1.00137.35           C  
ANISOU  479  C   ASN B  12    14650  17740  19799   3883   5992    787       C  
ATOM    480  O   ASN B  12      33.426  85.332  88.378  1.00135.29           O  
ANISOU  480  O   ASN B  12    15081  16938  19387   3572   6565    328       O  
ATOM    481  CB  ASN B  12      36.789  85.489  87.804  1.00149.99           C  
ANISOU  481  CB  ASN B  12    15035  19410  22545   4593   7034   1030       C  
ATOM    482  CG  ASN B  12      37.923  85.873  86.841  1.00151.83           C  
ANISOU  482  CG  ASN B  12    14581  20105  23001   4371   7346    874       C  
ATOM    483  ND2 ASN B  12      39.165  85.775  87.312  1.00151.60           N  
ANISOU  483  ND2 ASN B  12    13827  20184  23589   5081   7143   1505       N  
ATOM    484  OD1 ASN B  12      37.679  86.251  85.693  1.00153.44           O  
ANISOU  484  OD1 ASN B  12    14999  20565  22735   3445   7607    183       O  
ATOM    485  H   ASN B  12      35.871  88.051  88.010  1.00169.37           H  
ATOM    486  HA  ASN B  12      35.116  85.818  86.663  1.00164.44           H  
ATOM    487  HB2 ASN B  12      37.065  85.729  88.702  1.00179.99           H  
ATOM    488  HB3 ASN B  12      36.656  84.530  87.742  1.00179.99           H  
ATOM    489 HD21 ASN B  12      39.833  85.979  86.810  1.00181.92           H  
ATOM    490 HD22 ASN B  12      39.299  85.508  88.118  1.00181.92           H  
ATOM    491  N   LYS B  13      34.680  86.608  89.754  1.00133.42           N  
ANISOU  491  N   LYS B  13    13875  17581  19239   4377   4949   1510       N  
ATOM    492  CA  LYS B  13      33.877  86.322  90.941  1.00126.62           C  
ANISOU  492  CA  LYS B  13    13495  16343  18271   4764   4601   1853       C  
ATOM    493  C   LYS B  13      32.466  86.890  90.814  1.00116.84           C  
ANISOU  493  C   LYS B  13    12890  15212  16292   3976   4175   1403       C  
ATOM    494  O   LYS B  13      32.256  87.975  90.264  1.00100.09           O  
ANISOU  494  O   LYS B  13    10676  13707  13644   3270   3548   1162       O  
ATOM    495  CB  LYS B  13      34.515  86.912  92.200  1.00124.56           C  
ANISOU  495  CB  LYS B  13    12821  16470  18037   5372   3560   2730       C  
ATOM    496  CG  LYS B  13      36.026  86.833  92.305  1.00144.54           C  
ANISOU  496  CG  LYS B  13    14492  19241  21186   5996   3554   3308       C  
ATOM    497  CD  LYS B  13      36.496  87.852  93.331  1.00139.99           C  
ANISOU  497  CD  LYS B  13    13566  19320  20305   6168   2238   4040       C  
ATOM    498  CE  LYS B  13      37.830  87.480  93.969  1.00150.00           C  
ANISOU  498  CE  LYS B  13    14371  20563  22060   6601   2026   4640       C  
ATOM    499  NZ  LYS B  13      37.969  88.141  95.304  1.00145.61           N1+
ANISOU  499  NZ  LYS B  13    14053  20271  21003   6407    843   5066       N1+
ATOM    500  H   LYS B  13      35.299  87.191  89.881  1.00160.11           H  
ATOM    501  HA  LYS B  13      33.808  85.362  91.056  1.00151.94           H  
ATOM    502  HB2 LYS B  13      34.274  87.850  92.249  1.00149.47           H  
ATOM    503  HB3 LYS B  13      34.151  86.447  92.969  1.00149.47           H  
ATOM    504  HG2 LYS B  13      36.290  85.947  92.600  1.00173.45           H  
ATOM    505  HG3 LYS B  13      36.428  87.044  91.447  1.00173.45           H  
ATOM    506  HD2 LYS B  13      36.602  88.713  92.896  1.00167.99           H  
ATOM    507  HD3 LYS B  13      35.834  87.917  94.037  1.00167.99           H  
ATOM    508  HE2 LYS B  13      37.872  86.519  94.095  1.00180.00           H  
ATOM    509  HE3 LYS B  13      38.556  87.780  93.400  1.00180.00           H  
ATOM    510  HZ1 LYS B  13      38.749  87.921  95.672  1.00174.74           H  
ATOM    511  HZ2 LYS B  13      37.932  89.025  95.210  1.00174.74           H  
ATOM    512  HZ3 LYS B  13      37.311  87.879  95.842  1.00174.74           H  
ATOM    513  N   CYS B  14      31.505  86.151  91.366  1.00107.21           N  
ANISOU  513  N   CYS B  14    11971  15020  13744   2685   1372    534       N  
ATOM    514  CA  CYS B  14      30.115  86.572  91.479  1.00 92.70           C  
ANISOU  514  CA  CYS B  14    10629  12882  11710   2366   1295    628       C  
ATOM    515  C   CYS B  14      29.668  86.317  92.911  1.00 86.89           C  
ANISOU  515  C   CYS B  14    10075  12302  10637   2915    971    675       C  
ATOM    516  O   CYS B  14      29.867  85.219  93.435  1.00 82.71           O  
ANISOU  516  O   CYS B  14     9723  11829   9873   3550   1117    859       O  
ATOM    517  CB  CYS B  14      29.210  85.801  90.509  1.00102.66           C  
ANISOU  517  CB  CYS B  14    12482  13691  12833   2119   1801    874       C  
ATOM    518  SG  CYS B  14      29.310  86.254  88.775  1.00105.26           S  
ANISOU  518  SG  CYS B  14    12784  13814  13398   1402   2161    855       S  
ATOM    519  H   CYS B  14      31.644  85.369  91.695  1.00128.65           H  
ATOM    520  HA  CYS B  14      30.041  87.521  91.291  1.00111.24           H  
ATOM    521  HB2 CYS B  14      29.433  84.859  90.572  1.00123.19           H  
ATOM    522  HB3 CYS B  14      28.289  85.931  90.786  1.00123.19           H  
ATOM    523  HG  CYS B  14      29.013  87.411  88.656  1.00126.32           H  
ATOM    524  N   ALA B  15      29.075  87.320  93.546  1.00 69.55           N  
ANISOU  524  N   ALA B  15     7866  10151   8409   2703    585    528       N  
ATOM    525  CA  ALA B  15      28.585  87.161  94.903  1.00 69.75           C  
ANISOU  525  CA  ALA B  15     8110  10307   8084   3187    293    560       C  
ATOM    526  C   ALA B  15      27.261  87.881  95.019  1.00 72.12           C  
ANISOU  526  C   ALA B  15     8779  10281   8341   2758    216    577       C  
ATOM    527  O   ALA B  15      27.042  88.899  94.372  1.00 71.54           O  
ANISOU  527  O   ALA B  15     8560  10082   8539   2158    179    460       O  
ATOM    528  CB  ALA B  15      29.543  87.723  95.942  1.00 81.45           C  
ANISOU  528  CB  ALA B  15     9009  12392   9546   3526   -234    239       C  
ATOM    529  H   ALA B  15      28.946  88.102  93.211  1.00 83.46           H  
ATOM    530  HA  ALA B  15      28.444  86.220  95.089  1.00 83.70           H  
ATOM    531  HB1 ALA B  15      29.165  87.589  96.825  1.00 97.74           H  
ATOM    532  HB2 ALA B  15      30.392  87.260  95.872  1.00 97.74           H  
ATOM    533  HB3 ALA B  15      29.668  88.671  95.776  1.00 97.74           H  
ATOM    534  N   ILE B  16      26.401  87.379  95.869  1.00 61.33           N  
ANISOU  534  N   ILE B  16     7885   8771   6647   3104    225    734       N  
ATOM    535  CA  ILE B  16      25.108  87.993  96.065  1.00 60.51           C  
ANISOU  535  CA  ILE B  16     8121   8357   6512   2753    170    749       C  
ATOM    536  C   ILE B  16      25.259  89.064  97.125  1.00 64.36           C  
ANISOU  536  C   ILE B  16     8333   9140   6982   2781   -330    480       C  
ATOM    537  O   ILE B  16      25.870  88.821  98.167  1.00 78.08           O  
ANISOU  537  O   ILE B  16     9928  11268   8471   3335   -594    385       O  
ATOM    538  CB  ILE B  16      24.069  86.938  96.448  1.00 71.29           C  
ANISOU  538  CB  ILE B  16    10131   9367   7590   3056    508   1001       C  
ATOM    539  CG1 ILE B  16      23.836  86.067  95.204  1.00 82.60           C  
ANISOU  539  CG1 ILE B  16    11780  10486   9118   2822   1038   1149       C  
ATOM    540  CG2 ILE B  16      22.790  87.617  96.911  1.00 61.80           C  
ANISOU  540  CG2 ILE B  16     9212   7912   6357   2784    390    974       C  
ATOM    541  CD1 ILE B  16      23.436  84.672  95.508  1.00 91.35           C  
ANISOU  541  CD1 ILE B  16    13392  11312  10007   3265   1525   1349       C  
ATOM    542  H   ILE B  16      26.540  86.679  96.350  1.00 73.60           H  
ATOM    543  HA  ILE B  16      24.824  88.417  95.240  1.00 72.61           H  
ATOM    544  HB  ILE B  16      24.420  86.387  97.166  1.00 85.55           H  
ATOM    545 HG12 ILE B  16      23.131  86.467  94.671  1.00 99.12           H  
ATOM    546 HG13 ILE B  16      24.657  86.033  94.689  1.00 99.12           H  
ATOM    547 HG21 ILE B  16      22.141  86.937  97.150  1.00 74.16           H  
ATOM    548 HG22 ILE B  16      22.989  88.171  97.682  1.00 74.16           H  
ATOM    549 HG23 ILE B  16      22.445  88.164  96.189  1.00 74.16           H  
ATOM    550 HD11 ILE B  16      23.309  84.192  94.675  1.00109.63           H  
ATOM    551 HD12 ILE B  16      24.136  84.250  96.030  1.00109.63           H  
ATOM    552 HD13 ILE B  16      22.608  84.684  96.013  1.00109.63           H  
ATOM    553  N   ILE B  17      24.750  90.258  96.850  1.00 56.88           N  
ANISOU  553  N   ILE B  17     7290   8037   6284   2207   -445    345       N  
ATOM    554  CA  ILE B  17      24.879  91.364  97.780  1.00 58.61           C  
ANISOU  554  CA  ILE B  17     7236   8480   6552   2129   -844     27       C  
ATOM    555  C   ILE B  17      23.500  91.859  98.158  1.00 62.95           C  
ANISOU  555  C   ILE B  17     8210   8657   7052   1917   -828    116       C  
ATOM    556  O   ILE B  17      22.575  91.728  97.344  1.00 56.80           O  
ANISOU  556  O   ILE B  17     7746   7481   6354   1627   -542    360       O  
ATOM    557  CB  ILE B  17      25.709  92.498  97.204  1.00 60.37           C  
ANISOU  557  CB  ILE B  17     6877   8844   7218   1635   -929   -285       C  
ATOM    558  CG1 ILE B  17      25.138  92.995  95.893  1.00 56.85           C  
ANISOU  558  CG1 ILE B  17     6567   7962   7073   1058   -598    -90       C  
ATOM    559  CG2 ILE B  17      27.129  92.034  96.973  1.00 77.26           C  
ANISOU  559  CG2 ILE B  17     8520  11401   9435   1873   -968   -442       C  
ATOM    560  CD1 ILE B  17      25.760  94.321  95.514  1.00 58.93           C  
ANISOU  560  CD1 ILE B  17     6357   8242   7791    565   -602   -385       C  
ATOM    561  H   ILE B  17      24.325  90.451  96.128  1.00 68.25           H  
ATOM    562  HA  ILE B  17      25.317  91.050  98.586  1.00 70.33           H  
ATOM    563  HB  ILE B  17      25.719  93.232  97.838  1.00 72.44           H  
ATOM    564 HG12 ILE B  17      25.332  92.353  95.192  1.00 68.22           H  
ATOM    565 HG13 ILE B  17      24.181  93.120  95.984  1.00 68.22           H  
ATOM    566 HG21 ILE B  17      27.645  92.768  96.606  1.00 92.72           H  
ATOM    567 HG22 ILE B  17      27.510  91.752  97.819  1.00 92.72           H  
ATOM    568 HG23 ILE B  17      27.120  91.290  96.350  1.00 92.72           H  
ATOM    569 HD11 ILE B  17      25.380  94.618  94.672  1.00 70.72           H  
ATOM    570 HD12 ILE B  17      25.571  94.968  96.210  1.00 70.72           H  
ATOM    571 HD13 ILE B  17      26.719  94.204  95.421  1.00 70.72           H  
HETATM  572  N   SAR B  18      23.332  92.429  99.362  1.00 56.96           N  
ANISOU  572  N   SAR B  18     7443   8047   6153   2054  -1128   -103       N  
HETATM  573  CA  SAR B  18      22.107  93.171  99.616  1.00 53.95           C  
ANISOU  573  CA  SAR B  18     7362   7286   5849   1741  -1094    -68       C  
HETATM  574  C   SAR B  18      22.226  94.519  99.337  1.00 64.18           C  
ANISOU  574  C   SAR B  18     8325   8526   7533   1218  -1163   -300       C  
HETATM  575  O   SAR B  18      23.281  95.074  99.421  1.00 64.43           O  
ANISOU  575  O   SAR B  18     7858   8883   7740   1116  -1333   -639       O  
HETATM  576  CN  SAR B  18      24.360  92.565 100.433  1.00 62.27           C  
ANISOU  576  CN  SAR B  18     7729   9300   6630   2441  -1528   -453       C  
HETATM  577  HN1 SAR B  18      24.545  93.518 100.591  1.00 74.72           H  
HETATM  578  HN2 SAR B  18      25.188  92.112 100.152  1.00 74.72           H  
HETATM  579  HN3 SAR B  18      24.028  92.156 101.257  1.00 74.72           H  
HETATM  580  HA2 SAR B  18      21.253  92.794  99.366  1.00 64.74           H  
HETATM  581  HA3 SAR B  18      22.176  93.132 100.600  1.00 64.74           H  
ATOM    582  N   LEU B  19      21.112  95.174  99.030  1.00 50.60           N  
ANISOU  582  N   LEU B  19     6851   6377   5996    859  -1003   -149       N  
ATOM    583  CA  LEU B  19      21.065  96.623  98.834  1.00 59.92           C  
ANISOU  583  CA  LEU B  19     7787   7394   7588    363   -977   -330       C  
ATOM    584  C   LEU B  19      19.903  97.202  99.619  1.00 59.21           C  
ANISOU  584  C   LEU B  19     8011   7006   7479    303   -987   -319       C  
ATOM    585  O   LEU B  19      18.759  96.874  99.340  1.00 52.23           O  
ANISOU  585  O   LEU B  19     7511   5805   6530    314   -823      5       O  
ATOM    586  CB  LEU B  19      20.904  96.965  97.358  1.00 58.52           C  
ANISOU  586  CB  LEU B  19     7574   6950   7712    -17   -676    -62       C  
ATOM    587  CG  LEU B  19      22.002  96.357  96.500  1.00 60.41           C  
ANISOU  587  CG  LEU B  19     7548   7428   7979     20   -598    -54       C  
ATOM    588  CD1 LEU B  19      21.640  96.526  95.068  1.00 70.09           C  
ANISOU  588  CD1 LEU B  19     8873   8394   9363   -279   -286    271       C  
ATOM    589  CD2 LEU B  19      23.340  97.017  96.798  1.00 59.83           C  
ANISOU  589  CD2 LEU B  19     6909   7654   8168   -103   -717   -506       C  
ATOM    590  H   LEU B  19      20.349  94.792  98.927  1.00 60.72           H  
ATOM    591  HA  LEU B  19      21.888  97.023  99.157  1.00 71.91           H  
ATOM    592  HB2 LEU B  19      20.053  96.623  97.044  1.00 70.23           H  
ATOM    593  HB3 LEU B  19      20.937  97.929  97.250  1.00 70.23           H  
ATOM    594  HG  LEU B  19      22.076  95.408  96.691  1.00 72.50           H  
ATOM    595 HD11 LEU B  19      22.339  96.139  94.518  1.00 84.10           H  
ATOM    596 HD12 LEU B  19      20.798  96.075  94.900  1.00 84.10           H  
ATOM    597 HD13 LEU B  19      21.554  97.473  94.875  1.00 84.10           H  
ATOM    598 HD21 LEU B  19      24.023  96.613  96.239  1.00 71.79           H  
ATOM    599 HD22 LEU B  19      23.274  97.966  96.604  1.00 71.79           H  
ATOM    600 HD23 LEU B  19      23.557  96.885  97.734  1.00 71.79           H  
ATOM    601  N   MET B  20      20.198  98.060 100.592  1.00 54.33           N  
ANISOU  601  N   MET B  20     7200   6507   6935    219  -1161   -717       N  
ATOM    602  CA  MET B  20      19.218  98.467 101.586  1.00 57.73           C  
ANISOU  602  CA  MET B  20     7947   6714   7273    250  -1188   -766       C  
ATOM    603  C   MET B  20      18.641  99.809 101.234  1.00 59.60           C  
ANISOU  603  C   MET B  20     8138   6527   7981   -242   -953   -767       C  
ATOM    604  O   MET B  20      19.391 100.729 100.897  1.00 62.46           O  
ANISOU  604  O   MET B  20     8108   6910   8714   -592   -869  -1027       O  
ATOM    605  CB  MET B  20      19.852  98.552 102.974  1.00 61.12           C  
ANISOU  605  CB  MET B  20     8236   7571   7415    499  -1517  -1237       C  
ATOM    606  CG  MET B  20      18.839  98.701 104.113  1.00 74.60           C  
ANISOU  606  CG  MET B  20    10372   9077   8896    643  -1533  -1261       C  
ATOM    607  SD  MET B  20      19.617  98.354 105.703  1.00 81.59           S  
ANISOU  607  SD  MET B  20    11195  10616   9190   1154  -1963  -1718       S  
ATOM    608  CE  MET B  20      20.026 100.036 106.140  1.00101.47           C  
ANISOU  608  CE  MET B  20    13249  13191  12114    565  -2025  -2383       C  
ATOM    609  H   MET B  20      20.970  98.424 100.697  1.00 65.19           H  
ATOM    610  HA  MET B  20      18.504  97.810 101.618  1.00 69.27           H  
ATOM    611  HB2 MET B  20      20.362  97.742 103.135  1.00 73.34           H  
ATOM    612  HB3 MET B  20      20.442  99.321 103.001  1.00 73.34           H  
ATOM    613  HG2 MET B  20      18.501  99.610 104.128  1.00 89.52           H  
ATOM    614  HG3 MET B  20      18.112  98.071 103.983  1.00 89.52           H  
ATOM    615  HE1 MET B  20      20.469 100.038 107.003  1.00121.76           H  
ATOM    616  HE2 MET B  20      20.616 100.403 105.463  1.00121.76           H  
ATOM    617  HE3 MET B  20      19.209 100.557 106.186  1.00121.76           H  
ATOM    618  N   VAL B  21      17.307  99.912 101.329  1.00 53.05           N  
ANISOU  618  N   VAL B  21     7702   5291   7162   -250   -798   -483       N  
ATOM    619  CA  VAL B  21      16.572 101.186 101.291  1.00 61.14           C  
ANISOU  619  CA  VAL B  21     8759   5881   8589   -602   -563   -459       C  
ATOM    620  C   VAL B  21      15.618 101.251 102.517  1.00 58.84           C  
ANISOU  620  C   VAL B  21     8815   5404   8135   -457   -596   -542       C  
ATOM    621  O   VAL B  21      14.496 100.683 102.496  1.00 54.21           O  
ANISOU  621  O   VAL B  21     8589   4586   7421   -285   -506   -218       O  
ATOM    622  CB  VAL B  21      15.778 101.293 100.005  1.00 58.14           C  
ANISOU  622  CB  VAL B  21     8488   5190   8414   -730   -304     40       C  
ATOM    623  CG1 VAL B  21      15.327 102.732  99.823  1.00 61.82           C  
ANISOU  623  CG1 VAL B  21     8903   5241   9346  -1057     -9     89       C  
ATOM    624  CG2 VAL B  21      16.611 100.806  98.828  1.00 71.07           C  
ANISOU  624  CG2 VAL B  21     9912   7055  10035   -755   -285    179       C  
ATOM    625  H   VAL B  21      16.789  99.232 101.419  1.00 63.66           H  
ATOM    626  HA  VAL B  21      17.195 101.928 101.338  1.00 73.37           H  
ATOM    627  HB  VAL B  21      14.988 100.734 100.069  1.00 69.77           H  
ATOM    628 HG11 VAL B  21      14.819 102.801  98.999  1.00 74.19           H  
ATOM    629 HG12 VAL B  21      14.772 102.986 100.577  1.00 74.19           H  
ATOM    630 HG13 VAL B  21      16.109 103.304  99.778  1.00 74.19           H  
ATOM    631 HG21 VAL B  21      16.086 100.883  98.016  1.00 85.28           H  
ATOM    632 HG22 VAL B  21      17.410 101.353  98.759  1.00 85.28           H  
ATOM    633 HG23 VAL B  21      16.857  99.880  98.978  1.00 85.28           H  
TER     634      VAL B  21 
HETATM  635  N   ORN C   1      29.084  93.864  86.329  1.00 57.74           N  
ANISOU  635  N   ORN C   1     6538   7257   8143   1193   1211   -328       N  
HETATM  636  CA  ORN C   1      27.751  94.464  86.298  1.00 60.92           C  
ANISOU  636  CA  ORN C   1     7377   7627   8142   1006    787   -103       C  
HETATM  637  C   ORN C   1      26.972  93.806  87.461  1.00 60.71           C  
ANISOU  637  C   ORN C   1     7347   7483   8239   1470    454      3       C  
HETATM  638  O   ORN C   1      27.413  92.814  88.077  1.00 64.76           O  
ANISOU  638  O   ORN C   1     7632   7908   9067   1869    592    -87       O  
HETATM  639  CB  ORN C   1      26.981  94.111  85.006  1.00 63.94           C  
ANISOU  639  CB  ORN C   1     8293   7942   8060    611   1037   -181       C  
HETATM  640  CG  ORN C   1      27.234  94.970  83.802  1.00 69.72           C  
ANISOU  640  CG  ORN C   1     9268   8771   8452     52   1222   -189       C  
HETATM  641  CD  ORN C   1      26.674  96.361  83.939  1.00 58.67           C  
ANISOU  641  CD  ORN C   1     8039   7407   6844   -177    684     70       C  
HETATM  642  NE  ORN C   1      25.225  96.379  83.817  1.00 65.20           N  
ANISOU  642  NE  ORN C   1     9314   8121   7337   -233    304    174       N  
HETATM  643  HA  ORN C   1      27.857  95.535  86.492  1.00 73.10           H  
HETATM  644  HB2 ORN C   1      25.905  94.179  85.221  1.00 76.73           H  
HETATM  645  HB3 ORN C   1      27.240  93.079  84.733  1.00 76.73           H  
HETATM  646  HG2 ORN C   1      28.315  95.033  83.631  1.00 83.66           H  
HETATM  647  HG3 ORN C   1      26.768  94.493  82.932  1.00 83.66           H  
HETATM  648  HD2 ORN C   1      27.094  96.983  83.143  1.00 70.40           H  
HETATM  649  HD3 ORN C   1      26.950  96.755  84.921  1.00 70.40           H  
HETATM  650  HE1 ORN C   1      24.847  96.344  82.873  1.00 78.24           H  
HETATM  651  H1  ORN C   1      29.498  93.847  87.264  1.00 69.29           H  
HETATM  652  H2  ORN C   1      29.097  92.892  86.010  1.00 69.29           H  
HETATM  653  H3  ORN C   1      29.762  94.352  85.739  1.00 69.29           H  
ATOM    654  N   LEU C   2      25.766  94.383  87.738  1.00 51.38           N  
ANISOU  654  N   LEU C   2     6439   6293   6789   1398      6    195       N  
ATOM    655  CA  LEU C   2      24.885  93.797  88.744  1.00 58.26           C  
ANISOU  655  CA  LEU C   2     7354   7075   7706   1754   -260    296       C  
ATOM    656  C   LEU C   2      23.794  93.050  88.002  1.00 61.29           C  
ANISOU  656  C   LEU C   2     8161   7327   7799   1561   -121    239       C  
ATOM    657  O   LEU C   2      23.366  93.561  86.974  1.00 52.04           O  
ANISOU  657  O   LEU C   2     7290   6174   6309   1154   -117    215       O  
ATOM    658  CB  LEU C   2      24.190  94.870  89.585  1.00 53.42           C  
ANISOU  658  CB  LEU C   2     6728   6553   7016   1825   -834    495       C  
ATOM    659  CG  LEU C   2      25.044  95.812  90.423  1.00 68.69           C  
ANISOU  659  CG  LEU C   2     8287   8612   9202   2008  -1118    571       C  
ATOM    660  CD1 LEU C   2      24.121  96.926  90.973  1.00 64.70           C  
ANISOU  660  CD1 LEU C   2     7874   8181   8527   1950  -1647    723       C  
ATOM    661  CD2 LEU C   2      25.806  95.056  91.512  1.00 75.10           C  
ANISOU  661  CD2 LEU C   2     8757   9393  10385   2506  -1071    550       C  
ATOM    662  H   LEU C   2      25.422  95.039  87.299  1.00 61.65           H  
ATOM    663  HA  LEU C   2      25.372  93.187  89.320  1.00 69.91           H  
ATOM    664  HB2 LEU C   2      23.669  95.426  88.984  1.00 64.10           H  
ATOM    665  HB3 LEU C   2      23.587  94.421  90.198  1.00 64.10           H  
ATOM    666  HG  LEU C   2      25.699  96.233  89.844  1.00 82.43           H  
ATOM    667 HD11 LEU C   2      24.650  97.537  91.510  1.00 77.64           H  
ATOM    668 HD12 LEU C   2      23.722  97.402  90.228  1.00 77.64           H  
ATOM    669 HD13 LEU C   2      23.428  96.521  91.517  1.00 77.64           H  
ATOM    670 HD21 LEU C   2      26.336  95.688  92.022  1.00 90.12           H  
ATOM    671 HD22 LEU C   2      25.168  94.614  92.093  1.00 90.12           H  
ATOM    672 HD23 LEU C   2      26.384  94.399  91.094  1.00 90.12           H  
ATOM    673  N   VAL C   3      23.248  91.949  88.497  1.00 57.22           N  
ANISOU  673  N   VAL C   3     9827   6727   5185   2322    692    273       N  
ATOM    674  CA  VAL C   3      22.104  91.202  87.979  1.00 62.30           C  
ANISOU  674  CA  VAL C   3    10837   7120   5714   2323    491    288       C  
ATOM    675  C   VAL C   3      20.998  91.175  89.075  1.00 59.30           C  
ANISOU  675  C   VAL C   3    10330   6922   5279   1954    290    322       C  
ATOM    676  O   VAL C   3      21.172  90.550  90.137  1.00 53.84           O  
ANISOU  676  O   VAL C   3     9532   6360   4565   1825    142    456       O  
ATOM    677  CB  VAL C   3      22.496  89.809  87.564  1.00 68.14           C  
ANISOU  677  CB  VAL C   3    11876   7568   6445   2554    380    421       C  
ATOM    678  CG1 VAL C   3      21.306  89.107  87.006  1.00 62.77           C  
ANISOU  678  CG1 VAL C   3    11583   6625   5641   2472    162    382       C  
ATOM    679  CG2 VAL C   3      23.552  89.897  86.534  1.00 65.21           C  
ANISOU  679  CG2 VAL C   3    11647   6981   6150   2924    668    404       C  
ATOM    680  H   VAL C   3      23.536  91.664  89.256  1.00 68.66           H  
ATOM    681  HA  VAL C   3      21.749  91.661  87.202  1.00 74.76           H  
ATOM    682  HB  VAL C   3      22.832  89.312  88.327  1.00 81.76           H  
ATOM    683 HG11 VAL C   3      21.564  88.211  86.740  1.00 75.32           H  
ATOM    684 HG12 VAL C   3      20.616  89.066  87.687  1.00 75.32           H  
ATOM    685 HG13 VAL C   3      20.981  89.601  86.236  1.00 75.32           H  
ATOM    686 HG21 VAL C   3      23.806  89.000  86.265  1.00 78.26           H  
ATOM    687 HG22 VAL C   3      23.208  90.386  85.771  1.00 78.26           H  
ATOM    688 HG23 VAL C   3      24.318  90.360  86.907  1.00 78.26           H  
ATOM    689  N   PHE C   4      19.920  91.917  88.864  1.00 54.23           N  
ANISOU  689  N   PHE C   4     9683   6296   4626   1810    331    232       N  
ATOM    690  CA  PHE C   4      18.785  91.798  89.770  1.00 56.00           C  
ANISOU  690  CA  PHE C   4     9811   6609   4856   1497    204    294       C  
ATOM    691  C   PHE C   4      17.903  90.620  89.335  1.00 62.78           C  
ANISOU  691  C   PHE C   4    10914   7216   5723   1475    -88    362       C  
ATOM    692  O   PHE C   4      18.027  90.093  88.242  1.00 55.89           O  
ANISOU  692  O   PHE C   4    10327   6105   4803   1674   -189    322       O  
ATOM    693  CB  PHE C   4      17.984  93.064  89.797  1.00 52.41           C  
ANISOU  693  CB  PHE C   4     9199   6263   4453   1367    421    221       C  
ATOM    694  CG  PHE C   4      18.770  94.212  90.259  1.00 56.05           C  
ANISOU  694  CG  PHE C   4     9474   6922   4900   1317    746    118       C  
ATOM    695  CD1 PHE C   4      19.607  94.866  89.396  1.00 56.76           C  
ANISOU  695  CD1 PHE C   4     9585   6969   5010   1550    966      8       C  
ATOM    696  CD2 PHE C   4      18.716  94.616  91.574  1.00 60.35           C  
ANISOU  696  CD2 PHE C   4     9865   7670   5397   1014    854    118       C  
ATOM    697  CE1 PHE C   4      20.348  95.951  89.841  1.00 61.82           C  
ANISOU  697  CE1 PHE C   4    10040   7777   5673   1444   1292   -116       C  
ATOM    698  CE2 PHE C   4      19.481  95.699  92.006  1.00 60.78           C  
ANISOU  698  CE2 PHE C   4     9783   7899   5414    898   1146    -23       C  
ATOM    699  CZ  PHE C   4      20.303  96.340  91.093  1.00 52.85           C  
ANISOU  699  CZ  PHE C   4     8751   6849   4480   1111   1355   -144       C  
ATOM    700  H   PHE C   4      19.819  92.482  88.224  1.00 65.08           H  
ATOM    701  HA  PHE C   4      19.107  91.622  90.668  1.00 67.19           H  
ATOM    702  HB2 PHE C   4      17.666  93.257  88.902  1.00 62.90           H  
ATOM    703  HB3 PHE C   4      17.233  92.951  90.401  1.00 62.90           H  
ATOM    704  HD1 PHE C   4      19.655  94.604  88.505  1.00 68.11           H  
ATOM    705  HD2 PHE C   4      18.160  94.172  92.173  1.00 72.43           H  
ATOM    706  HE1 PHE C   4      20.910  96.393  89.247  1.00 74.19           H  
ATOM    707  HE2 PHE C   4      19.443  95.983  92.891  1.00 72.94           H  
ATOM    708  HZ  PHE C   4      20.813  97.068  91.367  1.00 63.42           H  
ATOM    709  N  APHE C   5      17.035  90.195  90.229  0.61 61.47           N  
ANISOU  709  N  APHE C   5    10669   7077   5610   1207   -192    456       N  
ATOM    710  N  BPHE C   5      17.008  90.248  90.237  0.39 58.74           N  
ANISOU  710  N  BPHE C   5    10312   6738   5266   1201   -185    454       N  
ATOM    711  CA APHE C   5      16.212  89.017  90.006  0.61 57.14           C  
ANISOU  711  CA APHE C   5    10314   6283   5113   1105   -448    515       C  
ATOM    712  CA BPHE C   5      16.165  89.065  90.160  0.39 59.21           C  
ANISOU  712  CA BPHE C   5    10545   6570   5383   1076   -433    525       C  
ATOM    713  C  APHE C   5      14.755  89.435  90.001  0.61 62.59           C  
ANISOU  713  C  APHE C   5    10823   6991   5967    868   -499    525       C  
ATOM    714  C  BPHE C   5      14.742  89.561  89.938  0.39 58.88           C  
ANISOU  714  C  BPHE C   5    10338   6535   5497    878   -487    516       C  
ATOM    715  O  APHE C   5      14.300  90.192  90.868  0.61 51.19           O  
ANISOU  715  O  APHE C   5     9119   5722   4610    703   -297    577       O  
ATOM    716  O  BPHE C   5      14.319  90.562  90.530  0.39 44.67           O  
ANISOU  716  O  BPHE C   5     8271   4922   3781    765   -268    542       O  
ATOM    717  CB APHE C   5      16.468  87.983  91.085  0.61 70.18           C  
ANISOU  717  CB APHE C   5    12027   7897   6742   1012   -489    664       C  
ATOM    718  CB BPHE C   5      16.327  88.282  91.478  0.39 62.64           C  
ANISOU  718  CB BPHE C   5    10968   7034   5797    935   -434    678       C  
ATOM    719  CG APHE C   5      17.878  87.445  91.089  0.61 77.90           C  
ANISOU  719  CG APHE C   5    13130   8857   7610   1287   -464    730       C  
ATOM    720  CG BPHE C   5      15.578  86.974  91.571  0.39 66.90           C  
ANISOU  720  CG BPHE C   5    11707   7295   6417    792   -605    763       C  
ATOM    721  CD1APHE C   5      18.545  87.189  89.890  0.61 84.19           C  
ANISOU  721  CD1APHE C   5    14159   9453   8378   1577   -458    660       C  
ATOM    722  CD2APHE C   5      18.534  87.179  92.291  0.61 89.99           C  
ANISOU  722  CD2APHE C   5    14558  10567   9068   1274   -436    891       C  
ATOM    723  CD1BPHE C   5      14.209  86.948  91.777  0.39 53.37           C  
ANISOU  723  CD1BPHE C   5     9871   5516   4892    501   -649    783       C  
ATOM    724  CD2BPHE C   5      16.272  85.763  91.545  0.39 64.46           C  
ANISOU  724  CD2BPHE C   5    11686   6774   6032    945   -667    850       C  
ATOM    725  CE1APHE C   5      19.834  86.681  89.894  0.61 77.75           C  
ANISOU  725  CE1APHE C   5    13410   8595   7537   1864   -374    770       C  
ATOM    726  CE2APHE C   5      19.825  86.664  92.298  0.61 75.05           C  
ANISOU  726  CE2APHE C   5    12700   8687   7130   1559   -435   1014       C  
ATOM    727  CE1BPHE C   5      13.545  85.754  91.901  0.39 56.29           C  
ANISOU  727  CE1BPHE C   5    10403   5611   5374    324   -771    845       C  
ATOM    728  CE2BPHE C   5      15.605  84.555  91.676  0.39 59.94           C  
ANISOU  728  CE2BPHE C   5    11336   5899   5538    790   -756    917       C  
ATOM    729  CZ APHE C   5      20.467  86.419  91.104  0.61 77.01           C  
ANISOU  729  CZ APHE C   5    13118   8716   7426   1860   -379    963       C  
ATOM    730  CZ BPHE C   5      14.245  84.554  91.848  0.39 62.11           C  
ANISOU  730  CZ BPHE C   5    11487   6110   6001    457   -817    895       C  
ATOM    731  H  APHE C   5      16.899  90.575  90.989  0.61 73.77           H  
ATOM    732  H  BPHE C   5      16.863  90.701  90.954  0.39 70.48           H  
ATOM    733  HA APHE C   5      16.426  88.627  89.144  0.61 68.56           H  
ATOM    734  HB2APHE C   5      16.302  88.387  91.951  0.61 84.22           H  
ATOM    735  HB3APHE C   5      15.866  87.235  90.951  0.61 84.22           H  
ATOM    736  HA BPHE C   5      16.433  88.504  89.415  0.39 71.06           H  
ATOM    737  HB2BPHE C   5      17.269  88.085  91.602  0.39 75.16           H  
ATOM    738  HB3BPHE C   5      16.017  88.844  92.206  0.39 75.16           H  
ATOM    739  HD1APHE C   5      18.119  87.359  89.081  0.61101.03           H  
ATOM    740  HD2APHE C   5      18.098  87.339  93.097  0.61107.99           H  
ATOM    741  HD1BPHE C   5      13.732  87.746  91.811  0.39 64.05           H  
ATOM    742  HD2BPHE C   5      17.195  85.766  91.426  0.39 77.35           H  
ATOM    743  HE1APHE C   5      20.273  86.514  89.091  0.61 93.30           H  
ATOM    744  HE2APHE C   5      20.256  86.492  93.105  0.61 90.06           H  
ATOM    745  HE1BPHE C   5      12.623  85.747  92.020  0.39 67.55           H  
ATOM    746  HE2BPHE C   5      16.074  83.753  91.637  0.39 71.92           H  
ATOM    747  HZ APHE C   5      21.334  86.083  91.108  0.61 92.41           H  
ATOM    748  HZ BPHE C   5      13.790  83.747  91.931  0.39 74.53           H  
ATOM    749  N   ALA C   6      14.016  88.918  89.049  1.00 53.30           N  
ANISOU  749  N   ALA C   6     9788   5624   4838    837   -764    486       N  
ATOM    750  CA  ALA C   6      12.609  89.192  88.968  1.00 47.63           C  
ANISOU  750  CA  ALA C   6     8827   4934   4337    615   -882    537       C  
ATOM    751  C   ALA C   6      11.952  87.932  88.497  1.00 53.06           C  
ANISOU  751  C   ALA C   6     9712   5362   5085    431  -1236    516       C  
ATOM    752  O   ALA C   6      12.605  87.055  87.920  1.00 54.92           O  
ANISOU  752  O   ALA C   6    10354   5376   5137    537  -1362    426       O  
ATOM    753  CB  ALA C   6      12.302  90.311  87.997  1.00 50.20           C  
ANISOU  753  CB  ALA C   6     9044   5378   4653    781   -883    497       C  
ATOM    754  H   ALA C   6      14.313  88.364  88.462  1.00 63.96           H  
ATOM    755  HA  ALA C   6      12.262  89.425  89.843  1.00 57.16           H  
ATOM    756  HB1 ALA C   6      11.344  90.457  87.978  1.00 60.24           H  
ATOM    757  HB2 ALA C   6      12.755  91.116  88.291  1.00 60.24           H  
ATOM    758  HB3 ALA C   6      12.617  90.058  87.115  1.00 60.24           H  
ATOM    759  N   GLU C   7      10.661  87.844  88.737  1.00 50.40           N  
ANISOU  759  N   GLU C   7     9090   5027   5032    142  -1359    601       N  
ATOM    760  CA  GLU C   7       9.849  86.832  88.067  1.00 60.39           C  
ANISOU  760  CA  GLU C   7    10480   6071   6393   -102  -1761    544       C  
ATOM    761  C   GLU C   7       8.952  87.526  87.081  1.00 56.03           C  
ANISOU  761  C   GLU C   7     9697   5662   5928   -120  -2057    544       C  
ATOM    762  O   GLU C   7       8.311  88.521  87.418  1.00 55.58           O  
ANISOU  762  O   GLU C   7     9182   5829   6105   -112  -1905    695       O  
ATOM    763  CB  GLU C   7       9.014  86.021  89.031  1.00 56.37           C  
ANISOU  763  CB  GLU C   7     9796   5423   6200   -462  -1723    653       C  
ATOM    764  CG  GLU C   7       9.845  85.139  89.884  1.00 70.19           C  
ANISOU  764  CG  GLU C   7    11856   6994   7820   -427  -1496    679       C  
ATOM    765  CD  GLU C   7       9.013  84.000  90.404  1.00 64.74           C  
ANISOU  765  CD  GLU C   7    11177   6027   7393   -787  -1532    735       C  
ATOM    766  OE1 GLU C   7       7.852  84.231  90.821  1.00 75.59           O  
ANISOU  766  OE1 GLU C   7    12135   7445   9140  -1060  -1504    841       O  
ATOM    767  OE2 GLU C   7       9.499  82.866  90.321  1.00 74.96           O1-
ANISOU  767  OE2 GLU C   7    12900   7028   8555   -792  -1557    679       O1-
ATOM    768  H   GLU C   7      10.226  88.352  89.277  1.00 60.48           H  
ATOM    769  HA  GLU C   7      10.428  86.225  87.580  1.00 72.46           H  
ATOM    770  HB2 GLU C   7       8.521  86.624  89.609  1.00 67.65           H  
ATOM    771  HB3 GLU C   7       8.400  85.464  88.528  1.00 67.65           H  
ATOM    772  HG2 GLU C   7      10.576  84.774  89.361  1.00 84.23           H  
ATOM    773  HG3 GLU C   7      10.185  85.644  90.640  1.00 84.23           H  
ATOM    774  N   ASP C   8       8.913  86.980  85.878  1.00 58.66           N  
ANISOU  774  N   ASP C   8    10384   5850   6054   -136  -2465    391       N  
ATOM    775  CA  ASP C   8       8.079  87.480  84.817  1.00 61.57           C  
ANISOU  775  CA  ASP C   8    10612   6359   6425   -157  -2870    394       C  
ATOM    776  C   ASP C   8       6.826  86.611  84.872  1.00 66.46           C  
ANISOU  776  C   ASP C   8    10995   6886   7370   -641  -3268    413       C  
ATOM    777  O   ASP C   8       6.897  85.411  84.601  1.00 69.04           O  
ANISOU  777  O   ASP C   8    11729   6916   7586   -883  -3487    240       O  
ATOM    778  CB  ASP C   8       8.826  87.368  83.485  1.00 62.28           C  
ANISOU  778  CB  ASP C   8    11320   6318   6026     89  -3078    199       C  
ATOM    779  CG  ASP C   8       8.246  88.242  82.421  1.00 74.54           C  
ANISOU  779  CG  ASP C   8    12774   8085   7464    228  -3397    246       C  
ATOM    780  OD1 ASP C   8       7.181  88.840  82.678  1.00 88.88           O  
ANISOU  780  OD1 ASP C   8    13987  10155   9630    113  -3513    448       O  
ATOM    781  OD2 ASP C   8       8.869  88.350  81.334  1.00 74.80           O1-
ANISOU  781  OD2 ASP C   8    13342   8020   7058    489  -3493    111       O1-
ATOM    782  H   ASP C   8       9.380  86.294  85.651  1.00 70.39           H  
ATOM    783  HA  ASP C   8       7.839  88.406  84.979  1.00 73.89           H  
ATOM    784  HB2 ASP C   8       9.750  87.631  83.618  1.00 74.74           H  
ATOM    785  HB3 ASP C   8       8.784  86.450  83.175  1.00 74.74           H  
ATOM    786  N   CYS C   9       5.698  87.198  85.254  1.00 68.12           N  
ANISOU  786  N   CYS C   9    10546   7318   8020   -791  -3303    629       N  
ATOM    787  CA  CYS C   9       4.500  86.445  85.590  1.00 72.75           C  
ANISOU  787  CA  CYS C   9    10755   7823   9063  -1274  -3552    696       C  
ATOM    788  C   CYS C   9       3.370  86.811  84.647  1.00 78.05           C  
ANISOU  788  C   CYS C   9    11019   8724   9914  -1412  -4130    788       C  
ATOM    789  O   CYS C   9       3.133  87.991  84.377  1.00 77.35           O  
ANISOU  789  O   CYS C   9    10587   8932   9872  -1116  -4089    983       O  
ATOM    790  CB  CYS C   9       4.069  86.708  87.031  1.00 71.29           C  
ANISOU  790  CB  CYS C   9    10075   7662   9348  -1362  -3028    930       C  
ATOM    791  SG  CYS C   9       5.210  86.086  88.298  1.00 78.39           S  
ANISOU  791  SG  CYS C   9    11415   8312  10057  -1288  -2452    869       S  
ATOM    792  H   CYS C   9       5.602  88.049  85.328  1.00 81.75           H  
ATOM    793  HA  CYS C   9       4.681  85.497  85.495  1.00 87.30           H  
ATOM    794  HB2 CYS C   9       3.985  87.666  87.158  1.00 85.54           H  
ATOM    795  HB3 CYS C   9       3.209  86.284  87.178  1.00 85.54           H  
ATOM    796  N   GLY C  10       2.669  85.786  84.163  1.00 83.56           N  
ANISOU  796  N   GLY C  10    11753   9279  10717  -1875  -4666    656       N  
ATOM    797  CA  GLY C  10       1.594  85.962  83.225  1.00 90.80           C  
ANISOU  797  CA  GLY C  10    12292  10430  11778  -2084  -5351    725       C  
ATOM    798  C   GLY C  10       0.737  84.719  83.140  1.00112.97           C  
ANISOU  798  C   GLY C  10    15009  13037  14879  -2738  -5810    584       C  
ATOM    799  O   GLY C  10       1.245  83.609  82.936  1.00103.74           O  
ANISOU  799  O   GLY C  10    14510  11502  13403  -2973  -5884    271       O  
ATOM    800  H   GLY C  10       2.810  84.964  84.376  1.00100.27           H  
ATOM    801  HA2 GLY C  10       1.038  86.707  83.501  1.00108.96           H  
ATOM    802  HA3 GLY C  10       1.956  86.152  82.345  1.00108.96           H  
ATOM    803  N   SER C  11      -0.573  84.915  83.291  1.00122.73           N  
ANISOU  803  N   SER C  11    15397  14491  16744  -3035  -6083    830       N  
ATOM    804  CA  SER C  11      -1.567  83.845  83.246  1.00125.71           C  
ANISOU  804  CA  SER C  11    15501  14717  17544  -3722  -6532    732       C  
ATOM    805  C   SER C  11      -1.086  82.629  84.039  1.00117.78           C  
ANISOU  805  C   SER C  11    14993  13203  16555  -4003  -6090    501       C  
ATOM    806  O   SER C  11      -0.954  81.517  83.524  1.00128.66           O  
ANISOU  806  O   SER C  11    16940  14266  17678  -4394  -6411    165       O  
ATOM    807  CB  SER C  11      -1.902  83.471  81.799  1.00126.51           C  
ANISOU  807  CB  SER C  11    15878  14925  17265  -4018  -7484    499       C  
ATOM    808  OG  SER C  11      -0.842  82.742  81.217  1.00134.12           O  
ANISOU  808  OG  SER C  11    17924  15543  17490  -3994  -7514     94       O  
ATOM    809  H   SER C  11      -0.922  85.689  83.426  1.00147.28           H  
ATOM    810  HA  SER C  11      -2.383  84.163  83.663  1.00150.85           H  
ATOM    811  HB2 SER C  11      -2.704  82.925  81.791  1.00151.81           H  
ATOM    812  HB3 SER C  11      -2.047  84.282  81.288  1.00151.81           H  
ATOM    813  HG  SER C  11      -0.705  82.036  81.652  1.00160.94           H  
ATOM    814  N   ASN C  12      -0.801  82.869  85.317  1.00116.58           N  
ANISOU  814  N   ASN C  12    14671  12953  16671  -3781  -5311    696       N  
ATOM    815  CA  ASN C  12      -0.543  81.780  86.261  1.00125.12           C  
ANISOU  815  CA  ASN C  12    16073  13580  17887  -4029  -4838    590       C  
ATOM    816  C   ASN C  12       0.662  80.939  85.834  1.00117.14           C  
ANISOU  816  C   ASN C  12    16082  12232  16195  -3934  -4820    248       C  
ATOM    817  O   ASN C  12       0.640  79.705  85.889  1.00102.24           O  
ANISOU  817  O   ASN C  12    14594   9927  14327  -4327  -4824     38       O  
ATOM    818  CB  ASN C  12      -1.797  80.922  86.411  1.00133.35           C  
ANISOU  818  CB  ASN C  12    16631  14447  19587  -4712  -5085    589       C  
ATOM    819  CG  ASN C  12      -3.050  81.775  86.577  1.00138.60           C  
ANISOU  819  CG  ASN C  12    16218  15477  20965  -4796  -5208    955       C  
ATOM    820  ND2 ASN C  12      -4.178  81.302  86.052  1.00133.42           N  
ANISOU  820  ND2 ASN C  12    15048  14868  20777  -5370  -5813    931       N  
ATOM    821  OD1 ASN C  12      -2.989  82.865  87.159  1.00140.87           O  
ANISOU  821  OD1 ASN C  12    16139  15998  21387  -4349  -4752   1264       O  
ATOM    822  H   ASN C  12      -0.751  83.654  85.664  1.00139.90           H  
ATOM    823  HA  ASN C  12      -0.342  82.163  87.129  1.00150.14           H  
ATOM    824  HB2 ASN C  12      -1.906  80.375  85.617  1.00160.02           H  
ATOM    825  HB3 ASN C  12      -1.707  80.359  87.195  1.00160.02           H  
ATOM    826 HD21 ASN C  12      -4.908  81.752  86.124  1.00160.10           H  
ATOM    827 HD22 ASN C  12      -4.177  80.546  85.641  1.00160.10           H  
ATOM    828  N   LYS C  13       1.717  81.629  85.395  1.00 93.84           N  
ANISOU  828  N   LYS C  13    13547   9435  12674  -3397  -4745    208       N  
ATOM    829  CA  LYS C  13       2.983  81.017  85.011  1.00 91.30           C  
ANISOU  829  CA  LYS C  13    14141   8814  11734  -3178  -4618    -45       C  
ATOM    830  C   LYS C  13       4.048  82.062  85.282  1.00 84.33           C  
ANISOU  830  C   LYS C  13    13341   8157  10542  -2537  -4199     87       C  
ATOM    831  O   LYS C  13       3.968  83.168  84.749  1.00 83.01           O  
ANISOU  831  O   LYS C  13    12916   8344  10278  -2270  -4369    179       O  
ATOM    832  CB  LYS C  13       2.992  80.609  83.545  1.00 95.79           C  
ANISOU  832  CB  LYS C  13    15243   9296  11857  -3354  -5253   -349       C  
ATOM    833  CG  LYS C  13       2.772  79.131  83.341  1.00115.30           C  
ANISOU  833  CG  LYS C  13    18210  11277  14322  -3898  -5406   -632       C  
ATOM    834  CD  LYS C  13       2.304  78.814  81.937  1.00109.68           C  
ANISOU  834  CD  LYS C  13    17835  10547  13290  -4269  -6177   -922       C  
ATOM    835  CE  LYS C  13       0.940  79.442  81.665  1.00118.57           C  
ANISOU  835  CE  LYS C  13    18067  12126  14857  -4590  -6798   -765       C  
ATOM    836  NZ  LYS C  13       0.128  78.613  80.743  1.00122.21           N1+
ANISOU  836  NZ  LYS C  13    18650  12514  15269  -5169  -7397  -1025       N1+
ATOM    837  H   LYS C  13       1.718  82.485  85.310  1.00112.61           H  
ATOM    838  HA  LYS C  13       3.157  80.236  85.560  1.00109.56           H  
ATOM    839  HB2 LYS C  13       2.284  81.083  83.081  1.00114.95           H  
ATOM    840  HB3 LYS C  13       3.852  80.839  83.159  1.00114.95           H  
ATOM    841  HG2 LYS C  13       3.606  78.660  83.495  1.00138.36           H  
ATOM    842  HG3 LYS C  13       2.094  78.822  83.963  1.00138.36           H  
ATOM    843  HD2 LYS C  13       2.939  79.172  81.297  1.00131.61           H  
ATOM    844  HD3 LYS C  13       2.224  77.853  81.832  1.00131.61           H  
ATOM    845  HE2 LYS C  13       0.456  79.529  82.501  1.00142.28           H  
ATOM    846  HE3 LYS C  13       1.066  80.314  81.258  1.00142.28           H  
ATOM    847  HZ1 LYS C  13      -0.661  79.001  80.601  1.00146.65           H  
ATOM    848  HZ2 LYS C  13       0.549  78.522  79.964  1.00146.65           H  
ATOM    849  HZ3 LYS C  13      -0.005  77.807  81.096  1.00146.65           H  
ATOM    850  N   CYS C  14       5.018  81.744  86.130  1.00 56.46           N  
ANISOU  850  N   CYS C  14     9860   4160   7432   -594   -594   -847       N  
ATOM    851  CA  CYS C  14       6.062  82.696  86.461  1.00 66.43           C  
ANISOU  851  CA  CYS C  14    11058   5688   8493   -331   -622   -682       C  
ATOM    852  C   CYS C  14       7.370  82.083  85.998  1.00 53.47           C  
ANISOU  852  C   CYS C  14     9663   3874   6778   -199   -315   -669       C  
ATOM    853  O   CYS C  14       7.508  80.883  85.988  1.00 56.53           O  
ANISOU  853  O   CYS C  14    10183   3965   7331   -202    -39   -682       O  
ATOM    854  CB  CYS C  14       6.089  82.995  87.971  1.00 62.74           C  
ANISOU  854  CB  CYS C  14    10276   5438   8124    -99   -556   -404       C  
ATOM    855  SG  CYS C  14       4.709  83.985  88.594  1.00 87.47           S  
ANISOU  855  SG  CYS C  14    13047   8872  11314   -189   -910   -455       S  
ATOM    856  H   CYS C  14       5.091  80.985  86.526  1.00 67.75           H  
ATOM    857  HA  CYS C  14       5.917  83.525  85.980  1.00 79.71           H  
ATOM    858  HB2 CYS C  14       6.083  82.152  88.451  1.00 75.29           H  
ATOM    859  HB3 CYS C  14       6.907  83.476  88.174  1.00 75.29           H  
ATOM    860  N   ALA C  15       8.305  82.910  85.557  1.00 59.43           N  
ANISOU  860  N   ALA C  15    10479   4802   7301   -100   -370   -670       N  
ATOM    861  CA  ALA C  15       9.621  82.398  85.225  1.00 54.13           C  
ANISOU  861  CA  ALA C  15     9958   4017   6594     55    -46   -675       C  
ATOM    862  C   ALA C  15      10.627  83.404  85.758  1.00 48.79           C  
ANISOU  862  C   ALA C  15     9091   3628   5818    295    -77   -496       C  
ATOM    863  O   ALA C  15      10.447  84.616  85.588  1.00 50.62           O  
ANISOU  863  O   ALA C  15     9262   4104   5866    224   -379   -489       O  
ATOM    864  CB  ALA C  15       9.783  82.227  83.716  1.00 68.59           C  
ANISOU  864  CB  ALA C  15    12134   5715   8213   -168    -17   -963       C  
ATOM    865  H   ALA C  15       8.205  83.756  85.442  1.00 71.32           H  
ATOM    866  HA  ALA C  15       9.766  81.543  85.660  1.00 64.96           H  
ATOM    867  HB1 ALA C  15      10.671  81.885  83.531  1.00 82.31           H  
ATOM    868  HB2 ALA C  15       9.114  81.602  83.396  1.00 82.31           H  
ATOM    869  HB3 ALA C  15       9.664  83.088  83.286  1.00 82.31           H  
ATOM    870  N   ILE C  16      11.702  82.906  86.342  1.00 50.51           N  
ANISOU  870  N   ILE C  16     9228   3791   6171    576    203   -372       N  
ATOM    871  CA  ILE C  16      12.703  83.825  86.888  1.00 48.15           C  
ANISOU  871  CA  ILE C  16     8719   3753   5824    812    160   -217       C  
ATOM    872  C   ILE C  16      13.469  84.410  85.714  1.00 48.46           C  
ANISOU  872  C   ILE C  16     8899   3878   5636    681    204   -386       C  
ATOM    873  O   ILE C  16      13.888  83.665  84.841  1.00 51.08           O  
ANISOU  873  O   ILE C  16     9440   4026   5944    604    469   -581       O  
ATOM    874  CB  ILE C  16      13.660  83.049  87.800  1.00 57.78           C  
ANISOU  874  CB  ILE C  16     9819   4855   7280   1163    419    -67       C  
ATOM    875  CG1 ILE C  16      12.930  82.653  89.056  1.00 53.63           C  
ANISOU  875  CG1 ILE C  16     9185   4286   6905   1276    361    155       C  
ATOM    876  CG2 ILE C  16      14.826  83.901  88.194  1.00 57.77           C  
ANISOU  876  CG2 ILE C  16     9601   5087   7262   1401    388     32       C  
ATOM    877  CD1 ILE C  16      13.664  81.431  89.854  1.00 60.35           C  
ANISOU  877  CD1 ILE C  16    10061   4861   8008   1581    624    297       C  
ATOM    878  H   ILE C  16      11.880  82.070  86.436  1.00 60.61           H  
ATOM    879  HA  ILE C  16      12.277  84.538  87.389  1.00 57.78           H  
ATOM    880  HB  ILE C  16      13.976  82.255  87.342  1.00 69.34           H  
ATOM    881 HG12 ILE C  16      12.888  83.417  89.651  1.00 64.36           H  
ATOM    882 HG13 ILE C  16      12.034  82.363  88.823  1.00 64.36           H  
ATOM    883 HG21 ILE C  16      15.413  83.386  88.769  1.00 69.33           H  
ATOM    884 HG22 ILE C  16      15.302  84.173  87.394  1.00 69.33           H  
ATOM    885 HG23 ILE C  16      14.500  84.683  88.668  1.00 69.33           H  
ATOM    886 HD11 ILE C  16      13.150  81.221  90.650  1.00 72.42           H  
ATOM    887 HD12 ILE C  16      13.706  80.655  89.273  1.00 72.42           H  
ATOM    888 HD13 ILE C  16      14.559  81.709  90.101  1.00 72.42           H  
ATOM    889  N   ILE C  17      13.780  85.671  85.769  1.00 47.58           N  
ANISOU  889  N   ILE C  17     8669   4034   5375    680    -13   -307       N  
ATOM    890  CA  ILE C  17      14.642  86.280  84.774  1.00 60.44           C  
ANISOU  890  CA  ILE C  17    10420   5760   6785    545     69   -419       C  
ATOM    891  C   ILE C  17      15.694  87.150  85.458  1.00 51.35           C  
ANISOU  891  C   ILE C  17     8979   4836   5695    763     41   -253       C  
ATOM    892  O   ILE C  17      15.474  87.623  86.604  1.00 48.00           O  
ANISOU  892  O   ILE C  17     8306   4539   5394    966   -192    -59       O  
ATOM    893  CB  ILE C  17      13.826  87.141  83.820  1.00 57.04           C  
ANISOU  893  CB  ILE C  17    10236   5397   6040    199   -256   -513       C  
ATOM    894  CG1 ILE C  17      13.131  88.259  84.586  1.00 52.22           C  
ANISOU  894  CG1 ILE C  17     9429   4981   5432    240   -712   -349       C  
ATOM    895  CG2 ILE C  17      12.753  86.257  83.063  1.00 66.90           C  
ANISOU  895  CG2 ILE C  17    11777   6402   7239    -28   -269   -717       C  
ATOM    896  CD1 ILE C  17      12.496  89.326  83.601  1.00 65.68           C  
ANISOU  896  CD1 ILE C  17    11390   6746   6819    -79  -1113   -434       C  
ATOM    897  H   ILE C  17      13.507  86.214  86.378  1.00 57.10           H  
ATOM    898  HA  ILE C  17      15.092  85.589  84.263  1.00 72.53           H  
ATOM    899  HB  ILE C  17      14.424  87.535  83.166  1.00 68.45           H  
ATOM    900 HG12 ILE C  17      12.418  87.882  85.127  1.00 62.67           H  
ATOM    901 HG13 ILE C  17      13.777  88.711  85.150  1.00 62.67           H  
ATOM    902 HG21 ILE C  17      12.245  86.824  82.462  1.00 80.28           H  
ATOM    903 HG22 ILE C  17      13.211  85.567  82.559  1.00 80.28           H  
ATOM    904 HG23 ILE C  17      12.161  85.853  83.716  1.00 80.28           H  
ATOM    905 HD11 ILE C  17      12.064  90.020  84.124  1.00 78.81           H  
ATOM    906 HD12 ILE C  17      13.201  89.712  83.058  1.00 78.81           H  
ATOM    907 HD13 ILE C  17      11.845  88.884  83.035  1.00 78.81           H  
HETATM  908  N   SAR C  18      16.809  87.412  84.778  1.00 52.73           N  
ANISOU  908  N   SAR C  18     9175   5076   5783    709    268   -342       N  
HETATM  909  CA  SAR C  18      17.737  88.425  85.320  1.00 51.13           C  
ANISOU  909  CA  SAR C  18     8692   5100   5637    848    180   -200       C  
HETATM  910  C   SAR C  18      17.592  89.604  84.659  1.00 60.18           C  
ANISOU  910  C   SAR C  18     9972   6389   6505    566    -55   -188       C  
HETATM  911  O   SAR C  18      17.230  89.615  83.519  1.00 66.45           O  
ANISOU  911  O   SAR C  18    11103   7121   7022    250    -26   -326       O  
HETATM  912  CN  SAR C  18      17.202  86.729  83.534  1.00 55.06           C  
ANISOU  912  CN  SAR C  18     9743   5236   5941    518    624   -594       C  
HETATM  913  HN1 SAR C  18      18.003  86.182  83.699  1.00 66.07           H  
HETATM  914  HN2 SAR C  18      16.466  86.150  83.232  1.00 66.07           H  
HETATM  915  HN3 SAR C  18      17.398  87.395  82.845  1.00 66.07           H  
HETATM  916  HA2 SAR C  18      17.870  88.512  86.274  1.00 61.36           H  
HETATM  917  HA3 SAR C  18      18.556  88.032  84.930  1.00 61.36           H  
ATOM    918  N   LEU C  19      17.848  90.706  85.345  1.00 49.87           N  
ANISOU  918  N   LEU C  19     8437   5269   5242    661   -342    -19       N  
ATOM    919  CA  LEU C  19      17.851  92.055  84.769  1.00 51.15           C  
ANISOU  919  CA  LEU C  19     8721   5563   5151    388   -625     30       C  
ATOM    920  C   LEU C  19      19.233  92.606  85.025  1.00 59.63           C  
ANISOU  920  C   LEU C  19     9521   6776   6359    480   -472     93       C  
ATOM    921  O   LEU C  19      19.563  92.914  86.136  1.00 51.36           O  
ANISOU  921  O   LEU C  19     8142   5820   5553    774   -627    220       O  
ATOM    922  CB  LEU C  19      16.792  92.959  85.389  1.00 51.70           C  
ANISOU  922  CB  LEU C  19     8750   5706   5189    416  -1183    152       C  
ATOM    923  CG  LEU C  19      15.377  92.445  85.216  1.00 65.11           C  
ANISOU  923  CG  LEU C  19    10639   7280   6818    331  -1355     66       C  
ATOM    924  CD1 LEU C  19      14.452  93.329  85.949  1.00 86.56           C  
ANISOU  924  CD1 LEU C  19    13222  10099   9568    414  -1866    150       C  
ATOM    925  CD2 LEU C  19      15.054  92.445  83.725  1.00 75.67           C  
ANISOU  925  CD2 LEU C  19    12421   8505   7826    -62  -1341    -86       C  
ATOM    926  H   LEU C  19      18.033  90.704  86.185  1.00 59.84           H  
ATOM    927  HA  LEU C  19      17.703  92.007  83.811  1.00 61.38           H  
ATOM    928  HB2 LEU C  19      16.965  93.037  86.340  1.00 62.04           H  
ATOM    929  HB3 LEU C  19      16.843  93.833  84.972  1.00 62.04           H  
ATOM    930  HG  LEU C  19      15.301  91.542  85.562  1.00 78.13           H  
ATOM    931 HD11 LEU C  19      13.546  92.999  85.837  1.00103.87           H  
ATOM    932 HD12 LEU C  19      14.692  93.327  86.888  1.00103.87           H  
ATOM    933 HD13 LEU C  19      14.524  94.227  85.590  1.00103.87           H  
ATOM    934 HD21 LEU C  19      14.150  92.117  83.598  1.00 90.81           H  
ATOM    935 HD22 LEU C  19      15.130  93.350  83.386  1.00 90.81           H  
ATOM    936 HD23 LEU C  19      15.683  91.866  83.266  1.00 90.81           H  
ATOM    937  N   MET C  20      20.041  92.720  83.994  1.00 51.52           N  
ANISOU  937  N   MET C  20     8631   5771   5174    219   -159    -11       N  
ATOM    938  CA  MET C  20      21.452  93.000  84.142  1.00 61.23           C  
ANISOU  938  CA  MET C  20     9554   7120   6591    290    107    -12       C  
ATOM    939  C   MET C  20      21.682  94.491  83.994  1.00 65.14           C  
ANISOU  939  C   MET C  20    10057   7749   6944     53   -197    133       C  
ATOM    940  O   MET C  20      21.085  95.118  83.128  1.00 60.23           O  
ANISOU  940  O   MET C  20     9821   7101   5962   -307   -388    157       O  
ATOM    941  CB  MET C  20      22.253  92.254  83.087  1.00 64.70           C  
ANISOU  941  CB  MET C  20    10105   7523   6953    121    689   -241       C  
ATOM    942  CG  MET C  20      23.731  92.403  83.294  1.00 78.63           C  
ANISOU  942  CG  MET C  20    11468   9414   8993    227   1009   -293       C  
ATOM    943  SD  MET C  20      24.660  91.462  82.098  1.00 89.57           S  
ANISOU  943  SD  MET C  20    12931  10781  10321     65   1739   -625       S  
ATOM    944  CE  MET C  20      25.724  90.587  83.258  1.00 97.57           C  
ANISOU  944  CE  MET C  20    13342  11765  11966    638   1935   -718       C  
ATOM    945  H   MET C  20      19.790  92.636  83.176  1.00 61.83           H  
ATOM    946  HA  MET C  20      21.750  92.711  85.019  1.00 73.48           H  
ATOM    947  HB2 MET C  20      22.036  91.310  83.130  1.00 77.64           H  
ATOM    948  HB3 MET C  20      22.034  92.609  82.211  1.00 77.64           H  
ATOM    949  HG2 MET C  20      23.974  93.337  83.200  1.00 94.35           H  
ATOM    950  HG3 MET C  20      23.963  92.082  84.179  1.00 94.35           H  
ATOM    951  HE1 MET C  20      26.320  90.005  82.762  1.00117.08           H  
ATOM    952  HE2 MET C  20      26.239  91.235  83.764  1.00117.08           H  
ATOM    953  HE3 MET C  20      25.171  90.062  83.858  1.00117.08           H  
ATOM    954  N   VAL C  21      22.541  95.052  84.847  1.00 51.50           N  
ANISOU  954  N   VAL C  21     7922   6139   5507    260   -277    229       N  
ATOM    955  CA  VAL C  21      22.932  96.466  84.773  1.00 65.95           C  
ANISOU  955  CA  VAL C  21     9712   8075   7271     43   -550    365       C  
ATOM    956  C   VAL C  21      24.443  96.476  84.944  1.00 62.39           C  
ANISOU  956  C   VAL C  21     8853   7728   7124    115   -190    306       C  
ATOM    957  O   VAL C  21      24.944  96.493  86.083  1.00 60.72           O  
ANISOU  957  O   VAL C  21     8217   7568   7285    496   -323    350       O  
ATOM    958  CB  VAL C  21      22.247  97.332  85.861  1.00 64.48           C  
ANISOU  958  CB  VAL C  21     9397   7923   7182    262  -1179    539       C  
ATOM    959  CG1 VAL C  21      22.682  98.784  85.740  1.00 62.12           C  
ANISOU  959  CG1 VAL C  21     9078   7689   6835     27  -1481    667       C  
ATOM    960  CG2 VAL C  21      20.740  97.184  85.795  1.00 62.10           C  
ANISOU  960  CG2 VAL C  21     9404   7529   6663    244  -1503    545       C  
ATOM    961  H   VAL C  21      22.919  94.626  85.491  1.00 61.80           H  
ATOM    962  HA  VAL C  21      22.712  96.825  83.900  1.00 79.14           H  
ATOM    963  HB  VAL C  21      22.532  97.014  86.732  1.00 77.38           H  
ATOM    964 HG11 VAL C  21      22.240  99.303  86.430  1.00 74.54           H  
ATOM    965 HG12 VAL C  21      23.644  98.835  85.852  1.00 74.54           H  
ATOM    966 HG13 VAL C  21      22.432  99.116  84.864  1.00 74.54           H  
ATOM    967 HG21 VAL C  21      20.339  97.736  86.485  1.00 74.52           H  
ATOM    968 HG22 VAL C  21      20.433  97.472  84.921  1.00 74.52           H  
ATOM    969 HG23 VAL C  21      20.508  96.253  85.938  1.00 74.52           H  
TER     970      VAL C  21 
HETATM  971  N   ORN D   1      23.310 116.283  99.274  1.00 63.98           N  
ANISOU  971  N   ORN D   1     6415  11984   5911  -1545    391    305       N  
HETATM  972  CA  ORN D   1      22.496 115.151  98.781  1.00 72.60           C  
ANISOU  972  CA  ORN D   1     7917  12414   7256  -1024    613    338       C  
HETATM  973  C   ORN D   1      21.054 115.476  99.108  1.00 55.49           C  
ANISOU  973  C   ORN D   1     6142   9730   5213  -1270    496   -147       C  
HETATM  974  O   ORN D   1      20.756 116.396  99.890  1.00 60.86           O  
ANISOU  974  O   ORN D   1     6756  10585   5784  -1751    347   -446       O  
HETATM  975  CB  ORN D   1      22.847 113.817  99.518  1.00 64.81           C  
ANISOU  975  CB  ORN D   1     6663  11772   6189   -564    776    898       C  
HETATM  976  CG  ORN D   1      24.073 113.071  99.020  1.00 71.71           C  
ANISOU  976  CG  ORN D   1     7214  12905   7129    -73   1096   1546       C  
HETATM  977  CD  ORN D   1      23.879 112.205  97.717  1.00 67.06           C  
ANISOU  977  CD  ORN D   1     7179  11500   6799    439   1566   1573       C  
HETATM  978  NE  ORN D   1      22.933 111.102  97.906  1.00 66.66           N  
ANISOU  978  NE  ORN D   1     7550  10957   6822    742   1745   1543       N  
HETATM  979  HA  ORN D   1      22.615 115.110  97.694  1.00 87.13           H  
HETATM  980  HB2 ORN D   1      22.975 114.013 100.591  1.00 77.77           H  
HETATM  981  HB3 ORN D   1      21.997 113.137  99.363  1.00 77.77           H  
HETATM  982  HG2 ORN D   1      24.411 112.402  99.820  1.00 86.06           H  
HETATM  983  HG3 ORN D   1      24.867 113.803  98.833  1.00 86.06           H  
HETATM  984  HD2 ORN D   1      23.507 112.854  96.919  1.00 80.47           H  
HETATM  985  HD3 ORN D   1      24.848 111.778  97.441  1.00 80.47           H  
HETATM  986  HE1 ORN D   1      23.324 110.243  98.287  1.00 79.99           H  
HETATM  987  H1  ORN D   1      24.270 116.275  98.922  1.00 76.78           H  
HETATM  988  H2  ORN D   1      22.933 117.196  99.010  1.00 76.78           H  
HETATM  989  H3  ORN D   1      23.393 116.308 100.293  1.00 76.78           H  
ATOM    990  N   LEU D   2      20.145 114.648  98.524  1.00 51.86           N  
ANISOU  990  N   LEU D   2     6121   8601   4983   -949    619   -177       N  
ATOM    991  CA  LEU D   2      18.717 114.757  98.752  1.00 48.90           C  
ANISOU  991  CA  LEU D   2     6071   7697   4812  -1099    529   -482       C  
ATOM    992  C   LEU D   2      18.335 113.793  99.861  1.00 53.22           C  
ANISOU  992  C   LEU D   2     6557   8402   5263   -872    576   -312       C  
ATOM    993  O   LEU D   2      18.850 112.689  99.918  1.00 54.68           O  
ANISOU  993  O   LEU D   2     6668   8758   5349   -453    739     61       O  
ATOM    994  CB  LEU D   2      17.912 114.424  97.515  1.00 46.55           C  
ANISOU  994  CB  LEU D   2     6268   6650   4771  -1009    554   -540       C  
ATOM    995  CG  LEU D   2      18.216 115.356  96.332  1.00 46.49           C  
ANISOU  995  CG  LEU D   2     6358   6447   4859  -1260    491   -685       C  
ATOM    996  CD1 LEU D   2      17.468 114.728  95.113  1.00 52.20           C  
ANISOU  996  CD1 LEU D   2     7643   6477   5715  -1221    504   -632       C  
ATOM    997  CD2 LEU D   2      17.884 116.778  96.610  1.00 58.71           C  
ANISOU  997  CD2 LEU D   2     7734   8013   6559  -1706    341   -989       C  
ATOM    998  H   LEU D   2      20.358 113.997  98.005  1.00 62.24           H  
ATOM    999  HA  LEU D   2      18.498 115.659  99.034  1.00 58.68           H  
ATOM   1000  HB2 LEU D   2      18.116 113.517  97.241  1.00 55.87           H  
ATOM   1001  HB3 LEU D   2      16.968 114.504  97.722  1.00 55.87           H  
ATOM   1002  HG  LEU D   2      19.167 115.312  96.143  1.00 55.79           H  
ATOM   1003 HD11 LEU D   2      17.625 115.278  94.329  1.00 62.64           H  
ATOM   1004 HD12 LEU D   2      17.807 113.832  94.962  1.00 62.64           H  
ATOM   1005 HD13 LEU D   2      16.519 114.694  95.309  1.00 62.64           H  
ATOM   1006 HD21 LEU D   2      18.098 117.310  95.828  1.00 70.45           H  
ATOM   1007 HD22 LEU D   2      16.937 116.847  96.808  1.00 70.45           H  
ATOM   1008 HD23 LEU D   2      18.404 117.081  97.370  1.00 70.45           H  
ATOM   1009  N   VAL D   3      17.434 114.217 100.737  1.00 46.70           N  
ANISOU 1009  N   VAL D   3     5308   7075   5359   -544    778   -907       N  
ATOM   1010  CA  VAL D   3      16.961 113.280 101.721  1.00 44.04           C  
ANISOU 1010  CA  VAL D   3     5068   6816   4848   -410    780   -789       C  
ATOM   1011  C   VAL D   3      15.473 113.230 101.475  1.00 48.48           C  
ANISOU 1011  C   VAL D   3     5882   6845   5693   -285   1004   -909       C  
ATOM   1012  O   VAL D   3      14.784 114.258 101.556  1.00 46.29           O  
ANISOU 1012  O   VAL D   3     5746   6277   5563   -499   1174  -1203       O  
ATOM   1013  CB  VAL D   3      17.273 113.714 103.122  1.00 51.32           C  
ANISOU 1013  CB  VAL D   3     6049   8099   5350   -801    715   -895       C  
ATOM   1014  CG1 VAL D   3      16.651 112.734 104.081  1.00 66.67           C  
ANISOU 1014  CG1 VAL D   3     8123  10113   7097   -718    722   -751       C  
ATOM   1015  CG2 VAL D   3      18.791 113.824 103.324  1.00 50.76           C  
ANISOU 1015  CG2 VAL D   3     5682   8577   5028   -980    431   -705       C  
ATOM   1016  H   VAL D   3      16.999 114.959 100.722  1.00 56.04           H  
ATOM   1017  HA  VAL D   3      17.343 112.403 101.563  1.00 52.84           H  
ATOM   1018  HB  VAL D   3      16.880 114.587 103.281  1.00 61.58           H  
ATOM   1019 HG11 VAL D   3      16.851 113.012 104.988  1.00 80.01           H  
ATOM   1020 HG12 VAL D   3      15.691 112.722 103.941  1.00 80.01           H  
ATOM   1021 HG13 VAL D   3      17.021 111.853 103.915  1.00 80.01           H  
ATOM   1022 HG21 VAL D   3      18.968 114.106 104.235  1.00 60.91           H  
ATOM   1023 HG22 VAL D   3      19.194 112.957 103.160  1.00 60.91           H  
ATOM   1024 HG23 VAL D   3      19.145 114.477 102.701  1.00 60.91           H  
ATOM   1025  N   PHE D   4      14.959 112.041 101.179  1.00 40.86           N  
ANISOU 1025  N   PHE D   4     4960   5721   4845     60    997   -669       N  
ATOM   1026  CA  PHE D   4      13.544 111.807 101.084  1.00 42.16           C  
ANISOU 1026  CA  PHE D   4     5327   5449   5243    162   1164   -689       C  
ATOM   1027  C   PHE D   4      13.039 111.191 102.388  1.00 49.30           C  
ANISOU 1027  C   PHE D   4     6330   6531   5870    113   1198   -628       C  
ATOM   1028  O   PHE D   4      13.793 110.649 103.193  1.00 48.60           O  
ANISOU 1028  O   PHE D   4     6170   6864   5432     63   1022   -470       O  
ATOM   1029  CB  PHE D   4      13.240 110.850  99.915  1.00 49.57           C  
ANISOU 1029  CB  PHE D   4     6307   6086   6440    498   1106   -442       C  
ATOM   1030  CG  PHE D   4      13.635 111.380  98.585  1.00 50.08           C  
ANISOU 1030  CG  PHE D   4     6316   5992   6718    483   1092   -488       C  
ATOM   1031  CD1 PHE D   4      14.894 111.149  98.094  1.00 53.39           C  
ANISOU 1031  CD1 PHE D   4     6550   6718   7018    569    995   -419       C  
ATOM   1032  CD2 PHE D   4      12.748 112.109  97.830  1.00 52.40           C  
ANISOU 1032  CD2 PHE D   4     6717   5847   7344    356   1171   -570       C  
ATOM   1033  CE1 PHE D   4      15.269 111.665  96.875  1.00 55.06           C  
ANISOU 1033  CE1 PHE D   4     6716   6844   7362    485   1009   -469       C  
ATOM   1034  CE2 PHE D   4      13.127 112.607  96.615  1.00 47.71           C  
ANISOU 1034  CE2 PHE D   4     6093   5142   6893    255   1118   -572       C  
ATOM   1035  CZ  PHE D   4      14.384 112.389  96.167  1.00 45.13           C  
ANISOU 1035  CZ  PHE D   4     5613   5168   6367    300   1053   -539       C  
ATOM   1036  HA  PHE D   4      13.080 112.646 100.933  1.00 50.59           H  
ATOM   1037  HB2 PHE D   4      13.721 110.020 100.057  1.00 59.48           H  
ATOM   1038  HB3 PHE D   4      12.286 110.677  99.893  1.00 59.48           H  
ATOM   1039  HD1 PHE D   4      15.506 110.665  98.599  1.00 64.07           H  
ATOM   1040  HD2 PHE D   4      11.891 112.273  98.152  1.00 62.87           H  
ATOM   1041  HE1 PHE D   4      16.124 111.513  96.543  1.00 66.08           H  
ATOM   1042  HE2 PHE D   4      12.529 113.107  96.107  1.00 57.25           H  
ATOM   1043  HZ  PHE D   4      14.631 112.719  95.334  1.00 54.16           H  
ATOM   1044  N   PHE D   5      11.749 111.297 102.604  1.00 42.19           N  
ANISOU 1044  N   PHE D   5     5572   5325   5135     90   1415   -725       N  
ATOM   1045  CA  PHE D   5      11.175 110.784 103.822  1.00 44.20           C  
ANISOU 1045  CA  PHE D   5     5925   5772   5098    -21   1499   -688       C  
ATOM   1046  C   PHE D   5      10.112 109.773 103.540  1.00 53.72           C  
ANISOU 1046  C   PHE D   5     7211   6697   6501    209   1509   -415       C  
ATOM   1047  O   PHE D   5       9.332 109.916 102.589  1.00 47.32           O  
ANISOU 1047  O   PHE D   5     6418   5442   6120    350   1591   -397       O  
ATOM   1048  CB  PHE D   5      10.614 111.914 104.625  1.00 56.56           C  
ANISOU 1048  CB  PHE D   5     7569   7321   6601   -338   1827  -1112       C  
ATOM   1049  CG  PHE D   5      11.637 112.893 105.010  1.00 67.17           C  
ANISOU 1049  CG  PHE D   5     8899   8934   7690   -637   1789  -1382       C  
ATOM   1050  CD1 PHE D   5      12.408 112.677 106.134  1.00 72.04           C  
ANISOU 1050  CD1 PHE D   5     9553  10084   7734   -927   1652  -1345       C  
ATOM   1051  CD2 PHE D   5      11.857 114.003 104.234  1.00 73.59           C  
ANISOU 1051  CD2 PHE D   5     9666   9473   8821   -681   1832  -1615       C  
ATOM   1052  CE1 PHE D   5      13.381 113.570 106.493  1.00 76.40           C  
ANISOU 1052  CE1 PHE D   5    10106  10903   8020  -1264   1570  -1555       C  
ATOM   1053  CE2 PHE D   5      12.835 114.913 104.575  1.00 74.10           C  
ANISOU 1053  CE2 PHE D   5     9735   9785   8636  -1001   1757  -1838       C  
ATOM   1054  CZ  PHE D   5      13.603 114.692 105.710  1.00 67.36           C  
ANISOU 1054  CZ  PHE D   5     8926   9475   7194  -1296   1629  -1812       C  
ATOM   1055  H   PHE D   5      11.186 111.660 102.064  1.00 50.63           H  
ATOM   1056  HA  PHE D   5      11.870 110.355 104.346  1.00 53.04           H  
ATOM   1057  HB2 PHE D   5       9.942 112.373 104.098  1.00 67.88           H  
ATOM   1058  HB3 PHE D   5      10.217 111.559 105.436  1.00 67.88           H  
ATOM   1059  HD1 PHE D   5      12.262 111.920 106.655  1.00 86.44           H  
ATOM   1060  HD2 PHE D   5      11.343 114.142 103.471  1.00 88.31           H  
ATOM   1061  HE1 PHE D   5      13.894 113.422 107.255  1.00 91.68           H  
ATOM   1062  HE2 PHE D   5      12.978 115.668 104.051  1.00 88.92           H  
ATOM   1063  HZ  PHE D   5      14.259 115.305 105.953  1.00 80.84           H  
ATOM   1064  N   ALA D   6      10.099 108.761 104.384  1.00 43.93           N  
ANISOU 1064  N   ALA D   6     6027   5729   4936    193   1381   -163       N  
ATOM   1065  CA  ALA D   6       9.103 107.729 104.272  1.00 46.84           C  
ANISOU 1065  CA  ALA D   6     6495   5875   5427    348   1350    135       C  
ATOM   1066  C   ALA D   6       8.721 107.238 105.632  1.00 46.76           C  
ANISOU 1066  C   ALA D   6     6558   6211   4996    100   1378    235       C  
ATOM   1067  O   ALA D   6       9.524 107.226 106.576  1.00 50.02           O  
ANISOU 1067  O   ALA D   6     6961   7076   4966   -132   1255    239       O  
ATOM   1068  CB  ALA D   6       9.607 106.511 103.481  1.00 52.67           C  
ANISOU 1068  CB  ALA D   6     7264   6478   6271    683   1014    514       C  
ATOM   1069  H   ALA D   6      10.657 108.651 105.030  1.00 52.72           H  
ATOM   1070  HA  ALA D   6       8.313 108.082 103.834  1.00 56.21           H  
ATOM   1071  HB1 ALA D   6       8.899 105.849 103.436  1.00 63.21           H  
ATOM   1072  HB2 ALA D   6       9.851 106.795 102.587  1.00 63.21           H  
ATOM   1073  HB3 ALA D   6      10.380 106.139 103.934  1.00 63.21           H  
ATOM   1074  N   GLU D   7       7.520 106.707 105.689  1.00 45.61           N  
ANISOU 1074  N   GLU D   7     6485   5873   4972    120   1483    395       N  
ATOM   1075  CA  GLU D   7       7.104 105.989 106.862  1.00 48.73           C  
ANISOU 1075  CA  GLU D   7     6961   6598   4956   -122   1459    598       C  
ATOM   1076  C   GLU D   7       7.471 104.526 106.679  1.00 60.13           C  
ANISOU 1076  C   GLU D   7     8484   8014   6347     75    993   1126       C  
ATOM   1077  O   GLU D   7       7.041 103.885 105.727  1.00 57.14           O  
ANISOU 1077  O   GLU D   7     8170   7220   6321    356    868   1350       O  
ATOM   1078  CB  GLU D   7       5.611 106.189 107.126  1.00 70.21           C  
ANISOU 1078  CB  GLU D   7     9675   9183   7820   -244   1840    509       C  
ATOM   1079  CG  GLU D   7       5.292 106.338 108.584  1.00 89.27           C  
ANISOU 1079  CG  GLU D   7    12132  12076   9710   -675   2096    358       C  
ATOM   1080  CD  GLU D   7       3.811 106.525 108.815  1.00 96.89           C  
ANISOU 1080  CD  GLU D   7    13020  12926  10867   -763   2538    261       C  
ATOM   1081  OE1 GLU D   7       3.060 106.418 107.811  1.00 95.53           O  
ANISOU 1081  OE1 GLU D   7    12752  12286  11259   -481   2540    415       O  
ATOM   1082  OE2 GLU D   7       3.420 106.757 109.987  1.00 94.21           O1-
ANISOU 1082  OE2 GLU D   7    12709  12980  10106  -1138   2876     49       O1-
ATOM   1083  H   GLU D   7       6.930 106.750 105.065  1.00 54.73           H  
ATOM   1084  HA  GLU D   7       7.591 106.326 107.629  1.00 58.48           H  
ATOM   1085  HB2 GLU D   7       5.314 106.993 106.671  1.00 84.25           H  
ATOM   1086  HB3 GLU D   7       5.125 105.419 106.790  1.00 84.25           H  
ATOM   1087  HG2 GLU D   7       5.574 105.540 109.056  1.00107.12           H  
ATOM   1088  HG3 GLU D   7       5.754 107.116 108.934  1.00107.12           H  
ATOM   1089  N   ASP D   8       8.282 104.010 107.581  1.00 53.94           N  
ANISOU 1089  N   ASP D   8     7709   7645   5140    -95    712   1335       N  
ATOM   1090  CA  ASP D   8       8.854 102.682 107.438  1.00 63.65           C  
ANISOU 1090  CA  ASP D   8     8976   8816   6394    130    227   1833       C  
ATOM   1091  C   ASP D   8       7.957 101.740 108.228  1.00 61.62           C  
ANISOU 1091  C   ASP D   8     8867   8651   5895   -100    107   2202       C  
ATOM   1092  O   ASP D   8       7.938 101.809 109.450  1.00 71.09           O  
ANISOU 1092  O   ASP D   8    10087  10322   6601   -537    113   2242       O  
ATOM   1093  CB  ASP D   8      10.287 102.632 107.964  1.00 68.70           C  
ANISOU 1093  CB  ASP D   8     9475   9838   6790     69    -85   1947       C  
ATOM   1094  CG  ASP D   8      10.952 101.272 107.707  1.00 80.27           C  
ANISOU 1094  CG  ASP D   8    10915  11147   8438    402   -580   2457       C  
ATOM   1095  OD1 ASP D   8      10.207 100.323 107.351  1.00 80.67           O  
ANISOU 1095  OD1 ASP D   8    11137  10835   8677    576   -691   2720       O  
ATOM   1096  OD2 ASP D   8      12.203 101.157 107.824  1.00 83.26           O1-
ANISOU 1096  OD2 ASP D   8    11091  11728   8817    498   -857   2596       O1-
ATOM   1097  H   ASP D   8       8.523 104.415 108.301  1.00 64.73           H  
ATOM   1098  HA  ASP D   8       8.849 102.417 106.505  1.00 76.39           H  
ATOM   1099  HB2 ASP D   8      10.813 103.315 107.518  1.00 82.44           H  
ATOM   1100  HB3 ASP D   8      10.280 102.789 108.921  1.00 82.44           H  
ATOM   1101  N   CYS D   9       7.172 100.934 107.524  1.00110.46           N  
ANISOU 1101  N   CYS D   9    10345  19873  11750  -1498  -1729   2543       N  
ATOM   1102  CA  CYS D   9       6.222 100.020 108.132  1.00111.78           C  
ANISOU 1102  CA  CYS D   9    11107  18119  13244   -558  -1274   3339       C  
ATOM   1103  C   CYS D   9       6.723  98.578 108.116  1.00115.86           C  
ANISOU 1103  C   CYS D   9    12135  19028  12860    918  -1492   2919       C  
ATOM   1104  O   CYS D   9       5.925  97.647 108.234  1.00117.78           O  
ANISOU 1104  O   CYS D   9    12856  17583  14311   1544  -1436   3592       O  
ATOM   1105  CB  CYS D   9       4.889 100.148 107.396  1.00109.92           C  
ANISOU 1105  CB  CYS D   9    10860  15727  15177  -1658  -1659   4323       C  
ATOM   1106  SG  CYS D   9       4.457 101.878 107.001  1.00112.53           S  
ANISOU 1106  SG  CYS D   9    10539  15882  16334  -3629  -1767   4620       S  
ATOM   1107  H   CYS D   9       7.175 100.899 106.665  1.00132.55           H  
ATOM   1108  HA  CYS D   9       6.081 100.279 109.056  1.00134.13           H  
ATOM   1109  HB2 CYS D   9       4.940  99.654 106.563  1.00131.90           H  
ATOM   1110  HB3 CYS D   9       4.184  99.783 107.955  1.00131.90           H  
ATOM   1111  HG  CYS D   9       5.313 102.343 106.300  1.00135.03           H  
ATOM   1112  N   GLY D  10       8.034  98.372 107.952  1.00121.16           N  
ANISOU 1112  N   GLY D  10    12680  21875  11480   1477  -1777   1829       N  
ATOM   1113  CA  GLY D  10       8.561  97.017 107.922  1.00122.00           C  
ANISOU 1113  CA  GLY D  10    13281  22439  10636   2921  -2039   1353       C  
ATOM   1114  C   GLY D  10       8.313  96.282 109.222  1.00143.23           C  
ANISOU 1114  C   GLY D  10    16553  24305  13562   4397  -1201   1711       C  
ATOM   1115  O   GLY D  10       7.992  95.090 109.222  1.00148.39           O  
ANISOU 1115  O   GLY D  10    17765  23974  14644   5360  -1353   1975       O  
ATOM   1116  H   GLY D  10       8.624  98.991 107.859  1.00145.39           H  
ATOM   1117  HA2 GLY D  10       8.140  96.522 107.202  1.00146.40           H  
ATOM   1118  HA3 GLY D  10       9.517  97.045 107.761  1.00146.40           H  
ATOM   1119  N   SER D  11       8.467  96.984 110.345  1.00149.83           N  
ANISOU 1119  N   SER D  11    17303  25521  14104   4631   -338   1726       N  
ATOM   1120  CA  SER D  11       8.029  96.530 111.654  1.00149.59           C  
ANISOU 1120  CA  SER D  11    17839  24470  14529   5877    627   2289       C  
ATOM   1121  C   SER D  11       6.535  96.810 111.829  1.00145.56           C  
ANISOU 1121  C   SER D  11    17393  21560  16352   5206   1108   3644       C  
ATOM   1122  O   SER D  11       5.899  97.475 111.001  1.00126.08           O  
ANISOU 1122  O   SER D  11    14505  18331  15068   3736    672   4048       O  
ATOM   1123  CB  SER D  11       8.831  97.242 112.744  1.00148.84           C  
ANISOU 1123  CB  SER D  11    17659  25821  13074   6430   1269   1681       C  
ATOM   1124  OG  SER D  11       9.219  98.538 112.286  1.00143.15           O  
ANISOU 1124  OG  SER D  11    16206  26180  12006   5038    938   1249       O  
ATOM   1125  H   SER D  11       8.839  97.759 110.368  1.00179.80           H  
ATOM   1126  HA  SER D  11       8.177  95.575 111.734  1.00179.51           H  
ATOM   1127  HB2 SER D  11       8.281  97.335 113.537  1.00178.61           H  
ATOM   1128  HB3 SER D  11       9.626  96.724 112.945  1.00178.61           H  
ATOM   1129  HG  SER D  11       8.537  98.994 112.104  1.00171.78           H  
ATOM   1130  N   ASN D  12       5.968  96.297 112.930  1.00150.09           N  
ANISOU 1130  N   ASN D  12    18495  20933  17598   6332   2043   4379       N  
ATOM   1131  CA  ASN D  12       4.602  96.675 113.293  1.00152.43           C  
ANISOU 1131  CA  ASN D  12    18777  19102  20038   5811   2720   5693       C  
ATOM   1132  C   ASN D  12       4.511  98.173 113.556  1.00148.13           C  
ANISOU 1132  C   ASN D  12    17765  18940  19577   4779   3056   5672       C  
ATOM   1133  O   ASN D  12       3.683  98.869 112.957  1.00139.49           O  
ANISOU 1133  O   ASN D  12    16258  16764  19978   3394   2826   6263       O  
ATOM   1134  CB  ASN D  12       4.131  95.887 114.514  1.00147.50           C  
ANISOU 1134  CB  ASN D  12    18798  17355  19890   7340   3806   6481       C  
ATOM   1135  CG  ASN D  12       3.819  94.437 114.184  1.00164.28           C  
ANISOU 1135  CG  ASN D  12    21320  18478  22622   7856   3403   6704       C  
ATOM   1136  ND2 ASN D  12       3.874  93.568 115.196  1.00165.23           N  
ANISOU 1136  ND2 ASN D  12    21969  18606  22205   8659   3986   6494       N  
ATOM   1137  OD1 ASN D  12       3.519  94.103 113.035  1.00165.00           O  
ANISOU 1137  OD1 ASN D  12    21214  17923  23556   7119   2429   6800       O  
ATOM   1138  H   ASN D  12       6.345  95.742 113.468  1.00180.11           H  
ATOM   1139  HA  ASN D  12       4.010  96.464 112.554  1.00182.92           H  
ATOM   1140  HB2 ASN D  12       4.828  95.899 115.188  1.00177.00           H  
ATOM   1141  HB3 ASN D  12       3.324  96.296 114.863  1.00177.00           H  
ATOM   1142 HD21 ASN D  12       3.705  92.736 115.058  1.00198.28           H  
ATOM   1143 HD22 ASN D  12       4.078  93.840 115.986  1.00198.28           H  
ATOM   1144  N   LYS D  13       5.372  98.688 114.440  1.00145.57           N  
ANISOU 1144  N   LYS D  13    17514  20131  17663   5452   3514   4955       N  
ATOM   1145  CA  LYS D  13       5.461 100.128 114.653  1.00131.26           C  
ANISOU 1145  CA  LYS D  13    15260  18896  15717   4502   3643   4742       C  
ATOM   1146  C   LYS D  13       5.898 100.827 113.372  1.00118.38           C  
ANISOU 1146  C   LYS D  13    12926  18246  13806   2882   2569   4136       C  
ATOM   1147  O   LYS D  13       6.873 100.433 112.723  1.00125.61           O  
ANISOU 1147  O   LYS D  13    13691  20664  13372   2954   1854   3244       O  
ATOM   1148  CB  LYS D  13       6.436 100.445 115.797  1.00123.75           C  
ANISOU 1148  CB  LYS D  13    14556  19488  12975   5651   4131   3931       C  
ATOM   1149  CG  LYS D  13       7.930 100.384 115.454  1.00131.43           C  
ANISOU 1149  CG  LYS D  13    15271  22803  11863   5840   3382   2535       C  
ATOM   1150  CD  LYS D  13       8.577 101.773 115.292  1.00133.00           C  
ANISOU 1150  CD  LYS D  13    14800  24364  11370   4709   2966   1817       C  
ATOM   1151  CE  LYS D  13      10.103 101.674 115.103  1.00138.96           C  
ANISOU 1151  CE  LYS D  13    15245  27479  10074   5072   2345    473       C  
ATOM   1152  NZ  LYS D  13      10.807 102.905 115.582  1.00141.21           N1+
ANISOU 1152  NZ  LYS D  13    15138  28470  10047   4473   2025   -175       N1+
ATOM   1153  H   LYS D  13       5.910  98.225 114.925  1.00174.68           H  
ATOM   1154  HA  LYS D  13       4.586 100.467 114.899  1.00157.51           H  
ATOM   1155  HB2 LYS D  13       6.250 101.343 116.115  1.00148.50           H  
ATOM   1156  HB3 LYS D  13       6.279  99.812 116.515  1.00148.50           H  
ATOM   1157  HG2 LYS D  13       8.397  99.919 116.165  1.00157.71           H  
ATOM   1158  HG3 LYS D  13       8.040  99.905 114.618  1.00157.71           H  
ATOM   1159  HD2 LYS D  13       8.203 102.211 114.511  1.00159.60           H  
ATOM   1160  HD3 LYS D  13       8.404 102.301 116.087  1.00159.60           H  
ATOM   1161  HE2 LYS D  13      10.439 100.917 115.609  1.00166.75           H  
ATOM   1162  HE3 LYS D  13      10.301 101.559 114.160  1.00166.75           H  
ATOM   1163  HZ1 LYS D  13      11.684 102.820 115.461  1.00169.46           H  
ATOM   1164  HZ2 LYS D  13      10.519 103.615 115.128  1.00169.46           H  
ATOM   1165  HZ3 LYS D  13      10.645 103.030 116.448  1.00169.46           H  
ATOM   1166  N   CYS D  14       5.160 101.852 112.989  1.00112.84           N  
ANISOU 1166  N   CYS D  14    11806  16679  14389   1449   2472   4658       N  
ATOM   1167  CA  CYS D  14       5.653 102.716 111.940  1.00122.52           C  
ANISOU 1167  CA  CYS D  14    12380  18988  15185    -65   1576   4079       C  
ATOM   1168  C   CYS D  14       6.570 103.757 112.552  1.00123.95           C  
ANISOU 1168  C   CYS D  14    12265  20812  14019   -140   1693   3280       C  
ATOM   1169  O   CYS D  14       6.503 104.055 113.753  1.00120.72           O  
ANISOU 1169  O   CYS D  14    12159  20253  13458    705   2458   3363       O  
ATOM   1170  CB  CYS D  14       4.517 103.383 111.187  1.00106.20           C  
ANISOU 1170  CB  CYS D  14     9994  15322  15035  -1626   1289   4926       C  
ATOM   1171  SG  CYS D  14       3.631 102.199 110.215  1.00109.95           S  
ANISOU 1171  SG  CYS D  14    10706  14099  16971  -1712    771   5640       S  
ATOM   1172  H   CYS D  14       4.392 102.064 113.311  1.00135.41           H  
ATOM   1173  HA  CYS D  14       6.169 102.190 111.308  1.00147.03           H  
ATOM   1174  HB2 CYS D  14       3.900 103.783 111.820  1.00127.44           H  
ATOM   1175  HB3 CYS D  14       4.877 104.060 110.592  1.00127.44           H  
ATOM   1176  HG  CYS D  14       4.385 101.698 109.427  1.00131.94           H  
ATOM   1177  N   ALA D  15       7.473 104.250 111.721  1.00 57.58           N  
ANISOU 1177  N   ALA D  15     8192   7396   6291   1073   1327    336       N  
ATOM   1178  CA  ALA D  15       8.353 105.349 112.062  1.00 60.34           C  
ANISOU 1178  CA  ALA D  15     8365   8235   6327    645   1306    152       C  
ATOM   1179  C   ALA D  15       8.788 106.098 110.797  1.00 59.58           C  
ANISOU 1179  C   ALA D  15     8266   7993   6378    532   1211     58       C  
ATOM   1180  O   ALA D  15       9.027 105.478 109.762  1.00 56.27           O  
ANISOU 1180  O   ALA D  15     7895   7424   6061    838   1139    251       O  
ATOM   1181  CB  ALA D  15       9.597 104.839 112.777  1.00 78.94           C  
ANISOU 1181  CB  ALA D  15    10399  11454   8142    678   1221    445       C  
ATOM   1182  H   ALA D  15       7.598 103.952 110.924  1.00 69.10           H  
ATOM   1183  HA  ALA D  15       7.890 105.969 112.647  1.00 72.41           H  
ATOM   1184  HB1 ALA D  15      10.167 105.593 112.994  1.00 94.73           H  
ATOM   1185  HB2 ALA D  15       9.329 104.382 113.590  1.00 94.73           H  
ATOM   1186  HB3 ALA D  15      10.068 104.225 112.192  1.00 94.73           H  
ATOM   1187  N   ILE D  16       8.932 107.421 110.893  1.00 51.91           N  
ANISOU 1187  N   ILE D  16     7288   7054   5382     65   1258   -243       N  
ATOM   1188  CA  ILE D  16       9.426 108.201 109.766  1.00 56.70           C  
ANISOU 1188  CA  ILE D  16     7863   7584   6098    -71   1165   -332       C  
ATOM   1189  C   ILE D  16      10.917 107.989 109.659  1.00 63.80           C  
ANISOU 1189  C   ILE D  16     8478   9217   6545    -34   1025   -124       C  
ATOM   1190  O   ILE D  16      11.636 108.159 110.629  1.00 59.54           O  
ANISOU 1190  O   ILE D  16     7737   9322   5562   -295    996    -78       O  
ATOM   1191  CB  ILE D  16       9.141 109.698 109.946  1.00 63.34           C  
ANISOU 1191  CB  ILE D  16     8790   8209   7068   -580   1331   -700       C  
ATOM   1192  CG1 ILE D  16       7.641 110.024 109.973  1.00 72.58           C  
ANISOU 1192  CG1 ILE D  16    10162   8580   8835   -583   1563   -789       C  
ATOM   1193  CG2 ILE D  16       9.824 110.468 108.784  1.00 57.66           C  
ANISOU 1193  CG2 ILE D  16     7993   7511   6404   -712   1205   -762       C  
ATOM   1194  CD1 ILE D  16       6.929 109.684 108.665  1.00 91.68           C  
ANISOU 1194  CD1 ILE D  16    12618  10444  11770   -319   1389   -559       C  
ATOM   1195  H   ILE D  16       8.751 107.884 111.594  1.00 62.30           H  
ATOM   1196  HA  ILE D  16       9.006 107.898 108.946  1.00 68.04           H  
ATOM   1197  HB  ILE D  16       9.535 109.988 110.783  1.00 76.01           H  
ATOM   1198 HG12 ILE D  16       7.221 109.515 110.684  1.00 87.10           H  
ATOM   1199 HG13 ILE D  16       7.528 110.974 110.137  1.00 87.10           H  
ATOM   1200 HG21 ILE D  16       9.650 111.417 108.889  1.00 69.19           H  
ATOM   1201 HG22 ILE D  16      10.779 110.302 108.815  1.00 69.19           H  
ATOM   1202 HG23 ILE D  16       9.461 110.156 107.941  1.00 69.19           H  
ATOM   1203 HD11 ILE D  16       5.990 109.914 108.748  1.00110.01           H  
ATOM   1204 HD12 ILE D  16       7.332 110.194 107.945  1.00110.01           H  
ATOM   1205 HD13 ILE D  16       7.024 108.735 108.492  1.00110.01           H  
ATOM   1206  N   ILE D  17      11.400 107.655 108.485  1.00 54.61           N  
ANISOU 1206  N   ILE D  17     7300   7968   5483    233    954     44       N  
ATOM   1207  CA  ILE D  17      12.830 107.650 108.292  1.00 51.98           C  
ANISOU 1207  CA  ILE D  17     6652   8276   4823    259    888    281       C  
ATOM   1208  C   ILE D  17      13.242 108.546 107.108  1.00 51.56           C  
ANISOU 1208  C   ILE D  17     6638   8056   4898     87    833    119       C  
ATOM   1209  O   ILE D  17      12.441 108.849 106.216  1.00 51.52           O  
ANISOU 1209  O   ILE D  17     6921   7403   5250     63    831    -72       O  
ATOM   1210  CB  ILE D  17      13.309 106.213 108.071  1.00 57.54           C  
ANISOU 1210  CB  ILE D  17     7268   9102   5491    835    994    753       C  
ATOM   1211  CG1 ILE D  17      12.642 105.656 106.801  1.00 56.50           C  
ANISOU 1211  CG1 ILE D  17     7570   8197   5699   1122   1098    713       C  
ATOM   1212  CG2 ILE D  17      12.973 105.326 109.240  1.00 67.41           C  
ANISOU 1212  CG2 ILE D  17     8436  10561   6616   1015   1043    957       C  
ATOM   1213  CD1 ILE D  17      13.278 104.371 106.321  1.00 60.82           C  
ANISOU 1213  CD1 ILE D  17     8158   8743   6207   1649   1355   1133       C  
ATOM   1214  H   ILE D  17      10.935 107.433 107.796  1.00 65.54           H  
ATOM   1215  HA  ILE D  17      13.260 107.991 109.092  1.00 62.38           H  
ATOM   1216  HB  ILE D  17      14.270 106.218 107.946  1.00 69.05           H  
ATOM   1217 HG12 ILE D  17      11.707 105.477 106.987  1.00 67.80           H  
ATOM   1218 HG13 ILE D  17      12.719 106.312 106.090  1.00 67.80           H  
ATOM   1219 HG21 ILE D  17      13.294 104.429 109.057  1.00 80.89           H  
ATOM   1220 HG22 ILE D  17      13.404 105.676 110.035  1.00 80.89           H  
ATOM   1221 HG23 ILE D  17      12.011 105.316 109.362  1.00 80.89           H  
ATOM   1222 HD11 ILE D  17      12.817 104.071 105.522  1.00 72.98           H  
ATOM   1223 HD12 ILE D  17      14.213 104.536 106.122  1.00 72.98           H  
ATOM   1224 HD13 ILE D  17      13.201 103.701 107.019  1.00 72.98           H  
HETATM 1225  N   SAR D  18      14.523 108.933 107.076  1.00 51.98           N  
ANISOU 1225  N   SAR D  18     6363   8729   4657    -47    765    271       N  
HETATM 1226  CA  SAR D  18      15.077 109.639 105.945  1.00 51.29           C  
ANISOU 1226  CA  SAR D  18     6278   8550   4661   -146    729    181       C  
HETATM 1227  C   SAR D  18      15.755 108.743 105.095  1.00 55.63           C  
ANISOU 1227  C   SAR D  18     6794   9093   5252    321    850    546       C  
HETATM 1228  O   SAR D  18      16.359 107.789 105.514  1.00 65.11           O  
ANISOU 1228  O   SAR D  18     7755  10668   6318    669    964    984       O  
HETATM 1229  CN  SAR D  18      15.494 108.739 108.154  1.00 58.59           C  
ANISOU 1229  CN  SAR D  18     6777  10431   5054   -168    687    597       C  
HETATM 1230  HN1 SAR D  18      15.743 109.613 108.532  1.00 70.31           H  
HETATM 1231  HN2 SAR D  18      16.297 108.296 107.797  1.00 70.31           H  
HETATM 1232  HN3 SAR D  18      15.098 108.182 108.853  1.00 70.31           H  
HETATM 1233  HA2 SAR D  18      14.561 110.317 105.486  1.00 61.55           H  
HETATM 1234  HA3 SAR D  18      15.799 110.089 106.447  1.00 61.55           H  
ATOM   1235  N   LEU D  19      15.719 109.007 103.799  1.00 48.10           N  
ANISOU 1235  N   LEU D  19     6098   7678   4500    347    887    420       N  
ATOM   1236  CA  LEU D  19      16.492 108.218 102.815  1.00 49.39           C  
ANISOU 1236  CA  LEU D  19     6336   7749   4681    757   1126    745       C  
ATOM   1237  C   LEU D  19      17.356 109.112 101.970  1.00 49.91           C  
ANISOU 1237  C   LEU D  19     6287   7953   4724    567   1093    687       C  
ATOM   1238  O   LEU D  19      16.831 109.911 101.191  1.00 51.19           O  
ANISOU 1238  O   LEU D  19     6725   7689   5037    269    966    336       O  
ATOM   1239  CB  LEU D  19      15.559 107.425 101.898  1.00 50.50           C  
ANISOU 1239  CB  LEU D  19     7085   7080   5021    944   1270    670       C  
ATOM   1240  CG  LEU D  19      14.701 106.412 102.680  1.00 64.28           C  
ANISOU 1240  CG  LEU D  19     8969   8654   6799   1170   1330    763       C  
ATOM   1241  CD1 LEU D  19      13.590 105.979 101.809  1.00 78.25           C  
ANISOU 1241  CD1 LEU D  19    11348   9645   8740   1107   1332    620       C  
ATOM   1242  CD2 LEU D  19      15.572 105.253 103.070  1.00 69.76           C  
ANISOU 1242  CD2 LEU D  19     9458   9675   7370   1682   1669   1247       C  
ATOM   1243  H   LEU D  19      15.255 109.641 103.449  1.00 57.72           H  
ATOM   1244  HA  LEU D  19      17.066 107.592 103.284  1.00 59.26           H  
ATOM   1245  HB2 LEU D  19      14.962 108.039 101.444  1.00 60.60           H  
ATOM   1246  HB3 LEU D  19      16.091 106.935 101.251  1.00 60.60           H  
ATOM   1247  HG  LEU D  19      14.340 106.825 103.480  1.00 77.13           H  
ATOM   1248 HD11 LEU D  19      13.042 105.340 102.292  1.00 93.90           H  
ATOM   1249 HD12 LEU D  19      13.059 106.754 101.567  1.00 93.90           H  
ATOM   1250 HD13 LEU D  19      13.956 105.566 101.012  1.00 93.90           H  
ATOM   1251 HD21 LEU D  19      15.039 104.610 103.563  1.00 83.71           H  
ATOM   1252 HD22 LEU D  19      15.928 104.841 102.266  1.00 83.71           H  
ATOM   1253 HD23 LEU D  19      16.298 105.576 103.625  1.00 83.71           H  
ATOM   1254  N   MET D  20      18.663 108.902 102.006  1.00 52.35           N  
ANISOU 1254  N   MET D  20     6185   8808   4896    774   1235   1106       N  
ATOM   1255  CA  MET D  20      19.618 109.846 101.449  1.00 53.46           C  
ANISOU 1255  CA  MET D  20     6083   9249   4980    551   1168   1102       C  
ATOM   1256  C   MET D  20      20.169 109.353 100.126  1.00 54.32           C  
ANISOU 1256  C   MET D  20     6446   8963   5229    906   1530   1290       C  
ATOM   1257  O   MET D  20      20.589 108.200 100.015  1.00 63.77           O  
ANISOU 1257  O   MET D  20     7661  10087   6482   1417   1938   1731       O  
ATOM   1258  CB  MET D  20      20.753 110.088 102.446  1.00 67.99           C  
ANISOU 1258  CB  MET D  20     7220  12054   6558    425   1039   1520       C  
ATOM   1259  CG  MET D  20      21.786 111.078 101.940  1.00 81.29           C  
ANISOU 1259  CG  MET D  20     8606  14116   8164    149    941   1562       C  
ATOM   1260  SD  MET D  20      23.051 111.587 103.131  1.00 98.37           S  
ANISOU 1260  SD  MET D  20     9948  17496   9931   -266    647   2063       S  
ATOM   1261  CE  MET D  20      22.097 112.596 104.223  1.00 79.56           C  
ANISOU 1261  CE  MET D  20     7806  15177   7244  -1038    301   1411       C  
ATOM   1262  H   MET D  20      19.029 108.206 102.354  1.00 62.81           H  
ATOM   1263  HA  MET D  20      19.168 110.693 101.303  1.00 64.15           H  
ATOM   1264  HB2 MET D  20      20.380 110.440 103.269  1.00 81.58           H  
ATOM   1265  HB3 MET D  20      21.205 109.248 102.620  1.00 81.58           H  
ATOM   1266  HG2 MET D  20      22.245 110.680 101.184  1.00 97.55           H  
ATOM   1267  HG3 MET D  20      21.323 111.880 101.650  1.00 97.55           H  
ATOM   1268  HE1 MET D  20      22.676 112.938 104.923  1.00 95.47           H  
ATOM   1269  HE2 MET D  20      21.716 113.333 103.720  1.00 95.47           H  
ATOM   1270  HE3 MET D  20      21.390 112.059 104.611  1.00 95.47           H  
ATOM   1271  N   VAL D  21      20.124 110.227  99.129  1.00 53.49           N  
ANISOU 1271  N   VAL D  21     6586   8550   5187    620   1437    955       N  
ATOM   1272  CA  VAL D  21      20.720 110.039  97.808  1.00 61.78           C  
ANISOU 1272  CA  VAL D  21     7922   9240   6311    809   1765   1056       C  
ATOM   1273  C   VAL D  21      21.605 111.228  97.565  1.00 55.25           C  
ANISOU 1273  C   VAL D  21     6707   8852   5435    518   1588   1011       C  
ATOM   1274  O   VAL D  21      21.107 112.274  97.107  1.00 57.76           O  
ANISOU 1274  O   VAL D  21     7212   8946   5790     80   1308    562       O  
ATOM   1275  CB  VAL D  21      19.658 109.978  96.723  1.00 67.53           C  
ANISOU 1275  CB  VAL D  21     9414   9119   7124    622   1758    677       C  
ATOM   1276  CG1 VAL D  21      20.343 109.646  95.353  1.00 62.16           C  
ANISOU 1276  CG1 VAL D  21     9155   8031   6433    780   2194    794       C  
ATOM   1277  CG2 VAL D  21      18.523 108.993  97.149  1.00 75.91           C  
ANISOU 1277  CG2 VAL D  21    10843   9786   8214    744   1783    652       C  
ATOM   1278  H   VAL D  21      19.728 110.987  99.200  1.00 64.18           H  
ATOM   1279  HA  VAL D  21      21.252 109.229  97.786  1.00 74.13           H  
ATOM   1280  HB  VAL D  21      19.258 110.857  96.639  1.00 81.03           H  
ATOM   1281 HG11 VAL D  21      19.663 109.607  94.662  1.00 74.59           H  
ATOM   1282 HG12 VAL D  21      20.987 110.341  95.145  1.00 74.59           H  
ATOM   1283 HG13 VAL D  21      20.792 108.789  95.424  1.00 74.59           H  
ATOM   1284 HG21 VAL D  21      17.852 108.963  96.448  1.00 91.09           H  
ATOM   1285 HG22 VAL D  21      18.904 108.110  97.281  1.00 91.09           H  
ATOM   1286 HG23 VAL D  21      18.125 109.308  97.975  1.00 91.09           H  
TER    1287      VAL D  21 
HETATM 1288  N   ORN E   1       0.011 116.360  88.216  1.00 73.57           N  
ANISOU 1288  N   ORN E   1     9610  10043   8300   1987  -1853   -893       N  
HETATM 1289  CA  ORN E   1       1.306 115.766  88.498  1.00 71.69           C  
ANISOU 1289  CA  ORN E   1     9185  10149   7905   1378  -1248   -813       C  
HETATM 1290  C   ORN E   1       1.380 115.504  89.996  1.00 70.35           C  
ANISOU 1290  C   ORN E   1     8596  10080   8055   1686   -929  -1193       C  
HETATM 1291  O   ORN E   1       0.495 115.877  90.775  1.00 82.96           O  
ANISOU 1291  O   ORN E   1    10092  11495   9934   2275  -1134  -1524       O  
HETATM 1292  CB  ORN E   1       2.467 116.732  88.106  1.00 65.62           C  
ANISOU 1292  CB  ORN E   1     9127   8964   6841    707  -1430   -422       C  
HETATM 1293  CG  ORN E   1       2.810 116.777  86.612  1.00 77.26           C  
ANISOU 1293  CG  ORN E   1    11019  10505   7832     29  -1548    -24       C  
HETATM 1294  CD  ORN E   1       3.542 115.520  86.082  1.00 58.27           C  
ANISOU 1294  CD  ORN E   1     8071   8833   5237   -544   -865    -95       C  
HETATM 1295  NE  ORN E   1       4.834 115.387  86.637  1.00 56.09           N  
ANISOU 1295  NE  ORN E   1     7640   8683   4988  -1013   -431   -197       N  
HETATM 1296  HA  ORN E   1       1.338 114.806  87.975  1.00 86.03           H  
HETATM 1297  HB2 ORN E   1       3.377 116.419  88.638  1.00 78.74           H  
HETATM 1298  HB3 ORN E   1       2.183 117.749  88.413  1.00 78.74           H  
HETATM 1299  HG2 ORN E   1       1.881 116.909  86.045  1.00 92.71           H  
HETATM 1300  HG3 ORN E   1       3.452 117.647  86.432  1.00 92.71           H  
HETATM 1301  HD2 ORN E   1       2.953 114.635  86.339  1.00 69.93           H  
HETATM 1302  HD3 ORN E   1       3.643 115.611  84.996  1.00 69.93           H  
HETATM 1303  HE1 ORN E   1       5.578 115.915  86.185  1.00 67.31           H  
HETATM 1304  H1  ORN E   1      -0.765 115.877  88.677  1.00 88.28           H  
HETATM 1305  H2  ORN E   1      -0.061 117.335  88.516  1.00 88.28           H  
HETATM 1306  H3  ORN E   1      -0.225 116.364  87.221  1.00 88.28           H  
ATOM   1307  N   LEU E   2       2.491 114.815  90.390  1.00 64.89           N  
ANISOU 1307  N   LEU E   2     7637   9701   7316   1222   -426  -1186       N  
ATOM   1308  CA  LEU E   2       2.759 114.475  91.775  1.00 58.85           C  
ANISOU 1308  CA  LEU E   2     6546   9037   6779   1348   -143  -1467       C  
ATOM   1309  C   LEU E   2       3.878 115.374  92.247  1.00 63.57           C  
ANISOU 1309  C   LEU E   2     7574   9233   7345    996   -216  -1320       C  
ATOM   1310  O   LEU E   2       4.789 115.653  91.458  1.00 58.31           O  
ANISOU 1310  O   LEU E   2     7212   8489   6456    446   -214  -1040       O  
ATOM   1311  CB  LEU E   2       3.192 113.010  91.905  1.00 69.42           C  
ANISOU 1311  CB  LEU E   2     7279  10943   8153   1112    349  -1575       C  
ATOM   1312  CG  LEU E   2       2.153 111.942  91.496  1.00 68.36           C  
ANISOU 1312  CG  LEU E   2     6863  11042   8067   1253    399  -1582       C  
ATOM   1313  CD1 LEU E   2       2.722 110.530  91.598  1.00 60.10           C  
ANISOU 1313  CD1 LEU E   2     5870   9814   7152    745    524  -1315       C  
ATOM   1314  CD2 LEU E   2       0.903 112.073  92.290  1.00 61.01           C  
ANISOU 1314  CD2 LEU E   2     6034   9871   7275   1563    213  -1691       C  
ATOM   1315  H   LEU E   2       3.109 114.559  89.850  1.00 77.87           H  
ATOM   1316  HA  LEU E   2       1.971 114.629  92.319  1.00 70.62           H  
ATOM   1317  HB2 LEU E   2       3.976 112.875  91.350  1.00 83.30           H  
ATOM   1318  HB3 LEU E   2       3.424 112.844  92.832  1.00 83.30           H  
ATOM   1319  HG  LEU E   2       1.919 112.090  90.566  1.00 82.03           H  
ATOM   1320 HD11 LEU E   2       2.038 109.895  91.333  1.00 72.12           H  
ATOM   1321 HD12 LEU E   2       3.489 110.455  91.010  1.00 72.12           H  
ATOM   1322 HD13 LEU E   2       2.990 110.364  92.516  1.00 72.12           H  
ATOM   1323 HD21 LEU E   2       0.276 111.388  92.007  1.00 73.21           H  
ATOM   1324 HD22 LEU E   2       1.113 111.960  93.231  1.00 73.21           H  
ATOM   1325 HD23 LEU E   2       0.523 112.952  92.139  1.00 73.21           H  
ATOM   1326  N   VAL E   3       3.830 115.858  93.475  1.00 57.54           N  
ANISOU 1326  N   VAL E   3     9326   5265   7272   1802   -617    -41       N  
ATOM   1327  CA  VAL E   3       4.926 116.698  93.966  1.00 67.44           C  
ANISOU 1327  CA  VAL E   3    11082   6216   8326   1277   -513   -212       C  
ATOM   1328  C   VAL E   3       5.525 115.949  95.144  1.00 59.19           C  
ANISOU 1328  C   VAL E   3     9100   6052   7338   1109      1   -338       C  
ATOM   1329  O   VAL E   3       4.856 115.816  96.158  1.00 52.38           O  
ANISOU 1329  O   VAL E   3     7653   5663   6585   1671     17   -610       O  
ATOM   1330  CB  VAL E   3       4.491 118.064  94.397  1.00 67.15           C  
ANISOU 1330  CB  VAL E   3    11700   5507   8307   1749   -997   -584       C  
ATOM   1331  CG1 VAL E   3       5.716 118.866  94.822  1.00 69.95           C  
ANISOU 1331  CG1 VAL E   3    12594   5568   8417   1101   -841   -721       C  
ATOM   1332  CG2 VAL E   3       3.753 118.762  93.277  1.00 85.55           C  
ANISOU 1332  CG2 VAL E   3    14815   7040  10651   1949  -1642   -426       C  
ATOM   1333  H   VAL E   3       3.230 115.684  94.066  1.00 69.05           H  
ATOM   1334  HA  VAL E   3       5.603 116.790  93.278  1.00 80.93           H  
ATOM   1335  HB  VAL E   3       3.894 117.988  95.158  1.00 80.58           H  
ATOM   1336 HG11 VAL E   3       5.433 119.751  95.101  1.00 83.94           H  
ATOM   1337 HG12 VAL E   3       6.152 118.410  95.559  1.00 83.94           H  
ATOM   1338 HG13 VAL E   3       6.325 118.935  94.070  1.00 83.94           H  
ATOM   1339 HG21 VAL E   3       3.482 119.643  93.580  1.00102.66           H  
ATOM   1340 HG22 VAL E   3       4.344 118.843  92.512  1.00102.66           H  
ATOM   1341 HG23 VAL E   3       2.972 118.239  93.039  1.00102.66           H  
ATOM   1342  N   PHE E   4       6.762 115.476  95.026  1.00 49.42           N  
ANISOU 1342  N   PHE E   4     7723   5018   6036    309    383   -184       N  
ATOM   1343  CA  PHE E   4       7.469 114.816  96.130  1.00 50.46           C  
ANISOU 1343  CA  PHE E   4     7052   5862   6257     76    735   -272       C  
ATOM   1344  C   PHE E   4       8.309 115.855  96.822  1.00 56.20           C  
ANISOU 1344  C   PHE E   4     8264   6287   6803   -243    734   -560       C  
ATOM   1345  O   PHE E   4       8.598 116.928  96.278  1.00 53.35           O  
ANISOU 1345  O   PHE E   4     8844   5176   6252   -478    554   -637       O  
ATOM   1346  CB  PHE E   4       8.395 113.678  95.648  1.00 49.75           C  
ANISOU 1346  CB  PHE E   4     6418   6132   6352   -589   1087    -31       C  
ATOM   1347  CG  PHE E   4       7.672 112.526  95.109  1.00 47.80           C  
ANISOU 1347  CG  PHE E   4     5567   6280   6314   -324   1141    237       C  
ATOM   1348  CD1 PHE E   4       7.302 112.491  93.781  1.00 54.51           C  
ANISOU 1348  CD1 PHE E   4     6839   6753   7120   -404   1073    433       C  
ATOM   1349  CD2 PHE E   4       7.244 111.473  95.938  1.00 51.30           C  
ANISOU 1349  CD2 PHE E   4     5191   7398   6904    -22   1111    226       C  
ATOM   1350  CE1 PHE E   4       6.558 111.424  93.299  1.00 48.13           C  
ANISOU 1350  CE1 PHE E   4     5453   6331   6502   -121   1122    667       C  
ATOM   1351  CE2 PHE E   4       6.525 110.441  95.432  1.00 56.79           C  
ANISOU 1351  CE2 PHE E   4     5943   8010   7626     91    818    165       C  
ATOM   1352  CZ  PHE E   4       6.175 110.429  94.130  1.00 47.37           C  
ANISOU 1352  CZ  PHE E   4     4874   6692   6433    127    866    422       C  
ATOM   1353  H   PHE E   4       7.225 115.524  94.303  1.00 59.30           H  
ATOM   1354  HA  PHE E   4       6.829 114.455  96.763  1.00 60.55           H  
ATOM   1355  HB2 PHE E   4       8.973 114.020  94.948  1.00 59.70           H  
ATOM   1356  HB3 PHE E   4       8.930 113.370  96.396  1.00 59.70           H  
ATOM   1357  HD1 PHE E   4       7.549 113.183  93.210  1.00 65.41           H  
ATOM   1358  HD2 PHE E   4       7.465 111.480  96.842  1.00 61.56           H  
ATOM   1359  HE1 PHE E   4       6.321 111.394  92.401  1.00 57.75           H  
ATOM   1360  HE2 PHE E   4       6.259 109.745  95.988  1.00 68.15           H  
ATOM   1361  HZ  PHE E   4       5.696 109.708  93.791  1.00 56.85           H  
ATOM   1362  N   PHE E   5       8.707 115.550  98.038  1.00 49.06           N  
ANISOU 1362  N   PHE E   5     6767   5947   5927   -301    902   -706       N  
ATOM   1363  CA  PHE E   5       9.443 116.535  98.821  1.00 49.35           C  
ANISOU 1363  CA  PHE E   5     7211   5760   5780   -566    901  -1011       C  
ATOM   1364  C   PHE E   5      10.780 115.974  99.271  1.00 49.01           C  
ANISOU 1364  C   PHE E   5     6718   6079   5825  -1270   1159   -973       C  
ATOM   1365  O   PHE E   5      10.878 114.800  99.641  1.00 53.34           O  
ANISOU 1365  O   PHE E   5     6423   7254   6591  -1322   1257   -792       O  
ATOM   1366  CB  PHE E   5       8.639 116.980 100.041  1.00 59.96           C  
ANISOU 1366  CB  PHE E   5     8374   7378   7028     15    790  -1356       C  
ATOM   1367  CG  PHE E   5       7.431 117.741  99.672  1.00 63.29           C  
ANISOU 1367  CG  PHE E   5     9246   7323   7478    716    474  -1562       C  
ATOM   1368  CD1 PHE E   5       7.502 119.101  99.419  1.00 79.07           C  
ANISOU 1368  CD1 PHE E   5    12171   8481   9392    766    195  -1804       C  
ATOM   1369  CD2 PHE E   5       6.242 117.090  99.487  1.00 65.50           C  
ANISOU 1369  CD2 PHE E   5     9045   7922   7919   1310    398  -1514       C  
ATOM   1370  CE1 PHE E   5       6.383 119.808  99.043  1.00 86.59           C  
ANISOU 1370  CE1 PHE E   5    13530   8882  10488   1455   -230  -2015       C  
ATOM   1371  CE2 PHE E   5       5.124 117.788  99.117  1.00 69.83           C  
ANISOU 1371  CE2 PHE E   5     9951   7983   8599   1993     32  -1762       C  
ATOM   1372  CZ  PHE E   5       5.200 119.155  98.882  1.00 77.00           C  
ANISOU 1372  CZ  PHE E   5    11769   7998   9491   2083   -324  -2011       C  
ATOM   1373  H   PHE E   5       8.572 114.798  98.432  1.00 58.87           H  
ATOM   1374  HA  PHE E   5       9.613 117.316  98.271  1.00 59.22           H  
ATOM   1375  HB2 PHE E   5       8.360 116.196 100.540  1.00 71.95           H  
ATOM   1376  HB3 PHE E   5       9.195 117.548 100.597  1.00 71.95           H  
ATOM   1377  HD1 PHE E   5       8.311 119.546  99.528  1.00 94.89           H  
ATOM   1378  HD2 PHE E   5       6.186 116.175  99.642  1.00 78.59           H  
ATOM   1379  HE1 PHE E   5       6.437 120.724  98.890  1.00103.91           H  
ATOM   1380  HE2 PHE E   5       4.315 117.343  99.007  1.00 83.80           H  
ATOM   1381  HZ  PHE E   5       4.438 119.626  98.632  1.00 92.40           H  
ATOM   1382  N   ALA E   6      11.789 116.831  99.304  1.00 53.28           N  
ANISOU 1382  N   ALA E   6     7813   6204   6229  -1798   1214  -1171       N  
ATOM   1383  CA  ALA E   6      13.080 116.406  99.798  1.00 49.05           C  
ANISOU 1383  CA  ALA E   6     6831   5968   5838  -2440   1402  -1232       C  
ATOM   1384  C   ALA E   6      13.792 117.529 100.467  1.00 57.80           C  
ANISOU 1384  C   ALA E   6     8466   6788   6708  -2731   1395  -1556       C  
ATOM   1385  O   ALA E   6      13.666 118.702 100.093  1.00 59.28           O  
ANISOU 1385  O   ALA E   6     9555   6332   6638  -2715   1307  -1716       O  
ATOM   1386  CB  ALA E   6      13.986 115.880  98.670  1.00 50.04           C  
ANISOU 1386  CB  ALA E   6     6865   6012   6136  -2781   1500  -1086       C  
ATOM   1387  H   ALA E   6      11.751 117.652  99.049  1.00 63.94           H  
ATOM   1388  HA  ALA E   6      12.957 115.695 100.446  1.00 58.86           H  
ATOM   1389  HB1 ALA E   6      14.836 115.608  99.050  1.00 60.05           H  
ATOM   1390  HB2 ALA E   6      13.555 115.121  98.248  1.00 60.05           H  
ATOM   1391  HB3 ALA E   6      14.124 116.587  98.021  1.00 60.05           H  
ATOM   1392  N   GLU E   7      14.664 117.128 101.372  1.00 48.05           N  
ANISOU 1392  N   GLU E   7     6685   5977   5597  -3086   1450  -1637       N  
ATOM   1393  CA  GLU E   7      15.612 118.039 101.969  1.00 51.25           C  
ANISOU 1393  CA  GLU E   7     7454   6198   5820  -3417   1471  -1893       C  
ATOM   1394  C   GLU E   7      16.871 118.050 101.097  1.00 82.38           C  
ANISOU 1394  C   GLU E   7    11417  10046   9838  -3497   1547  -1723       C  
ATOM   1395  O   GLU E   7      17.505 116.996 100.872  1.00 58.07           O  
ANISOU 1395  O   GLU E   7     7739   7267   7056  -3307   1459  -1553       O  
ATOM   1396  CB  GLU E   7      15.910 117.579 103.393  1.00 73.21           C  
ANISOU 1396  CB  GLU E   7     9604   9578   8636  -3479   1368  -1944       C  
ATOM   1397  CG  GLU E   7      16.564 118.609 104.187  1.00 72.93           C  
ANISOU 1397  CG  GLU E   7     9972   9393   8345  -3701   1368  -2224       C  
ATOM   1398  CD  GLU E   7      16.774 118.222 105.648  1.00104.18           C  
ANISOU 1398  CD  GLU E   7    13407  13943  12232  -3806   1215  -2259       C  
ATOM   1399  OE1 GLU E   7      16.538 117.039 106.009  1.00 83.22           O  
ANISOU 1399  OE1 GLU E   7    10072  11796   9752  -3612   1051  -1933       O  
ATOM   1400  OE2 GLU E   7      17.173 119.124 106.436  1.00 90.28           O1-
ANISOU 1400  OE2 GLU E   7    11992  12107  10205  -3979   1219  -2528       O1-
ATOM   1401  H   GLU E   7      14.726 116.320 101.660  1.00 57.66           H  
ATOM   1402  HA  GLU E   7      15.240 118.934 101.997  1.00 61.50           H  
ATOM   1403  HB2 GLU E   7      15.077 117.346 103.831  1.00 87.86           H  
ATOM   1404  HB3 GLU E   7      16.497 116.807 103.360  1.00 87.86           H  
ATOM   1405  HG2 GLU E   7      17.435 118.794 103.802  1.00 87.51           H  
ATOM   1406  HG3 GLU E   7      16.019 119.411 104.168  1.00 87.51           H  
ATOM   1407  N   ASP E   8      17.177 119.219 100.538  1.00 61.49           N  
ANISOU 1407  N   ASP E   8     8552   9583   5228   -795   3375  -1715       N  
ATOM   1408  CA  ASP E   8      18.264 119.385  99.553  1.00 63.74           C  
ANISOU 1408  CA  ASP E   8     8372   9705   6142   -743   3705  -1232       C  
ATOM   1409  C   ASP E   8      19.406 120.029 100.307  1.00 78.81           C  
ANISOU 1409  C   ASP E   8     9714  11931   8300  -1467   3230  -1205       C  
ATOM   1410  O   ASP E   8      19.306 121.183 100.724  1.00 93.16           O  
ANISOU 1410  O   ASP E   8    11702  13564  10131  -2005   3056  -1735       O  
ATOM   1411  CB  ASP E   8      17.861 120.252  98.363  1.00 61.14           C  
ANISOU 1411  CB  ASP E   8     8414   8610   6207   -470   4059  -1360       C  
ATOM   1412  CG  ASP E   8      18.936 120.392  97.339  1.00 63.67           C  
ANISOU 1412  CG  ASP E   8     8321   8720   7151   -355   4545   -843       C  
ATOM   1413  OD1 ASP E   8      19.981 119.706  97.443  1.00 96.30           O  
ANISOU 1413  OD1 ASP E   8    11797  13267  11525   -385   4458   -266       O  
ATOM   1414  OD2 ASP E   8      18.739 121.178  96.374  1.00 77.50           O1-
ANISOU 1414  OD2 ASP E   8    10355   9853   9237   -160   4645   -885       O1-
ATOM   1415  H   ASP E   8      16.764 119.952 100.714  1.00 73.78           H  
ATOM   1416  HA  ASP E   8      18.550 118.517  99.228  1.00 76.49           H  
ATOM   1417  HB2 ASP E   8      17.089 119.853  97.932  1.00 73.37           H  
ATOM   1418  HB3 ASP E   8      17.638 121.140  98.684  1.00 73.37           H  
ATOM   1419  N   CYS E   9      20.426 119.261 100.557  1.00 75.11           N  
ANISOU 1419  N   CYS E   9     8589  11954   7996  -1472   2976   -647       N  
ATOM   1420  CA  CYS E   9      21.440 119.646 101.499  1.00 82.95           C  
ANISOU 1420  CA  CYS E   9     9016  13380   9123  -2109   2383   -676       C  
ATOM   1421  C   CYS E   9      22.639 119.982 100.648  1.00 86.91           C  
ANISOU 1421  C   CYS E   9     8895  13661  10467  -2201   2626   -216       C  
ATOM   1422  O   CYS E   9      23.362 119.079 100.229  1.00 87.03           O  
ANISOU 1422  O   CYS E   9     8427  13907  10733  -1865   2725    439       O  
ATOM   1423  CB  CYS E   9      21.692 118.528 102.498  1.00 84.42           C  
ANISOU 1423  CB  CYS E   9     8930  14308   8839  -2026   1884   -419       C  
ATOM   1424  SG  CYS E   9      20.284 118.437 103.693  1.00 99.06           S  
ANISOU 1424  SG  CYS E   9    11552  16367   9719  -2056   1603  -1067       S  
ATOM   1425  H   CYS E   9      20.560 118.496 100.189  1.00 90.13           H  
ATOM   1426  HA  CYS E   9      21.162 120.441 101.980  1.00 99.54           H  
ATOM   1427  HB2 CYS E   9      21.756 117.681 102.029  1.00101.31           H  
ATOM   1428  HB3 CYS E   9      22.507 118.709 102.991  1.00101.31           H  
ATOM   1429  N   GLY E  10      22.772 121.287 100.342  1.00102.43           N  
ANISOU 1429  N   GLY E  10    10920  15126  12873  -2619   2789   -563       N  
ATOM   1430  CA  GLY E  10      23.810 121.846  99.499  1.00 96.31           C  
ANISOU 1430  CA  GLY E  10     9628  13991  12973  -2758   3133   -207       C  
ATOM   1431  C   GLY E  10      25.002 122.125 100.370  1.00103.05           C  
ANISOU 1431  C   GLY E  10     9688  15263  14204  -3407   2517   -212       C  
ATOM   1432  O   GLY E  10      25.311 121.332 101.261  1.00104.85           O  
ANISOU 1432  O   GLY E  10     9604  16160  14074  -3438   1946   -104       O  
ATOM   1433  H   GLY E  10      22.233 121.888 100.637  1.00122.92           H  
ATOM   1434  HA2 GLY E  10      24.058 121.215  98.804  1.00115.57           H  
ATOM   1435  HA3 GLY E  10      23.507 122.672  99.091  1.00115.57           H  
ATOM   1436  N   SER E  11      25.653 123.263 100.169  1.00109.02           N  
ANISOU 1436  N   SER E  11    10120  15623  15680  -3920   2604   -378       N  
ATOM   1437  CA  SER E  11      26.835 123.578 100.967  1.00128.31           C  
ANISOU 1437  CA  SER E  11    11730  18421  18602  -4548   1990   -444       C  
ATOM   1438  C   SER E  11      26.558 124.653 102.010  1.00131.68           C  
ANISOU 1438  C   SER E  11    12324  18848  18859  -5221   1424  -1281       C  
ATOM   1439  O   SER E  11      26.896 124.475 103.186  1.00127.52           O  
ANISOU 1439  O   SER E  11    11488  18919  18043  -5534    629  -1544       O  
ATOM   1440  CB  SER E  11      28.019 123.991 100.066  1.00123.86           C  
ANISOU 1440  CB  SER E  11    10453  17459  19149  -4685   2439     25       C  
ATOM   1441  OG  SER E  11      27.784 125.223  99.414  1.00124.43           O  
ANISOU 1441  OG  SER E  11    10823  16753  19702  -4908   2974   -247       O  
ATOM   1442  H   SER E  11      25.439 123.861  99.588  1.00130.82           H  
ATOM   1443  HA  SER E  11      27.101 122.776 101.444  1.00153.98           H  
ATOM   1444  HB2 SER E  11      28.815 124.075 100.615  1.00148.63           H  
ATOM   1445  HB3 SER E  11      28.155 123.304  99.395  1.00148.63           H  
ATOM   1446  HG  SER E  11      27.668 125.831  99.982  1.00149.32           H  
ATOM   1447  N   ASN E  12      25.925 125.760 101.621  1.00132.84           N  
ANISOU 1447  N   ASN E  12    12992  18347  19136  -5411   1799  -1723       N  
ATOM   1448  CA  ASN E  12      25.575 126.805 102.576  1.00125.42           C  
ANISOU 1448  CA  ASN E  12    12278  17370  18005  -6021   1284  -2547       C  
ATOM   1449  C   ASN E  12      24.269 126.514 103.318  1.00119.98           C  
ANISOU 1449  C   ASN E  12    12413  16961  16215  -5824   1005  -3009       C  
ATOM   1450  O   ASN E  12      23.882 127.310 104.175  1.00125.08           O  
ANISOU 1450  O   ASN E  12    13322  17627  16576  -6271    554  -3706       O  
ATOM   1451  CB  ASN E  12      25.467 128.169 101.869  1.00127.10           C  
ANISOU 1451  CB  ASN E  12    12701  16739  18854  -6331   1815  -2838       C  
ATOM   1452  CG  ASN E  12      26.734 128.546 101.081  1.00140.90           C  
ANISOU 1452  CG  ASN E  12    13651  18103  21781  -6532   2216  -2371       C  
ATOM   1453  ND2 ASN E  12      26.737 129.749 100.510  1.00135.95           N  
ANISOU 1453  ND2 ASN E  12    13154  16723  21778  -6825   2699  -2592       N  
ATOM   1454  OD1 ASN E  12      27.685 127.768 100.984  1.00150.32           O  
ANISOU 1454  OD1 ASN E  12    14131  19652  23331  -6413   2124  -1811       O  
ATOM   1455  H   ASN E  12      25.689 125.927 100.812  1.00159.41           H  
ATOM   1456  HA  ASN E  12      26.281 126.870 103.237  1.00150.50           H  
ATOM   1457  HB2 ASN E  12      24.725 128.142 101.245  1.00152.52           H  
ATOM   1458  HB3 ASN E  12      25.314 128.857 102.535  1.00152.52           H  
ATOM   1459 HD21 ASN E  12      27.421 130.009 100.058  1.00163.14           H  
ATOM   1460 HD22 ASN E  12      26.054 130.266 100.592  1.00163.14           H  
ATOM   1461  N   LYS E  13      23.580 125.410 103.036  1.00112.08           N  
ANISOU 1461  N   LYS E  13    11809  16160  14616  -5172   1261  -2661       N  
ATOM   1462  CA  LYS E  13      22.300 125.186 103.691  1.00106.89           C  
ANISOU 1462  CA  LYS E  13    11925  15682  13006  -4992   1088  -3108       C  
ATOM   1463  C   LYS E  13      21.499 124.005 103.151  1.00101.17           C  
ANISOU 1463  C   LYS E  13    11622  15017  11801  -4235   1518  -2712       C  
ATOM   1464  O   LYS E  13      21.480 123.760 101.935  1.00 94.23           O  
ANISOU 1464  O   LYS E  13    10788  13730  11283  -3787   2168  -2287       O  
ATOM   1465  CB  LYS E  13      21.420 126.434 103.569  1.00109.10           C  
ANISOU 1465  CB  LYS E  13    12863  15370  13221  -5250   1302  -3786       C  
ATOM   1466  CG  LYS E  13      21.372 127.011 102.172  1.00103.03           C  
ANISOU 1466  CG  LYS E  13    12255  13825  13067  -5053   2108  -3591       C  
ATOM   1467  CD  LYS E  13      20.006 127.608 101.871  1.00104.80           C  
ANISOU 1467  CD  LYS E  13    13410  13554  12856  -4873   2468  -4117       C  
ATOM   1468  CE  LYS E  13      19.823 127.845 100.367  1.00112.99           C  
ANISOU 1468  CE  LYS E  13    14718  13882  14330  -4404   3331  -3813       C  
ATOM   1469  NZ  LYS E  13      18.399 127.625  99.898  1.00111.36           N1+
ANISOU 1469  NZ  LYS E  13    15388  13399  13525  -3816   3712  -4068       N1+
ATOM   1470  H   LYS E  13      23.824 124.795 102.486  1.00134.49           H  
ATOM   1471  HA  LYS E  13      22.459 125.027 104.635  1.00128.27           H  
ATOM   1472  HB2 LYS E  13      20.513 126.203 103.826  1.00130.92           H  
ATOM   1473  HB3 LYS E  13      21.765 127.119 104.162  1.00130.92           H  
ATOM   1474  HG2 LYS E  13      22.037 127.713 102.092  1.00123.63           H  
ATOM   1475  HG3 LYS E  13      21.546 126.307 101.528  1.00123.63           H  
ATOM   1476  HD2 LYS E  13      19.315 126.996 102.169  1.00125.76           H  
ATOM   1477  HD3 LYS E  13      19.921 128.460 102.327  1.00125.76           H  
ATOM   1478  HE2 LYS E  13      20.067 128.761 100.162  1.00135.58           H  
ATOM   1479  HE3 LYS E  13      20.396 127.233  99.880  1.00135.58           H  
ATOM   1480  HZ1 LYS E  13      18.341 127.774  99.022  1.00133.63           H  
ATOM   1481  HZ2 LYS E  13      18.150 126.787 100.066  1.00133.63           H  
ATOM   1482  HZ3 LYS E  13      17.849 128.181 100.323  1.00133.63           H  
ATOM   1483  N   CYS E  14      20.817 123.292 104.059  1.00 95.97           N  
ANISOU 1483  N   CYS E  14    11288  14841  10337  -4068   1168  -2874       N  
ATOM   1484  CA  CYS E  14      19.751 122.400 103.626  1.00116.68           C  
ANISOU 1484  CA  CYS E  14    14458  17385  12491  -3414   1596  -2722       C  
ATOM   1485  C   CYS E  14      18.523 123.249 103.287  1.00 92.44           C  
ANISOU 1485  C   CYS E  14    12176  13728   9219  -3391   1951  -3328       C  
ATOM   1486  O   CYS E  14      18.483 124.462 103.504  1.00106.69           O  
ANISOU 1486  O   CYS E  14    14129  15251  11156  -3886   1828  -3849       O  
ATOM   1487  CB  CYS E  14      19.418 121.340 104.692  1.00110.72           C  
ANISOU 1487  CB  CYS E  14    13785  17286  10999  -3227   1189  -2661       C  
ATOM   1488  SG  CYS E  14      20.646 119.952 105.034  1.00101.64           S  
ANISOU 1488  SG  CYS E  14    11826  16878   9914  -3006    843  -1851       S  
ATOM   1489  H   CYS E  14      20.953 123.310 104.908  1.00115.17           H  
ATOM   1490  HA  CYS E  14      20.031 121.938 102.820  1.00140.02           H  
ATOM   1491  HB2 CYS E  14      19.282 121.803 105.534  1.00132.87           H  
ATOM   1492  HB3 CYS E  14      18.585 120.915 104.432  1.00132.87           H  
ATOM   1493  N   ALA E  15      17.513 122.610 102.768  1.00 78.59           N  
ANISOU 1493  N   ALA E  15    10918  11781   7160  -2808   2373  -3290       N  
ATOM   1494  CA  ALA E  15      16.298 123.301 102.377  1.00 81.80           C  
ANISOU 1494  CA  ALA E  15    11991  11583   7508  -2613   2625  -3702       C  
ATOM   1495  C   ALA E  15      15.336 122.309 101.753  1.00 81.07           C  
ANISOU 1495  C   ALA E  15    11981  11191   7632  -1640   2607  -3055       C  
ATOM   1496  O   ALA E  15      15.742 121.463 100.953  1.00 64.74           O  
ANISOU 1496  O   ALA E  15     9727   9159   5714  -1244   2919  -2650       O  
ATOM   1497  CB  ALA E  15      16.586 124.408 101.379  1.00 92.88           C  
ANISOU 1497  CB  ALA E  15    13488  12383   9417  -2785   3081  -3881       C  
ATOM   1498  H   ALA E  15      17.495 121.762 102.627  1.00 94.30           H  
ATOM   1499  HA  ALA E  15      15.878 123.691 103.159  1.00 98.17           H  
ATOM   1500  HB1 ALA E  15      15.753 124.845 101.143  1.00111.45           H  
ATOM   1501  HB2 ALA E  15      17.192 125.048 101.784  1.00111.45           H  
ATOM   1502  HB3 ALA E  15      16.993 124.021 100.588  1.00111.45           H  
ATOM   1503  N   ILE E  16      14.057 122.459 102.028  1.00 56.65           N  
ANISOU 1503  N   ILE E  16     9157   5379   6990  -1596   -202  -1599       N  
ATOM   1504  CA  ILE E  16      13.049 121.560 101.529  1.00 60.73           C  
ANISOU 1504  CA  ILE E  16     9334   6220   7521  -1267   -155  -1620       C  
ATOM   1505  C   ILE E  16      12.644 122.028 100.158  1.00 74.62           C  
ANISOU 1505  C   ILE E  16    11399   7834   9121  -1269   -296  -1399       C  
ATOM   1506  O   ILE E  16      12.225 123.174 100.004  1.00 74.08           O  
ANISOU 1506  O   ILE E  16    11840   7306   9003  -1116   -589  -1317       O  
ATOM   1507  CB  ILE E  16      11.833 121.537 102.454  1.00 68.66           C  
ANISOU 1507  CB  ILE E  16    10233   7245   8609   -751   -215  -1863       C  
ATOM   1508  CG1 ILE E  16      12.186 120.806 103.751  1.00 71.98           C  
ANISOU 1508  CG1 ILE E  16    10350   7905   9093   -870    -74  -2043       C  
ATOM   1509  CG2 ILE E  16      10.697 120.879 101.720  1.00 64.34           C  
ANISOU 1509  CG2 ILE E  16     9431   6960   8054   -401   -207  -1884       C  
ATOM   1510  CD1 ILE E  16      11.122 120.899 104.744  1.00 88.70           C  
ANISOU 1510  CD1 ILE E  16    12413  10078  11209   -542    -77  -2343       C  
ATOM   1511  H   ILE E  16      13.742 123.094 102.516  1.00 67.99           H  
ATOM   1512  HA  ILE E  16      13.410 120.662 101.462  1.00 72.88           H  
ATOM   1513  HB  ILE E  16      11.583 122.450 102.666  1.00 82.39           H  
ATOM   1514 HG12 ILE E  16      12.336 119.868 103.557  1.00 86.37           H  
ATOM   1515 HG13 ILE E  16      12.987 121.200 104.130  1.00 86.37           H  
ATOM   1516 HG21 ILE E  16       9.919 120.859 102.298  1.00 77.20           H  
ATOM   1517 HG22 ILE E  16      10.502 121.390 100.919  1.00 77.20           H  
ATOM   1518 HG23 ILE E  16      10.957 119.975 101.482  1.00 77.20           H  
ATOM   1519 HD11 ILE E  16      11.394 120.422 105.544  1.00106.43           H  
ATOM   1520 HD12 ILE E  16      10.966 121.833 104.952  1.00106.43           H  
ATOM   1521 HD13 ILE E  16      10.315 120.502 104.379  1.00106.43           H  
ATOM   1522  N   ILE E  17      12.696 121.128  99.182  1.00 53.26           N  
ANISOU 1522  N   ILE E  17     8393   5496   6348  -1431   -140  -1318       N  
ATOM   1523  CA  ILE E  17      12.305 121.473  97.834  1.00 63.97           C  
ANISOU 1523  CA  ILE E  17    10055   6763   7488  -1519   -282  -1086       C  
ATOM   1524  C   ILE E  17      11.208 120.539  97.355  1.00 62.34           C  
ANISOU 1524  C   ILE E  17     9462   6901   7322  -1124   -243  -1131       C  
ATOM   1525  O   ILE E  17      11.071 119.442  97.870  1.00 61.35           O  
ANISOU 1525  O   ILE E  17     8786   7167   7356   -969    -22  -1319       O  
ATOM   1526  CB  ILE E  17      13.529 121.409  96.932  1.00 63.59           C  
ANISOU 1526  CB  ILE E  17    10066   6859   7235  -2262    -91   -974       C  
ATOM   1527  CG1 ILE E  17      14.070 119.961  96.898  1.00 70.99           C  
ANISOU 1527  CG1 ILE E  17    10255   8374   8346  -2426    268  -1197       C  
ATOM   1528  CG2 ILE E  17      14.600 122.318  97.518  1.00 63.66           C  
ANISOU 1528  CG2 ILE E  17    10421   6548   7218  -2646   -109   -981       C  
ATOM   1529  CD1 ILE E  17      15.001 119.648  95.741  1.00 69.46           C  
ANISOU 1529  CD1 ILE E  17     9932   8477   7982  -3118    510  -1226       C  
ATOM   1530  H   ILE E  17      12.954 120.314  99.280  1.00 63.91           H  
ATOM   1531  HA  ILE E  17      11.962 122.380  97.821  1.00 76.76           H  
ATOM   1532  HB  ILE E  17      13.299 121.700  96.036  1.00 76.30           H  
ATOM   1533 HG12 ILE E  17      14.559 119.796  97.720  1.00 85.19           H  
ATOM   1534 HG13 ILE E  17      13.317 119.353  96.840  1.00 85.19           H  
ATOM   1535 HG21 ILE E  17      15.386 122.286  96.951  1.00 76.39           H  
ATOM   1536 HG22 ILE E  17      14.256 123.225  97.557  1.00 76.39           H  
ATOM   1537 HG23 ILE E  17      14.822 122.009  98.410  1.00 76.39           H  
ATOM   1538 HD11 ILE E  17      15.285 118.723  95.807  1.00 83.35           H  
ATOM   1539 HD12 ILE E  17      14.527 119.791  94.907  1.00 83.35           H  
ATOM   1540 HD13 ILE E  17      15.772 120.235  95.789  1.00 83.35           H  
HETATM 1541  N   SAR E  18      10.438 120.956  96.348  1.00 64.27           N  
ANISOU 1541  N   SAR E  18    10024   6983   7413   -994   -500   -946       N  
HETATM 1542  CA  SAR E  18       9.543 120.035  95.700  1.00 63.59           C  
ANISOU 1542  CA  SAR E  18     9566   7268   7328   -724   -435   -973       C  
HETATM 1543  C   SAR E  18      10.140 119.457  94.591  1.00 56.82           C  
ANISOU 1543  C   SAR E  18     8594   6732   6263  -1241   -229   -834       C  
HETATM 1544  O   SAR E  18      11.019 120.003  93.980  1.00 71.07           O  
ANISOU 1544  O   SAR E  18    10765   8408   7829  -1834   -229   -665       O  
HETATM 1545  CN  SAR E  18      10.456 122.298  95.739  1.00 60.90           C  
ANISOU 1545  CN  SAR E  18    10361   5988   6791  -1163   -909   -678       C  
HETATM 1546  HN1 SAR E  18       9.578 122.726  95.860  1.00 73.08           H  
HETATM 1547  HN2 SAR E  18      10.652 122.220  94.778  1.00 73.08           H  
HETATM 1548  HN3 SAR E  18      11.146 122.843  96.169  1.00 73.08           H  
HETATM 1549  HA2 SAR E  18       9.000 119.429  96.222  1.00 76.31           H  
HETATM 1550  HA3 SAR E  18       8.950 120.726  95.318  1.00 76.31           H  
ATOM   1551  N   LEU E  19       9.664 118.289  94.203  1.00 50.14           N  
ANISOU 1551  N   LEU E  19     7219   6359   5472  -1093    -21   -933       N  
ATOM   1552  CA  LEU E  19      10.127 117.618  92.976  1.00 61.36           C  
ANISOU 1552  CA  LEU E  19     8450   8169   6695  -1600    208   -865       C  
ATOM   1553  C   LEU E  19       8.939 117.126  92.243  1.00 57.70           C  
ANISOU 1553  C   LEU E  19     7852   7901   6171  -1245    118   -811       C  
ATOM   1554  O   LEU E  19       8.293 116.197  92.677  1.00 59.39           O  
ANISOU 1554  O   LEU E  19     7551   8412   6603   -818    254  -1007       O  
ATOM   1555  CB  LEU E  19      11.092 116.453  93.267  1.00 55.03           C  
ANISOU 1555  CB  LEU E  19     6976   7822   6112  -1888    617  -1140       C  
ATOM   1556  CG  LEU E  19      12.308 117.004  93.954  1.00 59.90           C  
ANISOU 1556  CG  LEU E  19     7732   8227   6802  -2255    663  -1217       C  
ATOM   1557  CD1 LEU E  19      13.059 115.863  94.513  1.00 69.74           C  
ANISOU 1557  CD1 LEU E  19     8297   9803   8396  -2339    904  -1530       C  
ATOM   1558  CD2 LEU E  19      13.119 117.885  92.945  1.00 70.56           C  
ANISOU 1558  CD2 LEU E  19     9579   9454   7775  -2991    675  -1062       C  
ATOM   1559  H   LEU E  19       9.063 117.848  94.633  1.00 60.17           H  
ATOM   1560  HA  LEU E  19      10.587 118.261  92.414  1.00 73.63           H  
ATOM   1561  HB2 LEU E  19      10.664 115.810  93.854  1.00 66.04           H  
ATOM   1562  HB3 LEU E  19      11.364 116.035  92.435  1.00 66.04           H  
ATOM   1563  HG  LEU E  19      12.028 117.569  94.691  1.00 71.89           H  
ATOM   1564 HD11 LEU E  19      13.851 116.197  94.963  1.00 83.68           H  
ATOM   1565 HD12 LEU E  19      12.494 115.391  95.144  1.00 83.68           H  
ATOM   1566 HD13 LEU E  19      13.315 115.269  93.790  1.00 83.68           H  
ATOM   1567 HD21 LEU E  19      13.903 118.238  93.393  1.00 84.67           H  
ATOM   1568 HD22 LEU E  19      13.387 117.336  92.192  1.00 84.67           H  
ATOM   1569 HD23 LEU E  19      12.556 118.613  92.639  1.00 84.67           H  
ATOM   1570  N   MET E  20       8.657 117.732  91.101  1.00 53.50           N  
ANISOU 1570  N   MET E  20     7814   7201   5312  -1477   -134   -536       N  
ATOM   1571  CA  MET E  20       7.386 117.526  90.438  1.00 59.44           C  
ANISOU 1571  CA  MET E  20     8565   8002   6015  -1059   -368   -456       C  
ATOM   1572  C   MET E  20       7.541 116.448  89.382  1.00 69.66           C  
ANISOU 1572  C   MET E  20     9455   9877   7136  -1444    -29   -475       C  
ATOM   1573  O   MET E  20       8.509 116.461  88.617  1.00 74.15           O  
ANISOU 1573  O   MET E  20    10141  10612   7422  -2204    171   -404       O  
ATOM   1574  CB  MET E  20       6.904 118.840  89.829  1.00 72.94           C  
ANISOU 1574  CB  MET E  20    11109   9105   7498  -1055   -983   -127       C  
ATOM   1575  CG  MET E  20       5.443 118.832  89.466  1.00 91.69           C  
ANISOU 1575  CG  MET E  20    13492  11373   9975   -409  -1386   -125       C  
ATOM   1576  SD  MET E  20       4.940 120.393  88.731  1.00 98.99           S  
ANISOU 1576  SD  MET E  20    15453  11451  10707   -409  -2291    269       S  
ATOM   1577  CE  MET E  20       4.367 121.282  90.188  1.00 78.35           C  
ANISOU 1577  CE  MET E  20    12867   8270   8631    411  -2642    -58       C  
ATOM   1578  H   MET E  20       9.188 118.269  90.689  1.00 64.20           H  
ATOM   1579  HA  MET E  20       6.730 117.238  91.091  1.00 71.32           H  
ATOM   1580  HB2 MET E  20       7.048 119.554  90.469  1.00 87.52           H  
ATOM   1581  HB3 MET E  20       7.410 119.015  89.020  1.00 87.52           H  
ATOM   1582  HG2 MET E  20       5.277 118.125  88.823  1.00110.03           H  
ATOM   1583  HG3 MET E  20       4.915 118.689  90.267  1.00110.03           H  
ATOM   1584  HE1 MET E  20       4.061 122.163  89.919  1.00 94.01           H  
ATOM   1585  HE2 MET E  20       3.638 120.787  90.592  1.00 94.01           H  
ATOM   1586  HE3 MET E  20       5.101 121.364  90.816  1.00 94.01           H  
ATOM   1587  N   VAL E  21       6.584 115.512  89.352  1.00 68.12           N  
ANISOU 1587  N   VAL E  21     8757  10017   7107   -953     60   -627       N  
ATOM   1588  CA  VAL E  21       6.453 114.529  88.280  1.00 66.14           C  
ANISOU 1588  CA  VAL E  21     8141  10283   6704  -1207    311   -648       C  
ATOM   1589  C   VAL E  21       5.038 114.590  87.732  1.00 60.42           C  
ANISOU 1589  C   VAL E  21     7538   9500   5917   -705    -34   -538       C  
ATOM   1590  O   VAL E  21       4.118 113.957  88.296  1.00 59.22           O  
ANISOU 1590  O   VAL E  21     6935   9521   6044    -75     14   -767       O  
ATOM   1591  CB  VAL E  21       6.733 113.117  88.775  1.00 78.04           C  
ANISOU 1591  CB  VAL E  21     8817  12305   8528  -1121    775   -989       C  
ATOM   1592  CG1 VAL E  21       6.843 112.144  87.606  1.00 69.68           C  
ANISOU 1592  CG1 VAL E  21     7363  11781   7331  -1506   1071  -1065       C  
ATOM   1593  CG2 VAL E  21       7.967 113.102  89.612  1.00 68.07           C  
ANISOU 1593  CG2 VAL E  21     7408  10989   7465  -1413    973  -1151       C  
ATOM   1594  H   VAL E  21       5.984 115.429  89.963  1.00 81.74           H  
ATOM   1595  HA  VAL E  21       7.074 114.738  87.565  1.00 79.36           H  
ATOM   1596  HB  VAL E  21       5.993 112.828  89.333  1.00 93.64           H  
ATOM   1597 HG11 VAL E  21       7.021 111.255  87.951  1.00 83.62           H  
ATOM   1598 HG12 VAL E  21       6.007 112.147  87.113  1.00 83.62           H  
ATOM   1599 HG13 VAL E  21       7.569 112.427  87.028  1.00 83.62           H  
ATOM   1600 HG21 VAL E  21       8.130 112.196  89.918  1.00 81.68           H  
ATOM   1601 HG22 VAL E  21       8.715 113.410  89.076  1.00 81.68           H  
ATOM   1602 HG23 VAL E  21       7.840 113.691  90.372  1.00 81.68           H  
TER    1603      VAL E  21 
HETATM 1604  N   ORN F   1       6.572  97.672 104.507  1.00 77.19           N  
ANISOU 1604  N   ORN F   1     9708   6581  13040   -364   1726    404       N  
HETATM 1605  CA  ORN F   1       6.790  98.501 103.294  1.00 74.93           C  
ANISOU 1605  CA  ORN F   1     9605   6705  12161   -111   1514   -137       C  
HETATM 1606  C   ORN F   1       7.019 100.006 103.659  1.00 67.44           C  
ANISOU 1606  C   ORN F   1     8727   6430  10468     40   1894    105       C  
HETATM 1607  O   ORN F   1       6.649 100.532 104.722  1.00 67.03           O  
ANISOU 1607  O   ORN F   1     8532   6542  10393    -61   2282    620       O  
HETATM 1608  CB  ORN F   1       5.586  98.405 102.336  1.00 59.09           C  
ANISOU 1608  CB  ORN F   1     7352   4560  10539   -306   1056   -474       C  
HETATM 1609  CG  ORN F   1       5.493  97.144 101.544  1.00 72.33           C  
ANISOU 1609  CG  ORN F   1     9116   5633  12735   -379    521   -925       C  
HETATM 1610  CD  ORN F   1       6.414  97.089 100.339  1.00 72.76           C  
ANISOU 1610  CD  ORN F   1     9580   5790  12274    -12    243  -1612       C  
HETATM 1611  NE  ORN F   1       6.113  98.154  99.378  1.00 72.65           N  
ANISOU 1611  NE  ORN F   1     9566   6305  11733     70     98  -1924       N  
HETATM 1612  HA  ORN F   1       7.714  98.129 102.843  1.00 89.92           H  
HETATM 1613  HB2 ORN F   1       5.644  99.234 101.617  1.00 70.91           H  
HETATM 1614  HB3 ORN F   1       4.667  98.490 102.933  1.00 70.91           H  
HETATM 1615  HG2 ORN F   1       4.461  97.031 101.192  1.00 86.80           H  
HETATM 1616  HG3 ORN F   1       5.727  96.300 102.203  1.00 86.80           H  
HETATM 1617  HD2 ORN F   1       7.447  97.200 100.680  1.00 87.31           H  
HETATM 1618  HD3 ORN F   1       6.274  96.126  99.839  1.00 87.31           H  
HETATM 1619  HE1 ORN F   1       5.370  97.964  98.708  1.00 87.18           H  
HETATM 1620  H1  ORN F   1       7.230  97.880 105.263  1.00 92.63           H  
HETATM 1621  H2  ORN F   1       5.642  97.791 104.917  1.00 92.63           H  
HETATM 1622  H3  ORN F   1       6.665  96.668 104.334  1.00 92.63           H  
ATOM   1623  N   LEU F   2       7.645 100.727 102.690  1.00 59.25           N  
ANISOU 1623  N   LEU F   2     7940   5796   8776    298   1739   -297       N  
ATOM   1624  CA  LEU F   2       7.886 102.163 102.881  1.00 46.52           C  
ANISOU 1624  CA  LEU F   2     6445   4772   6459    424   1970   -109       C  
ATOM   1625  C   LEU F   2       6.721 102.941 102.325  1.00 61.61           C  
ANISOU 1625  C   LEU F   2     8121   6879   8408    330   1784   -239       C  
ATOM   1626  O   LEU F   2       6.187 102.548 101.291  1.00 55.63           O  
ANISOU 1626  O   LEU F   2     7250   5974   7912    262   1370   -664       O  
ATOM   1627  CB  LEU F   2       9.152 102.558 102.141  1.00 51.20           C  
ANISOU 1627  CB  LEU F   2     7382   5735   6338    705   1872   -383       C  
ATOM   1628  CG  LEU F   2      10.416 101.844 102.599  1.00 55.23           C  
ANISOU 1628  CG  LEU F   2     8106   6117   6763    856   2045   -253       C  
ATOM   1629  CD1 LEU F   2      11.515 102.276 101.683  1.00 56.85           C  
ANISOU 1629  CD1 LEU F   2     8554   6780   6268   1138   1914   -539       C  
ATOM   1630  CD2 LEU F   2      10.677 102.147 104.048  1.00 55.30           C  
ANISOU 1630  CD2 LEU F   2     8158   6145   6708    765   2480    385       C  
ATOM   1631  H   LEU F   2       7.902 100.417 101.931  1.00 71.10           H  
ATOM   1632  HA  LEU F   2       7.988 102.366 103.824  1.00 55.83           H  
ATOM   1633  HB2 LEU F   2       9.032 102.364 101.198  1.00 61.44           H  
ATOM   1634  HB3 LEU F   2       9.295 103.510 102.261  1.00 61.44           H  
ATOM   1635  HG  LEU F   2      10.297 100.886 102.503  1.00 66.28           H  
ATOM   1636 HD11 LEU F   2      12.338 101.836 101.949  1.00 68.23           H  
ATOM   1637 HD12 LEU F   2      11.284 102.026 100.775  1.00 68.23           H  
ATOM   1638 HD13 LEU F   2      11.618 103.238 101.746  1.00 68.23           H  
ATOM   1639 HD21 LEU F   2      11.484 101.686 104.326  1.00 66.36           H  
ATOM   1640 HD22 LEU F   2      10.789 103.105 104.155  1.00 66.36           H  
ATOM   1641 HD23 LEU F   2       9.923 101.841 104.576  1.00 66.36           H  
ATOM   1642  N   VAL F   3       6.295 104.018 102.965  1.00 54.36           N  
ANISOU 1642  N   VAL F   3     6908   5724   8024   -702   2209    121       N  
ATOM   1643  CA  VAL F   3       5.226 104.837 102.448  1.00 44.65           C  
ANISOU 1643  CA  VAL F   3     5354   4769   6841   -435   2064     12       C  
ATOM   1644  C   VAL F   3       5.875 106.216 102.227  1.00 48.87           C  
ANISOU 1644  C   VAL F   3     6336   5222   7012    -66   1850    -36       C  
ATOM   1645  O   VAL F   3       6.282 106.882 103.171  1.00 51.07           O  
ANISOU 1645  O   VAL F   3     6954   5411   7039    165   1999     62       O  
ATOM   1646  CB  VAL F   3       4.035 104.889 103.363  1.00 49.20           C  
ANISOU 1646  CB  VAL F   3     5488   5650   7554   -298   2396    133       C  
ATOM   1647  CG1 VAL F   3       2.991 105.789 102.801  1.00 64.97           C  
ANISOU 1647  CG1 VAL F   3     7156   7933   9598     26   2236     33       C  
ATOM   1648  CG2 VAL F   3       3.499 103.468 103.588  1.00 67.02           C  
ANISOU 1648  CG2 VAL F   3     7300   7964  10199   -748   2548    273       C  
ATOM   1649  H   VAL F   3       6.663 104.331 103.676  1.00 65.24           H  
ATOM   1650  HA  VAL F   3       4.938 104.490 101.589  1.00 53.58           H  
ATOM   1651  HB  VAL F   3       4.310 105.247 104.221  1.00 59.03           H  
ATOM   1652 HG11 VAL F   3       2.233 105.808 103.405  1.00 77.97           H  
ATOM   1653 HG12 VAL F   3       3.361 106.680 102.704  1.00 77.97           H  
ATOM   1654 HG13 VAL F   3       2.715 105.449 101.935  1.00 77.97           H  
ATOM   1655 HG21 VAL F   3       2.731 103.510 104.179  1.00 80.42           H  
ATOM   1656 HG22 VAL F   3       3.238 103.090 102.733  1.00 80.42           H  
ATOM   1657 HG23 VAL F   3       4.197 102.927 103.990  1.00 80.42           H  
ATOM   1658  N   PHE F   4       5.981 106.630 100.961  1.00 47.25           N  
ANISOU 1658  N   PHE F   4     6148   5031   6773    -30   1455   -168       N  
ATOM   1659  CA  PHE F   4       6.365 107.979 100.589  1.00 41.49           C  
ANISOU 1659  CA  PHE F   4     5730   4267   5769    292   1163   -176       C  
ATOM   1660  C   PHE F   4       5.121 108.844 100.470  1.00 42.66           C  
ANISOU 1660  C   PHE F   4     5554   4657   5997    625   1086   -274       C  
ATOM   1661  O   PHE F   4       3.986 108.355 100.475  1.00 54.17           O  
ANISOU 1661  O   PHE F   4     6493   6352   7736    575   1231   -317       O  
ATOM   1662  CB  PHE F   4       7.148 107.948  99.264  1.00 55.24           C  
ANISOU 1662  CB  PHE F   4     7624   5955   7411    156    785   -214       C  
ATOM   1663  CG  PHE F   4       8.391 107.182  99.341  1.00 42.43           C  
ANISOU 1663  CG  PHE F   4     6304   4133   5683    -85    864   -102       C  
ATOM   1664  CD1 PHE F   4       8.391 105.821  99.099  1.00 45.74           C  
ANISOU 1664  CD1 PHE F   4     6557   4518   6302   -388    979   -187       C  
ATOM   1665  CD2 PHE F   4       9.585 107.795  99.711  1.00 56.97           C  
ANISOU 1665  CD2 PHE F   4     8611   5793   7241    -12    801    118       C  
ATOM   1666  CE1 PHE F   4       9.566 105.080  99.182  1.00 55.25           C  
ANISOU 1666  CE1 PHE F   4     8047   5532   7413   -565   1061    -87       C  
ATOM   1667  CE2 PHE F   4      10.748 107.056  99.829  1.00 47.73           C  
ANISOU 1667  CE2 PHE F   4     7680   4464   5992   -222    900    268       C  
ATOM   1668  CZ  PHE F   4      10.722 105.693  99.547  1.00 49.75           C  
ANISOU 1668  CZ  PHE F   4     7754   4710   6440   -474   1048    148       C  
ATOM   1669  H   PHE F   4       5.829 106.123 100.283  1.00 56.70           H  
ATOM   1670  HA  PHE F   4       6.938 108.355 101.277  1.00 49.79           H  
ATOM   1671  HB2 PHE F   4       6.591 107.545  98.580  1.00 66.29           H  
ATOM   1672  HB3 PHE F   4       7.373 108.857  99.011  1.00 66.29           H  
ATOM   1673  HD1 PHE F   4       7.600 105.400  98.849  1.00 54.88           H  
ATOM   1674  HD2 PHE F   4       9.597 108.706  99.899  1.00 68.36           H  
ATOM   1675  HE1 PHE F   4       9.555 104.166  99.010  1.00 66.30           H  
ATOM   1676  HE2 PHE F   4      11.547 107.471 100.061  1.00 57.28           H  
ATOM   1677  HZ  PHE F   4      11.506 105.196  99.609  1.00 59.70           H  
ATOM   1678  N   PHE F   5       5.320 110.155 100.364  1.00 41.25           N  
ANISOU 1678  N   PHE F   5     5668   4415   5591    969    825   -275       N  
ATOM   1679  CA  PHE F   5       4.229 111.089 100.349  1.00 46.47           C  
ANISOU 1679  CA  PHE F   5     6094   5265   6298   1366    743   -366       C  
ATOM   1680  C   PHE F   5       4.410 112.063  99.208  1.00 47.42           C  
ANISOU 1680  C   PHE F   5     6338   5350   6328   1487    217   -408       C  
ATOM   1681  O   PHE F   5       5.530 112.461  98.887  1.00 53.18           O  
ANISOU 1681  O   PHE F   5     7505   5865   6836   1414    -57   -300       O  
ATOM   1682  CB  PHE F   5       4.136 111.840 101.643  1.00 55.11           C  
ANISOU 1682  CB  PHE F   5     7471   6288   7183   1783    958   -335       C  
ATOM   1683  CG  PHE F   5       3.863 110.937 102.818  1.00 67.73           C  
ANISOU 1683  CG  PHE F   5     8905   7991   8838   1698   1501   -259       C  
ATOM   1684  CD1 PHE F   5       2.550 110.579 103.131  1.00 74.56           C  
ANISOU 1684  CD1 PHE F   5     9165   9233   9931   1813   1817   -260       C  
ATOM   1685  CD2 PHE F   5       4.885 110.432 103.586  1.00 69.88           C  
ANISOU 1685  CD2 PHE F   5     9573   8023   8955   1485   1684   -134       C  
ATOM   1686  CE1 PHE F   5       2.256 109.758 104.215  1.00 73.59           C  
ANISOU 1686  CE1 PHE F   5     8836   9268   9859   1723   2314   -121       C  
ATOM   1687  CE2 PHE F   5       4.595 109.592 104.667  1.00 73.73           C  
ANISOU 1687  CE2 PHE F   5     9884   8632   9499   1388   2174    -33       C  
ATOM   1688  CZ  PHE F   5       3.284 109.263 104.965  1.00 75.64           C  
ANISOU 1688  CZ  PHE F   5     9521   9269   9951   1503   2483    -20       C  
ATOM   1689  H   PHE F   5       6.094 110.523 100.299  1.00 49.50           H  
ATOM   1690  HA  PHE F   5       3.396 110.610 100.213  1.00 55.77           H  
ATOM   1691  HB2 PHE F   5       4.976 112.297 101.804  1.00 66.14           H  
ATOM   1692  HB3 PHE F   5       3.413 112.484 101.584  1.00 66.14           H  
ATOM   1693  HD1 PHE F   5       1.852 110.920 102.619  1.00 89.47           H  
ATOM   1694  HD2 PHE F   5       5.767 110.652 103.390  1.00 83.85           H  
ATOM   1695  HE1 PHE F   5       1.376 109.531 104.410  1.00 88.31           H  
ATOM   1696  HE2 PHE F   5       5.286 109.255 105.190  1.00 88.48           H  
ATOM   1697  HZ  PHE F   5       3.101 108.706 105.687  1.00 90.77           H  
ATOM   1698  N   ALA F   6       3.298 112.421  98.610  1.00 46.97           N  
ANISOU 1698  N   ALA F   6     5860   5530   6457   1653     75   -515       N  
ATOM   1699  CA  ALA F   6       3.312 113.317  97.486  1.00 48.36           C  
ANISOU 1699  CA  ALA F   6     6080   5712   6582   1755   -435   -543       C  
ATOM   1700  C   ALA F   6       2.052 114.121  97.512  1.00 51.25           C  
ANISOU 1700  C   ALA F   6     6118   6267   7090   2164   -498   -633       C  
ATOM   1701  O   ALA F   6       1.000 113.652  97.949  1.00 57.49           O  
ANISOU 1701  O   ALA F   6     6432   7306   8107   2236   -168   -669       O  
ATOM   1702  CB  ALA F   6       3.399 112.565  96.132  1.00 49.69           C  
ANISOU 1702  CB  ALA F   6     6008   6008   6864   1362   -662   -588       C  
ATOM   1703  H   ALA F   6       2.513 112.155  98.839  1.00 56.36           H  
ATOM   1704  HA  ALA F   6       4.068 113.920  97.557  1.00 58.03           H  
ATOM   1705  HB1 ALA F   6       3.405 113.213  95.410  1.00 59.63           H  
ATOM   1706  HB2 ALA F   6       4.216 112.042  96.113  1.00 59.63           H  
ATOM   1707  HB3 ALA F   6       2.629 111.980  96.045  1.00 59.63           H  
ATOM   1708  N   GLU F   7       2.173 115.345  97.063  1.00 55.20           N  
ANISOU 1708  N   GLU F   7     6858   6655   7462   2437   -934   -629       N  
ATOM   1709  CA  GLU F   7       1.023 116.174  96.790  1.00 61.09           C  
ANISOU 1709  CA  GLU F   7     7286   7570   8358   2826  -1109   -716       C  
ATOM   1710  C   GLU F   7       0.527 115.829  95.398  1.00 66.06           C  
ANISOU 1710  C   GLU F   7     7465   8427   9208   2534  -1396   -741       C  
ATOM   1711  O   GLU F   7       1.296 115.891  94.441  1.00 66.21           O  
ANISOU 1711  O   GLU F   7     7688   8365   9102   2274  -1760   -685       O  
ATOM   1712  CB  GLU F   7       1.402 117.647  96.901  1.00 82.03           C  
ANISOU 1712  CB  GLU F   7    10441   9938  10789   3235  -1533   -696       C  
ATOM   1713  CG  GLU F   7       0.362 118.437  97.621  1.00 93.11           C  
ANISOU 1713  CG  GLU F   7    11736  11409  12233   3857  -1423   -818       C  
ATOM   1714  CD  GLU F   7       0.738 119.892  97.812  1.00103.46           C  
ANISOU 1714  CD  GLU F   7    13627  12370  13313   4214  -1866   -818       C  
ATOM   1715  OE1 GLU F   7       1.851 120.262  97.393  1.00 93.54           O  
ANISOU 1715  OE1 GLU F   7    12804  10863  11875   3825  -2211   -667       O  
ATOM   1716  OE2 GLU F   7      -0.088 120.656  98.377  1.00 88.09           O1-
ANISOU 1716  OE2 GLU F   7    11660  10475  11337   4622  -1767   -922       O1-
ATOM   1717  H   GLU F   7       2.926 115.729  96.904  1.00 66.24           H  
ATOM   1718  HA  GLU F   7       0.319 115.982  97.430  1.00 73.31           H  
ATOM   1719  HB2 GLU F   7       2.235 117.726  97.391  1.00 98.44           H  
ATOM   1720  HB3 GLU F   7       1.501 118.018  96.010  1.00 98.44           H  
ATOM   1721  HG2 GLU F   7      -0.464 118.406  97.113  1.00111.74           H  
ATOM   1722  HG3 GLU F   7       0.223 118.047  98.499  1.00111.74           H  
ATOM   1723  N   ASP F   8      -0.731 115.406  95.279  1.00 66.54           N  
ANISOU 1723  N   ASP F   8     6906   8796   9582   2557  -1233   -793       N  
ATOM   1724  CA  ASP F   8      -1.288 115.002  93.991  1.00 72.39           C  
ANISOU 1724  CA  ASP F   8     7219   9739  10548   2255  -1532   -819       C  
ATOM   1725  C   ASP F   8      -2.093 116.161  93.411  1.00 75.61           C  
ANISOU 1725  C   ASP F   8     7425  10250  11054   2612  -1915   -832       C  
ATOM   1726  O   ASP F   8      -3.175 116.489  93.912  1.00 96.05           O  
ANISOU 1726  O   ASP F   8     9627  13029  13837   2975  -1738   -831       O  
ATOM   1727  CB  ASP F   8      -2.157 113.761  94.128  1.00 81.33           C  
ANISOU 1727  CB  ASP F   8     7776  11114  12010   1969  -1218   -808       C  
ATOM   1728  CG  ASP F   8      -2.599 113.223  92.784  1.00 96.64           C  
ANISOU 1728  CG  ASP F   8     9380  13188  14152   1594  -1592   -849       C  
ATOM   1729  OD1 ASP F   8      -2.639 114.017  91.811  1.00107.37           O  
ANISOU 1729  OD1 ASP F   8    10786  14563  15447   1683  -2049   -878       O  
ATOM   1730  OD2 ASP F   8      -2.896 112.012  92.704  1.00 90.58           O1-
ANISOU 1730  OD2 ASP F   8     8328  12489  13598   1204  -1468   -844       O1-
ATOM   1731  H   ASP F   8      -1.285 115.344  95.934  1.00 79.85           H  
ATOM   1732  HA  ASP F   8      -0.563 114.798  93.379  1.00 86.87           H  
ATOM   1733  HB2 ASP F   8      -1.652 113.067  94.580  1.00 97.59           H  
ATOM   1734  HB3 ASP F   8      -2.951 113.983  94.639  1.00 97.59           H  
ATOM   1735  N   CYS F   9      -1.584 116.749  92.343  1.00127.01           N  
ANISOU 1735  N   CYS F   9    20603  18367   9289   2885  -3788     94       N  
ATOM   1736  CA  CYS F   9      -2.127 117.987  91.821  1.00134.79           C  
ANISOU 1736  CA  CYS F   9    19407  19798  12011   3159  -2694   2289       C  
ATOM   1737  C   CYS F   9      -3.109 117.696  90.696  1.00144.08           C  
ANISOU 1737  C   CYS F   9    20734  22867  11145   3584  -3290   3254       C  
ATOM   1738  O   CYS F   9      -2.959 116.714  89.965  1.00148.33           O  
ANISOU 1738  O   CYS F   9    22692  24623   9044   4240  -4158   2806       O  
ATOM   1739  CB  CYS F   9      -0.995 118.891  91.339  1.00141.77           C  
ANISOU 1739  CB  CYS F   9    18652  20839  14376   4427  -1272   3980       C  
ATOM   1740  SG  CYS F   9       0.238 119.170  92.625  1.00131.80           S  
ANISOU 1740  SG  CYS F   9    17298  17394  15384   3932   -703   2857       S  
ATOM   1741  H   CYS F   9      -0.915 116.446  91.896  1.00152.42           H  
ATOM   1742  HA  CYS F   9      -2.604 118.450  92.528  1.00161.75           H  
ATOM   1743  HB2 CYS F   9      -0.554 118.473  90.583  1.00170.13           H  
ATOM   1744  HB3 CYS F   9      -1.361 119.750  91.080  1.00170.13           H  
ATOM   1745  HG  CYS F   9       1.100 119.883  92.192  1.00158.16           H  
ATOM   1746  N   GLY F  10      -4.141 118.527  90.615  1.00149.24           N  
ANISOU 1746  N   GLY F  10    19980  23612  13112   3094  -2855   4464       N  
ATOM   1747  CA  GLY F  10      -5.104 118.526  89.530  1.00158.85           C  
ANISOU 1747  CA  GLY F  10    20863  26583  12908   3512  -3179   5770       C  
ATOM   1748  C   GLY F  10      -5.361 119.953  89.080  1.00175.67           C  
ANISOU 1748  C   GLY F  10    20563  28945  17238   4011  -1753   8087       C  
ATOM   1749  O   GLY F  10      -4.524 120.844  89.253  1.00175.93           O  
ANISOU 1749  O   GLY F  10    19274  28204  19368   4496   -510   8953       O  
ATOM   1750  H   GLY F  10      -4.308 119.127  91.208  1.00179.09           H  
ATOM   1751  HA2 GLY F  10      -4.760 118.015  88.781  1.00190.61           H  
ATOM   1752  HA3 GLY F  10      -5.939 118.131  89.827  1.00190.61           H  
ATOM   1753  N   SER F  11      -6.554 120.170  88.506  1.00184.59           N  
ANISOU 1753  N   SER F  11    21115  31139  17883   3848  -1986   9119       N  
ATOM   1754  CA  SER F  11      -6.995 121.511  88.120  1.00185.50           C  
ANISOU 1754  CA  SER F  11    18990  31465  20028   4203   -736  11264       C  
ATOM   1755  C   SER F  11      -7.278 122.363  89.354  1.00185.60           C  
ANISOU 1755  C   SER F  11    18044  29554  22923   3086    -70  10956       C  
ATOM   1756  O   SER F  11      -8.404 122.841  89.546  1.00176.28           O  
ANISOU 1756  O   SER F  11    16093  28337  22550   2411    -27  11467       O  
ATOM   1757  CB  SER F  11      -8.246 121.450  87.242  1.00193.34           C  
ANISOU 1757  CB  SER F  11    19721  34090  19647   4257  -1266  12318       C  
ATOM   1758  OG  SER F  11      -7.952 120.937  85.955  1.00207.19           O  
ANISOU 1758  OG  SER F  11    22112  36995  19617   5170  -1371  12173       O  
ATOM   1759  H   SER F  11      -7.125 119.552  88.330  1.00221.51           H  
ATOM   1760  HA  SER F  11      -6.290 121.942  87.612  1.00222.60           H  
ATOM   1761  HB2 SER F  11      -8.900 120.875  87.667  1.00232.00           H  
ATOM   1762  HB3 SER F  11      -8.606 122.346  87.147  1.00232.00           H  
ATOM   1763  HG  SER F  11      -8.651 120.912  85.489  1.00248.63           H  
ATOM   1764  N   ASN F  12      -6.249 122.560  90.186  1.00188.73           N  
ANISOU 1764  N   ASN F  12    18497  28366  24844   2942    441  10152       N  
ATOM   1765  CA  ASN F  12      -6.344 123.323  91.427  1.00183.30           C  
ANISOU 1765  CA  ASN F  12    17125  25653  26869   1957   1029   9684       C  
ATOM   1766  C   ASN F  12      -7.121 122.527  92.473  1.00172.24           C  
ANISOU 1766  C   ASN F  12    17165  23412  24867    485   -104   7614       C  
ATOM   1767  O   ASN F  12      -8.195 122.947  92.921  1.00172.75           O  
ANISOU 1767  O   ASN F  12    16660  23117  25861   -311    -83   7776       O  
ATOM   1768  CB  ASN F  12      -6.978 124.700  91.166  1.00193.23           C  
ANISOU 1768  CB  ASN F  12    16297  26903  30219   2182   2156  11730       C  
ATOM   1769  CG  ASN F  12      -6.124 125.851  91.697  1.00194.37           C  
ANISOU 1769  CG  ASN F  12    15143  25430  33277   2371   3425  12459       C  
ATOM   1770  ND2 ASN F  12      -6.608 126.508  92.748  1.00187.94           N  
ANISOU 1770  ND2 ASN F  12    14257  22863  34290   1508   3576  11862       N  
ATOM   1771  OD1 ASN F  12      -5.053 126.154  91.157  1.00196.04           O  
ANISOU 1771  OD1 ASN F  12    14835  25873  33778   3322   4081  13380       O  
ATOM   1772  H   ASN F  12      -5.460 122.248  90.043  1.00226.47           H  
ATOM   1773  HA  ASN F  12      -5.450 123.470  91.772  1.00219.96           H  
ATOM   1774  HB2 ASN F  12      -7.087 124.823  90.210  1.00231.88           H  
ATOM   1775  HB3 ASN F  12      -7.842 124.739  91.606  1.00231.88           H  
ATOM   1776 HD21 ASN F  12      -6.167 127.165  93.085  1.00225.53           H  
ATOM   1777 HD22 ASN F  12      -7.362 126.276  93.090  1.00225.53           H  
ATOM   1778  N   LYS F  13      -6.592 121.361  92.853  1.00165.82           N  
ANISOU 1778  N   LYS F  13    18232  22342  22430    154  -1103   5697       N  
ATOM   1779  CA  LYS F  13      -7.143 120.600  93.969  1.00157.87           C  
ANISOU 1779  CA  LYS F  13    18659  20303  21023  -1281  -2136   3608       C  
ATOM   1780  C   LYS F  13      -6.133 119.567  94.456  1.00141.09           C  
ANISOU 1780  C   LYS F  13    18357  17511  17741  -1396  -2859   1652       C  
ATOM   1781  O   LYS F  13      -6.277 118.367  94.205  1.00135.17           O  
ANISOU 1781  O   LYS F  13    19334  17586  14439  -1555  -4127    502       O  
ATOM   1782  CB  LYS F  13      -8.467 119.934  93.575  1.00159.02           C  
ANISOU 1782  CB  LYS F  13    19457  21776  19186  -1871  -3264   3499       C  
ATOM   1783  CG  LYS F  13      -9.529 119.986  94.675  1.00149.98           C  
ANISOU 1783  CG  LYS F  13    18385  19613  18988  -3344  -3620   2597       C  
ATOM   1784  CD  LYS F  13      -9.098 119.270  95.970  1.00140.94           C  
ANISOU 1784  CD  LYS F  13    18803  16794  17953  -4379  -4257    233       C  
ATOM   1785  CE  LYS F  13      -9.772 119.902  97.181  1.00139.34           C  
ANISOU 1785  CE  LYS F  13    17959  15072  19913  -5445  -3848   -174       C  
ATOM   1786  NZ  LYS F  13      -9.719 119.105  98.448  1.00127.30           N1+
ANISOU 1786  NZ  LYS F  13    17136  13365  17867  -4747  -3004  -2207       N1+
ATOM   1787  H   LYS F  13      -5.912 120.991  92.478  1.00198.99           H  
ATOM   1788  HA  LYS F  13      -7.324 121.208  94.704  1.00189.45           H  
ATOM   1789  HB2 LYS F  13      -8.825 120.385  92.795  1.00190.82           H  
ATOM   1790  HB3 LYS F  13      -8.299 119.001  93.368  1.00190.82           H  
ATOM   1791  HG2 LYS F  13      -9.710 120.914  94.893  1.00179.98           H  
ATOM   1792  HG3 LYS F  13     -10.338 119.559  94.352  1.00179.98           H  
ATOM   1793  HD2 LYS F  13      -9.360 118.337  95.925  1.00169.13           H  
ATOM   1794  HD3 LYS F  13      -8.137 119.347  96.077  1.00169.13           H  
ATOM   1795  HE2 LYS F  13      -9.345 120.755  97.358  1.00167.21           H  
ATOM   1796  HE3 LYS F  13     -10.707 120.047  96.969  1.00167.21           H  
ATOM   1797  HZ1 LYS F  13     -10.134 119.545  99.101  1.00152.76           H  
ATOM   1798  HZ2 LYS F  13     -10.119 118.319  98.329  1.00152.76           H  
ATOM   1799  HZ3 LYS F  13      -8.873 118.966  98.684  1.00152.76           H  
ATOM   1800  N   CYS F  14      -5.113 120.022  95.170  1.00130.01           N  
ANISOU 1800  N   CYS F  14    16631  14572  18193  -1335  -2112   1252       N  
ATOM   1801  CA  CYS F  14      -4.113 119.090  95.649  1.00126.05           C  
ANISOU 1801  CA  CYS F  14    17772  13421  16699  -1391  -2731   -554       C  
ATOM   1802  C   CYS F  14      -4.600 118.358  96.898  1.00117.62           C  
ANISOU 1802  C   CYS F  14    18215  11051  15424  -2887  -3727  -2795       C  
ATOM   1803  O   CYS F  14      -5.528 118.777  97.598  1.00 98.89           O  
ANISOU 1803  O   CYS F  14    14980   8444  14150  -3498  -3126  -2714       O  
ATOM   1804  CB  CYS F  14      -2.806 119.804  95.966  1.00116.65           C  
ANISOU 1804  CB  CYS F  14    15699  11090  17533   -819  -1637   -164       C  
ATOM   1805  SG  CYS F  14      -2.148 120.783  94.623  1.00119.12           S  
ANISOU 1805  SG  CYS F  14    14048  12738  18472    860   -332   2574       S  
ATOM   1806  H   CYS F  14      -4.981 120.844  95.384  1.00156.01           H  
ATOM   1807  HA  CYS F  14      -3.938 118.429  94.961  1.00151.26           H  
ATOM   1808  HB2 CYS F  14      -2.952 120.398  96.718  1.00139.98           H  
ATOM   1809  HB3 CYS F  14      -2.139 119.140  96.199  1.00139.98           H  
ATOM   1810  HG  CYS F  14      -1.940 120.067  93.683  1.00142.94           H  
ATOM   1811  N   ALA F  15      -3.954 117.235  97.160  1.00 75.72           N  
ANISOU 1811  N   ALA F  15     7878  11620   9274   1420   -792   -289       N  
ATOM   1812  CA  ALA F  15      -4.134 116.482  98.385  1.00 75.02           C  
ANISOU 1812  CA  ALA F  15     7599  11398   9508   1510   -146    -46       C  
ATOM   1813  C   ALA F  15      -2.850 115.693  98.577  1.00 60.01           C  
ANISOU 1813  C   ALA F  15     6129   9413   7258   1330      4   -144       C  
ATOM   1814  O   ALA F  15      -2.143 115.433  97.617  1.00 64.91           O  
ANISOU 1814  O   ALA F  15     6981  10072   7610   1096   -395   -423       O  
ATOM   1815  CB  ALA F  15      -5.335 115.544  98.319  1.00 94.82           C  
ANISOU 1815  CB  ALA F  15     9365  13798  12864   1314    -93     72       C  
ATOM   1816  H   ALA F  15      -3.386 116.878  96.622  1.00 90.87           H  
ATOM   1817  HA  ALA F  15      -4.247 117.088  99.134  1.00 90.03           H  
ATOM   1818  HB1 ALA F  15      -5.409 115.066  99.160  1.00113.78           H  
ATOM   1819  HB2 ALA F  15      -6.136 116.068  98.164  1.00113.78           H  
ATOM   1820  HB3 ALA F  15      -5.204 114.916  97.591  1.00113.78           H  
ATOM   1821  N   ILE F  16      -2.524 115.371  99.814  1.00 65.99           N  
ANISOU 1821  N   ILE F  16     7006  10089   7978   1467    579     94       N  
ATOM   1822  CA  ILE F  16      -1.393 114.501 100.102  1.00 64.20           C  
ANISOU 1822  CA  ILE F  16     7105   9753   7533   1301    758     57       C  
ATOM   1823  C   ILE F  16      -1.860 113.083  99.896  1.00 58.18           C  
ANISOU 1823  C   ILE F  16     5892   8767   7447    990    762     15       C  
ATOM   1824  O   ILE F  16      -2.894 112.700 100.418  1.00 66.98           O  
ANISOU 1824  O   ILE F  16     6495   9802   9153    979   1005    254       O  
ATOM   1825  CB  ILE F  16      -0.917 114.671 101.551  1.00 68.20           C  
ANISOU 1825  CB  ILE F  16     7905  10238   7769   1536   1348    368       C  
ATOM   1826  CG1 ILE F  16      -0.679 116.136 101.868  1.00 72.97           C  
ANISOU 1826  CG1 ILE F  16     8952  10997   7778   1872   1318    436       C  
ATOM   1827  CG2 ILE F  16       0.348 113.862 101.777  1.00 65.10           C  
ANISOU 1827  CG2 ILE F  16     7872   9746   7118   1365   1471    347       C  
ATOM   1828  CD1 ILE F  16       0.312 116.736 100.887  1.00 78.88           C  
ANISOU 1828  CD1 ILE F  16    10148  11815   8007   1719    750    215       C  
ATOM   1829  H   ILE F  16      -2.943 115.644 100.514  1.00 79.19           H  
ATOM   1830  HA  ILE F  16      -0.659 114.690  99.497  1.00 77.04           H  
ATOM   1831  HB  ILE F  16      -1.608 114.336 102.144  1.00 81.84           H  
ATOM   1832 HG12 ILE F  16      -1.515 116.622 101.797  1.00 87.57           H  
ATOM   1833 HG13 ILE F  16      -0.314 116.218 102.763  1.00 87.57           H  
ATOM   1834 HG21 ILE F  16       0.637 113.979 102.696  1.00 78.12           H  
ATOM   1835 HG22 ILE F  16       0.159 112.926 101.606  1.00 78.12           H  
ATOM   1836 HG23 ILE F  16       1.036 114.178 101.171  1.00 78.12           H  
ATOM   1837 HD11 ILE F  16       0.448 117.670 101.109  1.00 94.65           H  
ATOM   1838 HD12 ILE F  16       1.151 116.254 100.952  1.00 94.65           H  
ATOM   1839 HD13 ILE F  16      -0.047 116.657  99.989  1.00 94.65           H  
ATOM   1840  N   ILE F  17      -1.078 112.286  99.207  1.00 52.52           N  
ANISOU 1840  N   ILE F  17     5371   7948   6637    755    509   -259       N  
ATOM   1841  CA  ILE F  17      -1.370 110.861  99.165  1.00 55.46           C  
ANISOU 1841  CA  ILE F  17     5430   8014   7627    475    514   -295       C  
ATOM   1842  C   ILE F  17      -0.197 110.061  99.640  1.00 60.60           C  
ANISOU 1842  C   ILE F  17     6442   8513   8071    442    753   -306       C  
ATOM   1843  O   ILE F  17       0.928 110.540  99.600  1.00 48.86           O  
ANISOU 1843  O   ILE F  17     5440   7198   5927    577    768   -386       O  
ATOM   1844  CB  ILE F  17      -1.743 110.456  97.769  1.00 66.72           C  
ANISOU 1844  CB  ILE F  17     6698   9372   9280    221   -101   -673       C  
ATOM   1845  CG1 ILE F  17      -0.578 110.736  96.820  1.00 64.35           C  
ANISOU 1845  CG1 ILE F  17     6915   9257   8277    246   -435  -1056       C  
ATOM   1846  CG2 ILE F  17      -2.936 111.281  97.363  1.00 62.31           C  
ANISOU 1846  CG2 ILE F  17     5744   8968   8962    250   -338   -598       C  
ATOM   1847  CD1 ILE F  17      -0.779 110.159  95.485  1.00 69.08           C  
ANISOU 1847  CD1 ILE F  17     7449   9780   9020      6  -1005  -1475       C  
ATOM   1848  H   ILE F  17      -0.384 112.530  98.762  1.00 63.03           H  
ATOM   1849  HA  ILE F  17      -2.122 110.671  99.748  1.00 66.55           H  
ATOM   1850  HB  ILE F  17      -1.969 109.513  97.747  1.00 80.06           H  
ATOM   1851 HG12 ILE F  17      -0.477 111.696  96.719  1.00 77.22           H  
ATOM   1852 HG13 ILE F  17       0.232 110.354  97.192  1.00 77.22           H  
ATOM   1853 HG21 ILE F  17      -3.196 111.036  96.461  1.00 74.77           H  
ATOM   1854 HG22 ILE F  17      -3.665 111.105  97.978  1.00 74.77           H  
ATOM   1855 HG23 ILE F  17      -2.695 112.220  97.395  1.00 74.77           H  
ATOM   1856 HD11 ILE F  17      -0.011 110.370  94.931  1.00 82.90           H  
ATOM   1857 HD12 ILE F  17      -0.873 109.198  95.568  1.00 82.90           H  
ATOM   1858 HD13 ILE F  17      -1.582 110.539  95.095  1.00 82.90           H  
HETATM 1859  N   SAR F  18      -0.421 108.817 100.036  1.00 50.31           N  
ANISOU 1859  N   SAR F  18     4897   6881   7336    242    888   -208       N  
HETATM 1860  CA  SAR F  18       0.742 107.921 100.244  1.00 52.96           C  
ANISOU 1860  CA  SAR F  18     5579   7020   7522    198    994   -298       C  
HETATM 1861  C   SAR F  18       1.000 107.154  99.127  1.00 49.82           C  
ANISOU 1861  C   SAR F  18     5257   6450   7223     43    532   -736       C  
HETATM 1862  O   SAR F  18       0.115 106.819  98.366  1.00 63.96           O  
ANISOU 1862  O   SAR F  18     6745   8104   9453   -154    142   -917       O  
HETATM 1863  CN  SAR F  18      -1.745 108.181 100.263  1.00 55.70           C  
ANISOU 1863  CN  SAR F  18     4959   7363   8839     32    900     17       C  
HETATM 1864  HN1 SAR F  18      -1.820 107.371  99.709  1.00 66.83           H  
HETATM 1865  HN2 SAR F  18      -2.459 108.813 100.018  1.00 66.83           H  
HETATM 1866  HN3 SAR F  18      -1.833 107.939 101.206  1.00 66.83           H  
HETATM 1867  HA2 SAR F  18       1.534 108.246 100.693  1.00 63.55           H  
HETATM 1868  HA3 SAR F  18       0.279 107.299 100.856  1.00 63.55           H  
ATOM   1869  N   LEU F  19       2.266 106.842  98.909  1.00 47.94           N  
ANISOU 1869  N   LEU F  19     5447   6226   6542    139    523   -948       N  
ATOM   1870  CA  LEU F  19       2.662 105.889  97.886  1.00 60.72           C  
ANISOU 1870  CA  LEU F  19     7198   7636   8235     53    121  -1422       C  
ATOM   1871  C   LEU F  19       3.439 104.772  98.530  1.00 64.98           C  
ANISOU 1871  C   LEU F  19     7895   7836   8958     66    357  -1357       C  
ATOM   1872  O   LEU F  19       4.546 104.978  99.019  1.00 47.19           O  
ANISOU 1872  O   LEU F  19     5952   5752   6227    257    651  -1232       O  
ATOM   1873  CB  LEU F  19       3.534 106.553  96.810  1.00 60.77           C  
ANISOU 1873  CB  LEU F  19     7565   8055   7471    216   -155  -1792       C  
ATOM   1874  CG  LEU F  19       2.736 107.634  96.107  1.00 71.35           C  
ANISOU 1874  CG  LEU F  19     8750   9698   8664    171   -463  -1851       C  
ATOM   1875  CD1 LEU F  19       3.651 108.457  95.274  1.00 89.80           C  
ANISOU 1875  CD1 LEU F  19    11432  12510  10178    315   -667  -2062       C  
ATOM   1876  CD2 LEU F  19       1.642 106.974  95.259  1.00 78.64           C  
ANISOU 1876  CD2 LEU F  19     9363  10339  10178    -82   -929  -2130       C  
ATOM   1877  H   LEU F  19       2.927 107.174  99.348  1.00 57.52           H  
ATOM   1878  HA  LEU F  19       1.873 105.516  97.462  1.00 72.86           H  
ATOM   1879  HB2 LEU F  19       4.310 106.960  97.225  1.00 72.93           H  
ATOM   1880  HB3 LEU F  19       3.804 105.891  96.154  1.00 72.93           H  
ATOM   1881  HG  LEU F  19       2.315 108.208  96.765  1.00 85.63           H  
ATOM   1882 HD11 LEU F  19       3.135 109.146  94.827  1.00107.76           H  
ATOM   1883 HD12 LEU F  19       4.320 108.863  95.847  1.00107.76           H  
ATOM   1884 HD13 LEU F  19       4.079 107.885  94.618  1.00107.76           H  
ATOM   1885 HD21 LEU F  19       1.131 107.666  94.809  1.00 94.37           H  
ATOM   1886 HD22 LEU F  19       2.058 106.391  94.605  1.00 94.37           H  
ATOM   1887 HD23 LEU F  19       1.061 106.459  95.840  1.00 94.37           H  
ATOM   1888  N   MET F  20       2.883 103.577  98.509  1.00 54.67           N  
ANISOU 1888  N   MET F  20     6384   6032   8355   -151    181  -1424       N  
ATOM   1889  CA  MET F  20       3.438 102.485  99.296  1.00 53.78           C  
ANISOU 1889  CA  MET F  20     6358   5519   8558   -174    404  -1264       C  
ATOM   1890  C   MET F  20       4.367 101.633  98.459  1.00 59.87           C  
ANISOU 1890  C   MET F  20     7486   6085   9176    -41    106  -1783       C  
ATOM   1891  O   MET F  20       3.991 101.187  97.379  1.00 69.59           O  
ANISOU 1891  O   MET F  20     8736   7137  10568   -119   -390  -2248       O  
ATOM   1892  CB  MET F  20       2.311 101.625  99.876  1.00 62.76           C  
ANISOU 1892  CB  MET F  20     7060   6196  10591   -510    372   -955       C  
ATOM   1893  CG  MET F  20       2.810 100.581 100.880  1.00 72.99           C  
ANISOU 1893  CG  MET F  20     8407   7082  12244   -574    632   -660       C  
ATOM   1894  SD  MET F  20       1.500  99.716 101.792  1.00 88.24           S  
ANISOU 1894  SD  MET F  20     9765   8585  15178  -1014    674    -98       S  
ATOM   1895  CE  MET F  20       1.053 101.010 102.945  1.00 86.30           C  
ANISOU 1895  CE  MET F  20     9253   8916  14620   -904   1329    501       C  
ATOM   1896  H   MET F  20       2.186 103.368  98.051  1.00 65.60           H  
ATOM   1897  HA  MET F  20       3.939 102.858 100.038  1.00 64.54           H  
ATOM   1898  HB2 MET F  20       1.678 102.201 100.334  1.00 75.32           H  
ATOM   1899  HB3 MET F  20       1.867 101.156  99.152  1.00 75.32           H  
ATOM   1900  HG2 MET F  20       3.324  99.912 100.401  1.00 87.59           H  
ATOM   1901  HG3 MET F  20       3.378 101.023 101.530  1.00 87.59           H  
ATOM   1902  HE1 MET F  20       0.341 100.688 103.520  1.00103.55           H  
ATOM   1903  HE2 MET F  20       1.830 101.240 103.478  1.00103.55           H  
ATOM   1904  HE3 MET F  20       0.752 101.786 102.447  1.00103.55           H  
ATOM   1905  N   VAL F  21       5.557 101.339  98.991  1.00 51.70           N  
ANISOU 1905  N   VAL F  21     6733   5049   7862    168    402  -1693       N  
ATOM   1906  CA  VAL F  21       6.467 100.376  98.358  1.00 64.33           C  
ANISOU 1906  CA  VAL F  21     8643   6407   9392    359    186  -2146       C  
ATOM   1907  C   VAL F  21       6.830  99.311  99.391  1.00 76.32           C  
ANISOU 1907  C   VAL F  21    10170   7422  11407    315    410  -1846       C  
ATOM   1908  O   VAL F  21       7.721  99.507 100.217  1.00 59.57           O  
ANISOU 1908  O   VAL F  21     8175   5466   8992    463    818  -1509       O  
ATOM   1909  CB  VAL F  21       7.753 101.036  97.827  1.00 59.76           C  
ANISOU 1909  CB  VAL F  21     8398   6387   7920    719    286  -2352       C  
ATOM   1910  CG1 VAL F  21       8.579 100.030  97.079  1.00 63.75           C  
ANISOU 1910  CG1 VAL F  21     9180   6683   8359    978     64  -2866       C  
ATOM   1911  CG2 VAL F  21       7.443 102.247  96.951  1.00 69.85           C  
ANISOU 1911  CG2 VAL F  21     9660   8224   8656    727     94  -2520       C  
ATOM   1912  H   VAL F  21       5.861 101.682  99.718  1.00 62.04           H  
ATOM   1913  HA  VAL F  21       6.015  99.944  97.617  1.00 77.19           H  
ATOM   1914  HB  VAL F  21       8.278 101.345  98.581  1.00 71.71           H  
ATOM   1915 HG11 VAL F  21       9.383 100.462  96.753  1.00 76.50           H  
ATOM   1916 HG12 VAL F  21       8.813  99.305  97.680  1.00 76.50           H  
ATOM   1917 HG13 VAL F  21       8.061  99.688  96.334  1.00 76.50           H  
ATOM   1918 HG21 VAL F  21       8.277 102.632  96.638  1.00 83.82           H  
ATOM   1919 HG22 VAL F  21       6.906 101.961  96.195  1.00 83.82           H  
ATOM   1920 HG23 VAL F  21       6.954 102.899  97.476  1.00 83.82           H  
TER    1921      VAL F  21 
HETATM 1922  O   HOH S   2       8.095 112.974  99.366  1.00 42.23           O  
HETATM 1923  O   HOH S   3       9.765 112.567 100.545  1.00 40.46           O  
HETATM 1924  O   HOH S   4       0.462 103.248  97.049  1.00 67.58           O  
HETATM 1925  O   HOH S   5       1.061  96.383  88.917  1.00 61.85           O  
HETATM 1926  O   HOH S   6      15.780  91.783  94.934  1.00 44.76           O  
HETATM 1927  O   HOH S   7       5.539  90.856  82.489  1.00 66.90           O  
HETATM 1928  O   HOH S   8       3.392  94.669  94.910  1.00 62.21           O  
HETATM 1929  O   HOH S   9      18.766 103.374 103.665  1.00 64.98           O  
HETATM 1930  O   HOH S  10      14.592  91.226  93.313  1.00 44.83           O  
HETATM 1931  O   HOH S  11      16.556  91.323  92.911  1.00 44.87           O  
HETATM 1932  O   HOH S  12      27.039  84.324  97.591  1.00 60.77           O  
HETATM 1933  O   HOH S  13      19.673 106.819 103.765  1.00 60.54           O  
HETATM 1934  O   HOH S  14      13.557  87.593 110.803  1.00 70.76           O  
HETATM 1935  O   HOH S  15      11.482  87.760  80.180  1.00 75.08           O  
HETATM 1936  O   HOH S  16      10.240  98.452 105.186  1.00 70.89           O  
HETATM 1937  O   HOH S  17      13.660  88.321  79.995  1.00 59.23           O  
HETATM 1938  O   HOH S  18       3.798  97.065  97.385  1.00 72.90           O  
HETATM 1939  O   HOH S  19       7.053  81.954  91.452  1.00 63.84           O  
HETATM 1940  O   HOH S  20      15.338  85.706  80.082  1.00 79.80           O  
HETATM 1941  O   HOH S  21      15.518  89.996  81.346  1.00 66.79           O  
HETATM 1942  O   HOH S  22      19.091  92.295  81.350  1.00 60.98           O  
HETATM 1943  O   HOH S  24      10.504 119.598  89.753  1.00 68.40           O  
HETATM 1944  O   HOH S  25      24.376  96.286  80.977  1.00 66.16           O  
HETATM 1945  O   HOH S  27       8.930  92.578 108.449  1.00 65.01           O  
HETATM 1946  O   HOH S  28       8.097 111.305 100.734  1.00 38.52           O  
HETATM 1947  O   HOH S  29      21.583 123.909  98.807  1.00 76.12           O  
HETATM 1948  O   HOH S  30      21.338  88.348  83.031  1.00 76.40           O  
HETATM 1949  O   HOH S  31      28.478  95.187  98.375  1.00 71.05           O  
HETATM 1950  O   HOH S  32      23.137  98.626 100.995  1.00 72.56           O  
HETATM 1951  O   HOH S  33      22.531  94.932 103.193  1.00 82.34           O  
HETATM 1952  O   HOH S  34      23.994 108.308  98.586  1.00 79.23           O  
HETATM 1953  O   HOH S  37      14.383 125.808  97.581  1.00 76.53           O  
HETATM 1954  O   HOH S  38      16.917 125.201  97.495  1.00 70.42           O  
HETATM 1955  O   HOH S  39      29.652  85.820  84.845  1.00 85.74           O  
HETATM 1956  O   HOH S  41      19.682  91.381 104.933  1.00 83.20           O  
HETATM 1957  O   HOH S  42      16.649  97.919  87.981  1.00 88.47           O  
HETATM 1958  O   HOH S  43       4.973  84.154  93.490  1.00 90.65           O  
HETATM 1959  O   HOH S  44      -4.920 115.273  89.459  1.00 94.95           O  
HETATM 1960  C   JEF G   1      11.727 103.008  95.378  1.00100.63           C  
HETATM 1961  O   JEF G   1      12.262 104.335  95.365  1.00107.01           O  
HETATM 1962  OH  JEF G   1      10.201 101.535  93.998  1.00119.37           O  
HETATM 1963  C1  JEF G   1       8.132 101.950  92.727  1.00 92.95           C  
HETATM 1964  N1  JEF G   1      21.861 105.865  96.848  1.00 99.12           N  
HETATM 1965  C2  JEF G   1       9.496 101.250  92.775  1.00106.88           C  
HETATM 1966  O2  JEF G   1      10.339  98.946  92.862  1.00102.57           O  
HETATM 1967  C3  JEF G   1       9.215  99.742  92.541  1.00 95.94           C  
HETATM 1968  O3  JEF G   1      13.395  97.413  91.626  1.00 96.90           O  
HETATM 1969  C4  JEF G   1      12.486  98.039  92.506  1.00100.93           C  
HETATM 1970  O4  JEF G   1      16.587  98.661  92.794  1.00113.93           O  
HETATM 1971  C5  JEF G   1      11.079  98.212  91.904  1.00 99.02           C  
HETATM 1972  O5  JEF G   1      18.420 100.571  93.993  1.00113.54           O  
HETATM 1973  C6  JEF G   1      11.215  98.921  90.550  1.00 97.36           C  
HETATM 1974  O6  JEF G   1      19.947 102.816  96.403  1.00110.86           O  
HETATM 1975  C7  JEF G   1      14.700  97.237  92.133  1.00 89.07           C  
HETATM 1976  C8  JEF G   1      15.502  98.522  91.896  1.00109.64           C  
HETATM 1977  C9  JEF G   1      15.395  96.085  91.421  1.00 88.52           C  
HETATM 1978  C10 JEF G   1      17.759  99.540  94.690  1.00104.69           C  
HETATM 1979  O10 JEF G   1      12.675 107.120  96.347  1.00104.89           O  
HETATM 1980  C11 JEF G   1      16.381  99.244  94.068  1.00107.78           C  
HETATM 1981  O11 JEF G   1      10.352 107.585  95.347  1.00 86.08           O  
HETATM 1982  C12 JEF G   1      15.524 100.520  94.023  1.00 92.77           C  
HETATM 1983  O12 JEF G   1       7.667 105.905  93.706  1.00 99.50           O  
HETATM 1984  C13 JEF G   1      18.587 101.794  94.680  1.00105.26           C  
HETATM 1985  C14 JEF G   1      19.844 101.701  95.552  1.00 96.18           C  
HETATM 1986  C15 JEF G   1      18.713 102.968  93.686  1.00 97.94           C  
HETATM 1987  C16 JEF G   1      20.886 103.800  96.039  1.00101.79           C  
HETATM 1988  C17 JEF G   1      10.737 102.847  94.182  1.00108.07           C  
HETATM 1989  C18 JEF G   1      12.853 101.963  95.319  1.00 82.46           C  
HETATM 1990  C19 JEF G   1      13.743 106.230  96.067  1.00 99.30           C  
HETATM 1991  C20 JEF G   1      13.334 104.726  96.228  1.00 97.57           C  
HETATM 1992  C30 JEF G   1      20.615 105.108  96.800  1.00104.84           C  
HETATM 1993  C31 JEF G   1      20.095 104.833  98.230  1.00 93.75           C  
HETATM 1994  C32 JEF G   1      12.605 108.343  95.642  1.00 88.50           C  
HETATM 1995  C33 JEF G   1      11.144 108.732  95.329  1.00 67.11           C  
HETATM 1996  C34 JEF G   1      10.590 109.650  96.399  1.00 71.41           C  
HETATM 1997  C36 JEF G   1       9.221 107.544  94.530  1.00 83.61           C  
HETATM 1998  C37 JEF G   1       8.984 106.075  94.161  1.00 97.20           C  
HETATM 1999  C38 JEF G   1       6.790 105.343  94.647  1.00 80.11           C  
HETATM 2000  C40 JEF G   1      14.883 106.642  97.008  1.00 76.23           C  
HETATM 2001  H   JEF G   1      11.235 102.883  96.204  1.00120.76           H  
HETATM 2002 HN11 JEF G   1      22.116 105.964  97.696  1.00118.94           H  
HETATM 2003 HN12 JEF G   1      22.492 105.427  96.399  1.00118.94           H  
HETATM 2004  H2  JEF G   1      10.031 101.577  92.035  1.00128.25           H  
HETATM 2005  H5  JEF G   1      10.671  97.342  91.775  1.00118.82           H  
HETATM 2006  H7  JEF G   1      14.657  97.052  93.084  1.00106.89           H  
HETATM 2007  H11 JEF G   1      15.927  98.595  94.628  1.00129.34           H  
HETATM 2008  H12 JEF G   1       8.049 102.548  93.486  1.00111.54           H  
HETATM 2009  H13 JEF G   1      17.817 101.944  95.250  1.00126.31           H  
HETATM 2010  H19 JEF G   1      14.031 106.373  95.152  1.00119.16           H  
HETATM 2011  H30 JEF G   1      19.951 105.623  96.316  1.00125.81           H  
HETATM 2012  H31 JEF G   1       8.986  99.604  91.608  1.00115.13           H  
HETATM 2013  H32 JEF G   1       8.466  99.470  93.094  1.00115.13           H  
HETATM 2014  H33 JEF G   1      11.091 109.160  94.460  1.00 80.53           H  
HETATM 2015  H41 JEF G   1      12.416  97.504  93.312  1.00121.12           H  
HETATM 2016  H42 JEF G   1      12.834  98.913  92.742  1.00121.12           H  
HETATM 2017  H61 JEF G   1      11.606  99.799  90.683  1.00116.83           H  
HETATM 2018  H62 JEF G   1      10.339  99.015  90.145  1.00116.83           H  
HETATM 2019  H63 JEF G   1      11.788  98.398  89.968  1.00116.83           H  
HETATM 2020  H81 JEF G   1      14.910  99.283  91.999  1.00131.57           H  
HETATM 2021  H82 JEF G   1      15.846  98.513  90.989  1.00131.57           H  
HETATM 2022  H91 JEF G   1      14.889  95.269  91.557  1.00106.22           H  
HETATM 2023  H92 JEF G   1      16.289  95.975  91.781  1.00106.22           H  
HETATM 2024  H93 JEF G   1      15.449  96.278  90.472  1.00106.22           H  
HETATM 2025 H101 JEF G   1      18.301  98.736  94.658  1.00125.63           H  
HETATM 2026 H102 JEF G   1      17.639  99.807  95.615  1.00125.63           H  
HETATM 2027 H121 JEF G   1      14.585 100.281  94.069  1.00111.32           H  
HETATM 2028 H122 JEF G   1      15.697 100.997  93.196  1.00111.32           H  
HETATM 2029 H123 JEF G   1      15.750 101.087  94.777  1.00111.32           H  
HETATM 2030 H11A JEF G   1       7.426 101.285  92.761  1.00111.54           H  
HETATM 2031 H141 JEF G   1      19.801 100.894  96.089  1.00115.42           H  
HETATM 2032 H142 JEF G   1      20.627 101.663  94.981  1.00115.42           H  
HETATM 2033 H13A JEF G   1       8.058 102.458  91.905  1.00111.54           H  
HETATM 2034 H151 JEF G   1      19.468 102.813  93.097  1.00117.53           H  
HETATM 2035 H152 JEF G   1      17.901 103.035  93.160  1.00117.53           H  
HETATM 2036 H153 JEF G   1      18.850 103.794  94.177  1.00117.53           H  
HETATM 2037 H161 JEF G   1      20.824 103.966  95.085  1.00122.15           H  
HETATM 2038 H162 JEF G   1      21.779 103.485  96.252  1.00122.15           H  
HETATM 2039 H171 JEF G   1       9.997 103.460  94.316  1.00129.68           H  
HETATM 2040 H172 JEF G   1      11.200 103.102  93.369  1.00129.68           H  
HETATM 2041 H181 JEF G   1      13.234 101.849  96.204  1.00 98.95           H  
HETATM 2042 H182 JEF G   1      12.493 101.117  95.011  1.00 98.95           H  
HETATM 2043 H183 JEF G   1      13.542 102.263  94.706  1.00 98.95           H  
HETATM 2044 H201 JEF G   1      14.107 104.172  96.034  1.00117.08           H  
HETATM 2045 H202 JEF G   1      13.065 104.573  97.147  1.00117.08           H  
HETATM 2046 H311 JEF G   1      20.290 103.914  98.474  1.00112.50           H  
HETATM 2047 H312 JEF G   1      20.531 105.433  98.855  1.00112.50           H  
HETATM 2048 H313 JEF G   1      19.136 104.978  98.259  1.00112.50           H  
HETATM 2049 H321 JEF G   1      13.011 109.041  96.179  1.00106.21           H  
HETATM 2050 H322 JEF G   1      13.096 108.257  94.810  1.00106.21           H  
HETATM 2051 H341 JEF G   1       9.702 109.354  96.652  1.00 85.69           H  
HETATM 2052 H342 JEF G   1      10.543 110.556  96.055  1.00 85.69           H  
HETATM 2053 H343 JEF G   1      11.171 109.629  97.175  1.00 85.69           H  
HETATM 2054 H361 JEF G   1       9.375 108.066  93.727  1.00100.34           H  
HETATM 2055 H362 JEF G   1       8.454 107.893  95.009  1.00100.34           H  
HETATM 2056 H371 JEF G   1       9.603 105.814  93.461  1.00116.64           H  
HETATM 2057 H372 JEF G   1       9.129 105.519  94.943  1.00116.64           H  
HETATM 2058 H381 JEF G   1       5.916 105.225  94.244  1.00 96.13           H  
HETATM 2059 H382 JEF G   1       7.133 104.481  94.933  1.00 96.13           H  
HETATM 2060 H383 JEF G   1       6.717 105.932  95.413  1.00 96.13           H  
HETATM 2061 H401 JEF G   1      15.448 107.296  96.565  1.00 91.48           H  
HETATM 2062 H402 JEF G   1      14.512 107.030  97.816  1.00 91.48           H  
HETATM 2063 H403 JEF G   1      15.411 105.862  97.237  1.00 91.48           H  
HETATM 2064  N   ORN A   1     -20.426 120.611  52.154  1.00 65.29      K000 N  
ANISOU 2064  N   ORN A   1    12130   6982   5696   -452  -1139    518  K000 N  
HETATM 2065  CA  ORN A   1     -19.900 119.468  52.886  1.00 52.62      K000 C  
ANISOU 2065  CA  ORN A   1     9879   5656   4460   -181   -712    531  K000 C  
HETATM 2066  C   ORN A   1     -21.066 118.585  53.412  1.00 55.04      K000 C  
ANISOU 2066  C   ORN A   1    10464   5690   4758    152   -524    541  K000 C  
HETATM 2067  O   ORN A   1     -22.207 118.988  53.488  1.00 57.74      K000 O  
ANISOU 2067  O   ORN A   1    11414   5699   4825     88   -706    526  K000 O  
HETATM 2068  CB  ORN A   1     -19.047 119.906  54.174  1.00 54.57      K000 C  
ANISOU 2068  CB  ORN A   1     9446   6323   4965   -634   -707    572  K000 C  
HETATM 2069  CG  ORN A   1     -17.654 120.394  53.876  1.00 74.29      K000 C  
ANISOU 2069  CG  ORN A   1    11426   9214   7586   -824   -726    616  K000 C  
HETATM 2070  CD  ORN A   1     -16.744 119.263  53.523  1.00 54.14      K000 C  
ANISOU 2070  CD  ORN A   1     8439   6841   5290   -381   -395    576  K000 C  
HETATM 2071  NE  ORN A   1     -16.514 118.361  54.662  1.00 56.60      K000 N  
ANISOU 2071  NE  ORN A   1     8342   7283   5880   -232   -157    562  K000 N  
HETATM 2072  HA  ORN A   1     -19.324 118.878  52.167  1.00 63.15      K000 H  
HETATM 2073  HB2 ORN A   1     -19.583 120.691  54.725  1.00 65.48      K000 H  
HETATM 2074  HB3 ORN A   1     -18.935 119.014  54.806  1.00 65.48      K000 H  
HETATM 2075  HG2 ORN A   1     -17.692 121.105  53.043  1.00 89.15      K000 H  
HETATM 2076  HG3 ORN A   1     -17.258 120.902  54.763  1.00 89.15      K000 H  
HETATM 2077  HD2 ORN A   1     -15.780 119.678  53.215  1.00 64.97      K000 H  
HETATM 2078  HD3 ORN A   1     -17.195 118.691  52.706  1.00 64.97      K000 H  
HETATM 2079  HE1 ORN A   1     -15.879 118.713  55.377  1.00 67.92      K000 H  
HETATM 2080  H1  ORN A   1     -21.166 120.362  51.492  1.00 78.35      K000 H  
HETATM 2081  H2  ORN A   1     -20.836 121.325  52.761  1.00 78.35      K000 H  
HETATM 2082  H3  ORN A   1     -19.718 121.098  51.600  1.00 78.35      K000 H  
ATOM   2083  N   LEU A   2     -20.722 117.344  53.828  1.00 52.08      K000 N  
ANISOU 2083  N   LEU A   2     9604   5464   4719    495   -179    593  K000 N  
ATOM   2084  CA  LEU A   2     -21.693 116.451  54.427  1.00 51.54      K000 C  
ANISOU 2084  CA  LEU A   2     9660   5198   4726    776     -5    663  K000 C  
ATOM   2085  C   LEU A   2     -21.595 116.646  55.916  1.00 53.19      K000 C  
ANISOU 2085  C   LEU A   2     9537   5564   5106    388    -64    623  K000 C  
ATOM   2086  O   LEU A   2     -20.492 116.798  56.449  1.00 55.60      K000 O  
ANISOU 2086  O   LEU A   2     9307   6200   5619    166    -61    589  K000 O  
ATOM   2087  CB  LEU A   2     -21.384 114.979  54.147  1.00 49.84      K000 C  
ANISOU 2087  CB  LEU A   2     9058   5040   4838   1312    332    818  K000 C  
ATOM   2088  CG  LEU A   2     -21.446 114.563  52.694  1.00 59.10      K000 C  
ANISOU 2088  CG  LEU A   2    10480   6101   5875   1830    488    930  K000 C  
ATOM   2089  CD1 LEU A   2     -20.982 113.174  52.596  1.00 57.85      K000 C  
ANISOU 2089  CD1 LEU A   2     9778   6067   6135   2252    791   1154  K000 C  
ATOM   2090  CD2 LEU A   2     -22.870 114.693  52.189  1.00 61.26      K000 C  
ANISOU 2090  CD2 LEU A   2    11562   5985   5729   2139    477    979  K000 C  
ATOM   2091  H   LEU A   2     -19.919 117.040  53.829  1.00 62.49      K000 H  
ATOM   2092  HA  LEU A   2     -22.590 116.663  54.126  1.00 61.85      K000 H  
ATOM   2093  HB2 LEU A   2     -20.489 114.788  54.467  1.00 59.80      K000 H  
ATOM   2094  HB3 LEU A   2     -22.024 114.435  54.632  1.00 59.80      K000 H  
ATOM   2095  HG  LEU A   2     -20.866 115.129  52.160  1.00 70.92      K000 H  
ATOM   2096 HD11 LEU A   2     -21.017 112.895  51.668  1.00 69.42      K000 H  
ATOM   2097 HD12 LEU A   2     -20.071 113.122  52.925  1.00 69.42      K000 H  
ATOM   2098 HD13 LEU A   2     -21.561 112.611  53.133  1.00 69.42      K000 H  
ATOM   2099 HD21 LEU A   2     -22.900 114.424  51.258  1.00 73.51      K000 H  
ATOM   2100 HD22 LEU A   2     -23.445 114.118  52.718  1.00 73.51      K000 H  
ATOM   2101 HD23 LEU A   2     -23.153 115.616  52.277  1.00 73.51      K000 H  
ATOM   2102  N   VAL A   3     -22.726 116.558  56.592  1.00 51.01      K000 N  
ANISOU 2102  N   VAL A   3     7026   5680   6677  -1211   -184    918  K000 N  
ATOM   2103  CA  VAL A   3     -22.733 116.662  58.062  1.00 49.06      K000 C  
ANISOU 2103  CA  VAL A   3     6983   5215   6442  -1201    -21    910  K000 C  
ATOM   2104  C   VAL A   3     -23.437 115.386  58.546  1.00 47.37      K000 C  
ANISOU 2104  C   VAL A   3     6887   5109   6003   -901   -100    834  K000 C  
ATOM   2105  O   VAL A   3     -24.586 115.120  58.167  1.00 47.26      K000 O  
ANISOU 2105  O   VAL A   3     7054   5131   5771   -680   -229    736  K000 O  
ATOM   2106  CB  VAL A   3     -23.425 117.899  58.548  1.00 50.85      K000 C  
ANISOU 2106  CB  VAL A   3     7575   5129   6619  -1324     24    907  K000 C  
ATOM   2107  CG1 VAL A   3     -23.482 117.875  60.105  1.00 57.38      K000 C  
ANISOU 2107  CG1 VAL A   3     8655   5795   7352  -1303    212    928  K000 C  
ATOM   2108  CG2 VAL A   3     -22.713 119.136  58.056  1.00 59.01      K000 C  
ANISOU 2108  CG2 VAL A   3     8411   6071   7939  -1650     65   1028  K000 C  
ATOM   2109  H   VAL A   3     -23.501 116.419  56.247  1.00 61.22      K000 H  
ATOM   2110  HA  VAL A   3     -21.822 116.663  58.396  1.00 58.87      K000 H  
ATOM   2111  HB  VAL A   3     -24.334 117.913  58.209  1.00 61.03      K000 H  
ATOM   2112 HG11 VAL A   3     -23.932 118.677  60.416  1.00 68.86      K000 H  
ATOM   2113 HG12 VAL A   3     -23.974 117.089  60.390  1.00 68.86      K000 H  
ATOM   2114 HG13 VAL A   3     -22.578 117.845  60.453  1.00 68.86      K000 H  
ATOM   2115 HG21 VAL A   3     -23.180 119.921  58.384  1.00 70.81      K000 H  
ATOM   2116 HG22 VAL A   3     -21.802 119.129  58.389  1.00 70.81      K000 H  
ATOM   2117 HG23 VAL A   3     -22.711 119.133  57.086  1.00 70.81      K000 H  
ATOM   2118  N   PHE A   4     -22.716 114.545  59.285  1.00 45.66      K000 N  
ANISOU 2118  N   PHE A   4     6532   4947   5868   -874    -61    873  K000 N  
ATOM   2119  CA  PHE A   4     -23.292 113.385  59.943  1.00 45.38      K000 C  
ANISOU 2119  CA  PHE A   4     6605   4962   5675   -644   -185    837  K000 C  
ATOM   2120  C   PHE A   4     -23.627 113.762  61.392  1.00 48.97      K000 C  
ANISOU 2120  C   PHE A   4     7502   5127   5977   -634   -107    789  K000 C  
ATOM   2121  O   PHE A   4     -23.097 114.727  61.931  1.00 55.53      K000 O  
ANISOU 2121  O   PHE A   4     8450   5794   6856   -818    107    806  K000 O  
ATOM   2122  CB  PHE A   4     -22.341 112.204  59.935  1.00 44.57      K000 C  
ANISOU 2122  CB  PHE A   4     6151   5040   5745   -656   -283    924  K000 C  
ATOM   2123  CG  PHE A   4     -21.972 111.743  58.533  1.00 44.46      K000 C  
ANISOU 2123  CG  PHE A   4     5697   5347   5847   -708   -366   1046  K000 C  
ATOM   2124  CD1 PHE A   4     -21.014 112.399  57.816  1.00 65.55      K000 C  
ANISOU 2124  CD1 PHE A   4     8148   8033   8725   -928   -309   1121  K000 C  
ATOM   2125  CD2 PHE A   4     -22.681 110.747  57.954  1.00 56.44      K000 C  
ANISOU 2125  CD2 PHE A   4     7041   7160   7244   -530   -488   1099  K000 C  
ATOM   2126  CE1 PHE A   4     -20.734 112.001  56.527  1.00 59.29      K000 C  
ANISOU 2126  CE1 PHE A   4     7014   7542   7971   -997   -409   1265  K000 C  
ATOM   2127  CE2 PHE A   4     -22.388 110.340  56.686  1.00 59.71      K000 C  
ANISOU 2127  CE2 PHE A   4     7079   7922   7687   -590   -521   1243  K000 C  
ATOM   2128  CZ  PHE A   4     -21.411 110.978  56.004  1.00 47.27      K000 C  
ANISOU 2128  CZ  PHE A   4     5348   6340   6271   -837   -493   1327  K000 C  
ATOM   2129  H   PHE A   4     -21.872 114.631  59.421  1.00 54.79      K000 H  
ATOM   2130  HA  PHE A   4     -24.111 113.127  59.491  1.00 54.46      K000 H  
ATOM   2131  HB2 PHE A   4     -21.522 112.456  60.391  1.00 53.49      K000 H  
ATOM   2132  HB3 PHE A   4     -22.759 111.459  60.394  1.00 53.49      K000 H  
ATOM   2133  HD1 PHE A   4     -20.542 113.103  58.200  1.00 78.66      K000 H  
ATOM   2134  HD2 PHE A   4     -23.342 110.307  58.439  1.00 67.73      K000 H  
ATOM   2135  HE1 PHE A   4     -20.063 112.421  56.040  1.00 71.15      K000 H  
ATOM   2136  HE2 PHE A   4     -22.856 109.638  56.295  1.00 71.66      K000 H  
ATOM   2137  HZ  PHE A   4     -21.219 110.708  55.134  1.00 56.72      K000 H  
ATOM   2138  N   PHE A   5     -24.547 113.013  61.992  1.00 48.67      K000 N  
ANISOU 2138  N   PHE A   5     7694   5052   5748   -419   -280    755  K000 N  
ATOM   2139  CA  PHE A   5     -25.020 113.302  63.351  1.00 48.75      K000 C  
ANISOU 2139  CA  PHE A   5     8192   4793   5537   -407   -269    741  K000 C  
ATOM   2140  C   PHE A   5     -24.688 112.118  64.241  1.00 54.95      K000 C  
ANISOU 2140  C   PHE A   5     9010   5600   6270   -315   -433    736  K000 C  
ATOM   2141  O   PHE A   5     -24.641 110.967  63.790  1.00 52.04      K000 O  
ANISOU 2141  O   PHE A   5     8321   5428   6024   -198   -646    764  K000 O  
ATOM   2142  CB  PHE A   5     -26.461 113.609  63.386  1.00 54.16      K000 C  
ANISOU 2142  CB  PHE A   5     9218   5312   6046   -254   -420    721  K000 C  
ATOM   2143  CG  PHE A   5     -26.771 114.841  62.629  1.00 70.07      K000 C  
ANISOU 2143  CG  PHE A   5    11295   7218   8111   -381   -327    715  K000 C  
ATOM   2144  CD1 PHE A   5     -26.634 116.079  63.239  1.00 64.22      K000 C  
ANISOU 2144  CD1 PHE A   5    10827   6237   7336   -646   -148    805  K000 C  
ATOM   2145  CD2 PHE A   5     -27.101 114.784  61.274  1.00 75.68      K000 C  
ANISOU 2145  CD2 PHE A   5    11768   8090   8898   -265   -413    636  K000 C  
ATOM   2146  CE1 PHE A   5     -26.919 117.264  62.542  1.00 73.02      K000 C  
ANISOU 2146  CE1 PHE A   5    11992   7206   8547   -820   -134    837  K000 C  
ATOM   2147  CE2 PHE A   5     -27.377 115.957  60.578  1.00 79.09      K000 C  
ANISOU 2147  CE2 PHE A   5    12318   8368   9364   -403   -403    612  K000 C  
ATOM   2148  CZ  PHE A   5     -27.281 117.198  61.230  1.00 68.66      K000 C  
ANISOU 2148  CZ  PHE A   5    11270   6748   8069   -700   -294    724  K000 C  
ATOM   2149  H   PHE A   5     -24.918 112.326  61.633  1.00 58.41      K000 H  
ATOM   2150  HA  PHE A   5     -24.543 114.075  63.692  1.00 58.50      K000 H  
ATOM   2151  HB2 PHE A   5     -26.955 112.875  62.988  1.00 64.99      K000 H  
ATOM   2152  HB3 PHE A   5     -26.738 113.740  64.307  1.00 64.99      K000 H  
ATOM   2153  HD1 PHE A   5     -26.407 116.121  64.139  1.00 77.06      K000 H  
ATOM   2154  HD2 PHE A   5     -27.184 113.961  60.849  1.00 90.82      K000 H  
ATOM   2155  HE1 PHE A   5     -26.846 118.088  62.968  1.00 87.63      K000 H  
ATOM   2156  HE2 PHE A   5     -27.622 115.920  59.681  1.00 94.91      K000 H  
ATOM   2157  HZ  PHE A   5     -27.452 117.982  60.759  1.00 82.39      K000 H  
ATOM   2158  N   ALA A   6     -24.220 112.445  65.438  1.00 48.85      K000 N  
ANISOU 2158  N   ALA A   6     8572   4651   5338   -413   -304    711  K000 N  
ATOM   2159  CA  ALA A   6     -23.851 111.453  66.429  1.00 48.09      K000 C  
ANISOU 2159  CA  ALA A   6     8637   4504   5130   -347   -492    668  K000 C  
ATOM   2160  C   ALA A   6     -24.312 111.959  67.784  1.00 50.90      K000 C  
ANISOU 2160  C   ALA A   6     9611   4635   5094   -369   -430    662  K000 C  
ATOM   2161  O   ALA A   6     -24.449 113.175  67.983  1.00 51.82      K000 O  
ANISOU 2161  O   ALA A   6     9933   4666   5091   -506   -127    710  K000 O  
ATOM   2162  CB  ALA A   6     -22.368 111.220  66.460  1.00 47.57      K000 C  
ANISOU 2162  CB  ALA A   6     8337   4483   5256   -439   -383    596  K000 C  
ATOM   2163  H   ALA A   6     -24.104 113.255  65.702  1.00 58.62      K000 H  
ATOM   2164  HA  ALA A   6     -24.297 110.614  66.239  1.00 57.71      K000 H  
ATOM   2165  HB1 ALA A   6     -22.167 110.553  67.135  1.00 57.09      K000 H  
ATOM   2166  HB2 ALA A   6     -22.080 110.907  65.589  1.00 57.09      K000 H  
ATOM   2167  HB3 ALA A   6     -21.922 112.054  66.677  1.00 57.09      K000 H  
ATOM   2168  N   GLU A   7     -24.597 111.021  68.680  1.00 52.74      K000 N  
ANISOU 2168  N   GLU A   7    10133   4778   5129   -262   -751    645  K000 N  
ATOM   2169  CA  GLU A   7     -24.769 111.346  70.104  1.00 56.12      K000 C  
ANISOU 2169  CA  GLU A   7    11202   5014   5107   -305   -712    636  K000 C  
ATOM   2170  C   GLU A   7     -23.403 111.144  70.716  1.00 59.72      K000 C  
ANISOU 2170  C   GLU A   7    11717   5480   5495   -348   -551    469  K000 C  
ATOM   2171  O   GLU A   7     -22.790 110.098  70.477  1.00 56.37      K000 O  
ANISOU 2171  O   GLU A   7    11033   5088   5297   -285   -824    390  K000 O  
ATOM   2172  CB  GLU A   7     -25.762 110.438  70.799  1.00 58.32      K000 C  
ANISOU 2172  CB  GLU A   7    11816   5157   5186   -165  -1212    698  K000 C  
ATOM   2173  CG  GLU A   7     -27.169 110.749  70.502  1.00 71.27      K000 C  
ANISOU 2173  CG  GLU A   7    13552   6704   6824    -73  -1374    833  K000 C  
ATOM   2174  CD  GLU A   7     -28.122 109.865  71.282  1.00 77.56      K000 C  
ANISOU 2174  CD  GLU A   7    14675   7338   7455     82  -1905    912  K000 C  
ATOM   2175  OE1 GLU A   7     -27.646 109.066  72.122  1.00 89.02      K000 O  
ANISOU 2175  OE1 GLU A   7    16332   8749   8744     70  -2148    868  K000 O  
ATOM   2176  OE2 GLU A   7     -29.339 109.973  71.038  1.00 83.62      K000 O1-
ANISOU 2176  OE2 GLU A   7    15501   7994   8276    228  -2118   1007  K000 O1-
ATOM   2177  H   GLU A   7     -24.698 110.187  68.495  1.00 63.29      K000 H  
ATOM   2178  HA  GLU A   7     -25.041 112.271  70.213  1.00 67.34      K000 H  
ATOM   2179  HB2 GLU A   7     -25.596 109.523  70.520  1.00 69.98      K000 H  
ATOM   2180  HB3 GLU A   7     -25.638 110.516  71.758  1.00 69.98      K000 H  
ATOM   2181  HG2 GLU A   7     -27.348 111.672  70.740  1.00 85.53      K000 H  
ATOM   2182  HG3 GLU A   7     -27.333 110.610  69.556  1.00 85.53      K000 H  
ATOM   2183  N   ASP A   8     -22.862 112.180  71.330  1.00 59.10      K000 N  
ANISOU 2183  N   ASP A   8    11885   5390   5181   -453    -87    423  K000 N  
ATOM   2184  CA  ASP A   8     -21.562 112.120  71.983  1.00 61.14      K000 C  
ANISOU 2184  CA  ASP A   8    12244   5651   5333   -425    140    207  K000 C  
ATOM   2185  C   ASP A   8     -21.873 111.898  73.442  1.00 65.61      K000 C  
ANISOU 2185  C   ASP A   8    13545   6092   5293   -387     37    153  K000 C  
ATOM   2186  O   ASP A   8     -22.414 112.797  74.096  1.00 68.22      K000 O  
ANISOU 2186  O   ASP A   8    14266   6424   5230   -489    318    283  K000 O  
ATOM   2187  CB  ASP A   8     -20.808 113.419  71.745  1.00 61.43      K000 C  
ANISOU 2187  CB  ASP A   8    12045   5808   5488   -528    758    202  K000 C  
ATOM   2188  CG  ASP A   8     -19.374 113.396  72.218  1.00 70.54      K000 C  
ANISOU 2188  CG  ASP A   8    13177   6978   6647   -423   1032    -61  K000 C  
ATOM   2189  OD1 ASP A   8     -18.966 112.469  72.948  1.00 65.84      K000 O  
ANISOU 2189  OD1 ASP A   8    12913   6262   5842   -280    766   -273  K000 O  
ATOM   2190  OD2 ASP A   8     -18.628 114.337  71.841  1.00 85.70      K000 O1-
ANISOU 2190  OD2 ASP A   8    14737   9011   8814   -470   1497    -67  K000 O1-
ATOM   2191  H   ASP A   8     -23.236 112.952  71.385  1.00 70.92      K000 H  
ATOM   2192  HA  ASP A   8     -21.043 111.375  71.643  1.00 73.36      K000 H  
ATOM   2193  HB2 ASP A   8     -20.803 113.607  70.794  1.00 73.72      K000 H  
ATOM   2194  HB3 ASP A   8     -21.264 114.134  72.217  1.00 73.72      K000 H  
ATOM   2195  N   CYS A   9     -21.577 110.704  73.939  1.00 66.97      K000 N  
ANISOU 2195  N   CYS A   9    13920   6144   5380   -273   -411     -3  K000 N  
ATOM   2196  CA  CYS A   9     -21.981 110.296  75.283  1.00 71.51      K000 C  
ANISOU 2196  CA  CYS A   9    15240   6572   5360   -239   -673    -47  K000 C  
ATOM   2197  C   CYS A   9     -20.795 110.236  76.234  1.00 81.71      K000 C  
ANISOU 2197  C   CYS A   9    16935   7818   6294   -145   -474   -373  K000 C  
ATOM   2198  O   CYS A   9     -19.779 109.604  75.934  1.00 75.12      K000 O  
ANISOU 2198  O   CYS A   9    15851   6918   5775    -49   -614   -599  K000 O  
ATOM   2199  CB  CYS A   9     -22.686 108.949  75.197  1.00 70.96      K000 C  
ANISOU 2199  CB  CYS A   9    15150   6367   5445   -182  -1437     37  K000 C  
ATOM   2200  SG  CYS A   9     -24.182 109.034  74.155  1.00 75.29      K000 S  
ANISOU 2200  SG  CYS A   9    15273   6982   6352   -187  -1628    364  K000 S  
ATOM   2201  H   CYS A   9     -21.136 110.101  73.512  1.00 80.36      K000 H  
ATOM   2202  HA  CYS A   9     -22.613 110.944  75.633  1.00 85.82      K000 H  
ATOM   2203  HB2 CYS A   9     -22.082 108.297  74.808  1.00 85.15      K000 H  
ATOM   2204  HB3 CYS A   9     -22.952 108.670  76.087  1.00 85.15      K000 H  
ATOM   2205  N   GLY A  10     -20.917 110.935  77.368  1.00 80.47      K000 N  
ANISOU 2205  N   GLY A  10    17414   7695   5465   -168   -130   -394  K000 N  
ATOM   2206  CA  GLY A  10     -20.042 110.752  78.502  1.00 86.02      K000 C  
ANISOU 2206  CA  GLY A  10    18702   8348   5631    -30    -14   -730  K000 C  
ATOM   2207  C   GLY A  10     -20.649 109.802  79.523  1.00 89.84      K000 C  
ANISOU 2207  C   GLY A  10    19921   8619   5595    -17   -669   -750  K000 C  
ATOM   2208  O   GLY A  10     -21.603 109.082  79.246  1.00 97.19      K000 O  
ANISOU 2208  O   GLY A  10    20773   9421   6735    -85  -1288   -524  K000 O  
ATOM   2209  H   GLY A  10     -21.520 111.535  77.496  1.00 96.56      K000 H  
ATOM   2210  HA2 GLY A  10     -19.194 110.388  78.205  1.00103.22      K000 H  
ATOM   2211  HA3 GLY A  10     -19.881 111.607  78.931  1.00103.22      K000 H  
ATOM   2212  N   SER A  11     -20.066 109.811  80.731  1.00 96.17      K000 N  
ANISOU 2212  N   SER A  11    21450   9393   5698     92   -528  -1036  K000 N  
ATOM   2213  CA  SER A  11     -20.504 108.873  81.752  1.00107.08      K000 C  
ANISOU 2213  CA  SER A  11    23326  10558   6801    102  -1178  -1031  K000 C  
ATOM   2214  C   SER A  11     -22.000 108.984  81.968  1.00120.84      K000 C  
ANISOU 2214  C   SER A  11    25175  12271   8469    -82  -1455   -594  K000 C  
ATOM   2215  O   SER A  11     -22.732 107.992  81.876  1.00127.80      K000 O  
ANISOU 2215  O   SER A  11    26016  12937   9605   -111  -2200   -451  K000 O  
ATOM   2216  CB  SER A  11     -19.753 109.147  83.045  1.00108.35      K000 C  
ANISOU 2216  CB  SER A  11    23989  10784   6395    238   -818  -1303  K000 C  
ATOM   2217  OG  SER A  11     -19.758 110.546  83.279  1.00124.97      K000 O  
ANISOU 2217  OG  SER A  11    26074  13223   8187    182     44  -1185  K000 O  
ATOM   2218  H   SER A  11     -19.432 110.340  80.971  1.00115.40      K000 H  
ATOM   2219  HA  SER A  11     -20.301 107.968  81.467  1.00128.49      K000 H  
ATOM   2220  HB2 SER A  11     -20.197 108.695  83.778  1.00130.02      K000 H  
ATOM   2221  HB3 SER A  11     -18.838 108.838  82.959  1.00130.02      K000 H  
ATOM   2222  HG  SER A  11     -19.348 110.718  83.991  1.00149.97      K000 H  
ATOM   2223  N   ASN A  12     -22.480 110.201  82.205  1.00101.79      K000 N  
ANISOU 2223  N   ASN A  12    22822  10060   5794   -210   -872   -363  K000 N  
ATOM   2224  CA  ASN A  12     -23.863 110.416  82.594  1.00103.20      K000 C  
ANISOU 2224  CA  ASN A  12    23167  10161   5885   -379  -1122     15  K000 C  
ATOM   2225  C   ASN A  12     -24.742 111.048  81.514  1.00119.91      K000 C  
ANISOU 2225  C   ASN A  12    24831  12317   8413   -505  -1034    339  K000 C  
ATOM   2226  O   ASN A  12     -25.966 110.929  81.597  1.00106.44      K000 O  
ANISOU 2226  O   ASN A  12    23165  10455   6821   -582  -1445    602  K000 O  
ATOM   2227  CB  ASN A  12     -23.896 111.291  83.846  1.00110.34      K000 C  
ANISOU 2227  CB  ASN A  12    24535  11222   6168   -474   -652     82  K000 C  
ATOM   2228  CG  ASN A  12     -23.286 110.581  85.057  1.00138.74      K000 C  
ANISOU 2228  CG  ASN A  12    28679  14742   9293   -341   -863   -206  K000 C  
ATOM   2229  ND2 ASN A  12     -22.699 111.347  85.969  1.00138.80      K000 N  
ANISOU 2229  ND2 ASN A  12    28987  15008   8741   -321   -250   -312  K000 N  
ATOM   2230  OD1 ASN A  12     -23.341 109.352  85.163  1.00144.73      K000 O  
ANISOU 2230  OD1 ASN A  12    29562  15223  10208   -257  -1578   -321  K000 O  
ATOM   2231  H   ASN A  12     -22.019 110.924  82.146  1.00122.15      K000 H  
ATOM   2232  HA  ASN A  12     -24.255 109.559  82.824  1.00123.84      K000 H  
ATOM   2233  HB2 ASN A  12     -23.386 112.100  83.682  1.00132.41      K000 H  
ATOM   2234  HB3 ASN A  12     -24.816 111.512  84.056  1.00132.41      K000 H  
ATOM   2235 HD21 ASN A  12     -22.344 110.991  86.667  1.00166.56      K000 H  
ATOM   2236 HD22 ASN A  12     -22.676 112.201  85.863  1.00166.56      K000 H  
ATOM   2237  N   LYS A  13     -24.179 111.717  80.516  1.00 93.54      K000 N  
ANISOU 2237  N   LYS A  13    21068   9155   5319   -515   -533    317  K000 N  
ATOM   2238  CA  LYS A  13     -25.016 112.522  79.642  1.00 89.97      K000 C  
ANISOU 2238  CA  LYS A  13    20260   8730   5195   -659   -385    643  K000 C  
ATOM   2239  C   LYS A  13     -24.542 112.411  78.204  1.00 83.59      K000 C  
ANISOU 2239  C   LYS A  13    18687   7992   5080   -584   -306    552  K000 C  
ATOM   2240  O   LYS A  13     -23.398 112.068  77.948  1.00 82.41      K000 O  
ANISOU 2240  O   LYS A  13    18247   7925   5139   -465   -154    259  K000 O  
ATOM   2241  CB  LYS A  13     -25.019 113.992  80.080  1.00 93.37      K000 C  
ANISOU 2241  CB  LYS A  13    20739   9352   5385   -866    319    831  K000 C  
ATOM   2242  CG  LYS A  13     -23.638 114.624  80.230  1.00112.46      K000 C  
ANISOU 2242  CG  LYS A  13    23058  12052   7620   -828   1080    610  K000 C  
ATOM   2243  CD  LYS A  13     -23.487 115.967  79.453  1.00101.11      K000 C  
ANISOU 2243  CD  LYS A  13    21122  10807   6487  -1020   1728    834  K000 C  
ATOM   2244  CE  LYS A  13     -23.304 115.754  77.981  1.00105.89      K000 C  
ANISOU 2244  CE  LYS A  13    21018  11358   7857   -960   1588    771  K000 C  
ATOM   2245  NZ  LYS A  13     -22.924 117.008  77.228  1.00111.85      K000 N1+
ANISOU 2245  NZ  LYS A  13    21183  12293   9023  -1130   2176    921  K000 N1+
ATOM   2246  H   LYS A  13     -23.340 111.721  80.328  1.00112.25      K000 H  
ATOM   2247  HA  LYS A  13     -25.929 112.194  79.685  1.00107.97      K000 H  
ATOM   2248  HB2 LYS A  13     -25.507 114.511  79.421  1.00112.04      K000 H  
ATOM   2249  HB3 LYS A  13     -25.465 114.057  80.939  1.00112.04      K000 H  
ATOM   2250  HG2 LYS A  13     -23.474 114.802  81.169  1.00134.95      K000 H  
ATOM   2251  HG3 LYS A  13     -22.971 114.007  79.890  1.00134.95      K000 H  
ATOM   2252  HD2 LYS A  13     -24.287 116.500  79.583  1.00121.33      K000 H  
ATOM   2253  HD3 LYS A  13     -22.711 116.443  79.788  1.00121.33      K000 H  
ATOM   2254  HE2 LYS A  13     -22.599 115.101  77.845  1.00127.07      K000 H  
ATOM   2255  HE3 LYS A  13     -24.136 115.424  77.607  1.00127.07      K000 H  
ATOM   2256  HZ1 LYS A  13     -22.828 116.825  76.362  1.00134.22      K000 H  
ATOM   2257  HZ2 LYS A  13     -23.558 117.625  77.325  1.00134.22      K000 H  
ATOM   2258  HZ3 LYS A  13     -22.156 117.330  77.542  1.00134.22      K000 H  
ATOM   2259  N   CYS A  14     -25.457 112.720  77.274  1.00 52.77      K000 N  
ANISOU 2259  N   CYS A  14     9705   5061   5282    178  -1067    148  K000 N  
ATOM   2260  CA  CYS A  14     -25.247 112.636  75.829  1.00 52.37      K000 C  
ANISOU 2260  CA  CYS A  14     9411   5032   5454     87   -966    212  K000 C  
ATOM   2261  C   CYS A  14     -25.661 113.951  75.203  1.00 51.10      K000 C  
ANISOU 2261  C   CYS A  14     9241   5107   5067   -189   -709    288  K000 C  
ATOM   2262  O   CYS A  14     -26.606 114.595  75.671  1.00 53.54      K000 O  
ANISOU 2262  O   CYS A  14     9748   5410   5183   -359   -645    347  K000 O  
ATOM   2263  CB  CYS A  14     -26.075 111.512  75.207  1.00 71.65      K000 C  
ANISOU 2263  CB  CYS A  14    11834   7122   8267    113  -1071    339  K000 C  
ATOM   2264  SG  CYS A  14     -25.634 109.789  75.655  1.00 76.98      K000 S  
ANISOU 2264  SG  CYS A  14    12429   7449   9373    358  -1479    377  K000 S  
ATOM   2265  H   CYS A  14     -26.247 112.996  77.474  1.00 63.32      K000 H  
ATOM   2266  HA  CYS A  14     -24.309 112.478  75.639  1.00 62.84      K000 H  
ATOM   2267  HB2 CYS A  14     -27.001 111.644  75.465  1.00 85.98      K000 H  
ATOM   2268  HB3 CYS A  14     -26.000 111.583  74.242  1.00 85.98      K000 H  
ATOM   2269  N   ALA A  15     -24.885 114.391  74.217  1.00 46.94      K000 N  
ANISOU 2269  N   ALA A  15     8494   4785   4557   -245   -601    297  K000 N  
ATOM   2270  CA  ALA A  15     -25.160 115.583  73.451  1.00 49.47      K000 C  
ANISOU 2270  CA  ALA A  15     8801   5283   4710   -533   -448    391  K000 C  
ATOM   2271  C   ALA A  15     -25.184 115.204  71.983  1.00 54.74      K000 C  
ANISOU 2271  C   ALA A  15     9397   5822   5580   -530   -425    413  K000 C  
ATOM   2272  O   ALA A  15     -24.396 114.358  71.552  1.00 50.69      K000 O  
ANISOU 2272  O   ALA A  15     8679   5282   5300   -320   -464    370  K000 O  
ATOM   2273  CB  ALA A  15     -24.081 116.627  73.671  1.00 62.81      K000 C  
ANISOU 2273  CB  ALA A  15    10275   7400   6189   -591   -342    432  K000 C  
ATOM   2274  H   ALA A  15     -24.164 113.993  73.969  1.00 56.33      K000 H  
ATOM   2275  HA  ALA A  15     -26.021 115.954  73.701  1.00 59.36      K000 H  
ATOM   2276  HB1 ALA A  15     -24.292 117.415  73.146  1.00 75.37      K000 H  
ATOM   2277  HB2 ALA A  15     -24.052 116.855  74.613  1.00 75.37      K000 H  
ATOM   2278  HB3 ALA A  15     -23.228 116.261  73.391  1.00 75.37      K000 H  
ATOM   2279  N   ILE A  16     -26.014 115.890  71.194  1.00 48.52      K000 N  
ANISOU 2279  N   ILE A  16     8798   4958   4679   -750   -378    492  K000 N  
ATOM   2280  CA  ILE A  16     -26.002 115.670  69.741  1.00 52.67      K000 C  
ANISOU 2280  CA  ILE A  16     9320   5379   5313   -697   -341    517  K000 C  
ATOM   2281  C   ILE A  16     -24.892 116.496  69.128  1.00 50.06      K000 C  
ANISOU 2281  C   ILE A  16     8749   5362   4911   -833   -309    512  K000 C  
ATOM   2282  O   ILE A  16     -24.799 117.701  69.376  1.00 56.06      K000 O  
ANISOU 2282  O   ILE A  16     9506   6334   5460  -1121   -323    581  K000 O  
ATOM   2283  CB  ILE A  16     -27.358 116.049  69.117  1.00 61.75      K000 C  
ANISOU 2283  CB  ILE A  16    10892   6262   6310   -812   -346    588  K000 C  
ATOM   2284  CG1 ILE A  16     -28.441 115.054  69.551  1.00 71.39      K000 C  
ANISOU 2284  CG1 ILE A  16    12313   7175   7636   -599   -337    636  K000 C  
ATOM   2285  CG2 ILE A  16     -27.244 116.117  67.605  1.00 58.87      K000 C  
ANISOU 2285  CG2 ILE A  16    10599   5828   5941   -747   -314    611  K000 C  
ATOM   2286  CD1 ILE A  16     -28.221 113.651  69.024  1.00 77.73      K000 C  
ANISOU 2286  CD1 ILE A  16    12916   7849   8770   -235   -291    712  K000 C  
ATOM   2287  H   ILE A  16     -26.582 116.477  71.465  1.00 58.22      K000 H  
ATOM   2288  HA  ILE A  16     -25.828 114.733  69.556  1.00 63.20      K000 H  
ATOM   2289  HB  ILE A  16     -27.605 116.929  69.443  1.00 74.11      K000 H  
ATOM   2290 HG12 ILE A  16     -28.455 115.009  70.520  1.00 85.67      K000 H  
ATOM   2291 HG13 ILE A  16     -29.300 115.363  69.223  1.00 85.67      K000 H  
ATOM   2292 HG21 ILE A  16     -28.107 116.357  67.234  1.00 70.65      K000 H  
ATOM   2293 HG22 ILE A  16     -26.584 116.786  67.367  1.00 70.65      K000 H  
ATOM   2294 HG23 ILE A  16     -26.970 115.248  67.270  1.00 70.65      K000 H  
ATOM   2295 HD11 ILE A  16     -28.941 113.081  69.337  1.00 93.28      K000 H  
ATOM   2296 HD12 ILE A  16     -28.215 113.676  68.054  1.00 93.28      K000 H  
ATOM   2297 HD13 ILE A  16     -27.370 113.321  69.352  1.00 93.28      K000 H  
ATOM   2298  N   ILE A  17     -24.085 115.888  68.283  1.00 48.12      K000 N  
ANISOU 2298  N   ILE A  17     8281   5147   4855   -641   -273    481  K000 N  
ATOM   2299  CA  ILE A  17     -23.112 116.663  67.550  1.00 50.77      K000 C  
ANISOU 2299  CA  ILE A  17     8406   5759   5125   -766   -242    491  K000 C  
ATOM   2300  C   ILE A  17     -23.145 116.405  65.997  1.00 49.66      K000 C  
ANISOU 2300  C   ILE A  17     8322   5482   5063   -670   -215    506  K000 C  
ATOM   2301  O   ILE A  17     -23.591 115.338  65.582  1.00 52.49      K000 O  
ANISOU 2301  O   ILE A  17     8751   5592   5599   -393   -174    527  K000 O  
ATOM   2302  CB  ILE A  17     -21.712 116.357  68.046  1.00 56.01      K000 C  
ANISOU 2302  CB  ILE A  17     8699   6693   5888   -596   -207    430  K000 C  
ATOM   2303  CG1 ILE A  17     -21.349 114.911  67.715  1.00 52.91      K000 C  
ANISOU 2303  CG1 ILE A  17     8180   6107   5817   -263   -233    373  K000 C  
ATOM   2304  CG2 ILE A  17     -21.558 116.582  69.569  1.00 64.36      K000 C  
ANISOU 2304  CG2 ILE A  17     9751   7896   6807   -578   -216    416  K000 C  
ATOM   2305  CD1 ILE A  17     -19.926 114.581  68.068  1.00 57.52      K000 C  
ANISOU 2305  CD1 ILE A  17     8470   6894   6491    -80   -252    296  K000 C  
ATOM   2306  H   ILE A  17     -24.080 115.043  68.118  1.00 57.74      K000 H  
ATOM   2307  HA  ILE A  17     -23.284 117.605  67.700  1.00 60.92      K000 H  
ATOM   2308  HB  ILE A  17     -21.090 116.941  67.586  1.00 67.21      K000 H  
ATOM   2309 HG12 ILE A  17     -21.929 114.316  68.215  1.00 63.49      K000 H  
ATOM   2310 HG13 ILE A  17     -21.464 114.766  66.763  1.00 63.49      K000 H  
ATOM   2311 HG21 ILE A  17     -20.648 116.372  69.829  1.00 77.23      K000 H  
ATOM   2312 HG22 ILE A  17     -21.755 117.511  69.771  1.00 77.23      K000 H  
ATOM   2313 HG23 ILE A  17     -22.179 116.003  70.038  1.00 77.23      K000 H  
ATOM   2314 HD11 ILE A  17     -19.751 113.655  67.838  1.00 69.02      K000 H  
ATOM   2315 HD12 ILE A  17     -19.333 115.165  67.569  1.00 69.02      K000 H  
ATOM   2316 HD13 ILE A  17     -19.798 114.715  69.020  1.00 69.02      K000 H  
HETATM 2317  N   SAR A  18     -22.627 117.370  65.205  1.00 57.11      K000 N  
ANISOU 2317  N   SAR A  18     9210   6609   5878   -876   -241    537  K000 N  
HETATM 2318  CA  SAR A  18     -22.398 117.232  63.737  1.00 53.26      K000 C  
ANISOU 2318  CA  SAR A  18     8760   6050   5426   -762   -222    539  K000 C  
HETATM 2319  C   SAR A  18     -21.056 116.895  63.534  1.00 56.04      K000 C  
ANISOU 2319  C   SAR A  18     8682   6659   5951   -624   -145    506  K000 C  
HETATM 2320  O   SAR A  18     -20.123 117.358  64.142  1.00 58.06      K000 O  
ANISOU 2320  O   SAR A  18     8641   7229   6191   -726   -132    505  K000 O  
HETATM 2321  CN  SAR A  18     -22.203 118.692  65.693  1.00 54.96      K000 C  
ANISOU 2321  CN  SAR A  18     8812   6647   5424  -1229   -299    625  K000 C  
HETATM 2322  HN1 SAR A  18     -22.776 119.388  65.297  1.00 65.95      K000 H  
HETATM 2323  HN2 SAR A  18     -21.267 118.851  65.435  1.00 65.95      K000 H  
HETATM 2324  HN3 SAR A  18     -22.282 118.721  66.667  1.00 65.95      K000 H  
HETATM 2325  HA2 SAR A  18     -23.029 116.761  63.175  1.00 63.91      K000 H  
HETATM 2326  HA3 SAR A  18     -22.445 118.196  63.525  1.00 63.91      K000 H  
ATOM   2327  N   LEU A  19     -20.831 115.937  62.669  1.00 48.33      K000 N  
ANISOU 2327  N   LEU A  19     7627   5566   5170   -314    -65    503  K000 N  
ATOM   2328  CA  LEU A  19     -19.485 115.679  62.227  1.00 44.22      K000 C  
ANISOU 2328  CA  LEU A  19     6710   5280   4811   -191     -6    478  K000 C  
ATOM   2329  C   LEU A  19     -19.424 116.059  60.750  1.00 59.49      K000 C  
ANISOU 2329  C   LEU A  19     8756   7195   6654   -181      9    510  K000 C  
ATOM   2330  O   LEU A  19     -20.134 115.478  59.909  1.00 49.82      K000 O  
ANISOU 2330  O   LEU A  19     7777   5708   5445     63     64    563  K000 O  
ATOM   2331  CB  LEU A  19     -19.144 114.250  62.393  1.00 46.82      K000 C  
ANISOU 2331  CB  LEU A  19     6816   5495   5477    150     37    491  K000 C  
ATOM   2332  CG  LEU A  19     -19.116 113.790  63.869  1.00 55.92      K000 C  
ANISOU 2332  CG  LEU A  19     7911   6620   6717    169    -50    442  K000 C  
ATOM   2333  CD1 LEU A  19     -19.093 112.290  63.893  1.00 70.78      K000 C  
ANISOU 2333  CD1 LEU A  19     9649   8267   8975    467   -100    525  K000 C  
ATOM   2334  CD2 LEU A  19     -17.856 114.375  64.543  1.00 65.43      K000 C  
ANISOU 2334  CD2 LEU A  19     8875   8161   7823     97    -63    349  K000 C  
ATOM   2335  H   LEU A  19     -21.431 115.426  62.326  1.00 58.00      K000 H  
ATOM   2336  HA  LEU A  19     -18.855 116.221  62.726  1.00 53.06      K000 H  
ATOM   2337  HB2 LEU A  19     -19.804 113.715  61.927  1.00 56.18      K000 H  
ATOM   2338  HB3 LEU A  19     -18.265 114.093  62.016  1.00 56.18      K000 H  
ATOM   2339  HG  LEU A  19     -19.905 114.107  64.335  1.00 67.11      K000 H  
ATOM   2340 HD11 LEU A  19     -19.076 111.988  64.815  1.00 84.93      K000 H  
ATOM   2341 HD12 LEU A  19     -19.889 111.955  63.450  1.00 84.93      K000 H  
ATOM   2342 HD13 LEU A  19     -18.301 111.979  63.428  1.00 84.93      K000 H  
ATOM   2343 HD21 LEU A  19     -17.833 114.090  65.470  1.00 78.51      K000 H  
ATOM   2344 HD22 LEU A  19     -17.070 114.051  64.077  1.00 78.51      K000 H  
ATOM   2345 HD23 LEU A  19     -17.894 115.343  64.495  1.00 78.51      K000 H  
ATOM   2346  N   MET A  20     -18.584 117.023  60.434  1.00 48.04      K000 N  
ANISOU 2346  N   MET A  20     7137   6024   5091   -409    -36    508  K000 N  
ATOM   2347  CA  MET A  20     -18.636 117.665  59.125  1.00 58.06      K000 C  
ANISOU 2347  CA  MET A  20     8607   7252   6202   -493   -111    536  K000 C  
ATOM   2348  C   MET A  20     -17.520 117.117  58.269  1.00 53.81      K000 C  
ANISOU 2348  C   MET A  20     7734   6868   5843   -242      9    524  K000 C  
ATOM   2349  O   MET A  20     -16.379 117.040  58.735  1.00 58.89      K000 O  
ANISOU 2349  O   MET A  20     7945   7805   6627   -237     73    506  K000 O  
ATOM   2350  CB  MET A  20     -18.505 119.173  59.260  1.00 58.56      K000 C  
ANISOU 2350  CB  MET A  20     8698   7506   6047   -968   -302    613  K000 C  
ATOM   2351  CG  MET A  20     -18.240 119.841  57.915  1.00 81.62      K000 C  
ANISOU 2351  CG  MET A  20    11753  10417   8840  -1079   -444    648  K000 C  
ATOM   2352  SD  MET A  20     -18.808 121.555  57.997  1.00 86.88      K000 S  
ANISOU 2352  SD  MET A  20    12707  11061   9244  -1697   -825    813  K000 S  
ATOM   2353  CE  MET A  20     -18.391 121.980  59.706  1.00 91.33      K000 C  
ANISOU 2353  CE  MET A  20    12792  12015   9893  -1923   -720    951  K000 C  
ATOM   2354  H   MET A  20     -17.973 117.331  60.955  1.00 57.65      K000 H  
ATOM   2355  HA  MET A  20     -19.489 117.470  58.705  1.00 69.67      K000 H  
ATOM   2356  HB2 MET A  20     -19.330 119.534  59.620  1.00 70.28      K000 H  
ATOM   2357  HB3 MET A  20     -17.763 119.377  59.850  1.00 70.28      K000 H  
ATOM   2358  HG2 MET A  20     -17.289 119.835  57.727  1.00 97.94      K000 H  
ATOM   2359  HG3 MET A  20     -18.733 119.380  57.217  1.00 97.94      K000 H  
ATOM   2360  HE1 MET A  20     -18.654 122.897  59.876  1.00109.59      K000 H  
ATOM   2361  HE2 MET A  20     -18.868 121.382  60.304  1.00109.59      K000 H  
ATOM   2362  HE3 MET A  20     -17.435 121.880  59.831  1.00109.59      K000 H  
ATOM   2363  N   VAL A  21     -17.853 116.708  57.040  1.00 49.95      K000 N  
ANISOU 2363  N   VAL A  21     7474   6175   5330     13     52    545  K000 N  
ATOM   2364  CA  VAL A  21     -16.825 116.319  56.033  1.00 44.67      K000 C  
ANISOU 2364  CA  VAL A  21     6521   5654   4800    241    159    557  K000 C  
ATOM   2365  C   VAL A  21     -17.102 117.123  54.747  1.00 45.49      K000 C  
ANISOU 2365  C   VAL A  21     7016   5654   4616    179     34    562  K000 C  
ATOM   2366  O   VAL A  21     -17.906 116.720  53.922  1.00 50.64      K000 O  
ANISOU 2366  O   VAL A  21     8081   6017   5145    484     76    595  K000 O  
ATOM   2367  CB  VAL A  21     -16.871 114.815  55.720  1.00 53.58      K000 C  
ANISOU 2367  CB  VAL A  21     7503   6633   6221    723    356    641  K000 C  
ATOM   2368  CG1 VAL A  21     -15.749 114.446  54.689  1.00 67.82      K000 C  
ANISOU 2368  CG1 VAL A  21     8981   8606   8180    947    466    676  K000 C  
ATOM   2369  CG2 VAL A  21     -16.767 113.972  56.993  1.00 71.67      K000 C  
ANISOU 2369  CG2 VAL A  21     9516   8921   8795    766    373    650  K000 C  
ATOM   2370  H   VAL A  21     -18.662 116.644  56.755  1.00 59.94      K000 H  
ATOM   2371  HA  VAL A  21     -15.940 116.545  56.360  1.00 53.61      K000 H  
ATOM   2372  HB  VAL A  21     -17.724 114.612  55.306  1.00 64.29      K000 H  
ATOM   2373 HG11 VAL A  21     -15.791 113.495  54.503  1.00 81.38      K000 H  
ATOM   2374 HG12 VAL A  21     -15.892 114.950  53.873  1.00 81.38      K000 H  
ATOM   2375 HG13 VAL A  21     -14.885 114.670  55.070  1.00 81.38      K000 H  
ATOM   2376 HG21 VAL A  21     -16.801 113.033  56.753  1.00 86.00      K000 H  
ATOM   2377 HG22 VAL A  21     -15.928 114.172  57.436  1.00 86.00      K000 H  
ATOM   2378 HG23 VAL A  21     -17.510 114.192  57.577  1.00 86.00      K000 H  
TER    2379      VAL A  21 
HETATM 2380  N   ORN B   1     -18.339 107.644  74.295  1.00 55.41      K000 N  
ANISOU 2380  N   ORN B   1     9961   4837   6256    863   -730   -654  K000 N  
HETATM 2381  CA  ORN B   1     -18.391 107.056  72.938  1.00 55.78      K000 C  
ANISOU 2381  CA  ORN B   1     9589   4958   6648    563   -743   -532  K000 C  
HETATM 2382  C   ORN B   1     -19.389 107.832  72.105  1.00 58.55      K000 C  
ANISOU 2382  C   ORN B   1    10068   5319   6858    778   -649   -170  K000 C  
HETATM 2383  O   ORN B   1     -20.288 108.548  72.587  1.00 60.99      K000 O  
ANISOU 2383  O   ORN B   1    10718   5668   6788   1193   -595    -68  K000 O  
HETATM 2384  CB  ORN B   1     -18.886 105.569  72.962  1.00 53.76      K000 C  
ANISOU 2384  CB  ORN B   1     8860   5227   6340    515  -1037   -907  K000 C  
HETATM 2385  CG  ORN B   1     -17.860 104.536  73.387  1.00 59.24      K000 C  
ANISOU 2385  CG  ORN B   1     9249   5921   7340    117  -1064  -1357  K000 C  
HETATM 2386  CD  ORN B   1     -16.700 104.349  72.352  1.00 66.32      K000 C  
ANISOU 2386  CD  ORN B   1     9970   6352   8875   -395   -739  -1187  K000 C  
HETATM 2387  NE  ORN B   1     -17.189 103.752  71.090  1.00 58.02      K000 N  
ANISOU 2387  NE  ORN B   1     8585   5442   8017   -528   -718  -1037  K000 N  
HETATM 2388  HA  ORN B   1     -17.397 107.183  72.498  1.00 66.94      K000 H  
HETATM 2389  HB2 ORN B   1     -19.216 105.297  71.950  1.00 64.51      K000 H  
HETATM 2390  HB3 ORN B   1     -19.729 105.504  73.663  1.00 64.51      K000 H  
HETATM 2391  HG2 ORN B   1     -17.433 104.838  74.350  1.00 71.09      K000 H  
HETATM 2392  HG3 ORN B   1     -18.367 103.574  73.516  1.00 71.09      K000 H  
HETATM 2393  HD2 ORN B   1     -16.259 105.327  72.136  1.00 79.58      K000 H  
HETATM 2394  HD3 ORN B   1     -15.953 103.677  72.785  1.00 79.58      K000 H  
HETATM 2395  HE1 ORN B   1     -17.274 102.737  71.095  1.00 69.62      K000 H  
HETATM 2396  H1  ORN B   1     -18.272 108.666  74.292  1.00 66.49      K000 H  
HETATM 2397  H2  ORN B   1     -19.163 107.428  74.861  1.00 66.49      K000 H  
HETATM 2398  H3  ORN B   1     -17.540 107.320  74.846  1.00 66.49      K000 H  
ATOM   2399  N   LEU B   2     -19.240 107.627  70.782  1.00 54.07      K000 N  
ANISOU 2399  N   LEU B   2     9226   4712   6607    486   -579     17  K000 N  
ATOM   2400  CA  LEU B   2     -20.155 108.223  69.787  1.00 46.66      K000 C  
ANISOU 2400  CA  LEU B   2     8333   3824   5572    593   -479    299  K000 C  
ATOM   2401  C   LEU B   2     -21.199 107.195  69.474  1.00 53.41      K000 C  
ANISOU 2401  C   LEU B   2     8898   5110   6286    707   -660    186  K000 C  
ATOM   2402  O   LEU B   2     -20.860 106.002  69.409  1.00 52.68      K000 O  
ANISOU 2402  O   LEU B   2     8433   5201   6384    491   -804    -44  K000 O  
ATOM   2403  CB  LEU B   2     -19.384 108.573  68.521  1.00 54.51      K000 C  
ANISOU 2403  CB  LEU B   2     9195   4601   6916    248   -319    557  K000 C  
ATOM   2404  CG  LEU B   2     -18.209 109.521  68.735  1.00 57.45      K000 C  
ANISOU 2404  CG  LEU B   2     9614   4710   7506    125   -142    645  K000 C  
ATOM   2405  CD1 LEU B   2     -17.478 109.761  67.457  1.00 56.01      K000 C  
ANISOU 2405  CD1 LEU B   2     9047   4618   7616    -99    -34    864  K000 C  
ATOM   2406  CD2 LEU B   2     -18.705 110.868  69.342  1.00 54.77      K000 C  
ANISOU 2406  CD2 LEU B   2     9338   4514   6957    330      3    604  K000 C  
ATOM   2407  H   LEU B   2     -18.646 107.108  70.439  1.00 64.89      K000 H  
ATOM   2408  HA  LEU B   2     -20.578 109.021  70.144  1.00 55.99      K000 H  
ATOM   2409  HB2 LEU B   2     -19.034 107.753  68.136  1.00 65.41      K000 H  
ATOM   2410  HB3 LEU B   2     -19.992 108.995  67.894  1.00 65.41      K000 H  
ATOM   2411  HG  LEU B   2     -17.590 109.119  69.364  1.00 68.94      K000 H  
ATOM   2412 HD11 LEU B   2     -16.739 110.367  67.626  1.00 67.21      K000 H  
ATOM   2413 HD12 LEU B   2     -17.143 108.915  67.121  1.00 67.21      K000 H  
ATOM   2414 HD13 LEU B   2     -18.089 110.155  66.814  1.00 67.21      K000 H  
ATOM   2415 HD21 LEU B   2     -17.944 111.455  69.470  1.00 65.72      K000 H  
ATOM   2416 HD22 LEU B   2     -19.338 111.275  68.731  1.00 65.72      K000 H  
ATOM   2417 HD23 LEU B   2     -19.134 110.691  70.194  1.00 65.72      K000 H  
ATOM   2418  N   VAL B   3     -22.434 107.610  69.274  1.00 51.90      K000 N  
ANISOU 2418  N   VAL B   3     9688   5417   4614   1506   -273   1278  K000 N  
ATOM   2419  CA  VAL B   3     -23.437 106.690  68.808  1.00 57.59      K000 C  
ANISOU 2419  CA  VAL B   3    10158   6434   5289   1572   -470   1356  K000 C  
ATOM   2420  C   VAL B   3     -23.935 107.274  67.509  1.00 54.66      K000 C  
ANISOU 2420  C   VAL B   3     9882   6008   4878   1513   -259   1349  K000 C  
ATOM   2421  O   VAL B   3     -24.502 108.361  67.531  1.00 54.80      K000 O  
ANISOU 2421  O   VAL B   3    10148   5633   5040   1545    355   1242  K000 O  
ATOM   2422  CB  VAL B   3     -24.588 106.509  69.730  1.00 63.25      K000 C  
ANISOU 2422  CB  VAL B   3    11094   6994   5945   1905   -260   1466  K000 C  
ATOM   2423  CG1 VAL B   3     -25.580 105.499  69.033  1.00 64.72      K000 C  
ANISOU 2423  CG1 VAL B   3    10960   7483   6147   1990   -469   1605  K000 C  
ATOM   2424  CG2 VAL B   3     -24.138 106.000  71.116  1.00 69.35      K000 C  
ANISOU 2424  CG2 VAL B   3    11913   7794   6645   1878   -438   1506  K000 C  
ATOM   2425  H   VAL B   3     -22.676 108.434  69.248  1.00 62.28      K000 H  
ATOM   2426  HA  VAL B   3     -23.036 105.825  68.632  1.00 69.11      K000 H  
ATOM   2427  HB  VAL B   3     -25.045 107.357  69.848  1.00 75.90      K000 H  
ATOM   2428 HG11 VAL B   3     -26.345 105.359  69.612  1.00 77.67      K000 H  
ATOM   2429 HG12 VAL B   3     -25.868 105.875  68.187  1.00 77.67      K000 H  
ATOM   2430 HG13 VAL B   3     -25.120 104.659  68.883  1.00 77.67      K000 H  
ATOM   2431 HG21 VAL B   3     -24.918 105.897  71.683  1.00 83.23      K000 H  
ATOM   2432 HG22 VAL B   3     -23.691 105.146  71.008  1.00 83.23      K000 H  
ATOM   2433 HG23 VAL B   3     -23.527 106.645  71.506  1.00 83.23      K000 H  
ATOM   2434  N   PHE B   4     -23.819 106.531  66.419  1.00 51.04      K000 N  
ANISOU 2434  N   PHE B   4     9013   6006   4375   1246   -670   1311  K000 N  
ATOM   2435  CA  PHE B   4     -24.379 106.871  65.115  1.00 54.65      K000 C  
ANISOU 2435  CA  PHE B   4     9153   6599   5011    868   -414   1048  K000 C  
ATOM   2436  C   PHE B   4     -25.702 106.133  64.891  1.00 49.92      K000 C  
ANISOU 2436  C   PHE B   4     8517   6080   4369   1159   -269   1112  K000 C  
ATOM   2437  O   PHE B   4     -26.044 105.182  65.611  1.00 59.99      K000 O  
ANISOU 2437  O   PHE B   4     9867   7443   5483   1602   -552   1417  K000 O  
ATOM   2438  CB  PHE B   4     -23.424 106.522  63.995  1.00 58.08      K000 C  
ANISOU 2438  CB  PHE B   4     9109   7503   5454    294   -920    934  K000 C  
ATOM   2439  CG  PHE B   4     -22.129 107.286  64.051  1.00 50.51      K000 C  
ANISOU 2439  CG  PHE B   4     8068   6460   4664     -1  -1044    910  K000 C  
ATOM   2440  CD1 PHE B   4     -21.072 106.822  64.778  1.00 66.83      K000 C  
ANISOU 2440  CD1 PHE B   4    10191   8539   6664    157  -1462   1099  K000 C  
ATOM   2441  CD2 PHE B   4     -22.004 108.476  63.346  1.00 55.43      K000 C  
ANISOU 2441  CD2 PHE B   4     8544   6979   5538   -463   -710    709  K000 C  
ATOM   2442  CE1 PHE B   4     -19.922 107.516  64.828  1.00 50.00      K000 C  
ANISOU 2442  CE1 PHE B   4     7943   6275   4781    -54  -1497   1097  K000 C  
ATOM   2443  CE2 PHE B   4     -20.836 109.189  63.374  1.00 59.23      K000 C  
ANISOU 2443  CE2 PHE B   4     8849   7391   6264   -713   -822    750  K000 C  
ATOM   2444  CZ  PHE B   4     -19.798 108.706  64.130  1.00 53.48      K000 C  
ANISOU 2444  CZ  PHE B   4     8151   6632   5539   -464  -1188    948  K000 C  
ATOM   2445  H   PHE B   4     -23.396 105.782  66.409  1.00 61.25      K000 H  
ATOM   2446  HA  PHE B   4     -24.553 107.825  65.080  1.00 65.57      K000 H  
ATOM   2447  HB2 PHE B   4     -23.215 105.577  64.045  1.00 69.69      K000 H  
ATOM   2448  HB3 PHE B   4     -23.849 106.722  63.147  1.00 69.69      K000 H  
ATOM   2449  HD1 PHE B   4     -21.153 106.029  65.256  1.00 80.20      K000 H  
ATOM   2450  HD2 PHE B   4     -22.722 108.791  62.845  1.00 66.52      K000 H  
ATOM   2451  HE1 PHE B   4     -19.208 107.195  65.329  1.00 60.00      K000 H  
ATOM   2452  HE2 PHE B   4     -20.753 109.988  62.907  1.00 71.07      K000 H  
ATOM   2453  HZ  PHE B   4     -18.996 109.174  64.162  1.00 64.18      K000 H  
ATOM   2454  N   PHE B   5     -26.466 106.620  63.924  1.00 54.35      K000 N  
ANISOU 2454  N   PHE B   5     8976   6579   5096    895    216    837  K000 N  
ATOM   2455  CA  PHE B   5     -27.786 106.064  63.710  1.00 54.78      K000 C  
ANISOU 2455  CA  PHE B   5     9004   6590   5220   1212    531    874  K000 C  
ATOM   2456  C   PHE B   5     -28.012 105.693  62.264  1.00 57.93      K000 C  
ANISOU 2456  C   PHE B   5     9029   7340   5641    711    569    584  K000 C  
ATOM   2457  O   PHE B   5     -27.523 106.336  61.318  1.00 52.85      K000 O  
ANISOU 2457  O   PHE B   5     8282   6807   4990     46    633    274  K000 O  
ATOM   2458  CB  PHE B   5     -28.867 106.991  64.193  1.00 64.06      K000 C  
ANISOU 2458  CB  PHE B   5    10595   7152   6591   1544   1321    843  K000 C  
ATOM   2459  CG  PHE B   5     -28.755 107.301  65.621  1.00 62.55      K000 C  
ANISOU 2459  CG  PHE B   5    10817   6616   6332   2017   1312   1144  K000 C  
ATOM   2460  CD1 PHE B   5     -27.919 108.310  66.038  1.00 76.73      K000 C  
ANISOU 2460  CD1 PHE B   5    12843   8197   8112   1798   1404   1041  K000 C  
ATOM   2461  CD2 PHE B   5     -29.465 106.560  66.583  1.00 76.11      K000 C  
ANISOU 2461  CD2 PHE B   5    12685   8238   7996   2660   1195   1569  K000 C  
ATOM   2462  CE1 PHE B   5     -27.792 108.610  67.372  1.00 82.75      K000 C  
ANISOU 2462  CE1 PHE B   5    14044   8625   8773   2184   1457   1287  K000 C  
ATOM   2463  CE2 PHE B   5     -29.335 106.858  67.929  1.00 75.53      K000 C  
ANISOU 2463  CE2 PHE B   5    13069   7853   7775   3011   1171   1856  K000 C  
ATOM   2464  CZ  PHE B   5     -28.492 107.884  68.319  1.00 77.90      K000 C  
ANISOU 2464  CZ  PHE B   5    13630   7935   8033   2743   1327   1664  K000 C  
ATOM   2465  H   PHE B   5     -26.248 107.258  63.390  1.00 65.22      K000 H  
ATOM   2466  HA  PHE B   5     -27.858 105.247  64.229  1.00 65.73      K000 H  
ATOM   2467  HB2 PHE B   5     -28.810 107.826  63.701  1.00 76.87      K000 H  
ATOM   2468  HB3 PHE B   5     -29.730 106.576  64.043  1.00 76.87      K000 H  
ATOM   2469  HD1 PHE B   5     -27.443 108.803  65.408  1.00 92.07      K000 H  
ATOM   2470  HD2 PHE B   5     -30.028 105.870  66.314  1.00 91.34      K000 H  
ATOM   2471  HE1 PHE B   5     -27.227 109.299  67.641  1.00 99.30      K000 H  
ATOM   2472  HE2 PHE B   5     -29.808 106.372  68.565  1.00 90.63      K000 H  
ATOM   2473  HZ  PHE B   5     -28.404 108.091  69.221  1.00 93.48      K000 H  
ATOM   2474  N   ALA B   6     -28.743 104.612  62.105  1.00 52.10      K000 N  
ANISOU 2474  N   ALA B   6     8073   6803   4918   1004    504    719  K000 N  
ATOM   2475  CA  ALA B   6     -29.070 104.097  60.796  1.00 53.13      K000 C  
ANISOU 2475  CA  ALA B   6     7869   7262   5055    577    601    454  K000 C  
ATOM   2476  C   ALA B   6     -30.459 103.494  60.831  1.00 57.80      K000 C  
ANISOU 2476  C   ALA B   6     8390   7688   5885   1102   1078    558  K000 C  
ATOM   2477  O   ALA B   6     -30.913 103.014  61.875  1.00 59.62      K000 O  
ANISOU 2477  O   ALA B   6     8660   7786   6207   1792    962    979  K000 O  
ATOM   2478  CB  ALA B   6     -28.091 103.027  60.348  1.00 49.95      K000 C  
ANISOU 2478  CB  ALA B   6     7064   7506   4409    248   -225    541  K000 C  
ATOM   2479  H   ALA B   6     -29.067 104.148  62.753  1.00 62.52      K000 H  
ATOM   2480  HA  ALA B   6     -29.061 104.820  60.148  1.00 63.76      K000 H  
ATOM   2481  HB1 ALA B   6     -28.349 102.712  59.468  1.00 59.94      K000 H  
ATOM   2482  HB2 ALA B   6     -27.200 103.408  60.316  1.00 59.94      K000 H  
ATOM   2483  HB3 ALA B   6     -28.114 102.293  60.982  1.00 59.94      K000 H  
ATOM   2484  N   GLU B   7     -31.121 103.535  59.683  1.00 58.44      K000 N  
ANISOU 2484  N   GLU B   7     8370   7764   6072    744   1627    191  K000 N  
ATOM   2485  CA  GLU B   7     -32.333 102.794  59.435  1.00 63.34      K000 C  
ANISOU 2485  CA  GLU B   7     8789   8304   6972   1149   2093    243  K000 C  
ATOM   2486  C   GLU B   7     -31.916 101.426  58.910  1.00 62.09      K000 C  
ANISOU 2486  C   GLU B   7     8103   8827   6663    973   1471    345  K000 C  
ATOM   2487  O   GLU B   7     -31.258 101.330  57.869  1.00 60.05      K000 O  
ANISOU 2487  O   GLU B   7     7705   8960   6151    225   1261     28  K000 O  
ATOM   2488  CB  GLU B   7     -33.198 103.534  58.410  1.00 67.49      K000 C  
ANISOU 2488  CB  GLU B   7     9532   8452   7661    765   3083   -273  K000 C  
ATOM   2489  CG  GLU B   7     -34.640 103.774  58.775  1.00 94.09      K000 C  
ANISOU 2489  CG  GLU B   7    13103  11163  11485   1421   3985   -208  K000 C  
ATOM   2490  CD  GLU B   7     -35.537 103.834  57.536  1.00111.67      K000 C  
ANISOU 2490  CD  GLU B   7    15360  13190  13880   1049   4907   -710  K000 C  
ATOM   2491  OE1 GLU B   7     -35.000 104.013  56.414  1.00107.93      K000 O  
ANISOU 2491  OE1 GLU B   7    14898  13033  13077    145   4885  -1167  K000 O  
ATOM   2492  OE2 GLU B   7     -36.777 103.670  57.676  1.00110.23      K000 O1-
ANISOU 2492  OE2 GLU B   7    15192  12527  14162   1644   5660   -631  K000 O1-
ATOM   2493  H   GLU B   7     -30.871 104.008  59.009  1.00 70.13      K000 H  
ATOM   2494  HA  GLU B   7     -32.834 102.683  60.258  1.00 76.00      K000 H  
ATOM   2495  HB2 GLU B   7     -32.797 104.403  58.248  1.00 80.99      K000 H  
ATOM   2496  HB3 GLU B   7     -33.193 103.022  57.586  1.00 80.99      K000 H  
ATOM   2497  HG2 GLU B   7     -34.951 103.049  59.339  1.00112.91      K000 H  
ATOM   2498  HG3 GLU B   7     -34.715 104.620  59.244  1.00112.91      K000 H  
ATOM   2499  N   ASP B   8     -32.264 100.379  59.627  1.00 63.62      K000 N  
ANISOU 2499  N   ASP B   8     8005   9183   6986   1607   1135    816  K000 N  
ATOM   2500  CA  ASP B   8     -31.966  99.012  59.216  1.00 63.16      K000 C  
ANISOU 2500  CA  ASP B   8     7419   9768   6811   1484    560    961  K000 C  
ATOM   2501  C   ASP B   8     -33.188  98.417  58.523  1.00 72.52      K000 C  
ANISOU 2501  C   ASP B   8     8269  10906   8380   1685   1241    873  K000 C  
ATOM   2502  O   ASP B   8     -34.233  98.216  59.158  1.00 74.00      K000 O  
ANISOU 2502  O   ASP B   8     8365  10761   8989   2431   1614   1210  K000 O  
ATOM   2503  CB  ASP B   8     -31.565  98.160  60.418  1.00 64.27      K000 C  
ANISOU 2503  CB  ASP B   8     7414  10172   6836   1976   -272   1558  K000 C  
ATOM   2504  CG  ASP B   8     -30.942  96.833  60.014  1.00 78.15      K000 C  
ANISOU 2504  CG  ASP B   8     8689  12644   8360   1685  -1011   1683  K000 C  
ATOM   2505  OD1 ASP B   8     -31.012  96.494  58.818  1.00 85.91      K000 O  
ANISOU 2505  OD1 ASP B   8     9402  13900   9340   1206   -801   1345  K000 O  
ATOM   2506  OD2 ASP B   8     -30.383  96.128  60.889  1.00 87.05      K000 O1-
ANISOU 2506  OD2 ASP B   8     9747  14054   9274   1886  -1783   2107  K000 O1-
ATOM   2507  H   ASP B   8     -32.685 100.430  60.375  1.00 76.35      K000 H  
ATOM   2508  HA  ASP B   8     -31.228  99.018  58.586  1.00 75.79      K000 H  
ATOM   2509  HB2 ASP B   8     -30.916  98.647  60.950  1.00 77.13      K000 H  
ATOM   2510  HB3 ASP B   8     -32.355  97.971  60.949  1.00 77.13      K000 H  
ATOM   2511  N   CYS B   9     -33.035  98.088  57.243  1.00 82.80      K000 N  
ANISOU 2511  N   CYS B   9     9368  12544   9548   1021   1387    459  K000 N  
ATOM   2512  CA  CYS B   9     -34.151  97.759  56.361  1.00 90.98      K000 C  
ANISOU 2512  CA  CYS B   9    10193  13447  10928   1034   2259    195  K000 C  
ATOM   2513  C   CYS B   9     -34.023  96.313  55.914  1.00 87.67      K000 C  
ANISOU 2513  C   CYS B   9     9157  13680  10475    942   1828    349  K000 C  
ATOM   2514  O   CYS B   9     -33.046  95.951  55.252  1.00 92.13      K000 O  
ANISOU 2514  O   CYS B   9     9627  14782  10596    228   1259    169  K000 O  
ATOM   2515  CB  CYS B   9     -34.173  98.689  55.138  1.00 86.91      K000 C  
ANISOU 2515  CB  CYS B   9    10063  12730  10230    195   2951   -501  K000 C  
ATOM   2516  SG  CYS B   9     -33.880 100.472  55.527  1.00 89.64      K000 S  
ANISOU 2516  SG  CYS B   9    11128  12490  10442    -16   3206   -721  K000 S  
ATOM   2517  H   CYS B   9     -32.271  98.046  56.851  1.00 99.36      K000 H  
ATOM   2518  HA  CYS B   9     -34.987  97.861  56.842  1.00109.17      K000 H  
ATOM   2519  HB2 CYS B   9     -33.481  98.406  54.520  1.00104.29      K000 H  
ATOM   2520  HB3 CYS B   9     -35.041  98.620  54.711  1.00104.29      K000 H  
ATOM   2521  HG  CYS B   9     -32.802 100.589  56.041  1.00107.57      K000 H  
ATOM   2522  N   GLY B  10     -35.004  95.499  56.267  1.00109.13      K000 N  
ANISOU 2522  N   GLY B  10    11433  16347  13684   1652   2095    712  K000 N  
ATOM   2523  CA  GLY B  10     -35.121  94.146  55.773  1.00 97.20      K000 C  
ANISOU 2523  CA  GLY B  10     9275  15398  12261   1601   1893    841  K000 C  
ATOM   2524  C   GLY B  10     -36.165  94.058  54.685  1.00112.28      K000 C  
ANISOU 2524  C   GLY B  10    11037  17068  14555   1487   3032    408  K000 C  
ATOM   2525  O   GLY B  10     -36.471  95.049  54.010  1.00110.43      K000 O  
ANISOU 2525  O   GLY B  10    11297  16372  14291   1097   3853   -149  K000 O  
ATOM   2526  H   GLY B  10     -35.633  95.718  56.811  1.00130.96      K000 H  
ATOM   2527  HA2 GLY B  10     -34.270  93.853  55.413  1.00116.65      K000 H  
ATOM   2528  HA3 GLY B  10     -35.375  93.552  56.497  1.00116.65      K000 H  
ATOM   2529  N   SER B  11     -36.737  92.859  54.520  1.00118.90      K000 N  
ANISOU 2529  N   SER B  11    11195  18211  15769   1810   3125    666  K000 N  
ATOM   2530  CA  SER B  11     -37.712  92.655  53.453  1.00130.78      K000 C  
ANISOU 2530  CA  SER B  11    12517  19500  17675   1695   4278    238  K000 C  
ATOM   2531  C   SER B  11     -38.847  93.667  53.545  1.00140.98      K000 C  
ANISOU 2531  C   SER B  11    14211  19866  19488   2162   5461     40  K000 C  
ATOM   2532  O   SER B  11     -39.283  94.222  52.528  1.00144.36      K000 O  
ANISOU 2532  O   SER B  11    15005  19930  19916   1662   6476   -625  K000 O  
ATOM   2533  CB  SER B  11     -38.271  91.236  53.512  1.00126.09      K000 C  
ANISOU 2533  CB  SER B  11    11037  19297  17575   2188   4228    687  K000 C  
ATOM   2534  OG  SER B  11     -39.041  91.047  54.688  1.00134.31      K000 O  
ANISOU 2534  OG  SER B  11    11743  20042  19247   3262   4175   1404  K000 O  
ATOM   2535  H   SER B  11     -36.579  92.165  55.002  1.00142.68      K000 H  
ATOM   2536  HA  SER B  11     -37.273  92.771  52.595  1.00156.94      K000 H  
ATOM   2537  HB2 SER B  11     -38.837  91.087  52.738  1.00151.31      K000 H  
ATOM   2538  HB3 SER B  11     -37.535  90.605  53.512  1.00151.31      K000 H  
ATOM   2539  HG  SER B  11     -39.344  90.264  54.711  1.00161.18      K000 H  
ATOM   2540  N   ASN B  12     -39.344  93.913  54.754  1.00141.14      K000 N  
ANISOU 2540  N   ASN B  12    14213  19483  19932   3077   5359    615  K000 N  
ATOM   2541  CA  ASN B  12     -40.456  94.829  54.950  1.00137.04      K000 C  
ANISOU 2541  CA  ASN B  12    14066  18041  19960   3605   6452    517  K000 C  
ATOM   2542  C   ASN B  12     -40.116  95.818  56.060  1.00137.35      K000 C  
ANISOU 2542  C   ASN B  12    14650  17740  19799   3883   5992    787  K000 C  
ATOM   2543  O   ASN B  12     -40.182  97.034  55.848  1.00135.29      K000 O  
ANISOU 2543  O   ASN B  12    15081  16938  19387   3572   6565    328  K000 O  
ATOM   2544  CB  ASN B  12     -41.728  94.043  55.274  1.00149.99      K000 C  
ANISOU 2544  CB  ASN B  12    15035  19410  22545   4593   7034   1030  K000 C  
ATOM   2545  CG  ASN B  12     -41.962  92.869  54.311  1.00151.83      K000 C  
ANISOU 2545  CG  ASN B  12    14581  20105  23001   4371   7346    874  K000 C  
ATOM   2546  ND2 ASN B  12     -42.668  91.843  54.782  1.00151.60      K000 N  
ANISOU 2546  ND2 ASN B  12    13827  20184  23589   5081   7143   1505  K000 N  
ATOM   2547  OD1 ASN B  12     -41.513  92.892  53.163  1.00153.44      K000 O  
ANISOU 2547  OD1 ASN B  12    14999  20565  22735   3445   7607    183  K000 O  
ATOM   2548  H   ASN B  12     -39.050  93.557  55.480  1.00169.37      K000 H  
ATOM   2549  HA  ASN B  12     -40.606  95.328  54.133  1.00164.44      K000 H  
ATOM   2550  HB2 ASN B  12     -41.658  93.684  56.172  1.00179.99      K000 H  
ATOM   2551  HB3 ASN B  12     -42.492  94.638  55.212  1.00179.99      K000 H  
ATOM   2552 HD21 ASN B  12     -42.826  91.162  54.280  1.00181.92      K000 H  
ATOM   2553 HD22 ASN B  12     -42.966  91.860  55.588  1.00181.92      K000 H  
ATOM   2554  N   LYS B  13     -39.704  95.310  57.224  1.00133.42      K000 N  
ANISOU 2554  N   LYS B  13    13875  17581  19239   4377   4949   1510  K000 N  
ATOM   2555  CA  LYS B  13     -39.550  96.149  58.411  1.00126.62      K000 C  
ANISOU 2555  CA  LYS B  13    13495  16343  18271   4764   4601   1853  K000 C  
ATOM   2556  C   LYS B  13     -38.353  97.087  58.284  1.00116.84      K000 C  
ANISOU 2556  C   LYS B  13    12890  15212  16292   3976   4175   1403  K000 C  
ATOM   2557  O   LYS B  13     -37.308  96.726  57.734  1.00100.09      K000 O  
ANISOU 2557  O   LYS B  13    10676  13707  13644   3270   3548   1162  K000 O  
ATOM   2558  CB  LYS B  13     -39.358  95.301  59.670  1.00124.56      K000 C  
ANISOU 2558  CB  LYS B  13    12821  16470  18037   5372   3560   2730  K000 C  
ATOM   2559  CG  LYS B  13     -40.182  94.032  59.775  1.00144.54      K000 C  
ANISOU 2559  CG  LYS B  13    14492  19241  21186   5996   3554   3308  K000 C  
ATOM   2560  CD  LYS B  13     -39.535  93.116  60.801  1.00139.99      K000 C  
ANISOU 2560  CD  LYS B  13    13566  19320  20305   6168   2238   4040  K000 C  
ATOM   2561  CE  LYS B  13     -40.524  92.146  61.439  1.00150.00      K000 C  
ANISOU 2561  CE  LYS B  13    14371  20563  22060   6601   2026   4640  K000 C  
ATOM   2562  NZ  LYS B  13     -40.021  91.695  62.774  1.00145.61      K000 N1+
ANISOU 2562  NZ  LYS B  13    14053  20271  21003   6407    843   5066  K000 N1+
ATOM   2563  H   LYS B  13     -39.509  94.483  57.351  1.00160.11      K000 H  
ATOM   2564  HA  LYS B  13     -40.347  96.688  58.526  1.00151.94      K000 H  
ATOM   2565  HB2 LYS B  13     -38.426  95.041  59.719  1.00149.47      K000 H  
ATOM   2566  HB3 LYS B  13     -39.579  95.849  60.439  1.00149.47      K000 H  
ATOM   2567  HG2 LYS B  13     -41.082  94.246  60.070  1.00173.45      K000 H  
ATOM   2568  HG3 LYS B  13     -40.201  93.578  58.917  1.00173.45      K000 H  
ATOM   2569  HD2 LYS B  13     -38.842  92.593  60.366  1.00167.99      K000 H  
ATOM   2570  HD3 LYS B  13     -39.148  93.656  61.507  1.00167.99      K000 H  
ATOM   2571  HE2 LYS B  13     -41.377  92.590  61.565  1.00180.00      K000 H  
ATOM   2572  HE3 LYS B  13     -40.627  91.368  60.870  1.00180.00      K000 H  
ATOM   2573  HZ1 LYS B  13     -40.602  91.130  63.142  1.00174.74      K000 H  
ATOM   2574  HZ2 LYS B  13     -39.237  91.285  62.680  1.00174.74      K000 H  
ATOM   2575  HZ3 LYS B  13     -39.919  92.396  63.312  1.00174.74      K000 H  
ATOM   2576  N   CYS B  14     -38.513  98.288  58.836  1.00107.21      K000 N  
ANISOU 2576  N   CYS B  14    11971  15020  13744   2685   1372    534  K000 N  
ATOM   2577  CA  CYS B  14     -37.453  99.282  58.949  1.00 92.70      K000 C  
ANISOU 2577  CA  CYS B  14    10629  12882  11710   2366   1295    628  K000 C  
ATOM   2578  C   CYS B  14     -37.450  99.796  60.381  1.00 86.89      K000 C  
ANISOU 2578  C   CYS B  14    10075  12302  10637   2915    971    675  K000 C  
ATOM   2579  O   CYS B  14     -38.501 100.173  60.905  1.00 82.71      K000 O  
ANISOU 2579  O   CYS B  14     9723  11829   9873   3550   1117    859  K000 O  
ATOM   2580  CB  CYS B  14     -37.668 100.451  57.979  1.00102.66      K000 C  
ANISOU 2580  CB  CYS B  14    12482  13691  12833   2119   1801    874  K000 C  
ATOM   2581  SG  CYS B  14     -37.326 100.138  56.245  1.00105.26      K000 S  
ANISOU 2581  SG  CYS B  14    12784  13814  13398   1402   2161    855  K000 S  
ATOM   2582  H   CYS B  14     -39.259  98.559  59.165  1.00128.65      K000 H  
ATOM   2583  HA  CYS B  14     -36.594  98.871  58.761  1.00111.24      K000 H  
ATOM   2584  HB2 CYS B  14     -38.595 100.729  58.042  1.00123.19      K000 H  
ATOM   2585  HB3 CYS B  14     -37.095 101.184  58.256  1.00123.19      K000 H  
ATOM   2586  HG  CYS B  14     -36.175  99.817  56.126  1.00126.32      K000 H  
ATOM   2587  N   ALA B  15     -36.285  99.808  61.016  1.00 69.55      K000 N  
ANISOU 2587  N   ALA B  15     7866  10151   8409   2703    585    528  K000 N  
ATOM   2588  CA  ALA B  15     -36.178 100.312  62.373  1.00 69.75      K000 C  
ANISOU 2588  CA  ALA B  15     8110  10307   8084   3187    293    560  K000 C  
ATOM   2589  C   ALA B  15     -34.892 101.099  62.489  1.00 72.12      K000 C  
ANISOU 2589  C   ALA B  15     8779  10281   8341   2758    216    577  K000 C  
ATOM   2590  O   ALA B  15     -33.901 100.780  61.842  1.00 71.54      K000 O  
ANISOU 2590  O   ALA B  15     8560  10082   8539   2158    179    460  K000 O  
ATOM   2591  CB  ALA B  15     -36.170  99.202  63.412  1.00 81.45      K000 C  
ANISOU 2591  CB  ALA B  15     9009  12392   9546   3526   -234    239  K000 C  
ATOM   2592  H   ALA B  15     -35.543  99.529  60.681  1.00 83.46      K000 H  
ATOM   2593  HA  ALA B  15     -36.922 100.905  62.559  1.00 83.70      K000 H  
ATOM   2594  HB1 ALA B  15     -36.097  99.596  64.295  1.00 97.74      K000 H  
ATOM   2595  HB2 ALA B  15     -36.996  98.698  63.342  1.00 97.74      K000 H  
ATOM   2596  HB3 ALA B  15     -35.412  98.619  63.246  1.00 97.74      K000 H  
ATOM   2597  N   ILE B  16     -34.897 102.095  63.339  1.00 61.33      K000 N  
ANISOU 2597  N   ILE B  16     7885   8771   6647   3104    225    734  K000 N  
ATOM   2598  CA  ILE B  16     -33.719 102.907  63.535  1.00 60.51      K000 C  
ANISOU 2598  CA  ILE B  16     8121   8357   6512   2753    170    749  K000 C  
ATOM   2599  C   ILE B  16     -32.867 102.241  64.595  1.00 64.36      K000 C  
ANISOU 2599  C   ILE B  16     8333   9140   6982   2781   -330    480  K000 C  
ATOM   2600  O   ILE B  16     -33.383 101.833  65.637  1.00 78.08      K000 O  
ANISOU 2600  O   ILE B  16     9928  11268   8471   3335   -594    385  K000 O  
ATOM   2601  CB  ILE B  16     -34.113 104.335  63.918  1.00 71.29      K000 C  
ANISOU 2601  CB  ILE B  16    10131   9367   7590   3056    508   1001  K000 C  
ATOM   2602  CG1 ILE B  16     -34.751 104.972  62.674  1.00 82.60      K000 C  
ANISOU 2602  CG1 ILE B  16    11780  10486   9118   2822   1038   1149  K000 C  
ATOM   2603  CG2 ILE B  16     -32.885 105.103  64.381  1.00 61.80      K000 C  
ANISOU 2603  CG2 ILE B  16     9212   7912   6357   2784    390    974  K000 C  
ATOM   2604  CD1 ILE B  16     -35.759 106.016  62.978  1.00 91.35      K000 C  
ANISOU 2604  CD1 ILE B  16    13392  11312  10007   3265   1525   1349  K000 C  
ATOM   2605  H   ILE B  16     -35.573 102.324  63.820  1.00 73.60      K000 H  
ATOM   2606  HA  ILE B  16     -33.210 102.941  62.710  1.00 72.61      K000 H  
ATOM   2607  HB  ILE B  16     -34.766 104.306  64.636  1.00 85.55      K000 H  
ATOM   2608 HG12 ILE B  16     -34.052 105.383  62.141  1.00 99.12      K000 H  
ATOM   2609 HG13 ILE B  16     -35.191 104.278  62.159  1.00 99.12      K000 H  
ATOM   2610 HG21 ILE B  16     -33.150 106.005  64.620  1.00 74.16      K000 H  
ATOM   2611 HG22 ILE B  16     -32.505 104.654  65.152  1.00 74.16      K000 H  
ATOM   2612 HG23 ILE B  16     -32.239 105.128  63.659  1.00 74.16      K000 H  
ATOM   2613 HD11 ILE B  16     -36.111 106.366  62.145  1.00109.63      K000 H  
ATOM   2614 HD12 ILE B  16     -36.474 105.621  63.500  1.00109.63      K000 H  
ATOM   2615 HD13 ILE B  16     -35.335 106.727  63.483  1.00109.63      K000 H  
ATOM   2616  N   ILE B  17     -31.578 102.085  64.320  1.00 56.88      K000 N  
ANISOU 2616  N   ILE B  17     7290   8037   6284   2207   -445    345  K000 N  
ATOM   2617  CA  ILE B  17     -30.685 101.420  65.250  1.00 58.61      K000 C  
ANISOU 2617  CA  ILE B  17     7236   8480   6552   2129   -844     27  K000 C  
ATOM   2618  C   ILE B  17     -29.567 102.367  65.628  1.00 62.95      K000 C  
ANISOU 2618  C   ILE B  17     8210   8657   7052   1917   -828    116  K000 C  
ATOM   2619  O   ILE B  17     -29.218 103.234  64.814  1.00 56.80      K000 O  
ANISOU 2619  O   ILE B  17     7746   7481   6354   1627   -542    360  K000 O  
ATOM   2620  CB  ILE B  17     -30.118 100.134  64.674  1.00 60.37      K000 C  
ANISOU 2620  CB  ILE B  17     6877   8844   7218   1635   -929   -285  K000 C  
ATOM   2621  CG1 ILE B  17     -29.402 100.380  63.363  1.00 56.85      K000 C  
ANISOU 2621  CG1 ILE B  17     6567   7962   7073   1058   -598    -90  K000 C  
ATOM   2622  CG2 ILE B  17     -31.230  99.137  64.443  1.00 77.26      K000 C  
ANISOU 2622  CG2 ILE B  17     8520  11401   9435   1873   -968   -442  K000 C  
ATOM   2623  CD1 ILE B  17     -28.565  99.179  62.984  1.00 58.93      K000 C  
ANISOU 2623  CD1 ILE B  17     6357   8242   7791    565   -602   -385  K000 C  
ATOM   2624  H   ILE B  17     -31.199 102.356  63.598  1.00 68.25      K000 H  
ATOM   2625  HA  ILE B  17     -31.176 101.198  66.056  1.00 70.33      K000 H  
ATOM   2626  HB  ILE B  17     -29.487  99.759  65.308  1.00 72.44      K000 H  
ATOM   2627 HG12 ILE B  17     -30.055 100.533  62.662  1.00 68.22      K000 H  
ATOM   2628 HG13 ILE B  17     -28.815 101.147  63.454  1.00 68.22      K000 H  
ATOM   2629 HG21 ILE B  17     -30.852  98.323  64.076  1.00 92.72      K000 H  
ATOM   2630 HG22 ILE B  17     -31.664  98.948  65.289  1.00 92.72      K000 H  
ATOM   2631 HG23 ILE B  17     -31.870  99.516  63.820  1.00 92.72      K000 H  
ATOM   2632 HD11 ILE B  17     -28.117  99.359  62.142  1.00 70.72      K000 H  
ATOM   2633 HD12 ILE B  17     -27.910  99.019  63.680  1.00 70.72      K000 H  
ATOM   2634 HD13 ILE B  17     -29.145  98.407  62.891  1.00 70.72      K000 H  
HETATM 2635  N   SAR B  18     -28.989 102.227  66.832  1.00 56.96      K000 N  
ANISOU 2635  N   SAR B  18     7443   8047   6153   2054  -1128   -103  K000 N  
HETATM 2636  CA  SAR B  18     -27.734 102.917  67.086  1.00 53.95      K000 C  
ANISOU 2636  CA  SAR B  18     7362   7286   5849   1741  -1094    -68  K000 C  
HETATM 2637  C   SAR B  18     -26.626 102.140  66.807  1.00 64.18      K000 C  
ANISOU 2637  C   SAR B  18     8325   8526   7533   1218  -1163   -300  K000 C  
HETATM 2638  O   SAR B  18     -26.673 100.949  66.891  1.00 64.43      K000 O  
ANISOU 2638  O   SAR B  18     7858   8883   7740   1116  -1333   -639  K000 O  
HETATM 2639  CN  SAR B  18     -29.385 101.269  67.903  1.00 62.27      K000 C  
ANISOU 2639  CN  SAR B  18     7729   9300   6630   2441  -1528   -453  K000 C  
HETATM 2640  HN1 SAR B  18     -28.653 100.632  68.061  1.00 74.72      K000 H  
HETATM 2641  HN2 SAR B  18     -30.192 100.779  67.622  1.00 74.72      K000 H  
HETATM 2642  HN3 SAR B  18     -29.574 101.761  68.727  1.00 74.72      K000 H  
HETATM 2643  HA2 SAR B  18     -27.634 103.845  66.836  1.00 64.74      K000 H  
HETATM 2644  HA3 SAR B  18     -27.802 102.877  68.070  1.00 64.74      K000 H  
ATOM   2645  N   LEU B  19     -25.502 102.778  66.500  1.00 50.60      K000 N  
ANISOU 2645  N   LEU B  19     6851   6377   5996    859  -1003   -149  K000 N  
ATOM   2646  CA  LEU B  19     -24.224 102.094  66.304  1.00 59.92      K000 C  
ANISOU 2646  CA  LEU B  19     7787   7394   7588    363   -977   -330  K000 C  
ATOM   2647  C   LEU B  19     -23.141 102.811  67.089  1.00 59.21      K000 C  
ANISOU 2647  C   LEU B  19     8011   7006   7479    303   -987   -319  K000 C  
ATOM   2648  O   LEU B  19     -22.853 103.965  66.810  1.00 52.23      K000 O  
ANISOU 2648  O   LEU B  19     7511   5805   6530    314   -823      5  K000 O  
ATOM   2649  CB  LEU B  19     -23.847 102.062  64.828  1.00 58.52      K000 C  
ANISOU 2649  CB  LEU B  19     7574   6950   7712    -17   -676    -62  K000 C  
ATOM   2650  CG  LEU B  19     -24.922 101.415  63.970  1.00 60.41      K000 C  
ANISOU 2650  CG  LEU B  19     7548   7428   7979     20   -598    -54  K000 C  
ATOM   2651  CD1 LEU B  19     -24.595 101.644  62.538  1.00 70.09      K000 C  
ANISOU 2651  CD1 LEU B  19     8873   8394   9363   -279   -286    271  K000 C  
ATOM   2652  CD2 LEU B  19     -25.020  99.927  64.268  1.00 59.83      K000 C  
ANISOU 2652  CD2 LEU B  19     6909   7654   8168   -103   -717   -506  K000 C  
ATOM   2653  H   LEU B  19     -25.451 103.629  66.397  1.00 60.72      K000 H  
ATOM   2654  HA  LEU B  19     -24.289 101.181  66.627  1.00 71.91      K000 H  
ATOM   2655  HB2 LEU B  19     -23.718 102.970  64.514  1.00 70.23      K000 H  
ATOM   2656  HB3 LEU B  19     -23.028 101.552  64.720  1.00 70.23      K000 H  
ATOM   2657  HG  LEU B  19     -25.781 101.826  64.161  1.00 72.50      K000 H  
ATOM   2658 HD11 LEU B  19     -25.280 101.232  61.988  1.00 84.10      K000 H  
ATOM   2659 HD12 LEU B  19     -24.565 102.599  62.370  1.00 84.10      K000 H  
ATOM   2660 HD13 LEU B  19     -23.732 101.245  62.345  1.00 84.10      K000 H  
ATOM   2661 HD21 LEU B  19     -25.711  99.537  63.709  1.00 71.79      K000 H  
ATOM   2662 HD22 LEU B  19     -24.165  99.509  64.074  1.00 71.79      K000 H  
ATOM   2663 HD23 LEU B  19     -25.243  99.805  65.204  1.00 71.79      K000 H  
ATOM   2664  N   MET B  20     -22.546 102.126  68.062  1.00 54.33      K000 N  
ANISOU 2664  N   MET B  20     7200   6507   6935    219  -1161   -717  K000 N  
ATOM   2665  CA  MET B  20     -21.703 102.771  69.056  1.00 57.73      K000 C  
ANISOU 2665  CA  MET B  20     7947   6714   7273    250  -1188   -766  K000 C  
ATOM   2666  C   MET B  20     -20.252 102.600  68.704  1.00 59.60      K000 C  
ANISOU 2666  C   MET B  20     8138   6527   7981   -242   -953   -767  K000 C  
ATOM   2667  O   MET B  20     -19.831 101.490  68.367  1.00 62.46      K000 O  
ANISOU 2667  O   MET B  20     8108   6910   8714   -592   -869  -1027  K000 O  
ATOM   2668  CB  MET B  20     -21.946 102.180  70.444  1.00 61.12      K000 C  
ANISOU 2668  CB  MET B  20     8236   7571   7415    499  -1517  -1237  K000 C  
ATOM   2669  CG  MET B  20     -21.311 102.983  71.583  1.00 74.60      K000 C  
ANISOU 2669  CG  MET B  20    10372   9077   8896    643  -1533  -1261  K000 C  
ATOM   2670  SD  MET B  20     -22.000 102.482  73.173  1.00 81.59      K000 S  
ANISOU 2670  SD  MET B  20    11195  10616   9190   1154  -1963  -1718  K000 S  
ATOM   2671  CE  MET B  20     -20.748 101.287  73.610  1.00101.47      K000 C  
ANISOU 2671  CE  MET B  20    13249  13191  12114    565  -2025  -2383  K000 C  
ATOM   2672  H   MET B  20     -22.616 101.275  68.167  1.00 65.19      K000 H  
ATOM   2673  HA  MET B  20     -21.915 103.718  69.088  1.00 69.27      K000 H  
ATOM   2674  HB2 MET B  20     -22.903 102.143  70.605  1.00 73.34      K000 H  
ATOM   2675  HB3 MET B  20     -21.575 101.284  70.471  1.00 73.34      K000 H  
ATOM   2676  HG2 MET B  20     -20.355 102.821  71.598  1.00 89.52      K000 H  
ATOM   2677  HG3 MET B  20     -21.493 103.927  71.453  1.00 89.52      K000 H  
ATOM   2678  HE1 MET B  20     -20.968 100.902  74.473  1.00121.76      K000 H  
ATOM   2679  HE2 MET B  20     -20.725 100.593  72.933  1.00121.76      K000 H  
ATOM   2680  HE3 MET B  20     -19.889 101.734  73.656  1.00121.76      K000 H  
ATOM   2681  N   VAL B  21     -19.496 103.704  68.799  1.00 53.05      K000 N  
ANISOU 2681  N   VAL B  21     7702   5291   7162   -250   -798   -483  K000 N  
ATOM   2682  CA  VAL B  21     -18.025 103.703  68.761  1.00 61.14      K000 C  
ANISOU 2682  CA  VAL B  21     8759   5881   8589   -602   -563   -459  K000 C  
ATOM   2683  C   VAL B  21     -17.492 104.497  69.987  1.00 58.84      K000 C  
ANISOU 2683  C   VAL B  21     8815   5404   8135   -457   -596   -542  K000 C  
ATOM   2684  O   VAL B  21     -17.423 105.753  69.966  1.00 54.21      K000 O  
ANISOU 2684  O   VAL B  21     8589   4586   7421   -285   -506   -218  K000 O  
ATOM   2685  CB  VAL B  21     -17.536 104.337  67.475  1.00 58.14      K000 C  
ANISOU 2685  CB  VAL B  21     8488   5190   8414   -730   -304     40  K000 C  
ATOM   2686  CG1 VAL B  21     -16.064 104.008  67.293  1.00 61.82      K000 C  
ANISOU 2686  CG1 VAL B  21     8903   5241   9346  -1057     -9     89  K000 C  
ATOM   2687  CG2 VAL B  21     -18.374 103.860  66.298  1.00 71.07      K000 C  
ANISOU 2687  CG2 VAL B  21     9912   7055  10035   -755   -285    179  K000 C  
ATOM   2688  H   VAL B  21     -19.826 104.492  68.889  1.00 63.66      K000 H  
ATOM   2689  HA  VAL B  21     -17.694 102.793  68.808  1.00 73.37      K000 H  
ATOM   2690  HB  VAL B  21     -17.625 105.301  67.539  1.00 69.77      K000 H  
ATOM   2691 HG11 VAL B  21     -15.750 104.414  66.469  1.00 74.19      K000 H  
ATOM   2692 HG12 VAL B  21     -15.567 104.362  68.047  1.00 74.19      K000 H  
ATOM   2693 HG13 VAL B  21     -15.960 103.045  67.248  1.00 74.19      K000 H  
ATOM   2694 HG21 VAL B  21     -18.045 104.276  65.486  1.00 85.28      K000 H  
ATOM   2695 HG22 VAL B  21     -18.300 102.894  66.229  1.00 85.28      K000 H  
ATOM   2696 HG23 VAL B  21     -19.299 104.109  66.448  1.00 85.28      K000 H  
TER    2697      VAL B  21 
HETATM 2698  N   ORN C   1     -30.622  96.529  53.799  1.00 57.74      K000 N  
ANISOU 2698  N   ORN C   1     6538   7257   8143   1193   1211   -328  K000 N  
HETATM 2699  CA  ORN C   1     -29.436  97.383  53.768  1.00 60.92      K000 C  
ANISOU 2699  CA  ORN C   1     7377   7627   8142   1006    787   -103  K000 C  
HETATM 2700  C   ORN C   1     -29.617  98.387  54.931  1.00 60.71      K000 C  
ANISOU 2700  C   ORN C   1     7347   7483   8239   1470    454      3  K000 C  
HETATM 2701  O   ORN C   1     -30.696  98.501  55.547  1.00 64.76      K000 O  
ANISOU 2701  O   ORN C   1     7632   7908   9067   1869    592    -87  K000 O  
HETATM 2702  CB  ORN C   1     -29.357  98.226  52.476  1.00 63.94      K000 C  
ANISOU 2702  CB  ORN C   1     8293   7942   8060    611   1037   -181  K000 C  
HETATM 2703  CG  ORN C   1     -28.740  97.578  51.272  1.00 69.72      K000 C  
ANISOU 2703  CG  ORN C   1     9268   8771   8452     52   1222   -189  K000 C  
HETATM 2704  CD  ORN C   1     -27.255  97.367  51.409  1.00 58.67      K000 C  
ANISOU 2704  CD  ORN C   1     8039   7407   6844   -177    684     70  K000 C  
HETATM 2705  NE  ORN C   1     -26.515  98.613  51.287  1.00 65.20      K000 N  
ANISOU 2705  NE  ORN C   1     9314   8121   7337   -233    304    174  K000 N  
HETATM 2706  HA  ORN C   1     -28.562  96.756  53.962  1.00 73.10      K000 H  
HETATM 2707  HB2 ORN C   1     -28.760  99.124  52.691  1.00 76.73      K000 H  
HETATM 2708  HB3 ORN C   1     -30.380  98.518  52.203  1.00 76.73      K000 H  
HETATM 2709  HG2 ORN C   1     -29.226  96.610  51.101  1.00 83.66      K000 H  
HETATM 2710  HG3 ORN C   1     -28.920  98.220  50.402  1.00 83.66      K000 H  
HETATM 2711  HD2 ORN C   1     -26.926  96.692  50.613  1.00 70.40      K000 H  
HETATM 2712  HD3 ORN C   1     -27.052  96.931  52.391  1.00 70.40      K000 H  
HETATM 2713  HE1 ORN C   1     -26.356  98.958  50.343  1.00 78.24      K000 H  
HETATM 2714  H1  ORN C   1     -30.844  96.179  54.734  1.00 69.29      K000 H  
HETATM 2715  H2  ORN C   1     -31.471  97.003  53.480  1.00 69.29      K000 H  
HETATM 2716  H3  ORN C   1     -30.539  95.697  53.209  1.00 69.29      K000 H  
ATOM   2717  N   LEU C   2     -28.514  99.143  55.208  1.00 51.38      K000 N  
ANISOU 2717  N   LEU C   2     6439   6293   6789   1398      6    195  K000 N  
ATOM   2718  CA  LEU C   2     -28.581 100.199  56.214  1.00 58.26      K000 C  
ANISOU 2718  CA  LEU C   2     7354   7075   7706   1754   -260    296  K000 C  
ATOM   2719  C   LEU C   2     -28.682 101.517  55.472  1.00 61.29      K000 C  
ANISOU 2719  C   LEU C   2     8161   7327   7799   1561   -121    239  K000 C  
ATOM   2720  O   LEU C   2     -28.026 101.632  54.444  1.00 52.04      K000 O  
ANISOU 2720  O   LEU C   2     7290   6174   6309   1154   -117    215  K000 O  
ATOM   2721  CB  LEU C   2     -27.304 100.264  57.055  1.00 53.42      K000 C  
ANISOU 2721  CB  LEU C   2     6728   6553   7016   1825   -834    495  K000 C  
ATOM   2722  CG  LEU C   2     -26.915  99.053  57.893  1.00 68.69      K000 C  
ANISOU 2722  CG  LEU C   2     8287   8612   9202   2008  -1118    571  K000 C  
ATOM   2723  CD1 LEU C   2     -25.489  99.296  58.443  1.00 64.70      K000 C  
ANISOU 2723  CD1 LEU C   2     7874   8181   8527   1950  -1647    723  K000 C  
ATOM   2724  CD2 LEU C   2     -27.951  98.771  58.982  1.00 75.10      K000 C  
ANISOU 2724  CD2 LEU C   2     8757   9393  10385   2506  -1071    550  K000 C  
ATOM   2725  H   LEU C   2     -27.774  99.112  54.769  1.00 61.65      K000 H  
ATOM   2726  HA  LEU C   2     -29.353 100.082  56.790  1.00 69.91      K000 H  
ATOM   2727  HB2 LEU C   2     -26.562 100.437  56.454  1.00 64.10      K000 H  
ATOM   2728  HB3 LEU C   2     -27.392 101.011  57.668  1.00 64.10      K000 H  
ATOM   2729  HG  LEU C   2     -26.878  98.276  57.314  1.00 82.43      K000 H  
ATOM   2730 HD11 LEU C   2     -25.224  98.532  58.980  1.00 77.64      K000 H  
ATOM   2731 HD12 LEU C   2     -24.877  99.403  57.698  1.00 77.64      K000 H  
ATOM   2732 HD13 LEU C   2     -25.493 100.098  58.987  1.00 77.64      K000 H  
ATOM   2733 HD21 LEU C   2     -27.669  97.996  59.492  1.00 90.12      K000 H  
ATOM   2734 HD22 LEU C   2     -28.015  99.545  59.563  1.00 90.12      K000 H  
ATOM   2735 HD23 LEU C   2     -28.809  98.599  58.564  1.00 90.12      K000 H  
ATOM   2736  N   VAL C   3     -29.363 102.540  55.967  1.00 57.22      K000 N  
ANISOU 2736  N   VAL C   3     9827   6727   5185   2322    692    273  K000 N  
ATOM   2737  CA  VAL C   3     -29.438 103.904  55.449  1.00 62.30      K000 C  
ANISOU 2737  CA  VAL C   3    10837   7120   5714   2323    491    288  K000 C  
ATOM   2738  C   VAL C   3     -28.908 104.876  56.545  1.00 59.30      K000 C  
ANISOU 2738  C   VAL C   3    10330   6922   5279   1954    290    322  K000 C  
ATOM   2739  O   VAL C   3     -29.536 105.038  57.607  1.00 53.84      K000 O  
ANISOU 2739  O   VAL C   3     9532   6360   4565   1825    142    456  K000 O  
ATOM   2740  CB  VAL C   3     -30.840 104.261  55.034  1.00 68.14      K000 C  
ANISOU 2740  CB  VAL C   3    11876   7568   6445   2554    380    421  K000 C  
ATOM   2741  CG1 VAL C   3     -30.853 105.643  54.476  1.00 62.77      K000 C  
ANISOU 2741  CG1 VAL C   3    11583   6625   5641   2472    162    382  K000 C  
ATOM   2742  CG2 VAL C   3     -31.292 103.303  54.004  1.00 65.21      K000 C  
ANISOU 2742  CG2 VAL C   3    11647   6981   6150   2924    668    404  K000 C  
ATOM   2743  H   VAL C   3     -29.754 102.433  56.726  1.00 68.66      K000 H  
ATOM   2744  HA  VAL C   3     -28.863 103.982  54.672  1.00 74.76      K000 H  
ATOM   2745  HB  VAL C   3     -31.439 104.219  55.797  1.00 81.76      K000 H  
ATOM   2746 HG11 VAL C   3     -31.758 105.868  54.210  1.00 75.32      K000 H  
ATOM   2747 HG12 VAL C   3     -30.544 106.261  55.157  1.00 75.32      K000 H  
ATOM   2748 HG13 VAL C   3     -30.263 105.677  53.706  1.00 75.32      K000 H  
ATOM   2749 HG21 VAL C   3     -32.196 103.531  53.735  1.00 78.26      K000 H  
ATOM   2750 HG22 VAL C   3     -30.696 103.356  53.241  1.00 78.26      K000 H  
ATOM   2751 HG23 VAL C   3     -31.274 102.408  54.377  1.00 78.26      K000 H  
ATOM   2752  N   PHE C   4     -27.727 105.438  56.334  1.00 54.23      K000 N  
ANISOU 2752  N   PHE C   4     9683   6296   4626   1810    331    232  K000 N  
ATOM   2753  CA  PHE C   4     -27.262 106.481  57.240  1.00 56.00      K000 C  
ANISOU 2753  CA  PHE C   4     9811   6609   4856   1497    204    294  K000 C  
ATOM   2754  C   PHE C   4     -27.841 107.834  56.805  1.00 62.78      K000 C  
ANISOU 2754  C   PHE C   4    10914   7216   5723   1475    -88    362  K000 C  
ATOM   2755  O   PHE C   4     -28.360 107.990  55.712  1.00 55.89      K000 O  
ANISOU 2755  O   PHE C   4    10327   6105   4803   1674   -189    322  K000 O  
ATOM   2756  CB  PHE C   4     -25.765 106.541  57.267  1.00 52.41      K000 C  
ANISOU 2756  CB  PHE C   4     9199   6263   4453   1367    421    221  K000 C  
ATOM   2757  CG  PHE C   4     -25.164 105.287  57.729  1.00 56.05      K000 C  
ANISOU 2757  CG  PHE C   4     9474   6922   4900   1317    746    118  K000 C  
ATOM   2758  CD1 PHE C   4     -25.016 104.235  56.866  1.00 56.76      K000 C  
ANISOU 2758  CD1 PHE C   4     9585   6969   5010   1550    966      8  K000 C  
ATOM   2759  CD2 PHE C   4     -24.787 105.132  59.044  1.00 60.35      K000 C  
ANISOU 2759  CD2 PHE C   4     9865   7670   5397   1014    854    118  K000 C  
ATOM   2760  CE1 PHE C   4     -24.447 103.051  57.311  1.00 61.82      K000 C  
ANISOU 2760  CE1 PHE C   4    10040   7777   5673   1444   1292   -116  K000 C  
ATOM   2761  CE2 PHE C   4     -24.232 103.928  59.476  1.00 60.78      K000 C  
ANISOU 2761  CE2 PHE C   4     9783   7899   5414    898   1146    -23  K000 C  
ATOM   2762  CZ  PHE C   4     -24.088 102.895  58.563  1.00 52.85      K000 C  
ANISOU 2762  CZ  PHE C   4     8751   6849   4480   1111   1355   -144  K000 C  
ATOM   2763  H   PHE C   4     -27.187 105.243  55.694  1.00 65.08      K000 H  
ATOM   2764  HA  PHE C   4     -27.576 106.290  58.138  1.00 67.19      K000 H  
ATOM   2765  HB2 PHE C   4     -25.439 106.720  56.372  1.00 62.90      K000 H  
ATOM   2766  HB3 PHE C   4     -25.488 107.248  57.871  1.00 62.90      K000 H  
ATOM   2767  HD1 PHE C   4     -25.267 104.324  55.975  1.00 68.11      K000 H  
ATOM   2768  HD2 PHE C   4     -24.894 105.835  59.643  1.00 72.43      K000 H  
ATOM   2769  HE1 PHE C   4     -24.345 102.343  56.717  1.00 74.19      K000 H  
ATOM   2770  HE2 PHE C   4     -23.967 103.818  60.361  1.00 72.94      K000 H  
ATOM   2771  HZ  PHE C   4     -23.712 102.089  58.837  1.00 63.42      K000 H  
ATOM   2772  N  APHE C   5     -27.775 108.798  57.699  0.61 61.47      K000 N  
ANISOU 2772  N  APHE C   5    10669   7077   5610   1207   -192    456  K000 N  
ATOM   2773  N  BPHE C   5     -27.716 108.795  57.707  0.39 58.74      K000 N  
ANISOU 2773  N  BPHE C   5    10312   6738   5266   1201   -185    454  K000 N  
ATOM   2774  CA APHE C   5     -28.384 110.100  57.476  0.61 57.14      K000 C  
ANISOU 2774  CA APHE C   5    10314   6283   5113   1105   -448    515  K000 C  
ATOM   2775  CA BPHE C   5     -28.319 110.116  57.630  0.39 59.21      K000 C  
ANISOU 2775  CA BPHE C   5    10545   6570   5383   1076   -433    525  K000 C  
ATOM   2776  C  APHE C   5     -27.294 111.152  57.471  0.61 62.59      K000 C  
ANISOU 2776  C  APHE C   5    10823   6991   5967    868   -499    525  K000 C  
ATOM   2777  C  BPHE C   5     -27.178 111.101  57.408  0.39 58.88      K000 C  
ANISOU 2777  C  BPHE C   5    10338   6535   5497    878   -487    516  K000 C  
ATOM   2778  O  APHE C   5     -26.410 111.168  58.338  0.61 51.19      K000 O  
ANISOU 2778  O  APHE C   5     9119   5722   4610    703   -297    577  K000 O  
ATOM   2779  O  BPHE C   5     -26.100 110.966  58.000  0.39 44.67      K000 O  
ANISOU 2779  O  BPHE C   5     8271   4922   3781    765   -268    542  K000 O  
ATOM   2780  CB APHE C   5     -29.407 110.395  58.555  0.61 70.18      K000 C  
ANISOU 2780  CB APHE C   5    12027   7897   6742   1012   -489    664  K000 C  
ATOM   2781  CB BPHE C   5     -29.078 110.367  58.948  0.39 62.64      K000 C  
ANISOU 2781  CB BPHE C   5    10968   7034   5797    935   -434    678  K000 C  
ATOM   2782  CG APHE C   5     -30.578 109.443  58.559  0.61 77.90      K000 C  
ANISOU 2782  CG APHE C   5    13130   8857   7610   1287   -464    730  K000 C  
ATOM   2783  CG BPHE C   5     -29.836 111.670  59.041  0.39 66.90      K000 C  
ANISOU 2783  CG BPHE C   5    11707   7295   6417    792   -605    763  K000 C  
ATOM   2784  CD1APHE C   5     -31.134 108.993  57.360  0.61 84.19      K000 C  
ANISOU 2784  CD1APHE C   5    14159   9453   8378   1577   -458    660  K000 C  
ATOM   2785  CD2APHE C   5     -31.137 109.008  59.761  0.61 89.99      K000 C  
ANISOU 2785  CD2APHE C   5    14558  10567   9068   1274   -436    891  K000 C  
ATOM   2786  CD1BPHE C   5     -29.174 112.869  59.247  0.39 53.37      K000 C  
ANISOU 2786  CD1BPHE C   5     9871   5516   4892    501   -649    783  K000 C  
ATOM   2787  CD2BPHE C   5     -31.232 111.675  59.015  0.39 64.46      K000 C  
ANISOU 2787  CD2BPHE C   5    11686   6774   6032    945   -667    850  K000 C  
ATOM   2788  CE1APHE C   5     -32.218 108.131  57.364  0.61 77.75      K000 C  
ANISOU 2788  CE1APHE C   5    13410   8595   7537   1864   -374    770  K000 C  
ATOM   2789  CE2APHE C   5     -32.228 108.147  59.768  0.61 75.05      K000 C  
ANISOU 2789  CE2APHE C   5    12700   8687   7130   1559   -435   1014  K000 C  
ATOM   2790  CE1BPHE C   5     -29.876 114.041  59.371  0.39 56.29      K000 C  
ANISOU 2790  CE1BPHE C   5    10403   5611   5374    324   -771    845  K000 C  
ATOM   2791  CE2BPHE C   5     -31.945 112.856  59.146  0.39 59.94      K000 C  
ANISOU 2791  CE2BPHE C   5    11336   5899   5538    790   -756    917  K000 C  
ATOM   2792  CZ APHE C   5     -32.761 107.714  58.574  0.61 77.01      K000 C  
ANISOU 2792  CZ APHE C   5    13118   8716   7426   1860   -379    963  K000 C  
ATOM   2793  CZ BPHE C   5     -31.266 114.035  59.318  0.39 62.11      K000 C  
ANISOU 2793  CZ BPHE C   5    11487   6110   6001    457   -817    895  K000 C  
ATOM   2794  H  APHE C   5     -27.378 108.726  58.459  0.61 73.77      K000 H  
ATOM   2795  H  BPHE C   5     -27.251 108.694  58.424  0.39 70.48      K000 H  
ATOM   2796  HA APHE C   5     -28.829 110.109  56.614  0.61 68.56      K000 H  
ATOM   2797  HB2APHE C   5     -28.975 110.337  59.421  0.61 84.22      K000 H  
ATOM   2798  HB3APHE C   5     -29.754 111.290  58.421  0.61 84.22      K000 H  
ATOM   2799  HA BPHE C   5     -28.939 110.165  56.885  0.39 71.06      K000 H  
ATOM   2800  HB2BPHE C   5     -29.720 109.650  59.072  0.39 75.16      K000 H  
ATOM   2801  HB3BPHE C   5     -28.436 110.355  59.676  0.39 75.16      K000 H  
ATOM   2802  HD1APHE C   5     -30.773 109.277  56.551  0.61101.03      K000 H  
ATOM   2803  HD2APHE C   5     -30.780 109.305  60.567  0.61107.99      K000 H  
ATOM   2804  HD1BPHE C   5     -28.245 112.883  59.281  0.39 64.05      K000 H  
ATOM   2805  HD2BPHE C   5     -31.691 110.874  58.896  0.39 77.35      K000 H  
ATOM   2806  HE1APHE C   5     -32.582 107.834  56.561  0.61 93.30      K000 H  
ATOM   2807  HE2APHE C   5     -32.593 107.860  60.575  0.61 90.06      K000 H  
ATOM   2808  HE1BPHE C   5     -29.421 114.843  59.490  0.39 67.55      K000 H  
ATOM   2809  HE2BPHE C   5     -32.874 112.851  59.107  0.39 71.92      K000 H  
ATOM   2810  HZ APHE C   5     -33.486 107.131  58.578  0.61 92.41      K000 H  
ATOM   2811  HZ BPHE C   5     -31.737 114.832  59.401  0.39 74.53      K000 H  
ATOM   2812  N   ALA C   6     -27.372 112.051  56.519  1.00 53.30      K000 N  
ANISOU 2812  N   ALA C   6     9788   5624   4838    837   -764    486  K000 N  
ATOM   2813  CA  ALA C   6     -26.431 113.132  56.438  1.00 47.63      K000 C  
ANISOU 2813  CA  ALA C   6     8827   4934   4337    615   -882    537  K000 C  
ATOM   2814  C   ALA C   6     -27.194 114.331  55.967  1.00 53.06      K000 C  
ANISOU 2814  C   ALA C   6     9712   5362   5085    431  -1236    516  K000 C  
ATOM   2815  O   ALA C   6     -28.280 114.204  55.390  1.00 54.92      K000 O  
ANISOU 2815  O   ALA C   6    10354   5376   5137    537  -1362    426  K000 O  
ATOM   2816  CB  ALA C   6     -25.308 112.839  55.467  1.00 50.20      K000 C  
ANISOU 2816  CB  ALA C   6     9044   5378   4653    781   -883    497  K000 C  
ATOM   2817  H   ALA C   6     -28.000 112.071  55.932  1.00 63.96      K000 H  
ATOM   2818  HA  ALA C   6     -26.056 113.316  57.313  1.00 57.16      K000 H  
ATOM   2819  HB1 ALA C   6     -24.703 113.595  55.448  1.00 60.24      K000 H  
ATOM   2820  HB2 ALA C   6     -24.838 112.044  55.761  1.00 60.24      K000 H  
ATOM   2821  HB3 ALA C   6     -25.685 112.692  54.585  1.00 60.24      K000 H  
ATOM   2822  N   GLU C   7     -26.624 115.493  56.207  1.00 50.40      K000 N  
ANISOU 2822  N   GLU C   7     9090   5027   5032    142  -1359    601  K000 N  
ATOM   2823  CA  GLU C   7     -27.095 116.703  55.537  1.00 60.39      K000 C  
ANISOU 2823  CA  GLU C   7    10480   6071   6393   -102  -1761    544  K000 C  
ATOM   2824  C   GLU C   7     -26.045 117.132  54.551  1.00 56.03      K000 C  
ANISOU 2824  C   GLU C   7     9697   5662   5928   -120  -2057    544  K000 C  
ATOM   2825  O   GLU C   7     -24.863 117.190  54.888  1.00 55.58      K000 O  
ANISOU 2825  O   GLU C   7     9182   5829   6105   -112  -1905    695  K000 O  
ATOM   2826  CB  GLU C   7     -27.380 117.831  56.501  1.00 56.37      K000 C  
ANISOU 2826  CB  GLU C   7     9796   5423   6200   -462  -1723    653  K000 C  
ATOM   2827  CG  GLU C   7     -28.559 117.553  57.354  1.00 70.19      K000 C  
ANISOU 2827  CG  GLU C   7    11856   6994   7820   -427  -1496    679  K000 C  
ATOM   2828  CD  GLU C   7     -29.129 118.843  57.874  1.00 64.74      K000 C  
ANISOU 2828  CD  GLU C   7    11177   6027   7393   -787  -1532    735  K000 C  
ATOM   2829  OE1 GLU C   7     -28.349 119.733  58.291  1.00 75.59      K000 O  
ANISOU 2829  OE1 GLU C   7    12135   7445   9140  -1060  -1504    841  K000 O  
ATOM   2830  OE2 GLU C   7     -30.354 118.989  57.791  1.00 74.96      K000 O1-
ANISOU 2830  OE2 GLU C   7    12900   7028   8555   -792  -1557    679  K000 O1-
ATOM   2831  H   GLU C   7     -25.967 115.616  56.747  1.00 60.48      K000 H  
ATOM   2832  HA  GLU C   7     -27.910 116.505  55.050  1.00 72.46      K000 H  
ATOM   2833  HB2 GLU C   7     -26.611 117.957  57.079  1.00 67.65      K000 H  
ATOM   2834  HB3 GLU C   7     -27.555 118.641  55.998  1.00 67.65      K000 H  
ATOM   2835  HG2 GLU C   7     -29.241 117.102  56.831  1.00 84.23      K000 H  
ATOM   2836  HG3 GLU C   7     -28.292 117.006  58.110  1.00 84.23      K000 H  
ATOM   2837  N   ASP C   8     -26.499 117.439  53.348  1.00 58.66      K000 N  
ANISOU 2837  N   ASP C   8    10384   5850   6054   -136  -2465    391  K000 N  
ATOM   2838  CA  ASP C   8     -25.649 117.911  52.287  1.00 61.57      K000 C  
ANISOU 2838  CA  ASP C   8    10612   6359   6425   -157  -2870    394  K000 C  
ATOM   2839  C   ASP C   8     -25.775 119.431  52.342  1.00 66.46      K000 C  
ANISOU 2839  C   ASP C   8    10995   6886   7370   -641  -3268    413  K000 C  
ATOM   2840  O   ASP C   8     -26.849 119.970  52.071  1.00 69.04      K000 O  
ANISOU 2840  O   ASP C   8    11729   6916   7586   -883  -3487    240  K000 O  
ATOM   2841  CB  ASP C   8     -26.119 117.321  50.955  1.00 62.28      K000 C  
ANISOU 2841  CB  ASP C   8    11320   6318   6026     89  -3078    199  K000 C  
ATOM   2842  CG  ASP C   8     -25.072 117.386  49.891  1.00 74.54      K000 C  
ANISOU 2842  CG  ASP C   8    12774   8085   7464    228  -3397    246  K000 C  
ATOM   2843  OD1 ASP C   8     -24.022 118.009  50.148  1.00 88.88      K000 O  
ANISOU 2843  OD1 ASP C   8    13987  10155   9630    113  -3513    448  K000 O  
ATOM   2844  OD2 ASP C   8     -25.290 116.792  48.804  1.00 74.80      K000 O1-
ANISOU 2844  OD2 ASP C   8    13342   8020   7058    489  -3493    111  K000 O1-
ATOM   2845  H   ASP C   8     -27.326 117.378  53.121  1.00 70.39      K000 H  
ATOM   2846  HA  ASP C   8     -24.727 117.656  52.449  1.00 73.89      K000 H  
ATOM   2847  HB2 ASP C   8     -26.353 116.389  51.088  1.00 74.74      K000 H  
ATOM   2848  HB3 ASP C   8     -26.893 117.816  50.645  1.00 74.74      K000 H  
ATOM   2849  N   CYS C   9     -24.702 120.114  52.724  1.00 68.12      K000 N  
ANISOU 2849  N   CYS C   9    10546   7318   8020   -791  -3303    629  K000 N  
ATOM   2850  CA  CYS C   9     -24.755 121.528  53.060  1.00 72.75      K000 C  
ANISOU 2850  CA  CYS C   9    10755   7823   9063  -1274  -3552    696  K000 C  
ATOM   2851  C   CYS C   9     -23.873 122.324  52.117  1.00 78.05      K000 C  
ANISOU 2851  C   CYS C   9    11019   8724   9914  -1412  -4130    788  K000 C  
ATOM   2852  O   CYS C   9     -22.733 121.939  51.847  1.00 77.35      K000 O  
ANISOU 2852  O   CYS C   9    10587   8932   9872  -1116  -4089    983  K000 O  
ATOM   2853  CB  CYS C   9     -24.312 121.770  54.501  1.00 71.29      K000 C  
ANISOU 2853  CB  CYS C   9    10075   7662   9348  -1362  -3028    930  K000 C  
ATOM   2854  SG  CYS C   9     -25.421 121.093  55.768  1.00 78.39      K000 S  
ANISOU 2854  SG  CYS C   9    11415   8312  10057  -1288  -2452    869  K000 S  
ATOM   2855  H   CYS C   9     -23.917 119.772  52.798  1.00 81.75      K000 H  
ATOM   2856  HA  CYS C   9     -25.667 121.846  52.965  1.00 87.30      K000 H  
ATOM   2857  HB2 CYS C   9     -23.441 121.364  54.628  1.00 85.54      K000 H  
ATOM   2858  HB3 CYS C   9     -24.249 122.727  54.648  1.00 85.54      K000 H  
ATOM   2859  N   GLY C  10     -24.411 123.444  51.633  1.00 83.56      K000 N  
ANISOU 2859  N   GLY C  10    11753   9279  10717  -1875  -4666    656  K000 N  
ATOM   2860  CA  GLY C  10     -23.721 124.287  50.695  1.00 90.80      K000 C  
ANISOU 2860  CA  GLY C  10    12292  10430  11778  -2084  -5351    725  K000 C  
ATOM   2861  C   GLY C  10     -24.369 125.650  50.610  1.00112.97      K000 C  
ANISOU 2861  C   GLY C  10    15009  13037  14879  -2738  -5810    584  K000 C  
ATOM   2862  O   GLY C  10     -25.584 125.765  50.406  1.00103.74      K000 O  
ANISOU 2862  O   GLY C  10    14510  11502  13403  -2973  -5884    271  K000 O  
ATOM   2863  H   GLY C  10     -25.193 123.733  51.846  1.00100.27      K000 H  
ATOM   2864  HA2 GLY C  10     -22.798 124.396  50.971  1.00108.96      K000 H  
ATOM   2865  HA3 GLY C  10     -23.737 123.878  49.815  1.00108.96      K000 H  
ATOM   2866  N   SER C  11     -23.544 126.687  50.761  1.00122.73      K000 N  
ANISOU 2866  N   SER C  11    15397  14491  16744  -3035  -6083    830  K000 N  
ATOM   2867  CA  SER C  11     -23.974 128.083  50.716  1.00125.71      K000 C  
ANISOU 2867  CA  SER C  11    15501  14717  17544  -3722  -6532    732  K000 C  
ATOM   2868  C   SER C  11     -25.267 128.274  51.509  1.00117.78      K000 C  
ANISOU 2868  C   SER C  11    14993  13203  16555  -4003  -6090    501  K000 C  
ATOM   2869  O   SER C  11     -26.296 128.716  50.994  1.00128.66      K000 O  
ANISOU 2869  O   SER C  11    16940  14266  17678  -4394  -6411    165  K000 O  
ATOM   2870  CB  SER C  11     -24.130 128.560  49.269  1.00126.51      K000 C  
ANISOU 2870  CB  SER C  11    15878  14925  17265  -4018  -7484    499  K000 C  
ATOM   2871  OG  SER C  11     -25.291 128.006  48.687  1.00134.12      K000 O  
ANISOU 2871  OG  SER C  11    17924  15543  17490  -3994  -7514     94  K000 O  
ATOM   2872  H   SER C  11     -22.699 126.602  50.896  1.00147.28      K000 H  
ATOM   2873  HA  SER C  11     -23.290 128.630  51.133  1.00150.85      K000 H  
ATOM   2874  HB2 SER C  11     -24.202 129.527  49.261  1.00151.81      K000 H  
ATOM   2875  HB3 SER C  11     -23.355 128.280  48.758  1.00151.81      K000 H  
ATOM   2876  HG  SER C  11     -25.971 128.241  49.122  1.00160.94      K000 H  
ATOM   2877  N   ASN C  12     -25.202 127.907  52.787  1.00116.58      K000 N  
ANISOU 2877  N   ASN C  12    14671  12953  16671  -3781  -5311    696  K000 N  
ATOM   2878  CA  ASN C  12     -26.274 128.228  53.731  1.00125.12      K000 C  
ANISOU 2878  CA  ASN C  12    16073  13580  17887  -4029  -4838    590  K000 C  
ATOM   2879  C   ASN C  12     -27.605 127.605  53.304  1.00117.14      K000 C  
ANISOU 2879  C   ASN C  12    16082  12232  16195  -3934  -4820    248  K000 C  
ATOM   2880  O   ASN C  12     -28.662 128.241  53.359  1.00102.24      K000 O  
ANISOU 2880  O   ASN C  12    14594   9927  14327  -4327  -4824     38  K000 O  
ATOM   2881  CB  ASN C  12     -26.390 129.743  53.881  1.00133.35      K000 C  
ANISOU 2881  CB  ASN C  12    16631  14447  19587  -4712  -5085    589  K000 C  
ATOM   2882  CG  ASN C  12     -25.025 130.402  54.047  1.00138.60      K000 C  
ANISOU 2882  CG  ASN C  12    16218  15477  20965  -4796  -5208    955  K000 C  
ATOM   2883  ND2 ASN C  12     -24.870 131.615  53.522  1.00133.42      K000 N  
ANISOU 2883  ND2 ASN C  12    15048  14868  20777  -5370  -5813    931  K000 N  
ATOM   2884  OD1 ASN C  12     -24.111 129.804  54.629  1.00140.87      K000 O  
ANISOU 2884  OD1 ASN C  12    16139  15998  21387  -4349  -4752   1264  K000 O  
ATOM   2885  H   ASN C  12     -24.547 127.471  53.134  1.00139.90      K000 H  
ATOM   2886  HA  ASN C  12     -26.043 127.863  54.599  1.00150.14      K000 H  
ATOM   2887  HB2 ASN C  12     -26.809 130.111  53.087  1.00160.02      K000 H  
ATOM   2888  HB3 ASN C  12     -26.923 129.947  54.665  1.00160.02      K000 H  
ATOM   2889 HD21 ASN C  12     -24.116 132.023  53.594  1.00160.10      K000 H  
ATOM   2890 HD22 ASN C  12     -25.526 131.992  53.111  1.00160.10      K000 H  
ATOM   2891  N   LYS C  13     -27.535 126.347  52.865  1.00 93.84      K000 N  
ANISOU 2891  N   LYS C  13    13547   9435  12674  -3397  -4745    208  K000 N  
ATOM   2892  CA  LYS C  13     -28.698 125.556  52.481  1.00 91.30      K000 C  
ANISOU 2892  CA  LYS C  13    14141   8814  11734  -3178  -4618    -45  K000 C  
ATOM   2893  C   LYS C  13     -28.325 124.111  52.752  1.00 84.33      K000 C  
ANISOU 2893  C   LYS C  13    13341   8157  10542  -2537  -4199     87  K000 C  
ATOM   2894  O   LYS C  13     -27.327 123.628  52.219  1.00 83.01      K000 O  
ANISOU 2894  O   LYS C  13    12916   8344  10278  -2270  -4369    179  K000 O  
ATOM   2895  CB  LYS C  13     -29.056 125.752  51.015  1.00 95.79      K000 C  
ANISOU 2895  CB  LYS C  13    15243   9296  11857  -3354  -5253   -349  K000 C  
ATOM   2896  CG  LYS C  13     -30.226 126.682  50.811  1.00115.30      K000 C  
ANISOU 2896  CG  LYS C  13    18210  11277  14322  -3898  -5406   -632  K000 C  
ATOM   2897  CD  LYS C  13     -30.266 127.246  49.407  1.00109.68      K000 C  
ANISOU 2897  CD  LYS C  13    17835  10547  13290  -4269  -6177   -922  K000 C  
ATOM   2898  CE  LYS C  13     -29.040 128.113  49.135  1.00118.57      K000 C  
ANISOU 2898  CE  LYS C  13    18067  12126  14857  -4590  -6798   -765  K000 C  
ATOM   2899  NZ  LYS C  13     -29.352 129.231  48.213  1.00122.21      K000 N1+
ANISOU 2899  NZ  LYS C  13    18650  12514  15269  -5169  -7397  -1025  K000 N1+
ATOM   2900  H   LYS C  13     -26.794 125.918  52.780  1.00112.61      K000 H  
ATOM   2901  HA  LYS C  13     -29.461 125.796  53.030  1.00109.56      K000 H  
ATOM   2902  HB2 LYS C  13     -28.291 126.129  50.551  1.00114.95      K000 H  
ATOM   2903  HB3 LYS C  13     -29.286 124.893  50.629  1.00114.95      K000 H  
ATOM   2904  HG2 LYS C  13     -31.050 126.195  50.965  1.00138.36      K000 H  
ATOM   2905  HG3 LYS C  13     -30.154 127.424  51.433  1.00138.36      K000 H  
ATOM   2906  HD2 LYS C  13     -30.274 126.517  48.767  1.00131.61      K000 H  
ATOM   2907  HD3 LYS C  13     -31.058 127.796  49.302  1.00131.61      K000 H  
ATOM   2908  HE2 LYS C  13     -28.723 128.489  49.971  1.00142.28      K000 H  
ATOM   2909  HE3 LYS C  13     -28.348 127.568  48.728  1.00142.28      K000 H  
ATOM   2910  HZ1 LYS C  13     -28.622 129.720  48.071  1.00146.65      K000 H  
ATOM   2911  HZ2 LYS C  13     -29.641 128.912  47.434  1.00146.65      K000 H  
ATOM   2912  HZ3 LYS C  13     -29.984 129.749  48.566  1.00146.65      K000 H  
ATOM   2913  N   CYS C  14     -29.086 123.430  53.600  1.00 56.46      K000 N  
ANISOU 2913  N   CYS C  14     9860   4160   7432   -594   -594   -847  K000 N  
ATOM   2914  CA  CYS C  14     -28.783 122.050  53.931  1.00 66.43      K000 C  
ANISOU 2914  CA  CYS C  14    11058   5688   8493   -331   -622   -682  K000 C  
ATOM   2915  C   CYS C  14     -29.968 121.224  53.468  1.00 53.47      K000 C  
ANISOU 2915  C   CYS C  14     9663   3874   6778   -199   -315   -669  K000 C  
ATOM   2916  O   CYS C  14     -31.076 121.704  53.458  1.00 56.53      K000 O  
ANISOU 2916  O   CYS C  14    10183   3965   7331   -202    -39   -682  K000 O  
ATOM   2917  CB  CYS C  14     -28.538 121.877  55.441  1.00 62.74      K000 C  
ANISOU 2917  CB  CYS C  14    10276   5438   8124    -99   -556   -404  K000 C  
ATOM   2918  SG  CYS C  14     -26.990 122.577  56.064  1.00 87.47      K000 S  
ANISOU 2918  SG  CYS C  14    13047   8872  11314   -189   -910   -455  K000 S  
ATOM   2919  H   CYS C  14     -29.779 123.747  53.996  1.00 67.75      K000 H  
ATOM   2920  HA  CYS C  14     -27.993 121.761  53.450  1.00 79.71      K000 H  
ATOM   2921  HB2 CYS C  14     -29.265 122.304  55.921  1.00 75.29      K000 H  
ATOM   2922  HB3 CYS C  14     -28.530 120.928  55.644  1.00 75.29      K000 H  
ATOM   2923  N   ALA C  15     -29.719 120.001  53.027  1.00 59.43      K000 N  
ANISOU 2923  N   ALA C  15    10479   4802   7301   -100   -370   -670  K000 N  
ATOM   2924  CA  ALA C  15     -30.821 119.117  52.695  1.00 54.13      K000 C  
ANISOU 2924  CA  ALA C  15     9958   4017   6594     55    -46   -675  K000 C  
ATOM   2925  C   ALA C  15     -30.452 117.743  53.228  1.00 48.79      K000 C  
ANISOU 2925  C   ALA C  15     9091   3628   5818    295    -77   -496  K000 C  
ATOM   2926  O   ALA C  15     -29.313 117.293  53.058  1.00 50.62      K000 O  
ANISOU 2926  O   ALA C  15     9262   4104   5866    224   -379   -489  K000 O  
ATOM   2927  CB  ALA C  15     -31.050 119.062  51.186  1.00 68.59      K000 C  
ANISOU 2927  CB  ALA C  15    12134   5715   8213   -168    -17   -963  K000 C  
ATOM   2928  H   ALA C  15     -28.937 119.664  52.912  1.00 71.32      K000 H  
ATOM   2929  HA  ALA C  15     -31.634 119.419  53.130  1.00 64.96      K000 H  
ATOM   2930  HB1 ALA C  15     -31.790 118.464  51.001  1.00 82.31      K000 H  
ATOM   2931  HB2 ALA C  15     -31.257 119.954  50.866  1.00 82.31      K000 H  
ATOM   2932  HB3 ALA C  15     -30.245 118.735  50.756  1.00 82.31      K000 H  
ATOM   2933  N   ILE C  16     -31.421 117.061  53.812  1.00 50.51      K000 N  
ANISOU 2933  N   ILE C  16     9228   3791   6171    576    203   -372  K000 N  
ATOM   2934  CA  ILE C  16     -31.126 115.734  54.358  1.00 48.15      K000 C  
ANISOU 2934  CA  ILE C  16     8719   3753   5824    812    160   -217  K000 C  
ATOM   2935  C   ILE C  16     -31.002 114.779  53.184  1.00 48.46      K000 C  
ANISOU 2935  C   ILE C  16     8899   3878   5636    681    204   -386  K000 C  
ATOM   2936  O   ILE C  16     -31.857 114.788  52.311  1.00 51.08      K000 O  
ANISOU 2936  O   ILE C  16     9440   4026   5944    604    469   -581  K000 O  
ATOM   2937  CB  ILE C  16     -32.276 115.294  55.270  1.00 57.78      K000 C  
ANISOU 2937  CB  ILE C  16     9819   4855   7280   1163    419    -67  K000 C  
ATOM   2938  CG1 ILE C  16     -32.254 116.124  56.526  1.00 53.63      K000 C  
ANISOU 2938  CG1 ILE C  16     9185   4286   6905   1276    361    155  K000 C  
ATOM   2939  CG2 ILE C  16     -32.122 113.858  55.664  1.00 57.77      K000 C  
ANISOU 2939  CG2 ILE C  16     9601   5087   7262   1401    388     32  K000 C  
ATOM   2940  CD1 ILE C  16     -33.680 116.099  57.324  1.00 60.35      K000 C  
ANISOU 2940  CD1 ILE C  16    10061   4861   8008   1581    624    297  K000 C  
ATOM   2941  H   ILE C  16     -32.234 117.325  53.906  1.00 60.61      K000 H  
ATOM   2942  HA  ILE C  16     -30.295 115.747  54.859  1.00 57.78      K000 H  
ATOM   2943  HB  ILE C  16     -33.122 115.417  54.812  1.00 69.34      K000 H  
ATOM   2944 HG12 ILE C  16     -31.572 115.778  57.121  1.00 64.36      K000 H  
ATOM   2945 HG13 ILE C  16     -32.058 117.045  56.293  1.00 64.36      K000 H  
ATOM   2946 HG21 ILE C  16     -32.861 113.607  56.239  1.00 69.33      K000 H  
ATOM   2947 HG22 ILE C  16     -32.124 113.310  54.864  1.00 69.33      K000 H  
ATOM   2948 HG23 ILE C  16     -31.281 113.749  56.138  1.00 69.33      K000 H  
ATOM   2949 HD11 ILE C  16     -33.605 116.649  58.120  1.00 72.42      K000 H  
ATOM   2950 HD12 ILE C  16     -34.373 116.451  56.743  1.00 72.42      K000 H  
ATOM   2951 HD13 ILE C  16     -33.886 115.185  57.571  1.00 72.42      K000 H  
ATOM   2952  N   ILE C  17     -30.066 113.879  53.239  1.00 47.58      K000 N  
ANISOU 2952  N   ILE C  17     8669   4034   5375    680    -13   -307  K000 N  
ATOM   2953  CA  ILE C  17     -29.969 112.828  52.244  1.00 60.44      K000 C  
ANISOU 2953  CA  ILE C  17    10420   5760   6785    545     69   -419  K000 C  
ATOM   2954  C   ILE C  17     -29.742 111.482  52.928  1.00 51.35      K000 C  
ANISOU 2954  C   ILE C  17     8979   4836   5695    763     41   -253  K000 C  
ATOM   2955  O   ILE C  17     -29.222 111.436  54.074  1.00 48.00      K000 O  
ANISOU 2955  O   ILE C  17     8306   4539   5394    966   -192    -59  K000 O  
ATOM   2956  CB  ILE C  17     -28.816 113.104  51.290  1.00 57.04      K000 C  
ANISOU 2956  CB  ILE C  17    10236   5397   6040    199   -256   -513  K000 C  
ATOM   2957  CG1 ILE C  17     -27.500 113.147  52.056  1.00 52.22      K000 C  
ANISOU 2957  CG1 ILE C  17     9429   4981   5432    240   -712   -349  K000 C  
ATOM   2958  CG2 ILE C  17     -29.045 114.475  50.533  1.00 66.90      K000 C  
ANISOU 2958  CG2 ILE C  17    11777   6402   7239    -28   -269   -717  K000 C  
ATOM   2959  CD1 ILE C  17     -26.258 113.163  51.071  1.00 65.68      K000 C  
ANISOU 2959  CD1 ILE C  17    11390   6746   6819    -79  -1113   -434  K000 C  
ATOM   2960  H   ILE C  17     -29.459 113.844  53.848  1.00 57.10      K000 H  
ATOM   2961  HA  ILE C  17     -30.793 112.783  51.733  1.00 72.53      K000 H  
ATOM   2962  HB  ILE C  17     -28.773 112.389  50.636  1.00 68.45      K000 H  
ATOM   2963 HG12 ILE C  17     -27.470 113.953  52.597  1.00 62.67      K000 H  
ATOM   2964 HG13 ILE C  17     -27.432 112.361  52.620  1.00 62.67      K000 H  
ATOM   2965 HG21 ILE C  17     -28.300 114.632  49.932  1.00 80.28      K000 H  
ATOM   2966 HG22 ILE C  17     -29.871 114.423  50.029  1.00 80.28      K000 H  
ATOM   2967 HG23 ILE C  17     -29.099 115.190  51.186  1.00 80.28      K000 H  
ATOM   2968 HD11 ILE C  17     -25.441 113.190  51.594  1.00 78.81      K000 H  
ATOM   2969 HD12 ILE C  17     -26.277 112.360  50.528  1.00 78.81      K000 H  
ATOM   2970 HD13 ILE C  17     -26.316 113.948  50.505  1.00 78.81      K000 H  
HETATM 2971  N   SAR C  18     -30.072 110.385  52.248  1.00 52.73      K000 N  
ANISOU 2971  N   SAR C  18     9175   5076   5783    709    268   -342  K000 N  
HETATM 2972  CA  SAR C  18     -29.659 109.075  52.790  1.00 51.13      K000 C  
ANISOU 2972  CA  SAR C  18     8692   5100   5637    848    180   -200  K000 C  
HETATM 2973  C   SAR C  18     -28.566 108.611  52.129  1.00 60.18      K000 C  
ANISOU 2973  C   SAR C  18     9972   6389   6505    566    -55   -188  K000 C  
HETATM 2974  O   SAR C  18     -28.375 108.919  50.989  1.00 66.45      K000 O  
ANISOU 2974  O   SAR C  18    11103   7121   7022    250    -26   -326  K000 O  
HETATM 2975  CN  SAR C  18     -30.860 110.386  51.004  1.00 55.06      K000 C  
ANISOU 2975  CN  SAR C  18     9743   5236   5941    518    624   -594  K000 C  
HETATM 2976  HN1 SAR C  18     -31.735 109.966  51.169  1.00 66.07      K000 H  
HETATM 2977  HN2 SAR C  18     -30.994 111.313  50.702  1.00 66.07      K000 H  
HETATM 2978  HN3 SAR C  18     -30.382 109.883  50.315  1.00 66.07      K000 H  
HETATM 2979  HA2 SAR C  18     -29.650 108.916  53.744  1.00 61.36      K000 H  
HETATM 2980  HA3 SAR C  18     -30.409 108.562  52.400  1.00 61.36      K000 H  
ATOM   2981  N   LEU C  19     -27.739 107.838  52.815  1.00 49.87      K000 N  
ANISOU 2981  N   LEU C  19     8437   5269   5242    661   -342    -19  K000 N  
ATOM   2982  CA  LEU C  19     -26.573 107.161  52.239  1.00 51.15      K000 C  
ANISOU 2982  CA  LEU C  19     8721   5563   5151    388   -625     30  K000 C  
ATOM   2983  C   LEU C  19     -26.786 105.689  52.495  1.00 59.63      K000 C  
ANISOU 2983  C   LEU C  19     9521   6776   6359    480   -472     93  K000 C  
ATOM   2984  O   LEU C  19     -26.685 105.249  53.606  1.00 51.36      K000 O  
ANISOU 2984  O   LEU C  19     8142   5820   5553    774   -627    220  K000 O  
ATOM   2985  CB  LEU C  19     -25.260 107.626  52.859  1.00 51.70      K000 C  
ANISOU 2985  CB  LEU C  19     8750   5706   5189    416  -1183    152  K000 C  
ATOM   2986  CG  LEU C  19     -24.998 109.109  52.686  1.00 65.11      K000 C  
ANISOU 2986  CG  LEU C  19    10639   7280   6818    331  -1355     66  K000 C  
ATOM   2987  CD1 LEU C  19     -23.770 109.468  53.419  1.00 86.56      K000 C  
ANISOU 2987  CD1 LEU C  19    13222  10099   9568    414  -1866    150  K000 C  
ATOM   2988  CD2 LEU C  19     -24.836 109.388  51.195  1.00 75.67      K000 C  
ANISOU 2988  CD2 LEU C  19    12421   8505   7826    -62  -1341    -86  K000 C  
ATOM   2989  H   LEU C  19     -27.834 107.679  53.655  1.00 59.84      K000 H  
ATOM   2990  HA  LEU C  19     -26.540 107.313  51.281  1.00 61.38      K000 H  
ATOM   2991  HB2 LEU C  19     -25.279 107.437  53.810  1.00 62.04      K000 H  
ATOM   2992  HB3 LEU C  19     -24.529 107.145  52.442  1.00 62.04      K000 H  
ATOM   2993  HG  LEU C  19     -25.742 109.626  53.032  1.00 78.13      K000 H  
ATOM   2994 HD11 LEU C  19     -23.603 110.417  53.307  1.00103.87      K000 H  
ATOM   2995 HD12 LEU C  19     -23.891 109.261  54.358  1.00103.87      K000 H  
ATOM   2996 HD13 LEU C  19     -23.028 108.956  53.060  1.00103.87      K000 H  
ATOM   2997 HD21 LEU C  19     -24.668 110.335  51.068  1.00 90.81      K000 H  
ATOM   2998 HD22 LEU C  19     -24.091 108.870  50.856  1.00 90.81      K000 H  
ATOM   2999 HD23 LEU C  19     -25.652 109.133  50.736  1.00 90.81      K000 H  
ATOM   3000  N   MET C  20     -27.092 104.932  51.464  1.00 51.52      K000 N  
ANISOU 3000  N   MET C  20     8631   5771   5174    219   -159    -11  K000 N  
ATOM   3001  CA  MET C  20     -27.555 103.570  51.612  1.00 61.23      K000 C  
ANISOU 3001  CA  MET C  20     9554   7120   6591    290    107    -12  K000 C  
ATOM   3002  C   MET C  20     -26.378 102.625  51.464  1.00 65.14      K000 C  
ANISOU 3002  C   MET C  20    10057   7749   6944     53   -197    133  K000 C  
ATOM   3003  O   MET C  20     -25.537 102.829  50.598  1.00 60.23      K000 O  
ANISOU 3003  O   MET C  20     9821   7101   5962   -307   -388    157  K000 O  
ATOM   3004  CB  MET C  20     -28.601 103.249  50.557  1.00 64.70      K000 C  
ANISOU 3004  CB  MET C  20    10105   7523   6953    121    689   -241  K000 C  
ATOM   3005  CG  MET C  20     -29.211 101.895  50.764  1.00 78.63      K000 C  
ANISOU 3005  CG  MET C  20    11468   9414   8993    227   1009   -293  K000 C  
ATOM   3006  SD  MET C  20     -30.491 101.561  49.568  1.00 89.57      K000 S  
ANISOU 3006  SD  MET C  20    12931  10781  10321     65   1739   -625  K000 S  
ATOM   3007  CE  MET C  20     -31.780 101.077  50.728  1.00 97.57      K000 C  
ANISOU 3007  CE  MET C  20    13342  11765  11966    638   1935   -718  K000 C  
ATOM   3008  H   MET C  20     -27.039 105.191  50.646  1.00 61.83      K000 H  
ATOM   3009  HA  MET C  20     -27.954 103.457  52.489  1.00 73.48      K000 H  
ATOM   3010  HB2 MET C  20     -29.310 103.909  50.600  1.00 77.64      K000 H  
ATOM   3011  HB3 MET C  20     -28.184 103.262  49.681  1.00 77.64      K000 H  
ATOM   3012  HG2 MET C  20     -28.524 101.217  50.670  1.00 94.35      K000 H  
ATOM   3013  HG3 MET C  20     -29.605 101.854  51.649  1.00 94.35      K000 H  
ATOM   3014  HE1 MET C  20     -32.582 100.852  50.232  1.00117.08      K000 H  
ATOM   3015  HE2 MET C  20     -31.477 100.307  51.234  1.00117.08      K000 H  
ATOM   3016  HE3 MET C  20     -31.959 101.818  51.328  1.00117.08      K000 H  
ATOM   3017  N   VAL C  21     -26.322 101.601  52.317  1.00 51.50      K000 N  
ANISOU 3017  N   VAL C  21     7922   6139   5507    260   -277    229  K000 N  
ATOM   3018  CA  VAL C  21     -25.293 100.555  52.243  1.00 65.95      K000 C  
ANISOU 3018  CA  VAL C  21     9712   8075   7271     43   -550    365  K000 C  
ATOM   3019  C   VAL C  21     -26.040  99.242  52.414  1.00 62.39      K000 C  
ANISOU 3019  C   VAL C  21     8853   7728   7124    115   -190    306  K000 C  
ATOM   3020  O   VAL C  21     -26.276  98.799  53.553  1.00 60.72      K000 O  
ANISOU 3020  O   VAL C  21     8217   7568   7285    496   -323    350  K000 O  
ATOM   3021  CB  VAL C  21     -24.201 100.716  53.331  1.00 64.48      K000 C  
ANISOU 3021  CB  VAL C  21     9397   7923   7182    262  -1179    539  K000 C  
ATOM   3022  CG1 VAL C  21     -23.161  99.613  53.210  1.00 62.12      K000 C  
ANISOU 3022  CG1 VAL C  21     9078   7689   6835     27  -1481    667  K000 C  
ATOM   3023  CG2 VAL C  21     -23.575 102.095  53.265  1.00 62.10      K000 C  
ANISOU 3023  CG2 VAL C  21     9404   7529   6663    244  -1503    545  K000 C  
ATOM   3024  H   VAL C  21     -26.880 101.487  52.961  1.00 61.80      K000 H  
ATOM   3025  HA  VAL C  21     -24.872 100.566  51.370  1.00 79.14      K000 H  
ATOM   3026  HB  VAL C  21     -24.618 100.628  54.202  1.00 77.38      K000 H  
ATOM   3027 HG11 VAL C  21     -22.490  99.736  53.900  1.00 74.54      K000 H  
ATOM   3028 HG12 VAL C  21     -23.597  98.754  53.322  1.00 74.54      K000 H  
ATOM   3029 HG13 VAL C  21     -22.748  99.663  52.334  1.00 74.54      K000 H  
ATOM   3030 HG21 VAL C  21     -22.897 102.166  53.955  1.00 74.52      K000 H  
ATOM   3031 HG22 VAL C  21     -23.172 102.217  52.391  1.00 74.52      K000 H  
ATOM   3032 HG23 VAL C  21     -24.265 102.761  53.408  1.00 74.52      K000 H  
TER    3033      VAL C  21 
HETATM 3034  N   ORN D   1      -8.320  90.320  66.744  1.00 63.98      K000 N  
ANISOU 3034  N   ORN D   1     6415  11984   5911  -1545    391    305  K000 N  
HETATM 3035  CA  ORN D   1      -8.893  91.590  66.251  1.00 72.60      K000 C  
ANISOU 3035  CA  ORN D   1     7917  12414   7256  -1024    613    338  K000 C  
HETATM 3036  C   ORN D   1      -7.891  92.677  66.578  1.00 55.49      K000 C  
ANISOU 3036  C   ORN D   1     6142   9730   5213  -1270    496   -147  K000 C  
HETATM 3037  O   ORN D   1      -6.945  92.475  67.360  1.00 60.86      K000 O  
ANISOU 3037  O   ORN D   1     6756  10585   5784  -1751    347   -446  K000 O  
HETATM 3038  CB  ORN D   1     -10.224  91.953  66.988  1.00 64.81      K000 C  
ANISOU 3038  CB  ORN D   1     6663  11772   6189   -564    776    898  K000 C  
HETATM 3039  CG  ORN D   1     -11.483  91.265  66.490  1.00 71.71      K000 C  
ANISOU 3039  CG  ORN D   1     7214  12905   7129    -73   1096   1546  K000 C  
HETATM 3040  CD  ORN D   1     -12.136  91.866  65.187  1.00 67.06      K000 C  
ANISOU 3040  CD  ORN D   1     7179  11500   6799    439   1566   1573  K000 C  
HETATM 3041  NE  ORN D   1     -12.618  93.236  65.376  1.00 66.66      K000 N  
ANISOU 3041  NE  ORN D   1     7550  10957   6822    742   1745   1543  K000 N  
HETATM 3042  HA  ORN D   1      -8.988  91.508  65.164  1.00 87.13      K000 H  
HETATM 3043  HB2 ORN D   1     -10.118  91.745  68.061  1.00 77.77      K000 H  
HETATM 3044  HB3 ORN D   1     -10.388  93.030  66.833  1.00 77.77      K000 H  
HETATM 3045  HG2 ORN D   1     -12.232  91.307  67.290  1.00 86.06      K000 H  
HETATM 3046  HG3 ORN D   1     -11.246  90.211  66.303  1.00 86.06      K000 H  
HETATM 3047  HD2 ORN D   1     -11.388  91.863  64.389  1.00 80.47      K000 H  
HETATM 3048  HD3 ORN D   1     -12.990  91.240  64.911  1.00 80.47      K000 H  
HETATM 3049  HE1 ORN D   1     -13.558  93.327  65.757  1.00 79.99      K000 H  
HETATM 3050  H1  ORN D   1      -8.807  89.492  66.392  1.00 76.78      K000 H  
HETATM 3051  H2  ORN D   1      -7.341  90.189  66.480  1.00 76.78      K000 H  
HETATM 3052  H3  ORN D   1      -8.340  90.235  67.763  1.00 76.78      K000 H  
ATOM   3053  N   LEU D   2      -8.153  93.878  65.994  1.00 51.86      K000 N  
ANISOU 3053  N   LEU D   2     6121   8601   4983   -949    619   -177  K000 N  
ATOM   3054  CA  LEU D   2      -7.345  95.060  66.222  1.00 48.90      K000 C  
ANISOU 3054  CA  LEU D   2     6071   7697   4812  -1099    529   -482  K000 C  
ATOM   3055  C   LEU D   2      -7.989  95.873  67.331  1.00 53.22      K000 C  
ANISOU 3055  C   LEU D   2     6557   8402   5263   -872    576   -312  K000 C  
ATOM   3056  O   LEU D   2      -9.202  95.979  67.388  1.00 54.68      K000 O  
ANISOU 3056  O   LEU D   2     6668   8758   5349   -453    739     61  K000 O  
ATOM   3057  CB  LEU D   2      -7.231  95.924  64.985  1.00 46.55      K000 C  
ANISOU 3057  CB  LEU D   2     6268   6650   4771  -1009    554   -540  K000 C  
ATOM   3058  CG  LEU D   2      -6.576  95.195  63.802  1.00 46.49      K000 C  
ANISOU 3058  CG  LEU D   2     6358   6447   4859  -1260    491   -685  K000 C  
ATOM   3059  CD1 LEU D   2      -6.746  96.156  62.583  1.00 52.20      K000 C  
ANISOU 3059  CD1 LEU D   2     7643   6477   5715  -1221    504   -632  K000 C  
ATOM   3060  CD2 LEU D   2      -5.178  94.771  64.080  1.00 58.71      K000 C  
ANISOU 3060  CD2 LEU D   2     7734   8013   6559  -1706    341   -989  K000 C  
ATOM   3061  H   LEU D   2      -8.824  94.019  65.475  1.00 62.24      K000 H  
ATOM   3062  HA  LEU D   2      -6.454  94.799  66.504  1.00 58.68      K000 H  
ATOM   3063  HB2 LEU D   2      -8.118  96.201  64.711  1.00 55.87      K000 H  
ATOM   3064  HB3 LEU D   2      -6.690  96.701  65.192  1.00 55.87      K000 H  
ATOM   3065  HG  LEU D   2      -7.089  94.393  63.613  1.00 55.79      K000 H  
ATOM   3066 HD11 LEU D   2      -6.348  95.745  61.799  1.00 62.64      K000 H  
ATOM   3067 HD12 LEU D   2      -7.691  96.311  62.432  1.00 62.64      K000 H  
ATOM   3068 HD13 LEU D   2      -6.301  96.995  62.779  1.00 62.64      K000 H  
ATOM   3069 HD21 LEU D   2      -4.825  94.320  63.298  1.00 70.45      K000 H  
ATOM   3070 HD22 LEU D   2      -4.645  95.557  64.278  1.00 70.45      K000 H  
ATOM   3071 HD23 LEU D   2      -5.176  94.169  64.840  1.00 70.45      K000 H  
ATOM   3072  N   VAL D   3      -7.171  96.441  68.207  1.00 46.70      K000 N  
ANISOU 3072  N   VAL D   3     5308   7075   5359   -544    778   -907  K000 N  
ATOM   3073  CA  VAL D   3      -7.746  97.319  69.191  1.00 44.04      K000 C  
ANISOU 3073  CA  VAL D   3     5068   6816   4848   -410    780   -789  K000 C  
ATOM   3074  C   VAL D   3      -7.045  98.633  68.945  1.00 48.48      K000 C  
ANISOU 3074  C   VAL D   3     5882   6845   5693   -285   1004   -909  K000 C  
ATOM   3075  O   VAL D   3      -5.811  98.716  69.026  1.00 46.29      K000 O  
ANISOU 3075  O   VAL D   3     5746   6277   5563   -499   1174  -1203  K000 O  
ATOM   3076  CB  VAL D   3      -7.526  96.832  70.592  1.00 51.32      K000 C  
ANISOU 3076  CB  VAL D   3     6049   8099   5350   -801    715   -895  K000 C  
ATOM   3077  CG1 VAL D   3      -8.064  97.861  71.551  1.00 66.67      K000 C  
ANISOU 3077  CG1 VAL D   3     8123  10113   7097   -718    722   -751  K000 C  
ATOM   3078  CG2 VAL D   3      -8.190  95.463  70.794  1.00 50.76      K000 C  
ANISOU 3078  CG2 VAL D   3     5682   8577   5028   -980    431   -705  K000 C  
ATOM   3079  H   VAL D   3      -6.311  96.447  68.192  1.00 56.04      K000 H  
ATOM   3080  HA  VAL D   3      -8.697  97.427  69.033  1.00 52.84      K000 H  
ATOM   3081  HB  VAL D   3      -6.574  96.736  70.751  1.00 61.58      K000 H  
ATOM   3082 HG11 VAL D   3      -7.923  97.549  72.458  1.00 80.01      K000 H  
ATOM   3083 HG12 VAL D   3      -7.594  98.698  71.411  1.00 80.01      K000 H  
ATOM   3084 HG13 VAL D   3      -9.012  97.981  71.385  1.00 80.01      K000 H  
ATOM   3085 HG21 VAL D   3      -8.034  95.168  71.705  1.00 60.91      K000 H  
ATOM   3086 HG22 VAL D   3      -9.142  95.547  70.630  1.00 60.91      K000 H  
ATOM   3087 HG23 VAL D   3      -7.802  94.829  70.171  1.00 60.91      K000 H  
ATOM   3088  N   PHE D   4      -7.818  99.673  68.649  1.00 40.86      K000 N  
ANISOU 3088  N   PHE D   4     4960   5721   4845     60    997   -669  K000 N  
ATOM   3089  CA  PHE D   4      -7.313 101.015  68.554  1.00 42.16      K000 C  
ANISOU 3089  CA  PHE D   4     5327   5449   5243    162   1164   -689  K000 C  
ATOM   3090  C   PHE D   4      -7.594 101.760  69.858  1.00 49.30      K000 C  
ANISOU 3090  C   PHE D   4     6330   6531   5870    113   1198   -628  K000 C  
ATOM   3091  O   PHE D   4      -8.441 101.378  70.663  1.00 48.60      K000 O  
ANISOU 3091  O   PHE D   4     6170   6864   5432     63   1022   -470  K000 O  
ATOM   3092  CB  PHE D   4      -7.990 101.757  67.385  1.00 49.57      K000 C  
ANISOU 3092  CB  PHE D   4     6307   6086   6440    498   1106   -442  K000 C  
ATOM   3093  CG  PHE D   4      -7.729 101.150  66.055  1.00 50.08      K000 C  
ANISOU 3093  CG  PHE D   4     6316   5992   6718    483   1092   -488  K000 C  
ATOM   3094  CD1 PHE D   4      -8.558 100.175  65.564  1.00 53.39      K000 C  
ANISOU 3094  CD1 PHE D   4     6550   6718   7018    569    995   -419  K000 C  
ATOM   3095  CD2 PHE D   4      -6.654 101.553  65.300  1.00 52.40      K000 C  
ANISOU 3095  CD2 PHE D   4     6717   5847   7344    356   1171   -570  K000 C  
ATOM   3096  CE1 PHE D   4      -8.299  99.592  64.345  1.00 55.06      K000 C  
ANISOU 3096  CE1 PHE D   4     6716   6844   7362    485   1009   -469  K000 C  
ATOM   3097  CE2 PHE D   4      -6.412 100.976  64.085  1.00 47.71      K000 C  
ANISOU 3097  CE2 PHE D   4     6093   5142   6893    255   1118   -572  K000 C  
ATOM   3098  CZ  PHE D   4      -7.229  99.997  63.637  1.00 45.13      K000 C  
ANISOU 3098  CZ  PHE D   4     5613   5168   6367    300   1053   -539  K000 C  
ATOM   3099  HA  PHE D   4      -6.355 100.997  68.403  1.00 50.59      K000 H  
ATOM   3100  HB2 PHE D   4      -8.949 101.755  67.527  1.00 59.48      K000 H  
ATOM   3101  HB3 PHE D   4      -7.663 102.670  67.363  1.00 59.48      K000 H  
ATOM   3102  HD1 PHE D   4      -9.283  99.887  66.069  1.00 64.07      K000 H  
ATOM   3103  HD2 PHE D   4      -6.083 102.214  65.622  1.00 62.87      K000 H  
ATOM   3104  HE1 PHE D   4      -8.858  98.928  64.013  1.00 66.08      K000 H  
ATOM   3105  HE2 PHE D   4      -5.680 101.244  63.577  1.00 57.25      K000 H  
ATOM   3106  HZ  PHE D   4      -7.067  99.618  62.804  1.00 54.16      K000 H  
ATOM   3107  N   PHE D   5      -6.857 102.825  70.074  1.00 42.19      K000 N  
ANISOU 3107  N   PHE D   5     5572   5325   5135     90   1415   -725  K000 N  
ATOM   3108  CA  PHE D   5      -7.015 103.578  71.292  1.00 44.20      K000 C  
ANISOU 3108  CA  PHE D   5     5925   5772   5098    -21   1499   -688  K000 C  
ATOM   3109  C   PHE D   5      -7.359 105.004  71.010  1.00 53.72      K000 C  
ANISOU 3109  C   PHE D   5     7211   6697   6501    209   1509   -415  K000 C  
ATOM   3110  O   PHE D   5      -6.845 105.608  70.059  1.00 47.32      K000 O  
ANISOU 3110  O   PHE D   5     6418   5442   6120    350   1591   -397  K000 O  
ATOM   3111  CB  PHE D   5      -5.756 103.499  72.095  1.00 56.56      K000 C  
ANISOU 3111  CB  PHE D   5     7569   7321   6601   -338   1827  -1112  K000 C  
ATOM   3112  CG  PHE D   5      -5.419 102.124  72.480  1.00 67.17      K000 C  
ANISOU 3112  CG  PHE D   5     8899   8934   7690   -637   1789  -1382  K000 C  
ATOM   3113  CD1 PHE D   5      -5.992 101.564  73.604  1.00 72.04      K000 C  
ANISOU 3113  CD1 PHE D   5     9553  10084   7734   -927   1652  -1345  K000 C  
ATOM   3114  CD2 PHE D   5      -4.568 101.378  71.704  1.00 73.59      K000 C  
ANISOU 3114  CD2 PHE D   5     9666   9473   8821   -681   1832  -1615  K000 C  
ATOM   3115  CE1 PHE D   5      -5.705 100.275  73.963  1.00 76.40      K000 C  
ANISOU 3115  CE1 PHE D   5    10106  10903   8020  -1264   1570  -1555  K000 C  
ATOM   3116  CE2 PHE D   5      -4.269 100.076  72.045  1.00 74.10      K000 C  
ANISOU 3116  CE2 PHE D   5     9735   9785   8636  -1001   1757  -1838  K000 C  
ATOM   3117  CZ  PHE D   5      -4.844  99.522  73.180  1.00 67.36      K000 C  
ANISOU 3117  CZ  PHE D   5     8926   9475   7194  -1296   1629  -1812  K000 C  
ATOM   3118  H   PHE D   5      -6.262 103.131  69.534  1.00 50.63      K000 H  
ATOM   3119  HA  PHE D   5      -7.734 103.191  71.816  1.00 53.04      K000 H  
ATOM   3120  HB2 PHE D   5      -5.022 103.852  71.568  1.00 67.88      K000 H  
ATOM   3121  HB3 PHE D   5      -5.865 104.020  72.906  1.00 67.88      K000 H  
ATOM   3122  HD1 PHE D   5      -6.574 102.069  74.125  1.00 86.44      K000 H  
ATOM   3123  HD2 PHE D   5      -4.191 101.754  70.941  1.00 88.31      K000 H  
ATOM   3124  HE1 PHE D   5      -6.090  99.904  74.725  1.00 91.68      K000 H  
ATOM   3125  HE2 PHE D   5      -3.687  99.575  71.521  1.00 88.92      K000 H  
ATOM   3126  HZ  PHE D   5      -4.641  98.647  73.423  1.00 80.84      K000 H  
ATOM   3127  N   ALA D   6      -8.229 105.522  71.854  1.00 43.93      K000 N  
ANISOU 3127  N   ALA D   6     6027   5729   4936    193   1381   -163  K000 N  
ATOM   3128  CA  ALA D   6      -8.624 106.900  71.742  1.00 46.84      K000 C  
ANISOU 3128  CA  ALA D   6     6495   5875   5427    348   1350    135  K000 C  
ATOM   3129  C   ALA D   6      -8.859 107.476  73.102  1.00 46.76      K000 C  
ANISOU 3129  C   ALA D   6     6558   6211   4996    100   1378    235  K000 C  
ATOM   3130  O   ALA D   6      -9.271 106.787  74.046  1.00 50.02      K000 O  
ANISOU 3130  O   ALA D   6     6961   7076   4966   -132   1255    239  K000 O  
ATOM   3131  CB  ALA D   6      -9.931 107.073  70.951  1.00 52.67      K000 C  
ANISOU 3131  CB  ALA D   6     7264   6478   6271    683   1014    514  K000 C  
ATOM   3132  H   ALA D   6      -8.603 105.093  72.500  1.00 52.72      K000 H  
ATOM   3133  HA  ALA D   6      -7.924 107.408  71.304  1.00 56.21      K000 H  
ATOM   3134  HB1 ALA D   6     -10.151 108.017  70.906  1.00 63.21      K000 H  
ATOM   3135  HB2 ALA D   6      -9.807 106.719  70.057  1.00 63.21      K000 H  
ATOM   3136  HB3 ALA D   6     -10.640 106.589  71.404  1.00 63.21      K000 H  
ATOM   3137  N   GLU D   7      -8.718 108.782  73.159  1.00 45.61      K000 N  
ANISOU 3137  N   GLU D   7     6485   5873   4972    120   1483    395  K000 N  
ATOM   3138  CA  GLU D   7      -9.132 109.501  74.332  1.00 48.73      K000 C  
ANISOU 3138  CA  GLU D   7     6961   6598   4956   -122   1459    598  K000 C  
ATOM   3139  C   GLU D   7     -10.582 109.915  74.149  1.00 60.13      K000 C  
ANISOU 3139  C   GLU D   7     8484   8014   6347     75    993   1126  K000 C  
ATOM   3140  O   GLU D   7     -10.922 110.608  73.197  1.00 57.14      K000 O  
ANISOU 3140  O   GLU D   7     8170   7220   6321    356    868   1350  K000 O  
ATOM   3141  CB  GLU D   7      -8.212 110.694  74.596  1.00 70.21      K000 C  
ANISOU 3141  CB  GLU D   7     9675   9183   7820   -244   1840    509  K000 C  
ATOM   3142  CG  GLU D   7      -7.924 110.896  76.054  1.00 89.27      K000 C  
ANISOU 3142  CG  GLU D   7    12132  12076   9710   -675   2096    358  K000 C  
ATOM   3143  CD  GLU D   7      -7.021 112.085  76.285  1.00 96.89      K000 C  
ANISOU 3143  CD  GLU D   7    13020  12926  10867   -763   2538    261  K000 C  
ATOM   3144  OE1 GLU D   7      -6.738 112.789  75.281  1.00 95.53      K000 O  
ANISOU 3144  OE1 GLU D   7    12752  12286  11259   -481   2540    415  K000 O  
ATOM   3145  OE2 GLU D   7      -6.625 112.308  77.457  1.00 94.21      K000 O1-
ANISOU 3145  OE2 GLU D   7    12709  12980  10106  -1138   2876     49  K000 O1-
ATOM   3146  H   GLU D   7      -8.386 109.272  72.535  1.00 54.73      K000 H  
ATOM   3147  HA  GLU D   7      -9.083 108.911  75.099  1.00 58.48      K000 H  
ATOM   3148  HB2 GLU D   7      -7.367 110.549  74.141  1.00 84.25      K000 H  
ATOM   3149  HB3 GLU D   7      -8.636 111.500  74.260  1.00 84.25      K000 H  
ATOM   3150  HG2 GLU D   7      -8.756 111.051  76.526  1.00107.12      K000 H  
ATOM   3151  HG3 GLU D   7      -7.481 110.107  76.404  1.00107.12      K000 H  
ATOM   3152  N   ASP D   8     -11.435 109.471  75.051  1.00 53.94      K000 N  
ANISOU 3152  N   ASP D   8     7709   7645   5140    -95    712   1335  K000 N  
ATOM   3153  CA  ASP D   8     -12.871 109.639  74.908  1.00 63.65      K000 C  
ANISOU 3153  CA  ASP D   8     8976   8816   6394    130    227   1833  K000 C  
ATOM   3154  C   ASP D   8     -13.238 110.887  75.698  1.00 61.62      K000 C  
ANISOU 3154  C   ASP D   8     8867   8651   5895   -100    107   2202  K000 C  
ATOM   3155  O   ASP D   8     -13.169 110.869  76.920  1.00 71.09      K000 O  
ANISOU 3155  O   ASP D   8    10087  10322   6601   -537    113   2242  K000 O  
ATOM   3156  CB  ASP D   8     -13.631 108.423  75.434  1.00 68.70      K000 C  
ANISOU 3156  CB  ASP D   8     9475   9838   6790     69    -85   1947  K000 C  
ATOM   3157  CG  ASP D   8     -15.141 108.527  75.177  1.00 80.27      K000 C  
ANISOU 3157  CG  ASP D   8    10915  11147   8438    402   -580   2457  K000 C  
ATOM   3158  OD1 ASP D   8     -15.590 109.647  74.821  1.00 80.67      K000 O  
ANISOU 3158  OD1 ASP D   8    11137  10835   8677    576   -691   2720  K000 O  
ATOM   3159  OD2 ASP D   8     -15.866 107.501  75.294  1.00 83.26      K000 O1-
ANISOU 3159  OD2 ASP D   8    11091  11728   8817    498   -857   2596  K000 O1-
ATOM   3160  H   ASP D   8     -11.204 109.059  75.771  1.00 64.73      K000 H  
ATOM   3161  HA  ASP D   8     -13.098 109.776  73.975  1.00 76.39      K000 H  
ATOM   3162  HB2 ASP D   8     -13.302 107.626  74.988  1.00 82.44      K000 H  
ATOM   3163  HB3 ASP D   8     -13.491 108.351  76.391  1.00 82.44      K000 H  
ATOM   3164  N   CYS D   9     -13.544 111.970  74.994  1.00110.46      K000 N  
ANISOU 3164  N   CYS D   9    10345  19873  11750  -1498  -1729   2543  K000 N  
ATOM   3165  CA  CYS D   9     -13.860 113.250  75.602  1.00111.78      K000 C  
ANISOU 3165  CA  CYS D   9    11107  18119  13244   -558  -1274   3339  K000 C  
ATOM   3166  C   CYS D   9     -15.359 113.537  75.586  1.00115.86      K000 C  
ANISOU 3166  C   CYS D   9    12135  19028  12860    918  -1492   2919  K000 C  
ATOM   3167  O   CYS D   9     -15.767 114.693  75.704  1.00117.78      K000 O  
ANISOU 3167  O   CYS D   9    12856  17583  14311   1544  -1436   3592  K000 O  
ATOM   3168  CB  CYS D   9     -13.083 114.340  74.866  1.00109.92      K000 C  
ANISOU 3168  CB  CYS D   9    10860  15727  15177  -1658  -1659   4323  K000 C  
ATOM   3169  SG  CYS D   9     -11.369 113.849  74.471  1.00112.53      K000 S  
ANISOU 3169  SG  CYS D   9    10539  15882  16334  -3629  -1767   4620  K000 S  
ATOM   3170  H   CYS D   9     -13.575 111.985  74.135  1.00132.55      K000 H  
ATOM   3171  HA  CYS D   9     -13.565 113.242  76.526  1.00134.13      K000 H  
ATOM   3172  HB2 CYS D   9     -13.536 114.543  74.033  1.00131.90      K000 H  
ATOM   3173  HB3 CYS D   9     -13.046 115.133  75.425  1.00131.90      K000 H  
ATOM   3174  HG  CYS D   9     -11.394 112.875  73.770  1.00135.03      K000 H  
ATOM   3175  N   GLY D  10     -16.193 112.504  75.422  1.00121.16      K000 N  
ANISOU 3175  N   GLY D  10    12680  21875  11480   1477  -1777   1829  K000 N  
ATOM   3176  CA  GLY D  10     -17.630 112.726  75.392  1.00122.00      K000 C  
ANISOU 3176  CA  GLY D  10    13281  22439  10636   2921  -2039   1353  K000 C  
ATOM   3177  C   GLY D  10     -18.143 113.308  76.692  1.00143.23      K000 C  
ANISOU 3177  C   GLY D  10    16553  24305  13562   4397  -1201   1711  K000 C  
ATOM   3178  O   GLY D  10     -19.015 114.182  76.692  1.00148.39      K000 O  
ANISOU 3178  O   GLY D  10    17765  23974  14644   5360  -1353   1975  K000 O  
ATOM   3179  H   GLY D  10     -15.952 111.684  75.329  1.00145.39      K000 H  
ATOM   3180  HA2 GLY D  10     -17.848 113.338  74.672  1.00146.40      K000 H  
ATOM   3181  HA3 GLY D  10     -18.084 111.884  75.231  1.00146.40      K000 H  
ATOM   3182  N   SER D  11     -17.612 112.823  77.815  1.00149.83      K000 N  
ANISOU 3182  N   SER D  11    17303  25521  14104   4631   -338   1726  K000 N  
ATOM   3183  CA  SER D  11     -17.786 113.430  79.124  1.00149.59      K000 C  
ANISOU 3183  CA  SER D  11    17839  24470  14529   5877    627   2289  K000 C  
ATOM   3184  C   SER D  11     -16.797 114.584  79.299  1.00145.56      K000 C  
ANISOU 3184  C   SER D  11    17393  21560  16352   5206   1108   3644  K000 C  
ATOM   3185  O   SER D  11     -15.903 114.802  78.471  1.00126.08      K000 O  
ANISOU 3185  O   SER D  11    14505  18331  15068   3736    672   4048  K000 O  
ATOM   3186  CB  SER D  11     -17.570 112.379  80.214  1.00148.84      K000 C  
ANISOU 3186  CB  SER D  11    17659  25821  13074   6430   1269   1681  K000 C  
ATOM   3187  OG  SER D  11     -16.642 111.395  79.756  1.00143.15      K000 O  
ANISOU 3187  OG  SER D  11    16206  26180  12006   5038    938   1249  K000 O  
ATOM   3188  H   SER D  11     -17.127 112.114  77.838  1.00179.80      K000 H  
ATOM   3189  HA  SER D  11     -18.687 113.779  79.204  1.00179.51      K000 H  
ATOM   3190  HB2 SER D  11     -17.215 112.809  81.007  1.00178.61      K000 H  
ATOM   3191  HB3 SER D  11     -18.417 111.950  80.415  1.00178.61      K000 H  
ATOM   3192  HG  SER D  11     -15.906 111.758  79.574  1.00171.78      K000 H  
ATOM   3193  N   ASN D  12     -16.957 115.331  80.400  1.00150.09      K000 N  
ANISOU 3193  N   ASN D  12    18495  20933  17598   6332   2043   4379  K000 N  
ATOM   3194  CA  ASN D  12     -15.947 116.325  80.763  1.00152.43      K000 C  
ANISOU 3194  CA  ASN D  12    18777  19102  20038   5811   2720   5693  K000 C  
ATOM   3195  C   ASN D  12     -14.604 115.655  81.026  1.00148.13      K000 C  
ANISOU 3195  C   ASN D  12    17765  18940  19577   4779   3056   5672  K000 C  
ATOM   3196  O   ASN D  12     -13.587 116.024  80.427  1.00139.49      K000 O  
ANISOU 3196  O   ASN D  12    16258  16764  19978   3394   2826   6263  K000 O  
ATOM   3197  CB  ASN D  12     -16.394 117.127  81.984  1.00147.50      K000 C  
ANISOU 3197  CB  ASN D  12    18798  17355  19890   7340   3806   6481  K000 C  
ATOM   3198  CG  ASN D  12     -17.494 118.122  81.654  1.00164.28      K000 C  
ANISOU 3198  CG  ASN D  12    21320  18478  22622   7856   3403   6704  K000 C  
ATOM   3199  ND2 ASN D  12     -18.274 118.509  82.666  1.00165.23      K000 N  
ANISOU 3199  ND2 ASN D  12    21969  18606  22205   8659   3986   6494  K000 N  
ATOM   3200  OD1 ASN D  12     -17.633 118.549  80.505  1.00165.00      K000 O  
ANISOU 3200  OD1 ASN D  12    21214  17923  23556   7119   2429   6800  K000 O  
ATOM   3201  H   ASN D  12     -17.627 115.282  80.938  1.00180.11      K000 H  
ATOM   3202  HA  ASN D  12     -15.834 116.943  80.024  1.00182.92      K000 H  
ATOM   3203  HB2 ASN D  12     -16.732 116.517  82.658  1.00177.00      K000 H  
ATOM   3204  HB3 ASN D  12     -15.636 117.621  82.333  1.00177.00      K000 H  
ATOM   3205 HD21 ASN D  12     -18.910 119.071  82.528  1.00198.28      K000 H  
ATOM   3206 HD22 ASN D  12     -18.140 118.196  83.456  1.00198.28      K000 H  
ATOM   3207  N   LYS D  13     -14.589 114.652  81.910  1.00145.57      K000 N  
ANISOU 3207  N   LYS D  13    17514  20131  17663   5452   3514   4955  K000 N  
ATOM   3208  CA  LYS D  13     -13.386 113.855  82.123  1.00131.26      K000 C  
ANISOU 3208  CA  LYS D  13    15260  18896  15717   4502   3643   4742  K000 C  
ATOM   3209  C   LYS D  13     -12.999 113.127  80.842  1.00118.38      K000 C  
ANISOU 3209  C   LYS D  13    12926  18246  13806   2882   2569   4136  K000 C  
ATOM   3210  O   LYS D  13     -13.828 112.479  80.193  1.00125.61      K000 O  
ANISOU 3210  O   LYS D  13    13691  20664  13372   2954   1854   3244  K000 O  
ATOM   3211  CB  LYS D  13     -13.599 112.852  83.267  1.00123.75      K000 C  
ANISOU 3211  CB  LYS D  13    14556  19488  12975   5651   4131   3931  K000 C  
ATOM   3212  CG  LYS D  13     -14.399 111.588  82.924  1.00131.43      K000 C  
ANISOU 3212  CG  LYS D  13    15271  22803  11863   5840   3382   2535  K000 C  
ATOM   3213  CD  LYS D  13     -13.519 110.334  82.762  1.00133.00      K000 C  
ANISOU 3213  CD  LYS D  13    14800  24364  11370   4709   2966   1817  K000 C  
ATOM   3214  CE  LYS D  13     -14.368 109.062  82.573  1.00138.96      K000 C  
ANISOU 3214  CE  LYS D  13    15245  27479  10074   5072   2345    473  K000 C  
ATOM   3215  NZ  LYS D  13     -13.654 107.836  83.052  1.00141.21      K000 N1+
ANISOU 3215  NZ  LYS D  13    15138  28470  10047   4473   2025   -175  K000 N1+
ATOM   3216  H   LYS D  13     -15.259 114.417  82.395  1.00174.68      K000 H  
ATOM   3217  HA  LYS D  13     -12.655 114.443  82.369  1.00157.51      K000 H  
ATOM   3218  HB2 LYS D  13     -12.728 112.564  83.585  1.00148.50      K000 H  
ATOM   3219  HB3 LYS D  13     -14.069 113.304  83.985  1.00148.50      K000 H  
ATOM   3220  HG2 LYS D  13     -15.035 111.417  83.635  1.00157.71      K000 H  
ATOM   3221  HG3 LYS D  13     -14.869 111.733  82.088  1.00157.71      K000 H  
ATOM   3222  HD2 LYS D  13     -12.953 110.439  81.981  1.00159.60      K000 H  
ATOM   3223  HD3 LYS D  13     -12.976 110.219  83.557  1.00159.60      K000 H  
ATOM   3224  HE2 LYS D  13     -15.192 109.149  83.079  1.00166.75      K000 H  
ATOM   3225  HE3 LYS D  13     -14.567 108.948  81.630  1.00166.75      K000 H  
ATOM   3226  HZ1 LYS D  13     -14.166 107.119  82.931  1.00169.46      K000 H  
ATOM   3227  HZ2 LYS D  13     -12.895 107.731  82.598  1.00169.46      K000 H  
ATOM   3228  HZ3 LYS D  13     -13.465 107.914  83.918  1.00169.46      K000 H  
ATOM   3229  N   CYS D  14     -11.743 113.253  80.459  1.00112.84      K000 N  
ANISOU 3229  N   CYS D  14    11806  16679  14389   1449   2472   4658  K000 N  
ATOM   3230  CA  CYS D  14     -11.241 112.394  79.410  1.00122.52      K000 C  
ANISOU 3230  CA  CYS D  14    12380  18988  15185    -65   1576   4079  K000 C  
ATOM   3231  C   CYS D  14     -10.798 111.080  80.022  1.00123.95      K000 C  
ANISOU 3231  C   CYS D  14    12265  20812  14019   -140   1693   3280  K000 C  
ATOM   3232  O   CYS D  14     -10.506 110.989  81.223  1.00120.72      K000 O  
ANISOU 3232  O   CYS D  14    12159  20253  13458    705   2458   3363  K000 O  
ATOM   3233  CB  CYS D  14     -10.095 113.045  78.657  1.00106.20      K000 C  
ANISOU 3233  CB  CYS D  14     9994  15322  15035  -1626   1289   4926  K000 C  
ATOM   3234  SG  CYS D  14     -10.678 114.404  77.685  1.00109.95      K000 S  
ANISOU 3234  SG  CYS D  14    10706  14099  16971  -1712    771   5640  K000 S  
ATOM   3235  H   CYS D  14     -11.175 113.812  80.781  1.00135.41      K000 H  
ATOM   3236  HA  CYS D  14     -11.954 112.211  78.778  1.00147.03      K000 H  
ATOM   3237  HB2 CYS D  14      -9.440 113.379  79.290  1.00127.44      K000 H  
ATOM   3238  HB3 CYS D  14      -9.689 112.394  78.062  1.00127.44      K000 H  
ATOM   3239  HG  CYS D  14     -11.488 114.002  76.897  1.00131.94      K000 H  
ATOM   3240  N   ALA D  15     -10.822 110.051  79.191  1.00 57.58      K000 N  
ANISOU 3240  N   ALA D  15     8192   7396   6291   1073   1327    336  K000 N  
ATOM   3241  CA  ALA D  15     -10.311 108.740  79.532  1.00 60.34      K000 C  
ANISOU 3241  CA  ALA D  15     8365   8235   6327    645   1306    152  K000 C  
ATOM   3242  C   ALA D  15      -9.879 107.988  78.267  1.00 59.58      K000 C  
ANISOU 3242  C   ALA D  15     8266   7993   6378    532   1211     58  K000 C  
ATOM   3243  O   ALA D  15     -10.536 108.091  77.232  1.00 56.27      K000 O  
ANISOU 3243  O   ALA D  15     7895   7424   6061    838   1139    251  K000 O  
ATOM   3244  CB  ALA D  15     -11.374 107.917  80.247  1.00 78.94      K000 C  
ANISOU 3244  CB  ALA D  15    10399  11454   8142    678   1221    445  K000 C  
ATOM   3245  H   ALA D  15     -11.143 110.092  78.394  1.00 69.10      K000 H  
ATOM   3246  HA  ALA D  15      -9.542 108.831  80.117  1.00 72.41      K000 H  
ATOM   3247  HB1 ALA D  15     -11.006 107.047  80.464  1.00 94.73      K000 H  
ATOM   3248  HB2 ALA D  15     -11.636 108.378  81.060  1.00 94.73      K000 H  
ATOM   3249  HB3 ALA D  15     -12.142 107.816  79.662  1.00 94.73      K000 H  
ATOM   3250  N   ILE D  16      -8.806 107.202  78.363  1.00 51.91      K000 N  
ANISOU 3250  N   ILE D  16     7288   7054   5382     65   1258   -243  K000 N  
ATOM   3251  CA  ILE D  16      -8.377 106.384  77.236  1.00 56.70      K000 C  
ANISOU 3251  CA  ILE D  16     7863   7584   6098    -71   1165   -332  K000 C  
ATOM   3252  C   ILE D  16      -9.306 105.199  77.129  1.00 63.80      K000 C  
ANISOU 3252  C   ILE D  16     8478   9217   6545    -34   1025   -124  K000 C  
ATOM   3253  O   ILE D  16      -9.519 104.492  78.099  1.00 59.54      K000 O  
ANISOU 3253  O   ILE D  16     7737   9322   5562   -295    996    -78  K000 O  
ATOM   3254  CB  ILE D  16      -6.938 105.883  77.416  1.00 63.34      K000 C  
ANISOU 3254  CB  ILE D  16     8790   8209   7068   -580   1331   -700  K000 C  
ATOM   3255  CG1 ILE D  16      -5.906 107.019  77.443  1.00 72.58      K000 C  
ANISOU 3255  CG1 ILE D  16    10162   8580   8835   -583   1563   -789  K000 C  
ATOM   3256  CG2 ILE D  16      -6.613 104.906  76.254  1.00 57.66      K000 C  
ANISOU 3256  CG2 ILE D  16     7993   7511   6404   -712   1205   -762  K000 C  
ATOM   3257  CD1 ILE D  16      -5.844 107.805  76.135  1.00 91.68      K000 C  
ANISOU 3257  CD1 ILE D  16    12618  10444  11770   -319   1389   -559  K000 C  
ATOM   3258  H   ILE D  16      -8.314 107.127  79.064  1.00 62.30      K000 H  
ATOM   3259  HA  ILE D  16      -8.430 106.900  76.416  1.00 68.04      K000 H  
ATOM   3260  HB  ILE D  16      -6.884 105.396  78.253  1.00 76.01      K000 H  
ATOM   3261 HG12 ILE D  16      -6.137 107.637  78.154  1.00 87.10      K000 H  
ATOM   3262 HG13 ILE D  16      -5.027 106.642  77.607  1.00 87.10      K000 H  
ATOM   3263 HG21 ILE D  16      -5.704 104.582  76.359  1.00 69.19      K000 H  
ATOM   3264 HG22 ILE D  16      -7.234 104.162  76.285  1.00 69.19      K000 H  
ATOM   3265 HG23 ILE D  16      -6.702 105.377  75.411  1.00 69.19      K000 H  
ATOM   3266 HD11 ILE D  16      -5.176 108.504  76.218  1.00110.01      K000 H  
ATOM   3267 HD12 ILE D  16      -5.604 107.201  75.415  1.00110.01      K000 H  
ATOM   3268 HD13 ILE D  16      -6.714 108.198  75.962  1.00110.01      K000 H  
ATOM   3269  N   ILE D  17      -9.837 104.948  75.955  1.00 54.61      K000 N  
ANISOU 3269  N   ILE D  17     7300   7968   5483    233    954     44  K000 N  
ATOM   3270  CA  ILE D  17     -10.556 103.712  75.762  1.00 51.98      K000 C  
ANISOU 3270  CA  ILE D  17     6652   8276   4823    259    888    281  K000 C  
ATOM   3271  C   ILE D  17      -9.986 102.907  74.578  1.00 51.56      K000 C  
ANISOU 3271  C   ILE D  17     6638   8056   4898     87    833    119  K000 C  
ATOM   3272  O   ILE D  17      -9.323 103.449  73.686  1.00 51.52      K000 O  
ANISOU 3272  O   ILE D  17     6921   7403   5250     63    831    -72  K000 O  
ATOM   3273  CB  ILE D  17     -12.040 104.016  75.541  1.00 57.54      K000 C  
ANISOU 3273  CB  ILE D  17     7268   9102   5491    835    994    753  K000 C  
ATOM   3274  CG1 ILE D  17     -12.189 104.872  74.271  1.00 56.50      K000 C  
ANISOU 3274  CG1 ILE D  17     7570   8197   5699   1122   1098    713  K000 C  
ATOM   3275  CG2 ILE D  17     -12.641 104.750  76.710  1.00 67.41      K000 C  
ANISOU 3275  CG2 ILE D  17     8436  10561   6616   1015   1043    957  K000 C  
ATOM   3276  CD1 ILE D  17     -13.620 104.963  73.791  1.00 60.82      K000 C  
ANISOU 3276  CD1 ILE D  17     8158   8743   6207   1649   1355   1133  K000 C  
ATOM   3277  H   ILE D  17      -9.797 105.462  75.266  1.00 65.54      K000 H  
ATOM   3278  HA  ILE D  17     -10.476 103.169  76.562  1.00 62.38      K000 H  
ATOM   3279  HB  ILE D  17     -12.517 103.181  75.416  1.00 69.05      K000 H  
ATOM   3280 HG12 ILE D  17     -11.877 105.771  74.457  1.00 67.80      K000 H  
ATOM   3281 HG13 ILE D  17     -11.660 104.477  73.560  1.00 67.80      K000 H  
ATOM   3282 HG21 ILE D  17     -13.578 104.921  76.527  1.00 80.89      K000 H  
ATOM   3283 HG22 ILE D  17     -12.553 104.202  77.505  1.00 80.89      K000 H  
ATOM   3284 HG23 ILE D  17     -12.168 105.588  76.832  1.00 80.89      K000 H  
ATOM   3285 HD11 ILE D  17     -13.649 105.513  72.992  1.00 72.98      K000 H  
ATOM   3286 HD12 ILE D  17     -13.945 104.071  73.592  1.00 72.98      K000 H  
ATOM   3287 HD13 ILE D  17     -14.162 105.365  74.489  1.00 72.98      K000 H  
HETATM 3288  N   SAR D  18     -10.292 101.604  74.546  1.00 51.98      K000 N  
ANISOU 3288  N   SAR D  18     6363   8729   4657    -47    765    271  K000 N  
HETATM 3289  CA  SAR D  18      -9.957 100.771  73.415  1.00 51.29      K000 C  
ANISOU 3289  CA  SAR D  18     6278   8550   4661   -146    729    181  K000 C  
HETATM 3290  C   SAR D  18     -11.072 100.632  72.565  1.00 55.63      K000 C  
ANISOU 3290  C   SAR D  18     6794   9093   5252    321    850    546  K000 C  
HETATM 3291  O   SAR D  18     -12.200 100.586  72.984  1.00 65.11      K000 O  
ANISOU 3291  O   SAR D  18     7755  10668   6318    669    964    984  K000 O  
HETATM 3292  CN  SAR D  18     -10.945 100.860  75.624  1.00 58.59      K000 C  
ANISOU 3292  CN  SAR D  18     6777  10431   5054   -168    687    597  K000 C  
HETATM 3293  HN1 SAR D  18     -10.313 100.208  76.002  1.00 70.31      K000 H  
HETATM 3294  HN2 SAR D  18     -11.730 100.386  75.267  1.00 70.31      K000 H  
HETATM 3295  HN3 SAR D  18     -11.230 101.482  76.323  1.00 70.31      K000 H  
HETATM 3296  HA2 SAR D  18      -9.112 100.879  72.956  1.00 61.55      K000 H  
HETATM 3297  HA3 SAR D  18      -9.929  99.921  73.917  1.00 61.55      K000 H  
ATOM   3298  N   LEU D  19     -10.826 100.531  71.269  1.00 48.10      K000 N  
ANISOU 3298  N   LEU D  19     6098   7678   4500    347    887    420  K000 N  
ATOM   3299  CA  LEU D  19     -11.895 100.257  70.285  1.00 49.39      K000 C  
ANISOU 3299  CA  LEU D  19     6336   7749   4681    757   1126    745  K000 C  
ATOM   3300  C   LEU D  19     -11.553  99.061  69.440  1.00 49.91      K000 C  
ANISOU 3300  C   LEU D  19     6287   7953   4724    567   1093    687  K000 C  
ATOM   3301  O   LEU D  19     -10.599  99.116  68.661  1.00 51.19      K000 O  
ANISOU 3301  O   LEU D  19     6725   7689   5037    269    966    336  K000 O  
ATOM   3302  CB  LEU D  19     -12.116 101.461  69.368  1.00 50.50      K000 C  
ANISOU 3302  CB  LEU D  19     7085   7080   5021    944   1270    670  K000 C  
ATOM   3303  CG  LEU D  19     -12.564 102.711  70.150  1.00 64.28      K000 C  
ANISOU 3303  CG  LEU D  19     8969   8654   6799   1170   1330    763  K000 C  
ATOM   3304  CD1 LEU D  19     -12.383 103.889  69.279  1.00 78.25      K000 C  
ANISOU 3304  CD1 LEU D  19    11348   9645   8740   1107   1332    620  K000 C  
ATOM   3305  CD2 LEU D  19     -14.003 102.536  70.540  1.00 69.76      K000 C  
ANISOU 3305  CD2 LEU D  19     9458   9675   7370   1682   1669   1247  K000 C  
ATOM   3306  H   LEU D  19     -10.045 100.616  70.919  1.00 57.72      K000 H  
ATOM   3307  HA  LEU D  19     -12.725 100.072  70.754  1.00 59.26      K000 H  
ATOM   3308  HB2 LEU D  19     -11.285 101.671  68.914  1.00 60.60      K000 H  
ATOM   3309  HB3 LEU D  19     -12.806 101.245  68.721  1.00 60.60      K000 H  
ATOM   3310  HG  LEU D  19     -12.026 102.817  70.950  1.00 77.13      K000 H  
ATOM   3311 HD11 LEU D  19     -12.663 104.683  69.762  1.00 93.90      K000 H  
ATOM   3312 HD12 LEU D  19     -11.447 103.962  69.037  1.00 93.90      K000 H  
ATOM   3313 HD13 LEU D  19     -12.924 103.779  68.482  1.00 93.90      K000 H  
ATOM   3314 HD21 LEU D  19     -14.294 103.319  71.033  1.00 83.71      K000 H  
ATOM   3315 HD22 LEU D  19     -14.538 102.434  69.736  1.00 83.71      K000 H  
ATOM   3316 HD23 LEU D  19     -14.087 101.746  71.095  1.00 83.71      K000 H  
ATOM   3317  N   MET D  20     -12.389  98.034  69.476  1.00 52.35      K000 N  
ANISOU 3317  N   MET D  20     6185   8808   4896    774   1235   1106  K000 N  
ATOM   3318  CA  MET D  20     -12.049  96.735  68.919  1.00 53.46      K000 C  
ANISOU 3318  CA  MET D  20     6083   9249   4980    551   1168   1102  K000 C  
ATOM   3319  C   MET D  20     -12.751  96.505  67.596  1.00 54.32      K000 C  
ANISOU 3319  C   MET D  20     6446   8963   5229    906   1530   1290  K000 C  
ATOM   3320  O   MET D  20     -13.960  96.717  67.485  1.00 63.77      K000 O  
ANISOU 3320  O   MET D  20     7661  10087   6482   1417   1938   1731  K000 O  
ATOM   3321  CB  MET D  20     -12.406  95.631  69.916  1.00 67.99      K000 C  
ANISOU 3321  CB  MET D  20     7220  12054   6558    425   1039   1520  K000 C  
ATOM   3322  CG  MET D  20     -12.066  94.242  69.410  1.00 81.29      K000 C  
ANISOU 3322  CG  MET D  20     8606  14116   8164    149    941   1562  K000 C  
ATOM   3323  SD  MET D  20     -12.257  92.892  70.601  1.00 98.37      K000 S  
ANISOU 3323  SD  MET D  20     9948  17496   9931   -266    647   2063  K000 S  
ATOM   3324  CE  MET D  20     -10.906  93.213  71.693  1.00 79.56      K000 C  
ANISOU 3324  CE  MET D  20     7806  15177   7244  -1038    301   1411  K000 C  
ATOM   3325  H   MET D  20     -13.174  98.065  69.824  1.00 62.81      K000 H  
ATOM   3326  HA  MET D  20     -11.090  96.702  68.773  1.00 64.15      K000 H  
ATOM   3327  HB2 MET D  20     -11.915  95.778  70.739  1.00 81.58      K000 H  
ATOM   3328  HB3 MET D  20     -13.360  95.660  70.090  1.00 81.58      K000 H  
ATOM   3329  HG2 MET D  20     -12.640  94.043  68.654  1.00 97.55      K000 H  
ATOM   3330  HG3 MET D  20     -11.140  94.242  69.120  1.00 97.55      K000 H  
ATOM   3331  HE1 MET D  20     -10.900  92.541  72.393  1.00 95.47      K000 H  
ATOM   3332  HE2 MET D  20     -10.078  93.175  71.190  1.00 95.47      K000 H  
ATOM   3333  HE3 MET D  20     -11.018  94.094  72.081  1.00 95.47      K000 H  
ATOM   3334  N   VAL D  21     -11.972  96.107  66.599  1.00 53.49      K000 N  
ANISOU 3334  N   VAL D  21     6586   8550   5187    620   1437    955  K000 N  
ATOM   3335  CA  VAL D  21     -12.432  95.685  65.278  1.00 61.78      K000 C  
ANISOU 3335  CA  VAL D  21     7922   9240   6311    809   1765   1056  K000 C  
ATOM   3336  C   VAL D  21     -11.845  94.324  65.035  1.00 55.25      K000 C  
ANISOU 3336  C   VAL D  21     6707   8852   5435    518   1588   1011  K000 C  
ATOM   3337  O   VAL D  21     -10.690  94.232  64.577  1.00 57.76      K000 O  
ANISOU 3337  O   VAL D  21     7212   8946   5790     80   1308    562  K000 O  
ATOM   3338  CB  VAL D  21     -11.954  96.635  64.193  1.00 67.53      K000 C  
ANISOU 3338  CB  VAL D  21     9414   9119   7124    622   1758    677  K000 C  
ATOM   3339  CG1 VAL D  21     -12.584  96.207  62.823  1.00 62.16      K000 C  
ANISOU 3339  CG1 VAL D  21     9155   8031   6433    780   2194    794  K000 C  
ATOM   3340  CG2 VAL D  21     -12.240  98.110  64.619  1.00 75.91      K000 C  
ANISOU 3340  CG2 VAL D  21    10843   9786   8214    744   1783    652  K000 C  
ATOM   3341  H   VAL D  21     -11.115  96.070  66.670  1.00 64.18      K000 H  
ATOM   3342  HA  VAL D  21     -13.400  95.629  65.256  1.00 74.13      K000 H  
ATOM   3343  HB  VAL D  21     -10.993  96.542  64.109  1.00 81.03      K000 H  
ATOM   3344 HG11 VAL D  21     -12.278  96.816  62.132  1.00 74.59      K000 H  
ATOM   3345 HG12 VAL D  21     -12.304  95.302  62.615  1.00 74.59      K000 H  
ATOM   3346 HG13 VAL D  21     -13.551  96.247  62.894  1.00 74.59      K000 H  
ATOM   3347 HG21 VAL D  21     -11.930  98.706  63.918  1.00 91.09      K000 H  
ATOM   3348 HG22 VAL D  21     -13.195  98.222  64.751  1.00 91.09      K000 H  
ATOM   3349 HG23 VAL D  21     -11.768  98.297  65.445  1.00 91.09      K000 H  
TER    3350      VAL D  21 
HETATM 3351  N   ORN E   1       3.396 110.459  55.686  1.00 73.57      K000 N  
ANISOU 3351  N   ORN E   1     9610  10043   8300   1987  -1853   -893  K000 N  
HETATM 3352  CA  ORN E   1       2.234 109.634  55.968  1.00 71.69      K000 C  
ANISOU 3352  CA  ORN E   1     9185  10149   7905   1378  -1248   -813  K000 C  
HETATM 3353  C   ORN E   1       1.970 109.701  57.466  1.00 70.35      K000 C  
ANISOU 3353  C   ORN E   1     8596  10080   8055   1686   -929  -1193  K000 C  
HETATM 3354  O   ORN E   1       2.736 110.281  58.245  1.00 82.96      K000 O  
ANISOU 3354  O   ORN E   1    10092  11495   9934   2275  -1134  -1524  K000 O  
HETATM 3355  CB  ORN E   1       2.490 108.146  55.576  1.00 65.62      K000 C  
ANISOU 3355  CB  ORN E   1     9127   8964   6841    707  -1430   -422  K000 C  
HETATM 3356  CG  ORN E   1       2.358 107.826  54.082  1.00 77.26      K000 C  
ANISOU 3356  CG  ORN E   1    11019  10505   7832     29  -1548    -24  K000 C  
HETATM 3357  CD  ORN E   1       0.903 107.821  53.552  1.00 58.27      K000 C  
ANISOU 3357  CD  ORN E   1     8071   8833   5237   -544   -865    -95  K000 C  
HETATM 3358  NE  ORN E   1       0.142 106.768  54.107  1.00 56.09      K000 N  
ANISOU 3358  NE  ORN E   1     7640   8683   4988  -1013   -431   -197  K000 N  
HETATM 3359  HA  ORN E   1       1.387 110.086  55.445  1.00 86.03      K000 H  
HETATM 3360  HB2 ORN E   1       1.764 107.514  56.108  1.00 78.74      K000 H  
HETATM 3361  HB3 ORN E   1       3.513 107.883  55.883  1.00 78.74      K000 H  
HETATM 3362  HG2 ORN E   1       2.937 108.565  53.515  1.00 92.71      K000 H  
HETATM 3363  HG3 ORN E   1       2.790 106.835  53.902  1.00 92.71      K000 H  
HETATM 3364  HD2 ORN E   1       0.431 108.773  53.809  1.00 69.93      K000 H
[truncated: 2,095,271 more chars]
